# Supplementary material
Source: publisher figshare collection journal article supplement (https://gsajournals.figshare.com/ndownloader/files/23715635)
Supplement: Supplementary file 1 [file 23715635]

## Sheet: High
CHROM	POS	REF	ALT	allele_set	aaf	call_rate	is_snp	is_indel	is_transition	nucl_diversity	num_called	num_het	num_hom_alt	num_hom_ref	ANN	Mutation type	Impact	Gene name	WBGene ID	Transcript?	Gene ID	Gene Type
IV	12506177	C	[T]	{C, T}	0.0307692	0.984848	TRUE	FALSE	TRUE	0.0601073	65	0	2	63	T	stop_gained	HIGH	sru-17	WBGene00005680	transcript	T04A11.10	protein_coding
IV	12507300	G	[A]	{G, A}	0.0151515	1	TRUE	FALSE	TRUE	0.0300717	66	0	1	65	A	stop_gained	HIGH	sru-17	WBGene00005680	transcript	T04A11.10	protein_coding
IV	12589329	GC	[G]	{G, GC}	0.030303	1	FALSE	TRUE	FALSE	0.0592181	66	0	2	64	G	frameshift_variant	HIGH	cul-6	WBGene00000841	transcript	K08E7.7a	protein_coding
IV	12674363	GCAATCTTC	[G]	{G, GCAATCTTC}	0.0307692	0.984848	FALSE	TRUE	FALSE	0.0601073	65	0	2	63	G	frameshift_variant	HIGH	wdfy-3	WBGene00007752	transcript	C26H9A.2c	protein_coding
IV	12674364	CAATCTTCA	[C]	{C, CAATCTTCA}	0.153846	0.984848	FALSE	TRUE	FALSE	0.262373	65	0	10	55	C	frameshift_variant	HIGH	wdfy-3	WBGene00007752	transcript	C26H9A.2c	protein_coding
IV	12675319	G	[T]	{G, T}	0.430769	0.984848	TRUE	FALSE	FALSE	0.494216	65	0	28	37	T	splice_donor_variant&intron_variant	HIGH	T23B5.4	WBGene00011941	transcript	T23B5.4a	protein_coding
IV	12765721	C	[T]	{C, T}	0.469697	1	TRUE	FALSE	TRUE	0.501966	66	0	31	35	T	stop_gained	HIGH	ZK897.10	WBGene00206520	transcript	ZK897.10b	protein_coding
IV	12792837	T	[TCAG]	{TCAG, T}	0.0151515	1	FALSE	TRUE	FALSE	0.0300717	66	0	1	65	TCAG	start_lost&conservative_inframe_insertion	HIGH	F07C6.6	WBGene00045067	transcript	F07C6.6	protein_coding
IV	12858130	G	[T]	{G, T}	0.0454545	1	TRUE	FALSE	FALSE	0.0874393	66	0	3	63	T	splice_donor_variant&intron_variant	HIGH	nstp-5	WBGene00014139	transcript	ZK896.9a	protein_coding
IV	12863023	G	[A]	{G, A}	0.0606061	1	TRUE	FALSE	TRUE	0.114735	66	0	4	62	A	splice_donor_variant&intron_variant	HIGH	gcy-18	WBGene00001543	transcript	ZK896.8	protein_coding
IV	12865362	T	[A]	{A, T}	0.0606061	1	TRUE	FALSE	FALSE	0.114735	66	0	4	62	A	stop_gained	HIGH	gcy-18	WBGene00001543	transcript	ZK896.8	protein_coding
IV	12872942	CA	[C]	{C, CA}	0.0454545	1	FALSE	TRUE	FALSE	0.0874393	66	0	3	63	C	frameshift_variant	HIGH	ZK896.1	WBGene00014132	transcript	ZK896.1	protein_coding
IV	12873065	CAT	[C]	{C, CAT}	0.0757576	1	FALSE	TRUE	FALSE	0.141106	66	0	5	61	C	frameshift_variant&splice_region_variant	HIGH	ZK896.1	WBGene00014132	transcript	ZK896.1	protein_coding
IV	12873430	CGTGTA	[C]	{C, CGTGTA}	0.0151515	1	FALSE	TRUE	FALSE	0.0300717	66	0	1	65	C	frameshift_variant	HIGH	ZK896.1	WBGene00014132	transcript	ZK896.1	protein_coding
IV	12874220	A	[T]	{A, T}	0.0909091	1	TRUE	FALSE	FALSE	0.166551	66	0	6	60	T	stop_gained	HIGH	ZK896.1	WBGene00014132	transcript	ZK896.1	protein_coding
IV	12874656	G	[A]	{G, A}	0.0909091	1	TRUE	FALSE	TRUE	0.166551	66	0	6	60	A	splice_donor_variant&intron_variant	HIGH	ZK896.1	WBGene00014132	transcript	ZK896.1	protein_coding
IV	12874706	G	[A]	{G, A}	0.0909091	1	TRUE	FALSE	TRUE	0.166551	66	0	6	60	A	stop_gained	HIGH	ZK896.1	WBGene00014132	transcript	ZK896.1	protein_coding
IV	12879629	A	[AT]	{AT, A}	0.0757576	1	FALSE	TRUE	FALSE	0.141106	66	0	5	61	AT	frameshift_variant&start_lost	HIGH	ZK896.5	WBGene00014136	transcript	ZK896.5.1	protein_coding
IV	12881446	CT	[C]	{CT, C}	0.030303	1	FALSE	TRUE	FALSE	0.0592181	66	0	2	64	C	splice_acceptor_variant&intron_variant	HIGH	ZK896.4	WBGene00014135	transcript	ZK896.4	protein_coding
IV	12894330	AAT	[A]	{AAT, A}	0.0151515	1	FALSE	TRUE	FALSE	0.0300717	66	0	1	65	A	frameshift_variant	HIGH	K08D8.12	WBGene00194926	transcript	K08D8.12a	protein_coding
IV	12895398	T	[C]	{C, T}	0.0909091	1	TRUE	FALSE	TRUE	0.166551	66	0	6	60	C	stop_lost	HIGH	K08D8.11	WBGene00194925	transcript	K08D8.11	protein_coding
IV	12896145	G	[A]	{G, A}	0.0151515	1	TRUE	FALSE	TRUE	0.0300717	66	0	1	65	A	splice_acceptor_variant&intron_variant	HIGH	K08D8.11	WBGene00194925	transcript	K08D8.11	protein_coding
IV	12900001	G	[GT]	{G, GT}	0.0151515	1	FALSE	TRUE	FALSE	0.0300717	66	0	1	65	GT	frameshift_variant	HIGH	K08D8.9	WBGene00194918	transcript	K08D8.9	protein_coding
IV	12904216	C	[CAG]	{C, CAG}	0.0909091	1	FALSE	TRUE	FALSE	0.166551	66	0	6	60	CAG	frameshift_variant	HIGH	K08D8.3	WBGene00010657	transcript	K08D8.3	protein_coding
IV	12904324	C	[CT]	{C, CT}	0.0151515	1	FALSE	TRUE	FALSE	0.0300717	66	0	1	65	CT	frameshift_variant	HIGH	K08D8.3	WBGene00010657	transcript	K08D8.3	protein_coding
IV	12904616	TAACCGTCAAA	[T]	{TAACCGTCAAA, T}	0.0151515	1	FALSE	TRUE	FALSE	0.0300717	66	0	1	65	T	frameshift_variant	HIGH	K08D8.3	WBGene00010657	transcript	K08D8.3	protein_coding
IV	12905741	TAC	[T]	{TAC, T}	0.0151515	1	FALSE	TRUE	FALSE	0.0300717	66	0	1	65	T	frameshift_variant	HIGH	K08D8.3	WBGene00010657	transcript	K08D8.3	protein_coding
IV	12906352	AT	[A]	{AT, A}	0.0454545	1	FALSE	TRUE	FALSE	0.0874393	66	0	3	63	A	frameshift_variant	HIGH	K08D8.3	WBGene00010657	transcript	K08D8.3	protein_coding
IV	12906553	G	[T]	{G, T}	0.0769231	0.984848	TRUE	FALSE	FALSE	0.143113	65	0	5	60	T	stop_gained	HIGH	K08D8.3	WBGene00010657	transcript	K08D8.3	protein_coding
IV	12912100	T	[A]	{A, T}	0.0151515	1	TRUE	FALSE	FALSE	0.0300717	66	0	1	65	A	stop_gained	HIGH	K08D8.5	WBGene00010659	transcript	K08D8.5	protein_coding
IV	12912790	CTA	[C]	{C, CTA}	0.0151515	1	FALSE	TRUE	FALSE	0.0300717	66	0	1	65	C	frameshift_variant&stop_lost&splice_region_variant	HIGH	irg-6	WBGene00007864	transcript	C32H11.1a	protein_coding
IV	12912816	T	[TA]	{TA, T}	0.0151515	1	FALSE	TRUE	FALSE	0.0300717	66	0	1	65	TA	frameshift_variant	HIGH	irg-6	WBGene00007864	transcript	C32H11.1a	protein_coding
IV	12916667	A	[AT]	{AT, A}	0.0151515	1	FALSE	TRUE	FALSE	0.0300717	66	0	1	65	AT	frameshift_variant	HIGH	srz-15	WBGene00007865	transcript	C32H11.2	protein_coding
IV	12919091	G	[A]	{G, A}	0.0151515	1	TRUE	FALSE	TRUE	0.0300717	66	0	1	65	A	stop_gained	HIGH	C32H11.3	WBGene00007866	transcript	C32H11.3	protein_coding
IV	12925972	CT	[C]	{CT, C}	0.0151515	1	FALSE	TRUE	FALSE	0.0300717	66	0	1	65	C	frameshift_variant	HIGH	C32H11.6	WBGene00007869	transcript	C32H11.6	protein_coding
IV	12944017	T	[G]	{G, T}	0.0151515	1	TRUE	FALSE	FALSE	0.0300717	66	0	1	65	G	splice_donor_variant&intron_variant	HIGH	dct-19	WBGene00007876	transcript	C32H11.13	protein_coding
IV	12944321	T	[TATAC]	{TATAC, T}	0.0151515	1	FALSE	TRUE	FALSE	0.0300717	66	0	1	65	TATAC	frameshift_variant	HIGH	dct-19	WBGene00007876	transcript	C32H11.13	protein_coding
IV	12949962	T	[TA]	{TA, T}	0.121212	1	FALSE	TRUE	FALSE	0.214666	66	0	8	58	TA	frameshift_variant	HIGH	F55G11.10	WBGene00010129	transcript	F55G11.10	protein_coding
IV	12949972	T	[A]	{A, T}	0.0151515	1	TRUE	FALSE	FALSE	0.0300717	66	0	1	65	A	stop_gained	HIGH	F55G11.10	WBGene00010129	transcript	F55G11.10	protein_coding
IV	12955104	C	[T]	{C, T}	0.272727	1	TRUE	FALSE	TRUE	0.399722	66	0	18	48	T	splice_donor_variant&intron_variant	HIGH	abt-3	WBGene00000021	transcript	F55G11.9	pseudogene
IV	12970497	T	[C]	{C, T}	0.0151515	1	TRUE	FALSE	TRUE	0.0300717	66	0	1	65	C	splice_acceptor_variant&intron_variant	HIGH	F55G11.3	WBGene00014771	transcript	F55G11.3	pseudogene
IV	12970919	CTTACT	[C]	{C, CTTACT}	0.030303	1	FALSE	TRUE	FALSE	0.0592181	66	0	2	64	C	splice_donor_variant&splice_region_variant&intron_variant&non_coding_transcript_exon_variant	HIGH	F55G11.3	WBGene00014771	transcript	F55G11.3	pseudogene
IV	12976461	TGATGGTA	[T]	{TGATGGTA, T}	0.0454545	1	FALSE	TRUE	FALSE	0.0874393	66	0	3	63	T	frameshift_variant	HIGH	dod-17	WBGene00010745	transcript	K10D11.1	protein_coding
IV	12977763	TCTAGTTCAAG	[T]	{TCTAGTTCAAG, T}	0.030303	1	FALSE	TRUE	FALSE	0.0592181	66	0	2	64	T	frameshift_variant	HIGH	dod-17	WBGene00010745	transcript	K10D11.1	protein_coding
IV	12977978	G	[T]	{G, T}	0.0151515	1	TRUE	FALSE	FALSE	0.0300717	66	0	1	65	T	splice_donor_variant&intron_variant	HIGH	dod-17	WBGene00010745	transcript	K10D11.1	protein_coding
IV	12978089	T	[C]	{C, T}	0.030303	1	TRUE	FALSE	TRUE	0.0592181	66	0	2	64	C	splice_donor_variant&intron_variant	HIGH	dod-17	WBGene00010745	transcript	K10D11.1	protein_coding
IV	12979388	G	[A]	{G, A}	0.0151515	1	TRUE	FALSE	TRUE	0.0300717	66	0	1	65	A	splice_donor_variant&intron_variant	HIGH	K10D11.2	WBGene00010746	transcript	K10D11.2	protein_coding
IV	12981186	G	[A]	{G, A}	0.0151515	1	TRUE	FALSE	TRUE	0.0300717	66	0	1	65	A	splice_donor_variant&intron_variant	HIGH	K10D11.2	WBGene00010746	transcript	K10D11.2	protein_coding
IV	12981755	CACTTGTGAAGACCT	[C]	{C, CACTTGTGAAGACCT}	0.030303	1	FALSE	TRUE	FALSE	0.0592181	66	0	2	64	C	frameshift_variant&splice_region_variant	HIGH	K10D11.2	WBGene00010746	transcript	K10D11.2	protein_coding
IV	12984392	TG	[T]	{TG, T}	0.0151515	1	FALSE	TRUE	FALSE	0.0300717	66	0	1	65	T	frameshift_variant	HIGH	K10D11.3	WBGene00010747	transcript	K10D11.3c	protein_coding
IV	12985372	AT	[A]	{AT, A}	0.0454545	1	FALSE	TRUE	FALSE	0.0874393	66	0	3	63	A	frameshift_variant&start_lost	HIGH	K10D11.3	WBGene00010747	transcript	K10D11.3b	protein_coding
IV	12993457	C	[A]	{C, A}	0.0151515	1	TRUE	FALSE	FALSE	0.0300717	66	0	1	65	A	stop_gained	HIGH	K10D11.4	WBGene00010748	transcript	K10D11.4	protein_coding
IV	12993899	CA	[C]	{C, CA}	0.0606061	1	FALSE	TRUE	FALSE	0.114735	66	0	4	62	C	frameshift_variant	HIGH	K10D11.4	WBGene00010748	transcript	K10D11.4	protein_coding
IV	13053378	CA	[C]	{C, CA}	0.0461538	0.984848	FALSE	TRUE	FALSE	0.0887299	65	0	3	62	C	frameshift_variant&splice_region_variant	HIGH	F49E11.7	WBGene00009893	transcript	F49E11.7	protein_coding
IV	13054656	TTCAATG	[T]	{TTCAATG, T}	0.0153846	0.984848	FALSE	TRUE	FALSE	0.0305307	65	0	1	64	T	stop_gained&disruptive_inframe_deletion	HIGH	F49E11.7	WBGene00009893	transcript	F49E11.7	protein_coding
IV	13057977	C	[T]	{C, T}	0.0151515	1	TRUE	FALSE	TRUE	0.0300717	66	0	1	65	T	stop_gained	HIGH	scl-2	WBGene00009895	transcript	F49E11.10a.1	protein_coding
IV	13058025	CTTGG	[C]	{C, CTTGG}	0.0151515	1	FALSE	TRUE	FALSE	0.0300717	66	0	1	65	C	frameshift_variant	HIGH	scl-2	WBGene00009895	transcript	F49E11.10a.1	protein_coding
IV	13058026	TTGGG	[T]	{TTGGG, T}	0.0606061	1	FALSE	TRUE	FALSE	0.114735	66	0	4	62	T	frameshift_variant	HIGH	scl-2	WBGene00009895	transcript	F49E11.10a.1	protein_coding
IV	13058027	TGGGG	[T]	{T, TGGGG}	0.0153846	0.984848	FALSE	TRUE	FALSE	0.0305307	65	0	1	64	T	frameshift_variant	HIGH	scl-2	WBGene00009895	transcript	F49E11.10a.1	protein_coding
IV	13061816	ATAGG	[A]	{ATAGG, A}	0.0454545	1	FALSE	TRUE	FALSE	0.0874393	66	0	3	63	A	splice_donor_variant&splice_region_variant&intron_variant&non_coding_transcript_exon_variant	HIGH	scl-4	WBGene00008026	transcript	C39E9.1	pseudogene
IV	13070582	CAAGCATTGCAA	[C]	{C, CAAGCATTGCAA}	0.030303	1	FALSE	TRUE	FALSE	0.0592181	66	0	2	64	C	frameshift_variant	HIGH	scl-7	WBGene00008029	transcript	C39E9.5	protein_coding
IV	13097252	T	[G]	{G, T}	0.0151515	1	TRUE	FALSE	FALSE	0.0300717	66	0	1	65	G	splice_acceptor_variant&intron_variant	HIGH	dli-1	WBGene00001007	transcript	C39E9.14a.1	protein_coding
IV	13106606	T	[C]	{C, T}	0.0151515	1	TRUE	FALSE	TRUE	0.0300717	66	0	1	65	C	stop_lost	HIGH	rde-11	WBGene00023421	transcript	B0564.11.1	protein_coding
IV	13152626	C	[CTTA]	{C, CTTA}	0.0153846	0.984848	FALSE	TRUE	FALSE	0.0305307	65	0	1	64	CTTA	stop_gained&conservative_inframe_insertion	HIGH	F09E8.2	WBGene00008624	transcript	F09E8.2a	protein_coding
IV	13160884	GTA	[G]	{G, GTA}	0.0151515	1	FALSE	TRUE	FALSE	0.0300717	66	0	1	65	G	splice_donor_variant&splice_region_variant&intron_variant	HIGH	msh-5	WBGene00003421	transcript	F09E8.3a	protein_coding
IV	13166531	G	[T]	{G, T}	0.03125	0.969697	TRUE	FALSE	FALSE	0.0610236	64	0	2	62	T	stop_gained	HIGH	scl-14	WBGene00008625	transcript	F09E8.5	protein_coding
IV	13180361	TTGCAATGAGTTACAATCCAGCA	[T]	{TTGCAATGAGTTACAATCCAGCA, T}	0.0307692	0.984848	FALSE	TRUE	FALSE	0.0601073	65	0	2	63	T	frameshift_variant	HIGH	F58D2.3	WBGene00044978	transcript	F58D2.3	protein_coding
IV	13192236	ACTACTGGAAC	[A]	{ACTACTGGAAC, A}	0.0151515	1	FALSE	TRUE	FALSE	0.0300717	66	0	1	65	A	frameshift_variant	HIGH	F58D2.2	WBGene00010241	transcript	F58D2.2	protein_coding
IV	13195824	C	[A]	{C, A}	0.015625	0.969697	TRUE	FALSE	FALSE	0.0310039	64	0	1	63	A	splice_donor_variant&intron_variant	HIGH	C48D1.1	WBGene00008177	transcript	C48D1.1a	protein_coding
IV	13208658	C	[T]	{C, T}	0.0757576	1	TRUE	FALSE	TRUE	0.141106	66	0	5	61	T	splice_donor_variant&intron_variant	HIGH	C48D1.9	WBGene00194643	transcript	C48D1.9a	protein_coding
IV	13249503	CTG	[C]	{C, CTG}	0.030303	1	FALSE	TRUE	FALSE	0.0592181	66	0	2	64	C	frameshift_variant	HIGH	JC8.7	WBGene00010439	transcript	JC8.7a	protein_coding
IV	13251073	C	[T]	{C, T}	0.0151515	1	TRUE	FALSE	TRUE	0.0300717	66	0	1	65	T	splice_acceptor_variant&intron_variant	HIGH	ttr-51	WBGene00010440	transcript	JC8.8	protein_coding
IV	13285141	CCTTGTTGTTGTT	[CGTTGTTGTT, CATTGTTCTTGTTGTTGTT, CGTTGTT, C]	{CGTTGTT, CATTGTTCTTGTTGTTGTT, CCTTGTTGTTGTT}	0.0227273	1	FALSE	TRUE	FALSE	0.0447606	66	1	1	64	CATTGTTCTTGTTGTTGTT	stop_gained&conservative_inframe_insertion	HIGH	Y67H2A.10	WBGene00013465	transcript	Y67H2A.10a	protein_coding		MODERATE	Y67H2A.10	WBGene00013465	transcript	Y67H2A.10b	protein_coding	8/9	c.1274_1276delAAG	p.Gln425_Gly426delinsArg	1329/2159	1274/1818	425/605		]	[CGTTGTT	disruptive_inframe_deletion	MODERATE	Y67H2A.10	WBGene00013465	transcript	Y67H2A.10b	protein_coding	8/9	c.1271_1276delAACAAG	p.Gln424_Gly426delinsArg	1329/2159
IV	13291774	GC	[G]	{G, GC}	0.0151515	1	FALSE	TRUE	FALSE	0.0300717	66	0	1	65	G	frameshift_variant&splice_region_variant	HIGH	Y67H2A.2	WBGene00013461	transcript	Y67H2A.2a	protein_coding
IV	13291776	CT	[C]	{C, CT}	0.0151515	1	FALSE	TRUE	FALSE	0.0300717	66	0	1	65	C	splice_acceptor_variant&intron_variant	HIGH	Y67H2A.2	WBGene00013461	transcript	Y67H2A.2a	protein_coding
IV	13303848	GTTT	[G, GTT]	{GTT, GTTT, G}	0.106061	1	FALSE	TRUE	FALSE	0.191071	66	0	7	59	G	splice_donor_variant&splice_region_variant&intron_variant	HIGH	Y67H2A.7	WBGene00013464	transcript	Y67H2A.7a	protein_coding		MODIFIER	csn-6	WBGene00000818	transcript	Y67H2A.6a	protein_coding	5/5	c.*176+145delT						]]
IV	13321315	T	[C]	{C, T}	0.0151515	1	TRUE	FALSE	TRUE	0.0300717	66	0	1	65	C	splice_donor_variant&intron_variant	HIGH	Y67H2A.9	WBGene00014941	transcript	Y67H2A.9	pseudogene
IV	13384280	T	[C]	{C, T}	0.0606061	1	TRUE	FALSE	TRUE	0.114735	66	0	4	62	C	splice_donor_variant&intron_variant	HIGH	rab-19	WBGene00004278	transcript	Y62E10A.9.1	protein_coding
IV	13389561	C	[A]	{C, A}	0.0151515	1	TRUE	FALSE	FALSE	0.0300717	66	0	1	65	A	start_lost	HIGH	Y62E10A.13	WBGene00013379	transcript	Y62E10A.13d.2	protein_coding		MODERATE	Y62E10A.13	WBGene00013379	transcript	Y62E10A.13g	protein_coding	3/3	c.660G>T	p.Met220Ile	660/1064	660/858	220/285		]	[A	missense_variant	MODERATE	Y62E10A.13	WBGene00013379	transcript	Y62E10A.13b	protein_coding	4/4	c.642G>T	p.Met214Ile	642/1046
IV	13392635	A	[AT]	{AT, A}	0.0454545	1	FALSE	TRUE	FALSE	0.0874393	66	0	3	63	AT	frameshift_variant	HIGH	Y62E10A.13	WBGene00013379	transcript	Y62E10A.13f	protein_coding
IV	13402827	T	[C]	{C, T}	0.0769231	0.984848	TRUE	FALSE	TRUE	0.143113	65	0	5	60	C	splice_donor_variant&intron_variant	HIGH	cyp-31A5	WBGene00013381	transcript	Y62E10A.15a	protein_coding
IV	13429763	C	[A]	{C, A}	0.0151515	1	TRUE	FALSE	FALSE	0.0300717	66	0	1	65	A	stop_gained	HIGH	K09B11.4	WBGene00010711	transcript	K09B11.4	protein_coding
IV	13429803	CTCAT	[C]	{C, CTCAT}	0.0151515	1	FALSE	TRUE	FALSE	0.0300717	66	0	1	65	C	frameshift_variant	HIGH	K09B11.4	WBGene00010711	transcript	K09B11.4	protein_coding
IV	13513636	C	[A]	{C, A}	0.046875	0.969697	TRUE	FALSE	FALSE	0.0900591	64	0	3	61	A	stop_gained	HIGH	dcap-2	WBGene00003582	transcript	F52G2.1b	protein_coding
IV	13518587	C	[CTGA]	{C, CTGA}	0.0151515	1	FALSE	TRUE	FALSE	0.0300717	66	0	1	65	CTGA	splice_acceptor_variant&intron_variant	HIGH	dcap-2	WBGene00003582	transcript	F52G2.1b	protein_coding
IV	13520787	C	[G]	{C, G}	0.106061	1	TRUE	FALSE	FALSE	0.191071	66	0	7	59	G	start_lost	HIGH	dcap-2	WBGene00003582	transcript	F52G2.1b	protein_coding
IV	13539378	T	[A]	{A, T}	0.0153846	0.984848	TRUE	FALSE	FALSE	0.0305307	65	0	1	64	A	stop_gained	HIGH	rsd-2	WBGene00004681	transcript	F52G2.2a	protein_coding
IV	13548220	C	[G]	{C, G}	0.409091	1	TRUE	FALSE	FALSE	0.487162	66	0	27	39	G	start_lost	HIGH	F52G2.3	WBGene00009943	transcript	F52G2.3	protein_coding
IV	13576543	C	[T]	{C, T}	0.047619	0.954545	TRUE	FALSE	TRUE	0.0914286	63	0	3	60	T	stop_gained	HIGH	srd-10	WBGene00005088	transcript	Y45F10B.14	protein_coding
IV	13578004	A	[G]	{G, A}	0.245902	0.924242	TRUE	FALSE	TRUE	0.373933	61	2	14	45	G	splice_donor_variant&intron_variant	HIGH	Y45F10B.8	WBGene00012872	transcript	Y45F10B.8	protein_coding
IV	13581665	G	[A]	{G, A}	0.046875	0.969697	TRUE	FALSE	TRUE	0.0900591	64	0	3	61	A	stop_gained	HIGH	sru-16	WBGene00005679	transcript	Y45F10B.4.1	protein_coding
IV	13581789	A	[G]	{G, A}	0.03125	0.969697	TRUE	FALSE	TRUE	0.0610236	64	0	2	62	G	splice_acceptor_variant&intron_variant	HIGH	sru-16	WBGene00005679	transcript	Y45F10B.4.1	protein_coding
IV	13582059	C	[T]	{C, T}	0.03125	0.969697	TRUE	FALSE	TRUE	0.0610236	64	0	2	62	T	stop_gained	HIGH	sru-16	WBGene00005679	transcript	Y45F10B.4.1	protein_coding
IV	13588040	T	[C]	{C, T}	0.0151515	1	TRUE	FALSE	TRUE	0.0300717	66	0	1	65	C	splice_donor_variant&intron_variant	HIGH	Y45F10B.12	WBGene00012874	transcript	Y45F10B.12	protein_coding
IV	13589204	TTGCGATA	[T]	{TTGCGATA, T}	0.0454545	1	FALSE	TRUE	FALSE	0.0874393	66	0	3	63	T	frameshift_variant	HIGH	sru-9	WBGene00005672	transcript	Y45F10B.11	protein_coding
IV	13589469	C	[G]	{C, G}	0.0606061	1	TRUE	FALSE	FALSE	0.114735	66	0	4	62	G	stop_gained	HIGH	sru-9	WBGene00005672	transcript	Y45F10B.11	protein_coding
IV	13593651	A	[G]	{G, A}	0.0454545	1	TRUE	FALSE	TRUE	0.0874393	66	0	3	63	G	start_lost	HIGH	Y45F10B.3	WBGene00012871	transcript	Y45F10B.3	protein_coding
IV	13602794	AT	[A]	{AT, A}	0.047619	0.954545	FALSE	TRUE	FALSE	0.0914286	63	0	3	60	A	frameshift_variant	HIGH	Y45F10B.59	WBGene00194917	transcript	Y45F10B.59	protein_coding
IV	13603938	A	[T, G]	{A, T}	0.015625	0.969697	TRUE	FALSE	FALSE	0.0310039	64	0	1	63	G	splice_acceptor_variant&intron_variant	HIGH	Y45F10B.15	WBGene00012876	transcript	Y45F10B.15	pseudogene
IV	13606814	G	[A]	{G, A}	0.0454545	1	TRUE	FALSE	TRUE	0.0874393	66	0	3	63	A	splice_acceptor_variant&intron_variant	HIGH	Y45F10B.18	WBGene00045059	transcript	Y45F10B.18	pseudogene
IV	13620164	TCTATA	[T]	{TCTATA, T}	0.0151515	1	FALSE	TRUE	FALSE	0.0300717	66	0	1	65	T	frameshift_variant	HIGH	C08F11.3	WBGene00007452	transcript	C08F11.3	protein_coding
IV	13620165	CTATAT	[C]	{C, CTATAT}	0.136364	1	FALSE	TRUE	FALSE	0.237335	66	0	9	57	C	frameshift_variant	HIGH	C08F11.3	WBGene00007452	transcript	C08F11.3	protein_coding
IV	13620454	AC	[A]	{AC, A}	0.0153846	0.984848	FALSE	TRUE	FALSE	0.0305307	65	0	1	64	A	frameshift_variant	HIGH	C08F11.3	WBGene00007452	transcript	C08F11.3	protein_coding
IV	13621090	ATGAGATT	[A]	{ATGAGATT, A}	0.0454545	1	FALSE	TRUE	FALSE	0.0874393	66	0	3	63	A	frameshift_variant	HIGH	C08F11.3	WBGene00007452	transcript	C08F11.3	protein_coding
IV	13621481	AAGAAAAG	[A]	{AAGAAAAG, A}	0.0151515	1	FALSE	TRUE	FALSE	0.0300717	66	0	1	65	A	frameshift_variant	HIGH	C08F11.3	WBGene00007452	transcript	C08F11.3	protein_coding
IV	13621484	AAAAGAGC	[A]	{A, AAAAGAGC}	0.0151515	1	FALSE	TRUE	FALSE	0.0300717	66	0	1	65	A	frameshift_variant	HIGH	C08F11.3	WBGene00007452	transcript	C08F11.3	protein_coding
IV	13634016	G	[T]	{G, T}	0.030303	1	TRUE	FALSE	FALSE	0.0592181	66	0	2	64	T	stop_gained	HIGH	fbxa-98	WBGene00007453	transcript	C08F11.5a	protein_coding
IV	13637706	TA	[T]	{TA, T}	0.0153846	0.984848	FALSE	TRUE	FALSE	0.0305307	65	0	1	64	T	frameshift_variant	HIGH	C08F11.7	WBGene00007454	transcript	C08F11.7	protein_coding
IV	13638264	GGT	[G]	{G, GGT}	0.0153846	0.984848	FALSE	TRUE	FALSE	0.0305307	65	0	1	64	G	frameshift_variant	HIGH	C08F11.7	WBGene00007454	transcript	C08F11.7	protein_coding
IV	13638295	T	[A]	{A, T}	0.0153846	0.984848	TRUE	FALSE	FALSE	0.0305307	65	0	1	64	A	splice_donor_variant&intron_variant	HIGH	C08F11.7	WBGene00007454	transcript	C08F11.7	protein_coding
IV	13638444	CACCG	[C]	{C, CACCG}	0.0153846	0.984848	FALSE	TRUE	FALSE	0.0305307	65	0	1	64	C	frameshift_variant	HIGH	C08F11.7	WBGene00007454	transcript	C08F11.7	protein_coding
IV	13638446	CCGAT	[C]	{C, CCGAT}	0.0307692	0.984848	FALSE	TRUE	FALSE	0.0601073	65	0	2	63	C	frameshift_variant	HIGH	C08F11.7	WBGene00007454	transcript	C08F11.7	protein_coding
IV	13644465	A	[C]	{C, A}	0.0151515	1	TRUE	FALSE	FALSE	0.0300717	66	0	1	65	C	stop_lost&splice_region_variant	HIGH	srz-29	WBGene00007456	transcript	C08F11.9	protein_coding
IV	13644782	TA	[T]	{TA, T}	0.0454545	1	FALSE	TRUE	FALSE	0.0874393	66	0	3	63	T	frameshift_variant	HIGH	srz-29	WBGene00007456	transcript	C08F11.9	protein_coding
IV	13644861	G	[GA]	{G, GA}	0.0606061	1	FALSE	TRUE	FALSE	0.114735	66	4	2	60	GA	frameshift_variant	HIGH	srz-29	WBGene00007456	transcript	C08F11.9	protein_coding
IV	13644866	G	[GA]	{G, GA}	0.016129	0.939394	FALSE	TRUE	FALSE	0.0319958	62	0	1	61	GA	frameshift_variant	HIGH	srz-29	WBGene00007456	transcript	C08F11.9	protein_coding
IV	13645066	G	[T]	{G, T}	0.0909091	1	TRUE	FALSE	FALSE	0.166551	66	0	6	60	T	stop_gained	HIGH	srz-29	WBGene00007456	transcript	C08F11.9	protein_coding
IV	13645174	AT	[A]	{AT, A}	0.0151515	1	FALSE	TRUE	FALSE	0.0300717	66	0	1	65	A	frameshift_variant	HIGH	srz-29	WBGene00007456	transcript	C08F11.9	protein_coding
IV	13645638	CA	[C]	{C, CA}	0.0151515	1	FALSE	TRUE	FALSE	0.0300717	66	0	1	65	C	frameshift_variant	HIGH	srz-29	WBGene00007456	transcript	C08F11.9	protein_coding
IV	13645828	AACAAT	[A]	{A, AACAAT}	0.0151515	1	FALSE	TRUE	FALSE	0.0300717	66	0	1	65	A	frameshift_variant	HIGH	srz-29	WBGene00007456	transcript	C08F11.9	protein_coding
IV	13645842	AAATG	[A]	{AAATG, A}	0.0151515	1	FALSE	TRUE	FALSE	0.0300717	66	0	1	65	A	frameshift_variant	HIGH	srz-29	WBGene00007456	transcript	C08F11.9	protein_coding
IV	13648071	A	[C]	{C, A}	0.030303	1	TRUE	FALSE	FALSE	0.0592181	66	0	2	64	C	stop_lost	HIGH	C08F11.10	WBGene00007457	transcript	C08F11.10	protein_coding
IV	13674801	GT	[G]	{G, GT}	0.0307692	0.984848	FALSE	TRUE	FALSE	0.0601073	65	0	2	63	G	frameshift_variant	HIGH	oac-48	WBGene00011960	transcript	T23G4.4	protein_coding
IV	13675485	G	[A]	{G, A}	0.0151515	1	TRUE	FALSE	TRUE	0.0300717	66	0	1	65	A	stop_gained	HIGH	oac-48	WBGene00011960	transcript	T23G4.4	protein_coding
IV	13679203	G	[A]	{G, A}	0.0454545	1	TRUE	FALSE	TRUE	0.0874393	66	0	3	63	A	splice_donor_variant&intron_variant	HIGH	T23G4.5	WBGene00011961	transcript	T23G4.5	protein_coding
IV	13696227	C	[A]	{C, A}	0.121212	1	TRUE	FALSE	FALSE	0.214666	66	0	8	58	A	start_lost	HIGH	T23G4.127	WBGene00219243	transcript	T23G4.127	protein_coding
IV	13715943	TTCATATATCTCTTA	[T]	{TTCATATATCTCTTA, T}	0.030303	1	FALSE	TRUE	FALSE	0.0592181	66	0	2	64	T	frameshift_variant	HIGH	C47A4.1	WBGene00008122	transcript	C47A4.1	protein_coding
IV	13779112	TA	[T]	{TA, T}	0.0454545	1	FALSE	TRUE	FALSE	0.0874393	66	0	3	63	T	frameshift_variant	HIGH	gly-10	WBGene00001635	transcript	Y45F10D.3a	protein_coding
IV	13789078	ATTTTTCAGC	[A, ATTTTTCAGCTTTTTCAGC]	{A, ATTTTTCAGC, ATTTTTCAGCTTTTTCAGC}	0.0530303	1	FALSE	TRUE	FALSE	0.101203	66	1	3	62	A	splice_acceptor_variant&splice_region_variant&5_prime_UTR_variant&intron_variant	HIGH	Y45F10D.7	WBGene00012887	transcript	Y45F10D.7.1	protein_coding	21	MODIFIER	Y45F10D.7	WBGene00012887	transcript	Y45F10D.7.1	protein_coding	2/9	c.-21-8_-21delTTTTTCAGC						]	[A	non_coding_transcript_variant	MODIFIER	Y45F10D.7	WBGene00012887	transcript	Y45F10D.7.2	protein_coding	1/8	c.-29_-21delTTTTTCAGC
[truncated: 84 more columns]

## Sheet: Moderate
CHROM	POS	REF	ALT	allele_set	aaf	call_rate	is_snp	is_indel	is_transition	nucl_diversity	num_called	num_het	num_hom_alt	num_hom_ref	ANN	Mutation type	Impact	Gene name	WBGene ID	Transcript?	Gene ID	Gene Type
IV	12490955	A	[T]	{A, T}	0.0151515	1	TRUE	FALSE	FALSE	0.0300717	66	0	1	65	T	missense_variant	MODERATE	him-6	WBGene00001865	transcript	T04A11.6	protein_coding
IV	12491276	T	[A]	{A, T}	0.030303	1	TRUE	FALSE	FALSE	0.0592181	66	0	2	64	A	missense_variant	MODERATE	him-6	WBGene00001865	transcript	T04A11.6	protein_coding
IV	12491329	C	[CAGA]	{C, CAGA}	0.030303	1	FALSE	TRUE	FALSE	0.0592181	66	0	2	64	CAGA	disruptive_inframe_insertion	MODERATE	him-6	WBGene00001865	transcript	T04A11.6	protein_coding
IV	12494901	A	[G]	{G, A}	0.030303	1	TRUE	FALSE	TRUE	0.0592181	66	0	2	64	G	missense_variant	MODERATE	him-6	WBGene00001865	transcript	T04A11.6	protein_coding
IV	12494922	G	[A]	{G, A}	0.030303	1	TRUE	FALSE	TRUE	0.0592181	66	0	2	64	A	missense_variant	MODERATE	him-6	WBGene00001865	transcript	T04A11.6	protein_coding
IV	12496877	G	[T]	{G, T}	0.0151515	1	TRUE	FALSE	FALSE	0.0300717	66	0	1	65	T	missense_variant&splice_region_variant	MODERATE	sru-20	WBGene00005683	transcript	T04A11.7a	protein_coding
IV	12497627	G	[A]	{G, A}	0.0151515	1	TRUE	FALSE	TRUE	0.0300717	66	0	1	65	A	missense_variant	MODERATE	sru-20	WBGene00005683	transcript	T04A11.7a	protein_coding								z
IV	12497726	G	[A]	{G, A}	0.030303	1	TRUE	FALSE	TRUE	0.0592181	66	0	2	64	A	missense_variant	MODERATE	sru-20	WBGene00005683	transcript	T04A11.7a	protein_coding
IV	12497780	C	[T]	{C, T}	0.0151515	1	TRUE	FALSE	TRUE	0.0300717	66	0	1	65	T	missense_variant	MODERATE	sru-20	WBGene00005683	transcript	T04A11.7a	protein_coding
IV	12499825	A	[T]	{A, T}	0.0151515	1	TRUE	FALSE	FALSE	0.0300717	66	0	1	65	T	missense_variant	MODERATE	sru-19	WBGene00005682	transcript	T04A11.8	protein_coding
IV	12499833	A	[C]	{C, A}	0.0151515	1	TRUE	FALSE	FALSE	0.0300717	66	0	1	65	C	missense_variant	MODERATE	sru-19	WBGene00005682	transcript	T04A11.8	protein_coding
IV	12499834	T	[C]	{C, T}	0.0151515	1	TRUE	FALSE	TRUE	0.0300717	66	0	1	65	C	missense_variant	MODERATE	sru-19	WBGene00005682	transcript	T04A11.8	protein_coding
IV	12500289	T	[C]	{C, T}	0.0153846	0.984848	TRUE	FALSE	TRUE	0.0305307	65	0	1	64	C	missense_variant	MODERATE	sru-19	WBGene00005682	transcript	T04A11.8	protein_coding
IV	12500409	C	[G]	{C, G}	0.015873	0.954545	TRUE	FALSE	FALSE	0.0314921	63	0	1	62	G	missense_variant	MODERATE	sru-19	WBGene00005682	transcript	T04A11.8	protein_coding
IV	12502946	C	[T]	{C, T}	0.030303	1	TRUE	FALSE	TRUE	0.0592181	66	0	2	64	T	missense_variant	MODERATE	sru-18	WBGene00005681	transcript	T04A11.9	protein_coding
IV	12503421	T	[C]	{C, T}	0.03125	0.969697	TRUE	FALSE	TRUE	0.0610236	64	0	2	62	C	missense_variant	MODERATE	sru-18	WBGene00005681	transcript	T04A11.9	protein_coding
IV	12503578	C	[A]	{C, A}	0.0153846	0.984848	TRUE	FALSE	FALSE	0.0305307	65	0	1	64	A	missense_variant	MODERATE	sru-18	WBGene00005681	transcript	T04A11.9	protein_coding
IV	12503639	G	[C]	{C, G}	0.031746	0.954545	TRUE	FALSE	FALSE	0.0619683	63	0	2	61	C	missense_variant&splice_region_variant	MODERATE	sru-18	WBGene00005681	transcript	T04A11.9	protein_coding
IV	12503960	G	[T]	{G, T}	0.0461538	0.984848	TRUE	FALSE	FALSE	0.0887299	65	0	3	62	T	missense_variant	MODERATE	sru-18	WBGene00005681	transcript	T04A11.9	protein_coding
IV	12503978	T	[C]	{C, T}	0.0153846	0.984848	TRUE	FALSE	TRUE	0.0305307	65	0	1	64	C	missense_variant	MODERATE	sru-18	WBGene00005681	transcript	T04A11.9	protein_coding
IV	12503989	T	[A]	{A, T}	0.0153846	0.984848	TRUE	FALSE	FALSE	0.0305307	65	0	1	64	A	missense_variant	MODERATE	sru-18	WBGene00005681	transcript	T04A11.9	protein_coding
IV	12505704	C	[T]	{C, T}	0.015873	0.954545	TRUE	FALSE	TRUE	0.0314921	63	0	1	62	T	missense_variant	MODERATE	sru-17	WBGene00005680	transcript	T04A11.10	protein_coding
IV	12505788	A	[C]	{C, A}	0.171875	0.969697	TRUE	FALSE	FALSE	0.286909	64	0	11	53	C	missense_variant	MODERATE	sru-17	WBGene00005680	transcript	T04A11.10	protein_coding
IV	12506137	ACTTCGC	[A]	{ACTTCGC, A}	0.0153846	0.984848	FALSE	TRUE	FALSE	0.0305307	65	0	1	64	A	disruptive_inframe_deletion	MODERATE	sru-17	WBGene00005680	transcript	T04A11.10	protein_coding
IV	12506164	G	[A]	{G, A}	0.0307692	0.984848	TRUE	FALSE	TRUE	0.0601073	65	0	2	63	A	missense_variant	MODERATE	sru-17	WBGene00005680	transcript	T04A11.10	protein_coding
IV	12506514	A	[T]	{A, T}	0.0153846	0.984848	TRUE	FALSE	FALSE	0.0305307	65	0	1	64	T	missense_variant	MODERATE	sru-17	WBGene00005680	transcript	T04A11.10	protein_coding
IV	12506923	T	[A]	{A, T}	0.0153846	0.984848	TRUE	FALSE	FALSE	0.0305307	65	0	1	64	A	missense_variant	MODERATE	sru-17	WBGene00005680	transcript	T04A11.10	protein_coding
IV	12507229	G	[A]	{G, A}	0.0151515	1	TRUE	FALSE	TRUE	0.0300717	66	0	1	65	A	missense_variant	MODERATE	sru-17	WBGene00005680	transcript	T04A11.10	protein_coding
IV	12507250	G	[A]	{G, A}	0.0151515	1	TRUE	FALSE	TRUE	0.0300717	66	0	1	65	A	missense_variant	MODERATE	sru-17	WBGene00005680	transcript	T04A11.10	protein_coding
IV	12507275	A	[C]	{C, A}	0.030303	1	TRUE	FALSE	FALSE	0.0592181	66	0	2	64	C	missense_variant	MODERATE	sru-17	WBGene00005680	transcript	T04A11.10	protein_coding
IV	12507341	A	[G]	{G, A}	0.0151515	1	TRUE	FALSE	TRUE	0.0300717	66	0	1	65	G	missense_variant	MODERATE	sru-17	WBGene00005680	transcript	T04A11.10	protein_coding
IV	12521559	C	[T]	{C, T}	0.0151515	1	TRUE	FALSE	TRUE	0.0300717	66	0	1	65	T	missense_variant	MODERATE	sru-13	WBGene00005676	transcript	F53B2.4	protein_coding
IV	12522496	A	[T]	{A, T}	0.030303	1	TRUE	FALSE	FALSE	0.0592181	66	0	2	64	T	missense_variant	MODERATE	sru-13	WBGene00005676	transcript	F53B2.4	protein_coding
IV	12524811	G	[T]	{G, T}	0.0151515	1	TRUE	FALSE	FALSE	0.0300717	66	0	1	65	T	missense_variant&splice_region_variant	MODERATE	eak-4	WBGene00009955	transcript	F53B2.3	protein_coding
IV	12526503	G	[A]	{G, A}	0.0757576	1	TRUE	FALSE	TRUE	0.141106	66	0	5	61	A	missense_variant	MODERATE	F53B2.8	WBGene00009957	transcript	F53B2.8	protein_coding
IV	12526512	T	[C]	{C, T}	0.0151515	1	TRUE	FALSE	TRUE	0.0300717	66	0	1	65	C	missense_variant	MODERATE	F53B2.8	WBGene00009957	transcript	F53B2.8	protein_coding
IV	12526593	A	[T]	{A, T}	0.136364	1	TRUE	FALSE	FALSE	0.237335	66	0	9	57	T	missense_variant	MODERATE	F53B2.8	WBGene00009957	transcript	F53B2.8	protein_coding
IV	12526619	C	[T]	{C, T}	0.0151515	1	TRUE	FALSE	TRUE	0.0300717	66	0	1	65	T	missense_variant	MODERATE	F53B2.8	WBGene00009957	transcript	F53B2.8	protein_coding
IV	12526770	CCAGCTTGGATCT	[C]	{C, CCAGCTTGGATCT}	0.0151515	1	FALSE	TRUE	FALSE	0.0300717	66	0	1	65	C	conservative_inframe_deletion	MODERATE	F53B2.8	WBGene00009957	transcript	F53B2.8	protein_coding
IV	12527118	G	[T]	{G, T}	0.0307692	0.984848	TRUE	FALSE	FALSE	0.0601073	65	0	2	63	T	missense_variant	MODERATE	F53B2.8	WBGene00009957	transcript	F53B2.8	protein_coding
IV	12529865	G	[T]	{G, T}	0.0757576	1	TRUE	FALSE	FALSE	0.141106	66	0	5	61	T	missense_variant	MODERATE	F53B2.5	WBGene00009956	transcript	F53B2.5	protein_coding
IV	12530371	T	[A]	{A, T}	0.030303	1	TRUE	FALSE	FALSE	0.0592181	66	0	2	64	A	missense_variant	MODERATE	F53B2.5	WBGene00009956	transcript	F53B2.5	protein_coding
IV	12530589	T	[A]	{A, T}	0.0757576	1	TRUE	FALSE	FALSE	0.141106	66	0	5	61	A	missense_variant	MODERATE	F53B2.5	WBGene00009956	transcript	F53B2.5	protein_coding
IV	12542470	G	[A]	{G, A}	0.0151515	1	TRUE	FALSE	TRUE	0.0300717	66	0	1	65	A	missense_variant	MODERATE	ham-1	WBGene00001820	transcript	F53B2.6	protein_coding
IV	12543472	T	[A]	{A, T}	0.0151515	1	TRUE	FALSE	FALSE	0.0300717	66	0	1	65	A	missense_variant	MODERATE	ham-1	WBGene00001820	transcript	F53B2.6	protein_coding
IV	12543609	A	[T]	{A, T}	0.0151515	1	TRUE	FALSE	FALSE	0.0300717	66	0	1	65	T	missense_variant	MODERATE	ham-1	WBGene00001820	transcript	F53B2.6	protein_coding
IV	12543816	A	[G]	{G, A}	0.121212	1	TRUE	FALSE	TRUE	0.214666	66	0	8	58	G	missense_variant	MODERATE	ham-1	WBGene00001820	transcript	F53B2.6	protein_coding
IV	12544903	C	[T]	{C, T}	0.0151515	1	TRUE	FALSE	TRUE	0.0300717	66	0	1	65	T	missense_variant	MODERATE	ham-1	WBGene00001820	transcript	F53B2.6	protein_coding
IV	12544917	G	[A]	{G, A}	0.0151515	1	TRUE	FALSE	TRUE	0.0300717	66	0	1	65	A	missense_variant	MODERATE	ham-1	WBGene00001820	transcript	F53B2.6	protein_coding
IV	12544969	G	[A]	{G, A}	0.0151515	1	TRUE	FALSE	TRUE	0.0300717	66	0	1	65	A	missense_variant	MODERATE	ham-1	WBGene00001820	transcript	F53B2.6	protein_coding
IV	12545214	C	[G]	{C, G}	0.0151515	1	TRUE	FALSE	FALSE	0.0300717	66	0	1	65	G	missense_variant	MODERATE	ham-1	WBGene00001820	transcript	F53B2.6	protein_coding
IV	12545246	T	[A]	{A, T}	0.0151515	1	TRUE	FALSE	FALSE	0.0300717	66	0	1	65	A	missense_variant	MODERATE	ham-1	WBGene00001820	transcript	F53B2.6	protein_coding
IV	12545310	G	[T]	{G, T}	0.0151515	1	TRUE	FALSE	FALSE	0.0300717	66	0	1	65	T	missense_variant	MODERATE	ham-1	WBGene00001820	transcript	F53B2.6	protein_coding
IV	12557156	CTTTCTCCGA	[C]	{C, CTTTCTCCGA}	0.0151515	1	FALSE	TRUE	FALSE	0.0300717	66	0	1	65	C	conservative_inframe_deletion	MODERATE	ZK795.2	WBGene00014082	transcript	ZK795.2	protein_coding
IV	12557160	CTCCGATTTT	[C]	{CTCCGATTTT, C}	0.106061	1	FALSE	TRUE	FALSE	0.191071	66	0	7	59	C	disruptive_inframe_deletion	MODERATE	ZK795.2	WBGene00014082	transcript	ZK795.2	protein_coding
IV	12557342	G	[T]	{G, T}	0.0454545	1	TRUE	FALSE	FALSE	0.0874393	66	0	3	63	T	missense_variant	MODERATE	ZK795.2	WBGene00014082	transcript	ZK795.2	protein_coding
IV	12558018	T	[C]	{C, T}	0.030303	1	TRUE	FALSE	TRUE	0.0592181	66	0	2	64	C	missense_variant	MODERATE	ZK795.2	WBGene00014082	transcript	ZK795.2	protein_coding
IV	12558756	G	[T]	{G, T}	0.0151515	1	TRUE	FALSE	FALSE	0.0300717	66	0	1	65	T	missense_variant	MODERATE	ZK795.2	WBGene00014082	transcript	ZK795.2	protein_coding
IV	12559465	A	[G]	{G, A}	0.181818	1	TRUE	FALSE	TRUE	0.299792	66	0	12	54	G	missense_variant	MODERATE	ZK795.3	WBGene00014083	transcript	ZK795.3	protein_coding
IV	12560482	G	[A]	{G, A}	0.0151515	1	TRUE	FALSE	TRUE	0.0300717	66	0	1	65	A	missense_variant	MODERATE	ZK795.3	WBGene00014083	transcript	ZK795.3	protein_coding
IV	12560522	A	[G]	{G, A}	0.030303	1	TRUE	FALSE	TRUE	0.0592181	66	0	2	64	G	missense_variant	MODERATE	ZK795.3	WBGene00014083	transcript	ZK795.3	protein_coding
IV	12560539	A	[T]	{A, T}	0.0454545	1	TRUE	FALSE	FALSE	0.0874393	66	0	3	63	T	missense_variant	MODERATE	ZK795.3	WBGene00014083	transcript	ZK795.3	protein_coding
IV	12560898	G	[A]	{G, A}	0.409091	1	TRUE	FALSE	TRUE	0.487162	66	0	27	39	A	missense_variant	MODERATE	snb-7	WBGene00014084	transcript	ZK795.4	protein_coding
IV	12560902	G	[T]	{G, T}	0.0151515	1	TRUE	FALSE	FALSE	0.0300717	66	0	1	65	T	missense_variant	MODERATE	snb-7	WBGene00014084	transcript	ZK795.4	protein_coding
IV	12561006	G	[A]	{G, A}	0.0151515	1	TRUE	FALSE	TRUE	0.0300717	66	0	1	65	A	missense_variant	MODERATE	snb-7	WBGene00014084	transcript	ZK795.4	protein_coding
IV	12561043	C	[T]	{C, T}	0.0151515	1	TRUE	FALSE	TRUE	0.0300717	66	0	1	65	T	missense_variant	MODERATE	snb-7	WBGene00014084	transcript	ZK795.4	protein_coding
IV	12568611	A	[G]	{G, A}	0.0151515	1	TRUE	FALSE	TRUE	0.0300717	66	0	1	65	G	missense_variant	MODERATE	let-99	WBGene00002368	transcript	K08E7.3	protein_coding
IV	12569084	A	[C]	{C, A}	0.0151515	1	TRUE	FALSE	FALSE	0.0300717	66	0	1	65	C	missense_variant	MODERATE	let-99	WBGene00002368	transcript	K08E7.3	protein_coding
IV	12570895	A	[G]	{G, A}	0.0151515	1	TRUE	FALSE	TRUE	0.0300717	66	0	1	65	G	missense_variant	MODERATE	K08E7.4	WBGene00010672	transcript	K08E7.4	protein_coding
IV	12570937	C	[A]	{C, A}	0.0151515	1	TRUE	FALSE	FALSE	0.0300717	66	0	1	65	A	missense_variant	MODERATE	K08E7.4	WBGene00010672	transcript	K08E7.4	protein_coding
IV	12570947	G	[A]	{G, A}	0.0151515	1	TRUE	FALSE	TRUE	0.0300717	66	0	1	65	A	missense_variant	MODERATE	K08E7.4	WBGene00010672	transcript	K08E7.4	protein_coding
IV	12574914	C	[A]	{C, A}	0.0151515	1	TRUE	FALSE	FALSE	0.0300717	66	0	1	65	A	missense_variant	MODERATE	K08E7.5	WBGene00010673	transcript	K08E7.5a	protein_coding
IV	12574976	A	[G]	{G, A}	0.0151515	1	TRUE	FALSE	TRUE	0.0300717	66	0	1	65	G	missense_variant	MODERATE	K08E7.5	WBGene00010673	transcript	K08E7.5a	protein_coding
IV	12576282	C	[T]	{C, T}	0.0151515	1	TRUE	FALSE	TRUE	0.0300717	66	0	1	65	T	missense_variant	MODERATE	K08E7.5	WBGene00010673	transcript	K08E7.5a	protein_coding
IV	12576795	A	[G]	{G, A}	0.0151515	1	TRUE	FALSE	TRUE	0.0300717	66	0	1	65	G	missense_variant	MODERATE	K08E7.5	WBGene00010673	transcript	K08E7.5a	protein_coding
IV	12576931	G	[T]	{G, T}	0.030303	1	TRUE	FALSE	FALSE	0.0592181	66	0	2	64	T	missense_variant	MODERATE	K08E7.5	WBGene00010673	transcript	K08E7.5a	protein_coding
IV	12576956	G	[A]	{G, A}	0.0151515	1	TRUE	FALSE	TRUE	0.0300717	66	0	1	65	A	missense_variant	MODERATE	K08E7.5	WBGene00010673	transcript	K08E7.5a	protein_coding
IV	12577084	C	[G]	{C, G}	0.424242	1	TRUE	FALSE	FALSE	0.492251	66	0	28	38	G	missense_variant	MODERATE	K08E7.5	WBGene00010673	transcript	K08E7.5a	protein_coding
IV	12577087	C	[A]	{C, A}	0.424242	1	TRUE	FALSE	FALSE	0.492251	66	0	28	38	A	missense_variant	MODERATE	K08E7.5	WBGene00010673	transcript	K08E7.5a	protein_coding
IV	12577099	G	[A]	{G, A}	0.0151515	1	TRUE	FALSE	TRUE	0.0300717	66	0	1	65	A	missense_variant	MODERATE	K08E7.5	WBGene00010673	transcript	K08E7.5a	protein_coding
IV	12577754	T	[A]	{A, T}	0.0151515	1	TRUE	FALSE	FALSE	0.0300717	66	0	1	65	A	missense_variant	MODERATE	K08E7.5	WBGene00010673	transcript	K08E7.5a	protein_coding
IV	12578555	C	[A]	{C, A}	0.030303	1	TRUE	FALSE	FALSE	0.0592181	66	0	2	64	A	missense_variant	MODERATE	K08E7.5	WBGene00010673	transcript	K08E7.5a	protein_coding
IV	12578597	C	[G]	{C, G}	0.181818	1	TRUE	FALSE	FALSE	0.299792	66	0	12	54	G	missense_variant	MODERATE	K08E7.5	WBGene00010673	transcript	K08E7.5a	protein_coding
IV	12579063	T	[A]	{A, T}	0.151515	1	TRUE	FALSE	FALSE	0.259079	66	0	10	56	A	missense_variant	MODERATE	K08E7.6	WBGene00010674	transcript	K08E7.6	protein_coding
IV	12579070	T	[A]	{A, T}	0.0151515	1	TRUE	FALSE	FALSE	0.0300717	66	0	1	65	A	missense_variant	MODERATE	K08E7.6	WBGene00010674	transcript	K08E7.6	protein_coding
IV	12580214	C	[T]	{C, T}	0.0151515	1	TRUE	FALSE	TRUE	0.0300717	66	0	1	65	T	missense_variant	MODERATE	K08E7.6	WBGene00010674	transcript	K08E7.6	protein_coding
IV	12585756	A	[G]	{G, A}	0.0151515	1	TRUE	FALSE	TRUE	0.0300717	66	0	1	65	G	missense_variant	MODERATE	K08E7.8	WBGene00010675	transcript	K08E7.8a	protein_coding
IV	12587873	C	[T]	{C, T}	0.424242	1	TRUE	FALSE	TRUE	0.492251	66	0	28	38	T	missense_variant	MODERATE	cul-6	WBGene00000841	transcript	K08E7.7a	protein_coding
IV	12588805	A	[T]	{A, T}	0.0151515	1	TRUE	FALSE	FALSE	0.0300717	66	0	1	65	T	missense_variant	MODERATE	cul-6	WBGene00000841	transcript	K08E7.7a	protein_coding
IV	12588942	T	[G]	{G, T}	0.030303	1	TRUE	FALSE	FALSE	0.0592181	66	0	2	64	G	missense_variant	MODERATE	cul-6	WBGene00000841	transcript	K08E7.7a	protein_coding
IV	12589108	T	[G]	{G, T}	0.227273	1	TRUE	FALSE	FALSE	0.353921	66	0	15	51	G	missense_variant	MODERATE	cul-6	WBGene00000841	transcript	K08E7.7a	protein_coding
IV	12589159	T	[G]	{G, T}	0.0151515	1	TRUE	FALSE	FALSE	0.0300717	66	0	1	65	G	missense_variant	MODERATE	cul-6	WBGene00000841	transcript	K08E7.7a	protein_coding
IV	12589186	C	[T]	{C, T}	0.0454545	1	TRUE	FALSE	TRUE	0.0874393	66	2	2	62	T	missense_variant	MODERATE	cul-6	WBGene00000841	transcript	K08E7.7a	protein_coding
IV	12589278	C	[A]	{C, A}	0.136364	1	TRUE	FALSE	FALSE	0.237335	66	2	8	56	A	missense_variant	MODERATE	cul-6	WBGene00000841	transcript	K08E7.7a	protein_coding
IV	12592746	C	[T]	{C, T}	0.030303	1	TRUE	FALSE	TRUE	0.0592181	66	0	2	64	T	missense_variant	MODERATE	pgp-1	WBGene00003995	transcript	K08E7.9	protein_coding
IV	12593554	C	[A]	{C, A}	0.0151515	1	TRUE	FALSE	FALSE	0.0300717	66	0	1	65	A	missense_variant	MODERATE	pgp-1	WBGene00003995	transcript	K08E7.9	protein_coding
IV	12594854	T	[C]	{C, T}	0.212121	1	TRUE	FALSE	TRUE	0.336803	66	0	14	52	C	missense_variant&splice_region_variant	MODERATE	pgp-1	WBGene00003995	transcript	K08E7.9	protein_coding
IV	12597166	A	[T]	{A, T}	0.0151515	1	TRUE	FALSE	FALSE	0.0300717	66	0	1	65	T	missense_variant&splice_region_variant	MODERATE	pgp-1	WBGene00003995	transcript	K08E7.9	protein_coding
IV	12601857	G	[C]	{C, G}	0.0151515	1	TRUE	FALSE	FALSE	0.0300717	66	0	1	65	C	missense_variant	MODERATE	Y55D9A.2	WBGene00013224	transcript	Y55D9A.2b	protein_coding
IV	12602091	T	[C]	{C, T}	0.0151515	1	TRUE	FALSE	TRUE	0.0300717	66	0	1	65	C	missense_variant	MODERATE	Y55D9A.2	WBGene00013224	transcript	Y55D9A.2b	protein_coding
IV	12602249	GGAA	[G]	{G, GGAA}	0.0454545	1	FALSE	TRUE	FALSE	0.0874393	66	0	3	63	G	disruptive_inframe_deletion&splice_region_variant	MODERATE	Y55D9A.2	WBGene00013224	transcript	Y55D9A.2b	protein_coding
IV	12602618	T	[A]	{A, T}	0.030303	1	TRUE	FALSE	FALSE	0.0592181	66	0	2	64	A	missense_variant	MODERATE	Y55D9A.2	WBGene00013224	transcript	Y55D9A.2b	protein_coding
IV	12604518	C	[T]	{C, T}	0.0151515	1	TRUE	FALSE	TRUE	0.0300717	66	0	1	65	T	missense_variant	MODERATE	Y55D9A.2	WBGene00013224	transcript	Y55D9A.2b	protein_coding
IV	12610021	T	[G]	{G, T}	0.181818	1	TRUE	FALSE	FALSE	0.299792	66	0	12	54	G	missense_variant	MODERATE	efa-6	WBGene00013223	transcript	Y55D9A.1b	protein_coding
IV	12610590	T	[G]	{G, T}	0.0151515	1	TRUE	FALSE	FALSE	0.0300717	66	0	1	65	G	missense_variant	MODERATE	efa-6	WBGene00013223	transcript	Y55D9A.1b	protein_coding
IV	12610938	A	[C]	{C, A}	0.0151515	1	TRUE	FALSE	FALSE	0.0300717	66	0	1	65	C	missense_variant	MODERATE	efa-6	WBGene00013223	transcript	Y55D9A.1b	protein_coding
IV	12611879	C	[T]	{C, T}	0.0151515	1	TRUE	FALSE	TRUE	0.0300717	66	0	1	65	T	missense_variant	MODERATE	efa-6	WBGene00013223	transcript	Y55D9A.1b	protein_coding
IV	12611911	C	[T]	{C, T}	0.0151515	1	TRUE	FALSE	TRUE	0.0300717	66	0	1	65	T	missense_variant	MODERATE	efa-6	WBGene00013223	transcript	Y55D9A.1b	protein_coding
IV	12613441	G	[A]	{G, A}	0.424242	1	TRUE	FALSE	TRUE	0.492251	66	0	28	38	A	missense_variant	MODERATE	efa-6	WBGene00013223	transcript	Y55D9A.1b	protein_coding
IV	12614068	TCTGGGC	[T]	{TCTGGGC, T}	0.030303	1	FALSE	TRUE	FALSE	0.0592181	66	0	2	64	T	conservative_inframe_deletion	MODERATE	efa-6	WBGene00013223	transcript	Y55D9A.1b	protein_coding
IV	12614665	C	[T]	{C, T}	0.0151515	1	TRUE	FALSE	TRUE	0.0300717	66	0	1	65	T	missense_variant	MODERATE	efa-6	WBGene00013223	transcript	Y55D9A.1b	protein_coding
IV	12614670	TCAATGGTGG	[T]	{TCAATGGTGG, T}	0.0151515	1	FALSE	TRUE	FALSE	0.0300717	66	0	1	65	T	disruptive_inframe_deletion	MODERATE	efa-6	WBGene00013223	transcript	Y55D9A.1b	protein_coding
IV	12623160	C	[G]	{C, G}	0.030303	1	TRUE	FALSE	FALSE	0.0592181	66	0	2	64	G	missense_variant	MODERATE	ark-1	WBGene00000186	transcript	C01C7.1a	protein_coding
IV	12623955	G	[A]	{G, A}	0.0151515	1	TRUE	FALSE	TRUE	0.0300717	66	0	1	65	A	missense_variant	MODERATE	ark-1	WBGene00000186	transcript	C01C7.1a	protein_coding
IV	12626534	T	[C]	{C, T}	0.181818	1	TRUE	FALSE	TRUE	0.299792	66	0	12	54	C	missense_variant	MODERATE	ark-1	WBGene00000186	transcript	C01C7.1a	protein_coding
IV	12627833	A	[G]	{G, A}	0.0151515	1	TRUE	FALSE	TRUE	0.0300717	66	0	1	65	G	missense_variant	MODERATE	ark-1	WBGene00000186	transcript	C01C7.1a	protein_coding
IV	12628547	G	[T]	{G, T}	0.030303	1	TRUE	FALSE	FALSE	0.0592181	66	0	2	64	T	missense_variant	MODERATE	ark-1	WBGene00000186	transcript	C01C7.1a	protein_coding
IV	12628549	A	[G]	{G, A}	0.424242	1	TRUE	FALSE	TRUE	0.492251	66	0	28	38	G	missense_variant	MODERATE	ark-1	WBGene00000186	transcript	C01C7.1a	protein_coding
IV	12628571	T	[A]	{A, T}	0.030303	1	TRUE	FALSE	FALSE	0.0592181	66	0	2	64	A	missense_variant	MODERATE	ark-1	WBGene00000186	transcript	C01C7.1a	protein_coding
IV	12640505	A	[G]	{G, A}	0.0151515	1	TRUE	FALSE	TRUE	0.0300717	66	0	1	65	G	missense_variant	MODERATE	vha-7	WBGene00006916	transcript	C26H9A.1b	protein_coding
IV	12646572	C	[T]	{C, T}	0.0151515	1	TRUE	FALSE	TRUE	0.0300717	66	0	1	65	T	missense_variant	MODERATE	vha-7	WBGene00006916	transcript	C26H9A.1b	protein_coding
IV	12646914	C	[CATGAAT]	{C, CATGAAT}	0.0151515	1	FALSE	TRUE	FALSE	0.0300717	66	0	1	65	CATGAAT	conservative_inframe_insertion	MODERATE	vha-7	WBGene00006916	transcript	C26H9A.1b	protein_coding
IV	12648698	A	[T]	{A, T}	0.0151515	1	TRUE	FALSE	FALSE	0.0300717	66	0	1	65	T	missense_variant	MODERATE	vha-7	WBGene00006916	transcript	C26H9A.1b	protein_coding
IV	12650358	G	[A]	{G, A}	0.0454545	1	TRUE	FALSE	TRUE	0.0874393	66	0	3	63	A	missense_variant	MODERATE	vha-7	WBGene00006916	transcript	C26H9A.1b	protein_coding
IV	12653858	A	[G]	{G, A}	0.212121	1	TRUE	FALSE	TRUE	0.336803	66	0	14	52	G	missense_variant	MODERATE	wdfy-3	WBGene00007752	transcript	C26H9A.2c	protein_coding
IV	12655781	G	[A]	{G, A}	0.030303	1	TRUE	FALSE	TRUE	0.0592181	66	0	2	64	A	missense_variant	MODERATE	wdfy-3	WBGene00007752	transcript	C26H9A.2c	protein_coding
IV	12656020	G	[A]	{G, A}	0.0151515	1	TRUE	FALSE	TRUE	0.0300717	66	0	1	65	A	missense_variant	MODERATE	wdfy-3	WBGene00007752	transcript	C26H9A.2c	protein_coding
IV	12656245	T	[C]	{C, T}	0.0151515	1	TRUE	FALSE	TRUE	0.0300717	66	0	1	65	C	missense_variant	MODERATE	wdfy-3	WBGene00007752	transcript	C26H9A.2c	protein_coding
IV	12656903	A	[G]	{G, A}	0.030303	1	TRUE	FALSE	TRUE	0.0592181	66	0	2	64	G	missense_variant	MODERATE	wdfy-3	WBGene00007752	transcript	C26H9A.2c	protein_coding
IV	12659675	T	[G]	{G, T}	0.0757576	1	TRUE	FALSE	FALSE	0.141106	66	0	5	61	G	missense_variant	MODERATE	wdfy-3	WBGene00007752	transcript	C26H9A.2c	protein_coding
IV	12660396	ACAG	[A]	{ACAG, A}	0.0151515	1	FALSE	TRUE	FALSE	0.0300717	66	0	1	65	A	conservative_inframe_deletion	MODERATE	wdfy-3	WBGene00007752	transcript	C26H9A.2c	protein_coding
IV	12660834	G	[C]	{C, G}	0.0151515	1	TRUE	FALSE	FALSE	0.0300717	66	0	1	65	C	missense_variant	MODERATE	wdfy-3	WBGene00007752	transcript	C26H9A.2c	protein_coding
IV	12660873	A	[C]	{C, A}	0.0151515	1	TRUE	FALSE	FALSE	0.0300717	66	0	1	65	C	missense_variant	MODERATE	wdfy-3	WBGene00007752	transcript	C26H9A.2c	protein_coding
IV	12661169	C	[G]	{C, G}	0.212121	1	TRUE	FALSE	FALSE	0.336803	66	0	14	52	G	missense_variant	MODERATE	wdfy-3	WBGene00007752	transcript	C26H9A.2c	protein_coding
IV	12663752	C	[T]	{C, T}	0.0153846	0.984848	TRUE	FALSE	TRUE	0.0305307	65	0	1	64	T	missense_variant	MODERATE	wdfy-3	WBGene00007752	transcript	C26H9A.2c	protein_coding
IV	12664648	T	[G]	{G, T}	0.0153846	0.984848	TRUE	FALSE	FALSE	0.0305307	65	0	1	64	G	missense_variant	MODERATE	wdfy-3	WBGene00007752	transcript	C26H9A.2c	protein_coding
IV	12664667	T	[A]	{A, T}	0.0153846	0.984848	TRUE	FALSE	FALSE	0.0305307	65	0	1	64	A	missense_variant	MODERATE	wdfy-3	WBGene00007752	transcript	C26H9A.2c	protein_coding
IV	12664834	T	[C]	{C, T}	0.0153846	0.984848	TRUE	FALSE	TRUE	0.0305307	65	0	1	64	C	missense_variant	MODERATE	wdfy-3	WBGene00007752	transcript	C26H9A.2c	protein_coding
IV	12665560	G	[A]	{G, A}	0.0153846	0.984848	TRUE	FALSE	TRUE	0.0305307	65	0	1	64	A	missense_variant	MODERATE	wdfy-3	WBGene00007752	transcript	C26H9A.2c	protein_coding
IV	12666860	C	[A]	{C, A}	0.0153846	0.984848	TRUE	FALSE	FALSE	0.0305307	65	0	1	64	A	missense_variant	MODERATE	wdfy-3	WBGene00007752	transcript	C26H9A.2c	protein_coding
IV	12667273	C	[A]	{C, A}	0.0153846	0.984848	TRUE	FALSE	FALSE	0.0305307	65	0	1	64	A	missense_variant	MODERATE	wdfy-3	WBGene00007752	transcript	C26H9A.2c	protein_coding
IV	12673127	A	[G]	{G, A}	0.0153846	0.984848	TRUE	FALSE	TRUE	0.0305307	65	0	1	64	G	missense_variant	MODERATE	wdfy-3	WBGene00007752	transcript	C26H9A.2c	protein_coding
IV	12675252	G	[A]	{G, A}	0.0307692	0.984848	TRUE	FALSE	TRUE	0.0601073	65	0	2	63	A	missense_variant	MODERATE	T23B5.4	WBGene00011941	transcript	T23B5.4b	protein_coding
IV	12675941	G	[A]	{G, A}	0.16129	0.939394	TRUE	FALSE	TRUE	0.272751	62	0	10	52	A	missense_variant	MODERATE	T23B5.4	WBGene00011941	transcript	T23B5.4b	protein_coding
IV	12675945	T	[TAAA]	{TAAA, T}	0.016129	0.939394	FALSE	TRUE	FALSE	0.0319958	62	0	1	61	TAAA	disruptive_inframe_insertion	MODERATE	T23B5.4	WBGene00011941	transcript	T23B5.4b	protein_coding
IV	12681133	C	[T]	{C, T}	0.0625	0.969697	TRUE	FALSE	TRUE	0.11811	64	0	4	60	T	missense_variant	MODERATE	prmt-9	WBGene00011939	transcript	T23B5.1a	protein_coding
IV	12688791	C	[T]	{C, T}	0.0923077	0.984848	TRUE	FALSE	TRUE	0.168873	65	0	6	59	T	missense_variant	MODERATE	T23B5.3	WBGene00011940	transcript	T23B5.3d	protein_coding
IV	12692439	T	[A]	{A, T}	0.0153846	0.984848	TRUE	FALSE	FALSE	0.0305307	65	0	1	64	A	missense_variant	MODERATE	T23B5.3	WBGene00011940	transcript	T23B5.3d	protein_coding
IV	12692551	C	[T]	{C, T}	0.0461538	0.984848	TRUE	FALSE	TRUE	0.0887299	65	0	3	62	T	missense_variant	MODERATE	T23B5.3	WBGene00011940	transcript	T23B5.3d	protein_coding
IV	12693650	T	[A]	{A, T}	0.0153846	0.984848	TRUE	FALSE	FALSE	0.0305307	65	0	1	64	A	missense_variant	MODERATE	T23B5.3	WBGene00011940	transcript	T23B5.3d	protein_coding
IV	12694395	C	[T]	{C, T}	0.0153846	0.984848	TRUE	FALSE	TRUE	0.0305307	65	0	1	64	T	missense_variant	MODERATE	T23B5.3	WBGene00011940	transcript	T23B5.3d	protein_coding
IV	12696964	G	[A]	{G, A}	0.0153846	0.984848	TRUE	FALSE	TRUE	0.0305307	65	0	1	64	A	missense_variant	MODERATE	T23B5.3	WBGene00011940	transcript	T23B5.3d	protein_coding
IV	12697004	C	[T]	{C, T}	0.0153846	0.984848	TRUE	FALSE	TRUE	0.0305307	65	0	1	64	T	missense_variant	MODERATE	T23B5.3	WBGene00011940	transcript	T23B5.3d	protein_coding
IV	12706479	G	[T]	{G, T}	0.0153846	0.984848	TRUE	FALSE	FALSE	0.0305307	65	0	1	64	T	missense_variant	MODERATE	C27D8.4	WBGene00007780	transcript	C27D8.4	protein_coding
IV	12706639	T	[C]	{C, T}	0.0153846	0.984848	TRUE	FALSE	TRUE	0.0305307	65	0	1	64	C	missense_variant	MODERATE	C27D8.4	WBGene00007780	transcript	C27D8.4	protein_coding
IV	12707042	G	[A]	{G, A}	0.0153846	0.984848	TRUE	FALSE	TRUE	0.0305307	65	0	1	64	A	missense_variant	MODERATE	C27D8.3	WBGene00007779	transcript	C27D8.3b	protein_coding
IV	12707065	GGTGGAATTA	[G]	{G, GGTGGAATTA}	0.0769231	0.984848	FALSE	TRUE	FALSE	0.143113	65	0	5	60	G	disruptive_inframe_deletion	MODERATE	C27D8.3	WBGene00007779	transcript	C27D8.3b	protein_coding
IV	12707069	GAATTAGTGA	[G]	{G, GAATTAGTGA}	0.0163934	0.924242	FALSE	TRUE	FALSE	0.0325159	61	0	1	60	G	conservative_inframe_deletion	MODERATE	C27D8.3	WBGene00007779	transcript	C27D8.3b	protein_coding
IV	12710017	T	[C]	{C, T}	0.2	0.984848	TRUE	FALSE	TRUE	0.322481	65	0	13	52	C	missense_variant	MODERATE	C27D8.3	WBGene00007779	transcript	C27D8.3b	protein_coding
IV	12710457	T	[C]	{C, T}	0.0153846	0.984848	TRUE	FALSE	TRUE	0.0305307	65	0	1	64	C	missense_variant	MODERATE	C27D8.3	WBGene00007779	transcript	C27D8.3b	protein_coding
IV	12712854	T	[C]	{C, T}	0.0307692	0.984848	TRUE	FALSE	TRUE	0.0601073	65	0	2	63	C	missense_variant&splice_region_variant	MODERATE	C27D8.2	WBGene00007778	transcript	C27D8.2	protein_coding
IV	12713222	T	[A]	{A, T}	0.215385	0.984848	TRUE	FALSE	FALSE	0.340608	65	0	14	51	A	missense_variant	MODERATE	C27D8.2	WBGene00007778	transcript	C27D8.2	protein_coding
IV	12713376	A	[G]	{G, A}	0.215385	0.984848	TRUE	FALSE	TRUE	0.340608	65	0	14	51	G	missense_variant	MODERATE	C27D8.2	WBGene00007778	transcript	C27D8.2	protein_coding
IV	12713649	T	[C]	{C, T}	0.2	0.984848	TRUE	FALSE	TRUE	0.322481	65	0	13	52	C	missense_variant	MODERATE	C27D8.2	WBGene00007778	transcript	C27D8.2	protein_coding
IV	12713814	C	[T]	{C, T}	0.0153846	0.984848	TRUE	FALSE	TRUE	0.0305307	65	0	1	64	T	missense_variant	MODERATE	C27D8.2	WBGene00007778	transcript	C27D8.2	protein_coding
IV	12714038	C	[G]	{C, G}	0.0461538	0.984848	TRUE	FALSE	FALSE	0.0887299	65	0	3	62	G	missense_variant	MODERATE	C27D8.2	WBGene00007778	transcript	C27D8.2	protein_coding
IV	12714274	A	[G]	{G, A}	0.0307692	0.984848	TRUE	FALSE	TRUE	0.0601073	65	0	2	63	G	missense_variant	MODERATE	C27D8.2	WBGene00007778	transcript	C27D8.2	protein_coding
IV	12714625	G	[C]	{C, G}	0.0153846	0.984848	TRUE	FALSE	FALSE	0.0305307	65	0	1	64	C	missense_variant	MODERATE	C27D8.2	WBGene00007778	transcript	C27D8.2	protein_coding
IV	12720011	A	[G]	{G, A}	0.0307692	0.984848	TRUE	FALSE	TRUE	0.0601073	65	0	2	63	G	missense_variant	MODERATE	T23F6.1	WBGene00011949	transcript	T23F6.1	protein_coding
IV	12720210	G	[T]	{G, T}	0.0153846	0.984848	TRUE	FALSE	FALSE	0.0305307	65	0	1	64	T	missense_variant	MODERATE	T23F6.1	WBGene00011949	transcript	T23F6.1	protein_coding
IV	12721442	A	[C]	{C, A}	0.215385	0.984848	TRUE	FALSE	FALSE	0.340608	65	0	14	51	C	missense_variant	MODERATE	T23F6.2	WBGene00011950	transcript	T23F6.2	protein_coding
IV	12721915	G	[A]	{G, A}	0.0307692	0.984848	TRUE	FALSE	TRUE	0.0601073	65	0	2	63	A	missense_variant	MODERATE	T23F6.2	WBGene00011950	transcript	T23F6.2	protein_coding
IV	12722908	C	[A]	{C, A}	0.0153846	0.984848	TRUE	FALSE	FALSE	0.0305307	65	0	1	64	A	missense_variant	MODERATE	T23F6.2	WBGene00011950	transcript	T23F6.2	protein_coding
IV	12723953	T	[G]	{G, T}	0.153846	0.984848	TRUE	FALSE	FALSE	0.262373	65	0	10	55	G	missense_variant	MODERATE	T23F6.3	WBGene00011951	transcript	T23F6.3a	protein_coding
IV	12723968	T	[C]	{C, T}	0.153846	0.984848	TRUE	FALSE	TRUE	0.262373	65	0	10	55	C	missense_variant	MODERATE	T23F6.3	WBGene00011951	transcript	T23F6.3a	protein_coding
IV	12724197	C	[G]	{C, G}	0.0153846	0.984848	TRUE	FALSE	FALSE	0.0305307	65	0	1	64	G	missense_variant	MODERATE	T23F6.3	WBGene00011951	transcript	T23F6.3a	protein_coding
IV	12724307	T	[G]	{G, T}	0.0153846	0.984848	TRUE	FALSE	FALSE	0.0305307	65	0	1	64	G	missense_variant	MODERATE	T23F6.3	WBGene00011951	transcript	T23F6.3a	protein_coding
IV	12728038	G	[A]	{G, A}	0.0153846	0.984848	TRUE	FALSE	TRUE	0.0305307	65	0	1	64	A	missense_variant	MODERATE	rbd-1	WBGene00004315	transcript	T23F6.4a.1	protein_coding
IV	12728363	C	[T]	{C, T}	0.0153846	0.984848	TRUE	FALSE	TRUE	0.0305307	65	0	1	64	T	missense_variant	MODERATE	rbd-1	WBGene00004315	transcript	T23F6.4a.1	protein_coding
IV	12729351	C	[A]	{C, A}	0.0461538	0.984848	TRUE	FALSE	FALSE	0.0887299	65	0	3	62	A	missense_variant	MODERATE	rbd-1	WBGene00004315	transcript	T23F6.4a.1	protein_coding
IV	12729937	G	[C]	{C, G}	0.0461538	0.984848	TRUE	FALSE	FALSE	0.0887299	65	0	3	62	C	missense_variant	MODERATE	rbd-1	WBGene00004315	transcript	T23F6.4a.1	protein_coding
IV	12735580	C	[T]	{C, T}	0.031746	0.954545	TRUE	FALSE	TRUE	0.0619683	63	0	2	61	T	missense_variant	MODERATE	T23F6.5	WBGene00011952	transcript	T23F6.5	protein_coding
IV	12736398	A	[G]	{G, A}	0.469697	1	TRUE	FALSE	TRUE	0.501966	66	0	31	35	G	missense_variant	MODERATE	T23F6.5	WBGene00011952	transcript	T23F6.5	protein_coding
IV	12737091	C	[T]	{C, T}	0.0454545	1	TRUE	FALSE	TRUE	0.0874393	66	0	3	63	T	missense_variant	MODERATE	T23F6.5	WBGene00011952	transcript	T23F6.5	protein_coding
IV	12737957	T	[C]	{C, T}	0.0151515	1	TRUE	FALSE	TRUE	0.0300717	66	0	1	65	C	missense_variant	MODERATE	T23F6.5	WBGene00011952	transcript	T23F6.5	protein_coding
IV	12738003	G	[T]	{G, T}	0.0454545	1	TRUE	FALSE	FALSE	0.0874393	66	0	3	63	T	missense_variant&splice_region_variant	MODERATE	T23F6.5	WBGene00011952	transcript	T23F6.5	protein_coding
IV	12738094	A	[T]	{A, T}	0.121212	1	TRUE	FALSE	FALSE	0.214666	66	0	8	58	T	missense_variant	MODERATE	T23F6.5	WBGene00011952	transcript	T23F6.5	protein_coding
IV	12738347	T	[A]	{A, T}	0.121212	1	TRUE	FALSE	FALSE	0.214666	66	0	8	58	A	missense_variant	MODERATE	T23F6.5	WBGene00011952	transcript	T23F6.5	protein_coding
IV	12743716	C	[T]	{C, T}	0.0151515	1	TRUE	FALSE	TRUE	0.0300717	66	0	1	65	T	missense_variant	MODERATE	C36H8.1	WBGene00007987	transcript	C36H8.1	protein_coding
IV	12743942	G	[T]	{G, T}	0.030303	1	TRUE	FALSE	FALSE	0.0592181	66	0	2	64	T	missense_variant	MODERATE	C36H8.1	WBGene00007987	transcript	C36H8.1	protein_coding
IV	12744002	C	[T]	{C, T}	0.0757576	1	TRUE	FALSE	TRUE	0.141106	66	0	5	61	T	missense_variant	MODERATE	C36H8.1	WBGene00007987	transcript	C36H8.1	protein_coding
IV	12744720	C	[A]	{C, A}	0.0454545	1	TRUE	FALSE	FALSE	0.0874393	66	0	3	63	A	missense_variant	MODERATE	C36H8.1	WBGene00007987	transcript	C36H8.1	protein_coding
IV	12744732	C	[G]	{C, G}	0.0454545	1	TRUE	FALSE	FALSE	0.0874393	66	0	3	63	G	missense_variant	MODERATE	C36H8.1	WBGene00007987	transcript	C36H8.1	protein_coding
IV	12748902	A	[G]	{G, A}	0.469697	1	TRUE	FALSE	TRUE	0.501966	66	0	31	35	G	missense_variant	MODERATE	inx-6	WBGene00002128	transcript	C36H8.2	protein_coding
IV	12749491	A	[G]	{G, A}	0.030303	1	TRUE	FALSE	TRUE	0.0592181	66	0	2	64	G	missense_variant	MODERATE	inx-6	WBGene00002128	transcript	C36H8.2	protein_coding
IV	12765822	T	[C]	{C, T}	0.0151515	1	TRUE	FALSE	TRUE	0.0300717	66	0	1	65	C	missense_variant	MODERATE	ZK897.10	WBGene00206520	transcript	ZK897.10b	protein_coding
IV	12774335	C	[A]	{C, A}	0.0151515	1	TRUE	FALSE	FALSE	0.0300717	66	0	1	65	A	missense_variant	MODERATE	unc-31	WBGene00006767	transcript	ZK897.1j	protein_coding
IV	12776133	T	[C]	{C, T}	0.19697	1	TRUE	FALSE	TRUE	0.31876	66	0	13	53	C	missense_variant	MODERATE	unc-31	WBGene00006767	transcript	ZK897.1j	protein_coding
IV	12776138	T	[C]	{C, T}	0.0151515	1	TRUE	FALSE	TRUE	0.0300717	66	0	1	65	C	missense_variant	MODERATE	unc-31	WBGene00006767	transcript	ZK897.1j	protein_coding
IV	12785788	C	[G]	{C, G}	0.0151515	1	TRUE	FALSE	FALSE	0.0300717	66	0	1	65	G	missense_variant	MODERATE	unc-31	WBGene00006767	transcript	ZK897.1j	protein_coding
IV	12789992	C	[A]	{C, A}	0.0757576	1	TRUE	FALSE	FALSE	0.141106	66	0	5	61	A	missense_variant	MODERATE	F07C6.3	WBGene00008554	transcript	F07C6.3	protein_coding
IV	12791556	T	[C]	{C, T}	0.030303	1	TRUE	FALSE	TRUE	0.0592181	66	0	2	64	C	missense_variant	MODERATE	F07C6.2	WBGene00008553	transcript	F07C6.2	protein_coding
IV	12793029	A	[T]	{A, T}	0.0151515	1	TRUE	FALSE	FALSE	0.0300717	66	0	1	65	T	missense_variant	MODERATE	F07C6.6	WBGene00045067	transcript	F07C6.6	protein_coding
IV	12793065	C	[T]	{C, T}	0.19697	1	TRUE	FALSE	TRUE	0.31876	66	0	13	53	T	missense_variant	MODERATE	F07C6.6	WBGene00045067	transcript	F07C6.6	protein_coding
IV	12794757	A	[G]	{G, A}	0.030303	1	TRUE	FALSE	TRUE	0.0592181	66	0	2	64	G	missense_variant	MODERATE	pin-2	WBGene00004030	transcript	F07C6.1a	protein_coding
IV	12795141	A	[G]	{G, A}	0.0454545	1	TRUE	FALSE	TRUE	0.0874393	66	0	3	63	G	missense_variant	MODERATE	pin-2	WBGene00004030	transcript	F07C6.1a	protein_coding
IV	12808946	A	[T]	{A, T}	0.0151515	1	TRUE	FALSE	FALSE	0.0300717	66	0	1	65	T	missense_variant	MODERATE	F07C6.4	WBGene00008555	transcript	F07C6.4d	protein_coding
IV	12808995	A	[T]	{A, T}	0.0454545	1	TRUE	FALSE	FALSE	0.0874393	66	0	3	63	T	missense_variant	MODERATE	F07C6.4	WBGene00008555	transcript	F07C6.4d	protein_coding
IV	12810123	T	[C]	{C, T}	0.0461538	0.984848	TRUE	FALSE	TRUE	0.0887299	65	0	3	62	C	missense_variant	MODERATE	F07C6.4	WBGene00008555	transcript	F07C6.4d	protein_coding
IV	12812856	C	[A]	{C, A}	0.0151515	1	TRUE	FALSE	FALSE	0.0300717	66	0	1	65	A	missense_variant	MODERATE	F07C6.4	WBGene00008555	transcript	F07C6.4a	protein_coding
IV	12823472	C	[T]	{C, T}	0.0909091	1	TRUE	FALSE	TRUE	0.166551	66	0	6	60	T	missense_variant	MODERATE	F07C6.4	WBGene00008555	transcript	F07C6.4d	protein_coding
IV	12823573	A	[T]	{A, T}	0.166667	1	TRUE	FALSE	FALSE	0.279898	66	0	11	55	T	missense_variant	MODERATE	F07C6.4	WBGene00008555	transcript	F07C6.4d	protein_coding
IV	12823648	C	[A]	{C, A}	0.0151515	1	TRUE	FALSE	FALSE	0.0300717	66	0	1	65	A	missense_variant	MODERATE	F07C6.4	WBGene00008555	transcript	F07C6.4d	protein_coding
IV	12823901	C	[T]	{C, T}	0.0151515	1	TRUE	FALSE	TRUE	0.0300717	66	0	1	65	T	missense_variant	MODERATE	M02B1.4	WBGene00010829	transcript	M02B1.4	protein_coding
IV	12824018	T	[A]	{A, T}	0.0151515	1	TRUE	FALSE	FALSE	0.0300717	66	0	1	65	A	missense_variant	MODERATE	M02B1.4	WBGene00010829	transcript	M02B1.4	protein_coding
IV	12824099	G	[A]	{G, A}	0.166667	1	TRUE	FALSE	TRUE	0.279898	66	0	11	55	A	missense_variant	MODERATE	M02B1.4	WBGene00010829	transcript	M02B1.4	protein_coding
IV	12824349	C	[G]	{C, G}	0.0151515	1	TRUE	FALSE	FALSE	0.0300717	66	0	1	65	G	missense_variant	MODERATE	M02B1.4	WBGene00010829	transcript	M02B1.4	protein_coding
IV	12824612	A	[T]	{A, T}	0.0151515	1	TRUE	FALSE	FALSE	0.0300717	66	0	1	65	T	missense_variant	MODERATE	M02B1.4	WBGene00010829	transcript	M02B1.4	protein_coding
IV	12824804	G	[A]	{G, A}	0.030303	1	TRUE	FALSE	TRUE	0.0592181	66	0	2	64	A	missense_variant	MODERATE	M02B1.4	WBGene00010829	transcript	M02B1.4	protein_coding
IV	12826795	C	[T]	{C, T}	0.0151515	1	TRUE	FALSE	TRUE	0.0300717	66	0	1	65	T	missense_variant	MODERATE	F07C6.4	WBGene00008555	transcript	F07C6.4e	protein_coding
IV	12826846	G	[A]	{G, A}	0.0151515	1	TRUE	FALSE	TRUE	0.0300717	66	0	1	65	A	missense_variant	MODERATE	F07C6.4	WBGene00008555	transcript	F07C6.4e	protein_coding
IV	12846046	T	[C]	{C, T}	0.0909091	1	TRUE	FALSE	TRUE	0.166551	66	0	6	60	C	missense_variant	MODERATE	M02B1.2	WBGene00010827	transcript	M02B1.2.1	protein_coding
IV	12846092	A	[T]	{A, T}	0.0909091	1	TRUE	FALSE	FALSE	0.166551	66	0	6	60	T	missense_variant	MODERATE	M02B1.2	WBGene00010827	transcript	M02B1.2.1	protein_coding
IV	12846729	A	[C]	{C, A}	0.0151515	1	TRUE	FALSE	FALSE	0.0300717	66	0	1	65	C	missense_variant	MODERATE	M02B1.2	WBGene00010827	transcript	M02B1.2.1	protein_coding
IV	12849532	G	[A]	{G, A}	0.30303	1	TRUE	FALSE	TRUE	0.42563	66	0	20	46	A	missense_variant	MODERATE	srf-3	WBGene00005153	transcript	M02B1.1a	protein_coding
IV	12849564	T	[A]	{A, T}	0.151515	1	TRUE	FALSE	FALSE	0.259079	66	0	10	56	A	missense_variant	MODERATE	srf-3	WBGene00005153	transcript	M02B1.1a	protein_coding
IV	12849570	C	[A]	{C, A}	0.0151515	1	TRUE	FALSE	FALSE	0.0300717	66	0	1	65	A	missense_variant	MODERATE	srf-3	WBGene00005153	transcript	M02B1.1a	protein_coding
IV	12850633	T	[G]	{G, T}	0.0909091	1	TRUE	FALSE	FALSE	0.166551	66	0	6	60	G	missense_variant	MODERATE	srf-3	WBGene00005153	transcript	M02B1.1a	protein_coding
IV	12855812	C	[T]	{C, T}	0.030303	1	TRUE	FALSE	TRUE	0.0592181	66	0	2	64	T	missense_variant	MODERATE	nstp-5	WBGene00014139	transcript	ZK896.9a	protein_coding
IV	12856453	G	[A]	{G, A}	0.030303	1	TRUE	FALSE	TRUE	0.0592181	66	0	2	64	A	missense_variant	MODERATE	nstp-5	WBGene00014139	transcript	ZK896.9a	protein_coding
IV	12857892	T	[G]	{G, T}	0.0757576	1	TRUE	FALSE	FALSE	0.141106	66	0	5	61	G	missense_variant	MODERATE	nstp-5	WBGene00014139	transcript	ZK896.9a	protein_coding
IV	12859237	T	[C]	{C, T}	0.0757576	1	TRUE	FALSE	TRUE	0.141106	66	0	5	61	C	missense_variant	MODERATE	nstp-5	WBGene00014139	transcript	ZK896.9a	protein_coding
IV	12859364	G	[A]	{G, A}	0.0757576	1	TRUE	FALSE	TRUE	0.141106	66	0	5	61	A	missense_variant	MODERATE	nstp-5	WBGene00014139	transcript	ZK896.9a	protein_coding
IV	12860269	G	[A]	{G, A}	0.0454545	1	TRUE	FALSE	TRUE	0.0874393	66	0	3	63	A	missense_variant	MODERATE	gcy-18	WBGene00001543	transcript	ZK896.8	protein_coding
IV	12861537	G	[A]	{G, A}	0.0606061	1	TRUE	FALSE	TRUE	0.114735	66	0	4	62	A	missense_variant	MODERATE	gcy-18	WBGene00001543	transcript	ZK896.8	protein_coding
IV	12861876	G	[A]	{G, A}	0.0151515	1	TRUE	FALSE	TRUE	0.0300717	66	0	1	65	A	missense_variant	MODERATE	gcy-18	WBGene00001543	transcript	ZK896.8	protein_coding
IV	12861941	G	[A]	{G, A}	0.0757576	1	TRUE	FALSE	TRUE	0.141106	66	0	5	61	A	missense_variant	MODERATE	gcy-18	WBGene00001543	transcript	ZK896.8	protein_coding
IV	12861989	A	[G]	{G, A}	0.0454545	1	TRUE	FALSE	TRUE	0.0874393	66	0	3	63	G	missense_variant	MODERATE	gcy-18	WBGene00001543	transcript	ZK896.8	protein_coding
IV	12862140	A	[G]	{G, A}	0.0606061	1	TRUE	FALSE	TRUE	0.114735	66	0	4	62	G	missense_variant	MODERATE	gcy-18	WBGene00001543	transcript	ZK896.8	protein_coding
IV	12862143	A	[G]	{G, A}	0.0606061	1	TRUE	FALSE	TRUE	0.114735	66	0	4	62	G	missense_variant	MODERATE	gcy-18	WBGene00001543	transcript	ZK896.8	protein_coding
IV	12862204	T	[C]	{C, T}	0.0757576	1	TRUE	FALSE	TRUE	0.141106	66	0	5	61	C	missense_variant	MODERATE	gcy-18	WBGene00001543	transcript	ZK896.8	protein_coding
IV	12862357	A	[T]	{A, T}	0.0454545	1	TRUE	FALSE	FALSE	0.0874393	66	0	3	63	T	missense_variant	MODERATE	gcy-18	WBGene00001543	transcript	ZK896.8	protein_coding
IV	12862520	T	[A]	{A, T}	0.0757576	1	TRUE	FALSE	FALSE	0.141106	66	0	5	61	A	missense_variant	MODERATE	gcy-18	WBGene00001543	transcript	ZK896.8	protein_coding
IV	12862817	T	[C]	{C, T}	0.0151515	1	TRUE	FALSE	TRUE	0.0300717	66	0	1	65	C	missense_variant	MODERATE	gcy-18	WBGene00001543	transcript	ZK896.8	protein_coding
IV	12862867	A	[C]	{C, A}	0.0151515	1	TRUE	FALSE	FALSE	0.0300717	66	0	1	65	C	missense_variant	MODERATE	gcy-18	WBGene00001543	transcript	ZK896.8	protein_coding
IV	12862946	T	[A]	{A, T}	0.0151515	1	TRUE	FALSE	FALSE	0.0300717	66	0	1	65	A	missense_variant	MODERATE	gcy-18	WBGene00001543	transcript	ZK896.8	protein_coding
IV	12862947	G	[T]	{G, T}	0.0151515	1	TRUE	FALSE	FALSE	0.0300717	66	0	1	65	T	missense_variant	MODERATE	gcy-18	WBGene00001543	transcript	ZK896.8	protein_coding
IV	12863081	A	[G]	{G, A}	0.0606061	1	TRUE	FALSE	TRUE	0.114735	66	0	4	62	G	missense_variant	MODERATE	gcy-18	WBGene00001543	transcript	ZK896.8	protein_coding
IV	12863221	C	[A]	{C, A}	0.030303	1	TRUE	FALSE	FALSE	0.0592181	66	0	2	64	A	missense_variant	MODERATE	gcy-18	WBGene00001543	transcript	ZK896.8	protein_coding
IV	12863580	A	[G, T]	{G, A}	0.0606061	1	TRUE	FALSE	FALSE	0.114735	66	0	4	62	G	missense_variant	MODERATE	gcy-18	WBGene00001543	transcript	ZK896.8	protein_coding
IV	12863662	A	[G]	{G, A}	0.0757576	1	TRUE	FALSE	TRUE	0.141106	66	0	5	61	G	missense_variant	MODERATE	gcy-18	WBGene00001543	transcript	ZK896.8	protein_coding
IV	12863758	G	[C]	{C, G}	0.0454545	1	TRUE	FALSE	FALSE	0.0874393	66	0	3	63	C	missense_variant	MODERATE	gcy-18	WBGene00001543	transcript	ZK896.8	protein_coding
IV	12863825	G	[T]	{G, T}	0.0151515	1	TRUE	FALSE	FALSE	0.0300717	66	0	1	65	T	missense_variant	MODERATE	gcy-18	WBGene00001543	transcript	ZK896.8	protein_coding
IV	12864147	A	[C]	{C, A}	0.151515	1	TRUE	FALSE	FALSE	0.259079	66	0	10	56	C	missense_variant	MODERATE	gcy-18	WBGene00001543	transcript	ZK896.8	protein_coding
IV	12864269	G	[A]	{G, A}	0.151515	1	TRUE	FALSE	TRUE	0.259079	66	0	10	56	A	missense_variant	MODERATE	gcy-18	WBGene00001543	transcript	ZK896.8	protein_coding
IV	12864450	C	[A]	{C, A}	0.0606061	1	TRUE	FALSE	FALSE	0.114735	66	0	4	62	A	missense_variant	MODERATE	gcy-18	WBGene00001543	transcript	ZK896.8	protein_coding
IV	12864829	C	[T]	{C, T}	0.0606061	1	TRUE	FALSE	TRUE	0.114735	66	0	4	62	T	missense_variant	MODERATE	gcy-18	WBGene00001543	transcript	ZK896.8	protein_coding
IV	12864848	A	[G]	{G, A}	0.0151515	1	TRUE	FALSE	TRUE	0.0300717	66	0	1	65	G	missense_variant	MODERATE	gcy-18	WBGene00001543	transcript	ZK896.8	protein_coding
IV	12865208	A	[G]	{G, A}	0.0757576	1	TRUE	FALSE	TRUE	0.141106	66	0	5	61	G	missense_variant	MODERATE	gcy-18	WBGene00001543	transcript	ZK896.8	protein_coding
IV	12865210	T	[C]	{C, T}	0.454545	1	TRUE	FALSE	TRUE	0.499653	66	0	30	36	C	missense_variant	MODERATE	gcy-18	WBGene00001543	transcript	ZK896.8	protein_coding
IV	12865320	C	[A]	{C, A}	0.0606061	1	TRUE	FALSE	FALSE	0.114735	66	0	4	62	A	missense_variant	MODERATE	gcy-18	WBGene00001543	transcript	ZK896.8	protein_coding
IV	12865361	G	[C]	{C, G}	0.212121	1	TRUE	FALSE	FALSE	0.336803	66	0	14	52	C	missense_variant	MODERATE	gcy-18	WBGene00001543	transcript	ZK896.8	protein_coding
IV	12865531	A	[G]	{G, A}	0.0757576	1	TRUE	FALSE	TRUE	0.141106	66	0	5	61	G	missense_variant	MODERATE	gcy-18	WBGene00001543	transcript	ZK896.8	protein_coding
IV	12865538	G	[A]	{G, A}	0.0757576	1	TRUE	FALSE	TRUE	0.141106	66	0	5	61	A	missense_variant	MODERATE	gcy-18	WBGene00001543	transcript	ZK896.8	protein_coding
IV	12866240	G	[A]	{G, A}	0.0757576	1	TRUE	FALSE	TRUE	0.141106	66	0	5	61	A	missense_variant	MODERATE	clec-186	WBGene00014138	transcript	ZK896.7	protein_coding
IV	12866251	A	[C]	{C, A}	0.0454545	1	TRUE	FALSE	FALSE	0.0874393	66	0	3	63	C	missense_variant	MODERATE	clec-186	WBGene00014138	transcript	ZK896.7	protein_coding
IV	12866852	G	[A]	{G, A}	0.0151515	1	TRUE	FALSE	TRUE	0.0300717	66	0	1	65	A	missense_variant	MODERATE	clec-186	WBGene00014138	transcript	ZK896.7	protein_coding
IV	12866891	C	[T]	{C, T}	0.0606061	1	TRUE	FALSE	TRUE	0.114735	66	0	4	62	T	missense_variant	MODERATE	clec-186	WBGene00014138	transcript	ZK896.7	protein_coding
IV	12867206	T	[G]	{G, T}	0.0606061	1	TRUE	FALSE	FALSE	0.114735	66	0	4	62	G	missense_variant	MODERATE	clec-186	WBGene00014138	transcript	ZK896.7	protein_coding
IV	12867281	C	[A]	{C, A}	0.0606061	1	TRUE	FALSE	FALSE	0.114735	66	0	4	62	A	missense_variant	MODERATE	clec-186	WBGene00014138	transcript	ZK896.7	protein_coding
IV	12867348	C	[T]	{C, T}	0.0606061	1	TRUE	FALSE	TRUE	0.114735	66	0	4	62	T	missense_variant	MODERATE	clec-186	WBGene00014138	transcript	ZK896.7	protein_coding
IV	12867362	A	[G]	{G, A}	0.0606061	1	TRUE	FALSE	TRUE	0.114735	66	0	4	62	G	missense_variant	MODERATE	clec-186	WBGene00014138	transcript	ZK896.7	protein_coding
IV	12867411	G	[C]	{C, G}	0.0606061	1	TRUE	FALSE	FALSE	0.114735	66	0	4	62	C	missense_variant	MODERATE	clec-186	WBGene00014138	transcript	ZK896.7	protein_coding
IV	12867414	A	[C]	{C, A}	0.0606061	1	TRUE	FALSE	FALSE	0.114735	66	0	4	62	C	missense_variant	MODERATE	clec-186	WBGene00014138	transcript	ZK896.7	protein_coding
IV	12867459	C	[T]	{C, T}	0.0151515	1	TRUE	FALSE	TRUE	0.0300717	66	0	1	65	T	missense_variant	MODERATE	clec-186	WBGene00014138	transcript	ZK896.7	protein_coding
IV	12867474	C	[G]	{C, G}	0.0606061	1	TRUE	FALSE	FALSE	0.114735	66	0	4	62	G	missense_variant	MODERATE	clec-186	WBGene00014138	transcript	ZK896.7	protein_coding
IV	12867494	C	[T]	{C, T}	0.0151515	1	TRUE	FALSE	TRUE	0.0300717	66	0	1	65	T	missense_variant	MODERATE	clec-186	WBGene00014138	transcript	ZK896.7	protein_coding
IV	12867679	C	[G]	{C, G}	0.0606061	1	TRUE	FALSE	FALSE	0.114735	66	0	4	62	G	missense_variant&splice_region_variant	MODERATE	clec-186	WBGene00014138	transcript	ZK896.7	protein_coding
IV	12867824	A	[G]	{G, A}	0.0606061	1	TRUE	FALSE	TRUE	0.114735	66	0	4	62	G	missense_variant	MODERATE	clec-186	WBGene00014138	transcript	ZK896.7	protein_coding
IV	12868721	G	[A]	{G, A}	0.0909091	1	TRUE	FALSE	TRUE	0.166551	66	0	6	60	A	missense_variant	MODERATE	clec-186	WBGene00014138	transcript	ZK896.7	protein_coding
IV	12868784	A	[G]	{G, A}	0.454545	1	TRUE	FALSE	TRUE	0.499653	66	0	30	36	G	missense_variant	MODERATE	clec-186	WBGene00014138	transcript	ZK896.7	protein_coding
IV	12868828	G	[C]	{C, G}	0.0909091	1	TRUE	FALSE	FALSE	0.166551	66	0	6	60	C	missense_variant	MODERATE	clec-186	WBGene00014138	transcript	ZK896.7	protein_coding
IV	12868992	C	[A]	{C, A}	0.0909091	1	TRUE	FALSE	FALSE	0.166551	66	0	6	60	A	missense_variant	MODERATE	clec-186	WBGene00014138	transcript	ZK896.7	protein_coding
IV	12869364	A	[C]	{C, A}	0.0909091	1	TRUE	FALSE	FALSE	0.166551	66	0	6	60	C	missense_variant	MODERATE	clec-187	WBGene00014137	transcript	ZK896.6	protein_coding
IV	12869744	A	[T]	{A, T}	0.0909091	1	TRUE	FALSE	FALSE	0.166551	66	0	6	60	T	missense_variant	MODERATE	clec-187	WBGene00014137	transcript	ZK896.6	protein_coding
IV	12869846	C	[T]	{C, T}	0.151515	1	TRUE	FALSE	TRUE	0.259079	66	0	10	56	T	missense_variant	MODERATE	clec-187	WBGene00014137	transcript	ZK896.6	protein_coding
IV	12870156	G	[A]	{G, A}	0.0909091	1	TRUE	FALSE	TRUE	0.166551	66	0	6	60	A	missense_variant	MODERATE	clec-187	WBGene00014137	transcript	ZK896.6	protein_coding
IV	12870192	T	[C]	{C, T}	0.0909091	1	TRUE	FALSE	TRUE	0.166551	66	0	6	60	C	missense_variant	MODERATE	clec-187	WBGene00014137	transcript	ZK896.6	protein_coding
IV	12870247	C	[T]	{C, T}	0.0909091	1	TRUE	FALSE	TRUE	0.166551	66	0	6	60	T	missense_variant	MODERATE	clec-187	WBGene00014137	transcript	ZK896.6	protein_coding
IV	12870270	T	[A]	{A, T}	0.0909091	1	TRUE	FALSE	FALSE	0.166551	66	0	6	60	A	missense_variant	MODERATE	clec-187	WBGene00014137	transcript	ZK896.6	protein_coding
IV	12870356	C	[A]	{C, A}	0.0909091	1	TRUE	FALSE	FALSE	0.166551	66	0	6	60	A	missense_variant	MODERATE	clec-187	WBGene00014137	transcript	ZK896.6	protein_coding
IV	12871218	G	[A]	{G, A}	0.106061	1	TRUE	FALSE	TRUE	0.191071	66	0	7	59	A	missense_variant&splice_region_variant	MODERATE	clec-187	WBGene00014137	transcript	ZK896.6	protein_coding
IV	12871285	T	[C]	{C, T}	0.0909091	1	TRUE	FALSE	TRUE	0.166551	66	0	6	60	C	missense_variant	MODERATE	clec-187	WBGene00014137	transcript	ZK896.6	protein_coding
IV	12872843	C	[T]	{C, T}	0.0909091	1	TRUE	FALSE	TRUE	0.166551	66	0	6	60	T	missense_variant	MODERATE	ZK896.1	WBGene00014132	transcript	ZK896.1	protein_coding
IV	12872852	T	[C]	{C, T}	0.0909091	1	TRUE	FALSE	TRUE	0.166551	66	0	6	60	C	missense_variant	MODERATE	ZK896.1	WBGene00014132	transcript	ZK896.1	protein_coding
IV	12872861	C	[A]	{C, A}	0.0151515	1	TRUE	FALSE	FALSE	0.0300717	66	0	1	65	A	missense_variant	MODERATE	ZK896.1	WBGene00014132	transcript	ZK896.1	protein_coding
IV	12872935	G	[A]	{G, A}	0.0151515	1	TRUE	FALSE	TRUE	0.0300717	66	0	1	65	A	missense_variant	MODERATE	ZK896.1	WBGene00014132	transcript	ZK896.1	protein_coding
IV	12872944	G	[A]	{G, A}	0.0151515	1	TRUE	FALSE	TRUE	0.0300717	66	0	1	65	A	missense_variant	MODERATE	ZK896.1	WBGene00014132	transcript	ZK896.1	protein_coding
IV	12873209	G	[A]	{G, A}	0.0909091	1	TRUE	FALSE	TRUE	0.166551	66	0	6	60	A	missense_variant	MODERATE	ZK896.1	WBGene00014132	transcript	ZK896.1	protein_coding
IV	12873210	C	[A]	{C, A}	0.0909091	1	TRUE	FALSE	FALSE	0.166551	66	0	6	60	A	missense_variant	MODERATE	ZK896.1	WBGene00014132	transcript	ZK896.1	protein_coding
IV	12873212	T	[C]	{C, T}	0.0909091	1	TRUE	FALSE	TRUE	0.166551	66	0	6	60	C	missense_variant	MODERATE	ZK896.1	WBGene00014132	transcript	ZK896.1	protein_coding
IV	12873235	C	[T]	{C, T}	0.0909091	1	TRUE	FALSE	TRUE	0.166551	66	0	6	60	T	missense_variant	MODERATE	ZK896.1	WBGene00014132	transcript	ZK896.1	protein_coding
IV	12873304	A	[G]	{G, A}	0.0909091	1	TRUE	FALSE	TRUE	0.166551	66	0	6	60	G	missense_variant	MODERATE	ZK896.1	WBGene00014132	transcript	ZK896.1	protein_coding
IV	12873311	A	[G]	{G, A}	0.0909091	1	TRUE	FALSE	TRUE	0.166551	66	0	6	60	G	missense_variant	MODERATE	ZK896.1	WBGene00014132	transcript	ZK896.1	protein_coding
IV	12873320	C	[G]	{C, G}	0.0909091	1	TRUE	FALSE	FALSE	0.166551	66	0	6	60	G	missense_variant&splice_region_variant	MODERATE	ZK896.1	WBGene00014132	transcript	ZK896.1	protein_coding
IV	12873372	T	[C]	{C, T}	0.0909091	1	TRUE	FALSE	TRUE	0.166551	66	0	6	60	C	missense_variant&splice_region_variant	MODERATE	ZK896.1	WBGene00014132	transcript	ZK896.1	protein_coding
IV	12873374	T	[G]	{G, T}	0.0909091	1	TRUE	FALSE	FALSE	0.166551	66	0	6	60	G	missense_variant&splice_region_variant	MODERATE	ZK896.1	WBGene00014132	transcript	ZK896.1	protein_coding
IV	12873378	GTGTATA	[G]	{GTGTATA, G}	0.0833333	1	FALSE	TRUE	FALSE	0.153944	66	1	5	60	G	conservative_inframe_deletion	MODERATE	ZK896.1	WBGene00014132	transcript	ZK896.1	protein_coding
IV	12873395	C	[A]	{C, A}	0.0909091	1	TRUE	FALSE	FALSE	0.166551	66	0	6	60	A	missense_variant	MODERATE	ZK896.1	WBGene00014132	transcript	ZK896.1	protein_coding
IV	12873410	C	[T]	{C, T}	0.0909091	1	TRUE	FALSE	TRUE	0.166551	66	0	6	60	T	missense_variant	MODERATE	ZK896.1	WBGene00014132	transcript	ZK896.1	protein_coding
IV	12873434	T	[A]	{A, T}	0.0923077	0.984848	TRUE	FALSE	FALSE	0.168873	65	0	6	59	A	missense_variant	MODERATE	ZK896.1	WBGene00014132	transcript	ZK896.1	protein_coding
IV	12873956	T	[C]	{C, T}	0.0909091	1	TRUE	FALSE	TRUE	0.166551	66	0	6	60	C	missense_variant	MODERATE	ZK896.1	WBGene00014132	transcript	ZK896.1	protein_coding
IV	12873974	G	[A]	{G, A}	0.0909091	1	TRUE	FALSE	TRUE	0.166551	66	0	6	60	A	missense_variant	MODERATE	ZK896.1	WBGene00014132	transcript	ZK896.1	protein_coding
IV	12874028	G	[A]	{G, A}	0.0909091	1	TRUE	FALSE	TRUE	0.166551	66	0	6	60	A	missense_variant	MODERATE	ZK896.1	WBGene00014132	transcript	ZK896.1	protein_coding
IV	12874043	A	[T]	{A, T}	0.0909091	1	TRUE	FALSE	FALSE	0.166551	66	0	6	60	T	missense_variant	MODERATE	ZK896.1	WBGene00014132	transcript	ZK896.1	protein_coding
IV	12874080	A	[T]	{A, T}	0.0909091	1	TRUE	FALSE	FALSE	0.166551	66	0	6	60	T	missense_variant	MODERATE	ZK896.1	WBGene00014132	transcript	ZK896.1	protein_coding
IV	12874094	T	[A]	{A, T}	0.0909091	1	TRUE	FALSE	FALSE	0.166551	66	0	6	60	A	missense_variant	MODERATE	ZK896.1	WBGene00014132	transcript	ZK896.1	protein_coding
IV	12874095	T	[C]	{C, T}	0.0909091	1	TRUE	FALSE	TRUE	0.166551	66	0	6	60	C	missense_variant	MODERATE	ZK896.1	WBGene00014132	transcript	ZK896.1	protein_coding
IV	12874098	G	[C]	{C, G}	0.0909091	1	TRUE	FALSE	FALSE	0.166551	66	0	6	60	C	missense_variant	MODERATE	ZK896.1	WBGene00014132	transcript	ZK896.1	protein_coding
IV	12874192	C	[T]	{C, T}	0.0151515	1	TRUE	FALSE	TRUE	0.0300717	66	0	1	65	T	missense_variant	MODERATE	ZK896.1	WBGene00014132	transcript	ZK896.1	protein_coding
IV	12874211	T	[G]	{G, T}	0.0909091	1	TRUE	FALSE	FALSE	0.166551	66	0	6	60	G	missense_variant	MODERATE	ZK896.1	WBGene00014132	transcript	ZK896.1	protein_coding
IV	12874218	G	[T]	{G, T}	0.0909091	1	TRUE	FALSE	FALSE	0.166551	66	0	6	60	T	missense_variant	MODERATE	ZK896.1	WBGene00014132	transcript	ZK896.1	protein_coding
IV	12874221	T	[A]	{A, T}	0.0909091	1	TRUE	FALSE	FALSE	0.166551	66	0	6	60	A	missense_variant	MODERATE	ZK896.1	WBGene00014132	transcript	ZK896.1	protein_coding
IV	12874224	T	[G]	{G, T}	0.0909091	1	TRUE	FALSE	FALSE	0.166551	66	0	6	60	G	missense_variant	MODERATE	ZK896.1	WBGene00014132	transcript	ZK896.1	protein_coding
IV	12874230	G	[C]	{C, G}	0.0909091	1	TRUE	FALSE	FALSE	0.166551	66	0	6	60	C	missense_variant	MODERATE	ZK896.1	WBGene00014132	transcript	ZK896.1	protein_coding
IV	12874231	A	[G]	{G, A}	0.0909091	1	TRUE	FALSE	TRUE	0.166551	66	0	6	60	G	missense_variant	MODERATE	ZK896.1	WBGene00014132	transcript	ZK896.1	protein_coding
IV	12874432	T	[C]	{C, T}	0.0909091	1	TRUE	FALSE	TRUE	0.166551	66	0	6	60	C	missense_variant	MODERATE	ZK896.1	WBGene00014132	transcript	ZK896.1	protein_coding
IV	12874438	G	[A]	{G, A}	0.0909091	1	TRUE	FALSE	TRUE	0.166551	66	0	6	60	A	missense_variant	MODERATE	ZK896.1	WBGene00014132	transcript	ZK896.1	protein_coding
IV	12874486	T	[C]	{C, T}	0.0909091	1	TRUE	FALSE	TRUE	0.166551	66	0	6	60	C	missense_variant	MODERATE	ZK896.1	WBGene00014132	transcript	ZK896.1	protein_coding
IV	12874488	G	[A]	{G, A}	0.0909091	1	TRUE	FALSE	TRUE	0.166551	66	0	6	60	A	missense_variant	MODERATE	ZK896.1	WBGene00014132	transcript	ZK896.1	protein_coding
IV	12874489	T	[A]	{A, T}	0.0909091	1	TRUE	FALSE	FALSE	0.166551	66	0	6	60	A	missense_variant	MODERATE	ZK896.1	WBGene00014132	transcript	ZK896.1	protein_coding
IV	12874509	G	[A]	{G, A}	0.0909091	1	TRUE	FALSE	TRUE	0.166551	66	0	6	60	A	missense_variant	MODERATE	ZK896.1	WBGene00014132	transcript	ZK896.1	protein_coding
IV	12874660	G	[T]	{G, T}	0.0909091	1	TRUE	FALSE	FALSE	0.166551	66	0	6	60	T	missense_variant&splice_region_variant	MODERATE	ZK896.1	WBGene00014132	transcript	ZK896.1	protein_coding
IV	12874754	T	[C]	{C, T}	0.0909091	1	TRUE	FALSE	TRUE	0.166551	66	0	6	60	C	missense_variant	MODERATE	ZK896.1	WBGene00014132	transcript	ZK896.1	protein_coding
IV	12874870	G	[A]	{G, A}	0.0909091	1	TRUE	FALSE	TRUE	0.166551	66	0	6	60	A	missense_variant	MODERATE	ZK896.1	WBGene00014132	transcript	ZK896.1	protein_coding
IV	12874882	G	[A]	{G, A}	0.0151515	1	TRUE	FALSE	TRUE	0.0300717	66	0	1	65	A	missense_variant	MODERATE	ZK896.1	WBGene00014132	transcript	ZK896.1	protein_coding
IV	12874925	T	[C]	{C, T}	0.0909091	1	TRUE	FALSE	TRUE	0.166551	66	0	6	60	C	missense_variant	MODERATE	ZK896.1	WBGene00014132	transcript	ZK896.1	protein_coding
IV	12874926	G	[T]	{G, T}	0.0909091	1	TRUE	FALSE	FALSE	0.166551	66	0	6	60	T	missense_variant	MODERATE	ZK896.1	WBGene00014132	transcript	ZK896.1	protein_coding
IV	12874936	A	[C]	{C, A}	0.0909091	1	TRUE	FALSE	FALSE	0.166551	66	0	6	60	C	missense_variant	MODERATE	ZK896.1	WBGene00014132	transcript	ZK896.1	protein_coding
IV	12875042	T	[A]	{A, T}	0.0909091	1	TRUE	FALSE	FALSE	0.166551	66	0	6	60	A	missense_variant&splice_region_variant	MODERATE	ZK896.1	WBGene00014132	transcript	ZK896.1	protein_coding
IV	12875085	G	[T]	{G, T}	0.0153846	0.984848	TRUE	FALSE	FALSE	0.0305307	65	0	1	64	T	missense_variant	MODERATE	ZK896.1	WBGene00014132	transcript	ZK896.1	protein_coding
IV	12875099	T	[G]	{G, T}	0.0909091	1	TRUE	FALSE	FALSE	0.166551	66	0	6	60	G	missense_variant	MODERATE	ZK896.1	WBGene00014132	transcript	ZK896.1	protein_coding
IV	12875118	A	[C]	{C, A}	0.0909091	1	TRUE	FALSE	FALSE	0.166551	66	0	6	60	C	missense_variant	MODERATE	ZK896.1	WBGene00014132	transcript	ZK896.1	protein_coding
IV	12875133	C	[G]	{C, G}	0.0909091	1	TRUE	FALSE	FALSE	0.166551	66	0	6	60	G	missense_variant	MODERATE	ZK896.1	WBGene00014132	transcript	ZK896.1	protein_coding
IV	12875153	A	[T]	{A, T}	0.0909091	1	TRUE	FALSE	FALSE	0.166551	66	0	6	60	T	missense_variant	MODERATE	ZK896.1	WBGene00014132	transcript	ZK896.1	protein_coding
IV	12875282	T	[C]	{C, T}	0.0909091	1	TRUE	FALSE	TRUE	0.166551	66	0	6	60	C	missense_variant	MODERATE	ZK896.1	WBGene00014132	transcript	ZK896.1	protein_coding
IV	12875284	C	[G]	{C, G}	0.0909091	1	TRUE	FALSE	FALSE	0.166551	66	0	6	60	G	missense_variant	MODERATE	ZK896.1	WBGene00014132	transcript	ZK896.1	protein_coding
IV	12875285	C	[T]	{C, T}	0.0909091	1	TRUE	FALSE	TRUE	0.166551	66	0	6	60	T	missense_variant	MODERATE	ZK896.1	WBGene00014132	transcript	ZK896.1	protein_coding
IV	12875286	C	[A]	{C, A}	0.0909091	1	TRUE	FALSE	FALSE	0.166551	66	0	6	60	A	missense_variant	MODERATE	ZK896.1	WBGene00014132	transcript	ZK896.1	protein_coding
IV	12875320	A	[T]	{A, T}	0.0909091	1	TRUE	FALSE	FALSE	0.166551	66	0	6	60	T	missense_variant	MODERATE	ZK896.1	WBGene00014132	transcript	ZK896.1	protein_coding
IV	12877220	C	[A]	{C, A}	0.0757576	1	TRUE	FALSE	FALSE	0.141106	66	0	5	61	A	missense_variant	MODERATE	ZK896.5	WBGene00014136	transcript	ZK896.5.1	protein_coding
IV	12877321	G	[A]	{G, A}	0.121212	1	TRUE	FALSE	TRUE	0.214666	66	4	6	56	A	missense_variant	MODERATE	ZK896.5	WBGene00014136	transcript	ZK896.5.1	protein_coding
IV	12877322	T	[A]	{A, T}	0.0909091	1	TRUE	FALSE	FALSE	0.166551	66	0	6	60	A	missense_variant	MODERATE	ZK896.5	WBGene00014136	transcript	ZK896.5.1	protein_coding
IV	12877348	C	[T]	{C, T}	0.0833333	1	TRUE	FALSE	TRUE	0.153944	66	1	5	60	T	missense_variant	MODERATE	ZK896.5	WBGene00014136	transcript	ZK896.5.1	protein_coding
IV	12877355	G	[C]	{C, G}	0.0833333	1	TRUE	FALSE	FALSE	0.153944	66	1	5	60	C	missense_variant	MODERATE	ZK896.5	WBGene00014136	transcript	ZK896.5.1	protein_coding
IV	12877363	C	[T]	{C, T}	0.0833333	1	TRUE	FALSE	TRUE	0.153944	66	1	5	60	T	missense_variant	MODERATE	ZK896.5	WBGene00014136	transcript	ZK896.5.1	protein_coding
IV	12877406	C	[T]	{C, T}	0.0909091	1	TRUE	FALSE	TRUE	0.166551	66	0	6	60	T	missense_variant	MODERATE	ZK896.5	WBGene00014136	transcript	ZK896.5.1	protein_coding
IV	12877434	T	[C]	{C, T}	0.121212	1	TRUE	FALSE	TRUE	0.214666	66	4	6	56	C	missense_variant	MODERATE	ZK896.5	WBGene00014136	transcript	ZK896.5.1	protein_coding
IV	12877436	T	[G]	{G, T}	0.0909091	1	TRUE	FALSE	FALSE	0.166551	66	0	6	60	G	missense_variant	MODERATE	ZK896.5	WBGene00014136	transcript	ZK896.5.1	protein_coding
IV	12877642	T	[C]	{C, T}	0.0909091	1	TRUE	FALSE	TRUE	0.166551	66	0	6	60	C	missense_variant	MODERATE	ZK896.5	WBGene00014136	transcript	ZK896.5.1	protein_coding
IV	12877919	A	[T]	{A, T}	0.0909091	1	TRUE	FALSE	FALSE	0.166551	66	0	6	60	T	missense_variant	MODERATE	ZK896.5	WBGene00014136	transcript	ZK896.5.1	protein_coding
IV	12877924	C	[T]	{C, T}	0.0909091	1	TRUE	FALSE	TRUE	0.166551	66	0	6	60	T	missense_variant	MODERATE	ZK896.5	WBGene00014136	transcript	ZK896.5.1	protein_coding
IV	12877927	G	[T]	{G, T}	0.0909091	1	TRUE	FALSE	FALSE	0.166551	66	0	6	60	T	missense_variant	MODERATE	ZK896.5	WBGene00014136	transcript	ZK896.5.1	protein_coding
IV	12877935	G	[T]	{G, T}	0.0909091	1	TRUE	FALSE	FALSE	0.166551	66	0	6	60	T	missense_variant	MODERATE	ZK896.5	WBGene00014136	transcript	ZK896.5.1	protein_coding
IV	12877938	T	[A]	{A, T}	0.0909091	1	TRUE	FALSE	FALSE	0.166551	66	0	6	60	A	missense_variant	MODERATE	ZK896.5	WBGene00014136	transcript	ZK896.5.1	protein_coding
IV	12878197	C	[T]	{C, T}	0.106061	1	TRUE	FALSE	TRUE	0.191071	66	0	7	59	T	missense_variant	MODERATE	ZK896.5	WBGene00014136	transcript	ZK896.5.1	protein_coding
IV	12878200	T	[C]	{C, T}	0.0909091	1	TRUE	FALSE	TRUE	0.166551	66	0	6	60	C	missense_variant	MODERATE	ZK896.5	WBGene00014136	transcript	ZK896.5.1	protein_coding
IV	12878349	T	[A]	{A, T}	0.356061	1	TRUE	FALSE	FALSE	0.462063	66	1	23	42	A	missense_variant	MODERATE	ZK896.5	WBGene00014136	transcript	ZK896.5.1	protein_coding
IV	12878513	C	[G]	{C, G}	0.0909091	1	TRUE	FALSE	FALSE	0.166551	66	0	6	60	G	missense_variant	MODERATE	ZK896.5	WBGene00014136	transcript	ZK896.5.1	protein_coding
IV	12878517	C	[T]	{C, T}	0.0909091	1	TRUE	FALSE	TRUE	0.166551	66	0	6	60	T	missense_variant	MODERATE	ZK896.5	WBGene00014136	transcript	ZK896.5.1	protein_coding
IV	12878519	G	[T]	{G, T}	0.0909091	1	TRUE	FALSE	FALSE	0.166551	66	0	6	60	T	missense_variant	MODERATE	ZK896.5	WBGene00014136	transcript	ZK896.5.1	protein_coding
IV	12878520	A	[T]	{A, T}	0.212121	1	TRUE	FALSE	FALSE	0.336803	66	0	14	52	T	missense_variant	MODERATE	ZK896.5	WBGene00014136	transcript	ZK896.5.1	protein_coding
IV	12878682	C	[A]	{C, A}	0.0151515	1	TRUE	FALSE	FALSE	0.0300717	66	0	1	65	A	missense_variant&splice_region_variant	MODERATE	ZK896.5	WBGene00014136	transcript	ZK896.5.1	protein_coding
IV	12878718	T	[C]	{C, T}	0.121212	1	TRUE	FALSE	TRUE	0.214666	66	0	8	58	C	missense_variant	MODERATE	ZK896.5	WBGene00014136	transcript	ZK896.5.1	protein_coding
IV	12878724	C	[T]	{C, T}	0.121212	1	TRUE	FALSE	TRUE	0.214666	66	0	8	58	T	missense_variant	MODERATE	ZK896.5	WBGene00014136	transcript	ZK896.5.1	protein_coding
IV	12878784	C	[T]	{C, T}	0.121212	1	TRUE	FALSE	TRUE	0.214666	66	0	8	58	T	missense_variant	MODERATE	ZK896.5	WBGene00014136	transcript	ZK896.5.1	protein_coding
IV	12878843	G	[C]	{C, G}	0.0151515	1	TRUE	FALSE	FALSE	0.0300717	66	0	1	65	C	missense_variant	MODERATE	ZK896.5	WBGene00014136	transcript	ZK896.5.1	protein_coding
IV	12878883	T	[A]	{A, T}	0.121212	1	TRUE	FALSE	FALSE	0.214666	66	0	8	58	A	missense_variant	MODERATE	ZK896.5	WBGene00014136	transcript	ZK896.5.1	protein_coding
IV	12878886	T	[A]	{A, T}	0.106061	1	TRUE	FALSE	FALSE	0.191071	66	0	7	59	A	missense_variant	MODERATE	ZK896.5	WBGene00014136	transcript	ZK896.5.1	protein_coding
IV	12878901	C	[T]	{C, T}	0.0151515	1	TRUE	FALSE	TRUE	0.0300717	66	0	1	65	T	missense_variant	MODERATE	ZK896.5	WBGene00014136	transcript	ZK896.5.1	protein_coding
IV	12879189	T	[C]	{C, T}	0.0606061	1	TRUE	FALSE	TRUE	0.114735	66	0	4	62	C	missense_variant	MODERATE	ZK896.5	WBGene00014136	transcript	ZK896.5.1	protein_coding
IV	12879191	A	[G]	{G, A}	0.0606061	1	TRUE	FALSE	TRUE	0.114735	66	0	4	62	G	missense_variant	MODERATE	ZK896.5	WBGene00014136	transcript	ZK896.5.1	protein_coding
IV	12879198	G	[C]	{C, G}	0.0151515	1	TRUE	FALSE	FALSE	0.0300717	66	0	1	65	C	missense_variant	MODERATE	ZK896.5	WBGene00014136	transcript	ZK896.5.1	protein_coding
IV	12879598	C	[A]	{C, A}	0.0606061	1	TRUE	FALSE	FALSE	0.114735	66	0	4	62	A	missense_variant	MODERATE	ZK896.5	WBGene00014136	transcript	ZK896.5.1	protein_coding
IV	12879622	A	[C]	{C, A}	0.0606061	1	TRUE	FALSE	FALSE	0.114735	66	0	4	62	C	missense_variant	MODERATE	ZK896.5	WBGene00014136	transcript	ZK896.5.1	protein_coding
IV	12880702	C	[T]	{C, T}	0.0606061	1	TRUE	FALSE	TRUE	0.114735	66	0	4	62	T	missense_variant	MODERATE	ZK896.4	WBGene00014135	transcript	ZK896.4	protein_coding
IV	12880819	T	[C]	{C, T}	0.0606061	1	TRUE	FALSE	TRUE	0.114735	66	0	4	62	C	missense_variant	MODERATE	ZK896.4	WBGene00014135	transcript	ZK896.4	protein_coding
IV	12880878	C	[T]	{C, T}	0.0151515	1	TRUE	FALSE	TRUE	0.0300717	66	0	1	65	T	missense_variant	MODERATE	ZK896.4	WBGene00014135	transcript	ZK896.4	protein_coding
IV	12880959	T	[G]	{G, T}	0.030303	1	TRUE	FALSE	FALSE	0.0592181	66	0	2	64	G	missense_variant	MODERATE	ZK896.4	WBGene00014135	transcript	ZK896.4	protein_coding
IV	12880964	T	[C]	{C, T}	0.0606061	1	TRUE	FALSE	TRUE	0.114735	66	0	4	62	C	missense_variant	MODERATE	ZK896.4	WBGene00014135	transcript	ZK896.4	protein_coding
IV	12880966	T	[A]	{A, T}	0.0757576	1	TRUE	FALSE	FALSE	0.141106	66	0	5	61	A	missense_variant	MODERATE	ZK896.4	WBGene00014135	transcript	ZK896.4	protein_coding
IV	12881062	T	[A]	{A, T}	0.0606061	1	TRUE	FALSE	FALSE	0.114735	66	0	4	62	A	missense_variant	MODERATE	ZK896.4	WBGene00014135	transcript	ZK896.4	protein_coding
IV	12881122	C	[T]	{C, T}	0.0606061	1	TRUE	FALSE	TRUE	0.114735	66	0	4	62	T	missense_variant	MODERATE	ZK896.4	WBGene00014135	transcript	ZK896.4	protein_coding
IV	12881143	G	[C]	{C, G}	0.0606061	1	TRUE	FALSE	FALSE	0.114735	66	0	4	62	C	missense_variant	MODERATE	ZK896.4	WBGene00014135	transcript	ZK896.4	protein_coding
IV	12881426	T	[G]	{G, T}	0.0606061	1	TRUE	FALSE	FALSE	0.114735	66	0	4	62	G	missense_variant	MODERATE	ZK896.4	WBGene00014135	transcript	ZK896.4	protein_coding
IV	12881571	T	[C]	{C, T}	0.0606061	1	TRUE	FALSE	TRUE	0.114735	66	0	4	62	C	missense_variant	MODERATE	ZK896.4	WBGene00014135	transcript	ZK896.4	protein_coding
IV	12881592	G	[C]	{C, G}	0.136364	1	TRUE	FALSE	FALSE	0.237335	66	0	9	57	C	missense_variant	MODERATE	ZK896.4	WBGene00014135	transcript	ZK896.4	protein_coding
IV	12881604	T	[C]	{C, T}	0.0606061	1	TRUE	FALSE	TRUE	0.114735	66	0	4	62	C	missense_variant	MODERATE	ZK896.4	WBGene00014135	transcript	ZK896.4	protein_coding
IV	12881667	G	[T]	{G, T}	0.0606061	1	TRUE	FALSE	FALSE	0.114735	66	0	4	62	T	missense_variant	MODERATE	ZK896.4	WBGene00014135	transcript	ZK896.4	protein_coding
IV	12881864	C	[T]	{C, T}	0.0606061	1	TRUE	FALSE	TRUE	0.114735	66	0	4	62	T	missense_variant	MODERATE	ZK896.4	WBGene00014135	transcript	ZK896.4	protein_coding
IV	12882147	A	[T]	{A, T}	0.0606061	1	TRUE	FALSE	FALSE	0.114735	66	0	4	62	T	missense_variant	MODERATE	ZK896.4	WBGene00014135	transcript	ZK896.4	protein_coding
IV	12882456	G	[T]	{G, T}	0.0606061	1	TRUE	FALSE	FALSE	0.114735	66	0	4	62	T	missense_variant	MODERATE	ZK896.4	WBGene00014135	transcript	ZK896.4	protein_coding
IV	12882469	C	[T]	{C, T}	0.0606061	1	TRUE	FALSE	TRUE	0.114735	66	0	4	62	T	missense_variant	MODERATE	ZK896.4	WBGene00014135	transcript	ZK896.4	protein_coding
IV	12882475	A	[T]	{A, T}	0.0606061	1	TRUE	FALSE	FALSE	0.114735	66	0	4	62	T	missense_variant	MODERATE	ZK896.4	WBGene00014135	transcript	ZK896.4	protein_coding
IV	12882502	T	[G]	{G, T}	0.0606061	1	TRUE	FALSE	FALSE	0.114735	66	0	4	62	G	missense_variant	MODERATE	ZK896.4	WBGene00014135	transcript	ZK896.4	protein_coding
IV	12882626	G	[A]	{G, A}	0.0151515	1	TRUE	FALSE	TRUE	0.0300717	66	0	1	65	A	missense_variant	MODERATE	ZK896.4	WBGene00014135	transcript	ZK896.4	protein_coding
IV	12882789	C	[T]	{C, T}	0.0151515	1	TRUE	FALSE	TRUE	0.0300717	66	0	1	65	T	missense_variant	MODERATE	ZK896.4	WBGene00014135	transcript	ZK896.4	protein_coding
IV	12883113	C	[A]	{C, A}	0.0606061	1	TRUE	FALSE	FALSE	0.114735	66	0	4	62	A	missense_variant	MODERATE	ZK896.4	WBGene00014135	transcript	ZK896.4	protein_coding
IV	12887394	C	[T]	{C, T}	0.0151515	1	TRUE	FALSE	TRUE	0.0300717	66	0	1	65	T	missense_variant	MODERATE	K08D8.6	WBGene00010660	transcript	K08D8.6a	protein_coding
IV	12887505	C	[T]	{C, T}	0.0151515	1	TRUE	FALSE	TRUE	0.0300717	66	0	1	65	T	missense_variant	MODERATE	K08D8.6	WBGene00010660	transcript	K08D8.6a	protein_coding
IV	12887903	G	[T]	{G, T}	0.0151515	1	TRUE	FALSE	FALSE	0.0300717	66	0	1	65	T	missense_variant	MODERATE	K08D8.6	WBGene00010660	transcript	K08D8.6a	protein_coding
IV	12887945	G	[T]	{G, T}	0.0454545	1	TRUE	FALSE	FALSE	0.0874393	66	0	3	63	T	missense_variant	MODERATE	K08D8.6	WBGene00010660	transcript	K08D8.6a	protein_coding
IV	12888036	G	[T]	{G, T}	0.0151515	1	TRUE	FALSE	FALSE	0.0300717	66	0	1	65	T	missense_variant&splice_region_variant	MODERATE	K08D8.6	WBGene00010660	transcript	K08D8.6a	protein_coding
IV	12888055	T	[A]	{A, T}	0.0151515	1	TRUE	FALSE	FALSE	0.0300717	66	0	1	65	A	missense_variant	MODERATE	K08D8.6	WBGene00010660	transcript	K08D8.6a	protein_coding
IV	12888309	A	[T]	{A, T}	0.0151515	1	TRUE	FALSE	FALSE	0.0300717	66	0	1	65	T	missense_variant	MODERATE	K08D8.6	WBGene00010660	transcript	K08D8.6a	protein_coding
IV	12888311	C	[T]	{C, T}	0.0151515	1	TRUE	FALSE	TRUE	0.0300717	66	0	1	65	T	missense_variant	MODERATE	K08D8.6	WBGene00010660	transcript	K08D8.6a	protein_coding
IV	12888349	G	[A]	{G, A}	0.0151515	1	TRUE	FALSE	TRUE	0.0300717	66	0	1	65	A	missense_variant	MODERATE	K08D8.6	WBGene00010660	transcript	K08D8.6a	protein_coding
IV	12888350	T	[G]	{G, T}	0.0151515	1	TRUE	FALSE	FALSE	0.0300717	66	0	1	65	G	missense_variant	MODERATE	K08D8.6	WBGene00010660	transcript	K08D8.6a	protein_coding
IV	12888368	G	[T]	{G, T}	0.0151515	1	TRUE	FALSE	FALSE	0.0300717	66	0	1	65	T	missense_variant	MODERATE	K08D8.6	WBGene00010660	transcript	K08D8.6a	protein_coding
IV	12888397	A	[T]	{A, T}	0.0151515	1	TRUE	FALSE	FALSE	0.0300717	66	0	1	65	T	missense_variant	MODERATE	K08D8.6	WBGene00010660	transcript	K08D8.6a	protein_coding
IV	12888513	C	[T]	{C, T}	0.0151515	1	TRUE	FALSE	TRUE	0.0300717	66	0	1	65	T	missense_variant	MODERATE	K08D8.6	WBGene00010660	transcript	K08D8.6a	protein_coding
IV	12888521	A	[C]	{C, A}	0.19697	1	TRUE	FALSE	FALSE	0.31876	66	0	13	53	C	missense_variant	MODERATE	K08D8.6	WBGene00010660	transcript	K08D8.6a	protein_coding
IV	12888522	T	[G]	{G, T}	0.0151515	1	TRUE	FALSE	FALSE	0.0300717	66	0	1	65	G	missense_variant	MODERATE	K08D8.6	WBGene00010660	transcript	K08D8.6a	protein_coding
IV	12888524	T	[C]	{C, T}	0.0454545	1	TRUE	FALSE	TRUE	0.0874393	66	0	3	63	C	missense_variant	MODERATE	K08D8.6	WBGene00010660	transcript	K08D8.6a	protein_coding
IV	12888539	T	[C]	{C, T}	0.0151515	1	TRUE	FALSE	TRUE	0.0300717	66	0	1	65	C	missense_variant	MODERATE	K08D8.6	WBGene00010660	transcript	K08D8.6a	protein_coding
IV	12888683	G	[T]	{G, T}	0.0151515	1	TRUE	FALSE	FALSE	0.0300717	66	0	1	65	T	missense_variant	MODERATE	K08D8.6	WBGene00010660	transcript	K08D8.6a	protein_coding
IV	12888731	G	[T]	{G, T}	0.0151515	1	TRUE	FALSE	FALSE	0.0300717	66	0	1	65	T	missense_variant	MODERATE	K08D8.6	WBGene00010660	transcript	K08D8.6a	protein_coding
IV	12888732	C	[T]	{C, T}	0.212121	1	TRUE	FALSE	TRUE	0.336803	66	0	14	52	T	missense_variant	MODERATE	K08D8.6	WBGene00010660	transcript	K08D8.6a	protein_coding
IV	12888755	G	[A]	{G, A}	0.0151515	1	TRUE	FALSE	TRUE	0.0300717	66	0	1	65	A	missense_variant	MODERATE	K08D8.6	WBGene00010660	transcript	K08D8.6a	protein_coding
IV	12888758	A	[G]	{G, A}	0.212121	1	TRUE	FALSE	TRUE	0.336803	66	0	14	52	G	missense_variant	MODERATE	K08D8.6	WBGene00010660	transcript	K08D8.6a	protein_coding
IV	12888814	G	[T]	{G, T}	0.0151515	1	TRUE	FALSE	FALSE	0.0300717	66	0	1	65	T	missense_variant	MODERATE	K08D8.6	WBGene00010660	transcript	K08D8.6a	protein_coding
IV	12888882	A	[G]	{G, A}	0.0151515	1	TRUE	FALSE	TRUE	0.0300717	66	0	1	65	G	missense_variant	MODERATE	K08D8.6	WBGene00010660	transcript	K08D8.6a	protein_coding
IV	12889510	T	[A]	{A, T}	0.0151515	1	TRUE	FALSE	FALSE	0.0300717	66	0	1	65	A	missense_variant&splice_region_variant	MODERATE	K08D8.6	WBGene00010660	transcript	K08D8.6a	protein_coding
IV	12889516	T	[A]	{A, T}	0.0151515	1	TRUE	FALSE	FALSE	0.0300717	66	0	1	65	A	missense_variant	MODERATE	K08D8.6	WBGene00010660	transcript	K08D8.6a	protein_coding
IV	12889521	C	[A]	{C, A}	0.0151515	1	TRUE	FALSE	FALSE	0.0300717	66	0	1	65	A	missense_variant	MODERATE	K08D8.6	WBGene00010660	transcript	K08D8.6a	protein_coding
IV	12889549	T	[C]	{C, T}	0.0153846	0.984848	TRUE	FALSE	TRUE	0.0305307	65	0	1	64	C	missense_variant	MODERATE	K08D8.6	WBGene00010660	transcript	K08D8.6a	protein_coding
IV	12889550	A	[T]	{A, T}	0.0153846	0.984848	TRUE	FALSE	FALSE	0.0305307	65	0	1	64	T	missense_variant	MODERATE	K08D8.6	WBGene00010660	transcript	K08D8.6a	protein_coding
IV	12889605	T	[C]	{C, T}	0.0153846	0.984848	TRUE	FALSE	TRUE	0.0305307	65	0	1	64	C	missense_variant	MODERATE	K08D8.6	WBGene00010660	transcript	K08D8.6a	protein_coding
IV	12889717	G	[A]	{G, A}	0.030303	1	TRUE	FALSE	TRUE	0.0592181	66	0	2	64	A	missense_variant	MODERATE	K08D8.6	WBGene00010660	transcript	K08D8.6a	protein_coding
IV	12889734	A	[G]	{G, A}	0.0151515	1	TRUE	FALSE	TRUE	0.0300717	66	0	1	65	G	missense_variant	MODERATE	K08D8.6	WBGene00010660	transcript	K08D8.6a	protein_coding
IV	12889740	T	[G]	{G, T}	0.0151515	1	TRUE	FALSE	FALSE	0.0300717	66	0	1	65	G	missense_variant	MODERATE	K08D8.6	WBGene00010660	transcript	K08D8.6a	protein_coding
IV	12889741	G	[C]	{C, G}	0.0151515	1	TRUE	FALSE	FALSE	0.0300717	66	0	1	65	C	missense_variant	MODERATE	K08D8.6	WBGene00010660	transcript	K08D8.6a	protein_coding
IV	12889865	T	[A]	{A, T}	0.136364	1	TRUE	FALSE	FALSE	0.237335	66	0	9	57	A	missense_variant	MODERATE	K08D8.6	WBGene00010660	transcript	K08D8.6a	protein_coding
IV	12889869	T	[A]	{A, T}	0.0151515	1	TRUE	FALSE	FALSE	0.0300717	66	0	1	65	A	missense_variant	MODERATE	K08D8.6	WBGene00010660	transcript	K08D8.6a	protein_coding
IV	12889930	A	[G]	{G, A}	0.0151515	1	TRUE	FALSE	TRUE	0.0300717	66	0	1	65	G	missense_variant	MODERATE	K08D8.6	WBGene00010660	transcript	K08D8.6a	protein_coding
IV	12889936	G	[A]	{G, A}	0.0151515	1	TRUE	FALSE	TRUE	0.0300717	66	0	1	65	A	missense_variant	MODERATE	K08D8.6	WBGene00010660	transcript	K08D8.6a	protein_coding
IV	12890445	C	[T]	{C, T}	0.0151515	1	TRUE	FALSE	TRUE	0.0300717	66	0	1	65	T	missense_variant	MODERATE	K08D8.6	WBGene00010660	transcript	K08D8.6a	protein_coding
IV	12890467	T	[C]	{C, T}	0.0151515	1	TRUE	FALSE	TRUE	0.0300717	66	0	1	65	C	missense_variant	MODERATE	K08D8.6	WBGene00010660	transcript	K08D8.6a	protein_coding
IV	12890468	T	[A]	{A, T}	0.0454545	1	TRUE	FALSE	FALSE	0.0874393	66	0	3	63	A	missense_variant	MODERATE	K08D8.6	WBGene00010660	transcript	K08D8.6a	protein_coding
IV	12892538	A	[G]	{G, A}	0.0153846	0.984848	TRUE	FALSE	TRUE	0.0305307	65	0	1	64	G	missense_variant	MODERATE	K08D8.1	WBGene00010655	transcript	K08D8.1	protein_coding
IV	12892573	C	[T]	{C, T}	0.0461538	0.984848	TRUE	FALSE	TRUE	0.0887299	65	0	3	62	T	missense_variant	MODERATE	K08D8.1	WBGene00010655	transcript	K08D8.1	protein_coding
IV	12892574	C	[T]	{C, T}	0.0153846	0.984848	TRUE	FALSE	TRUE	0.0305307	65	0	1	64	T	missense_variant	MODERATE	K08D8.1	WBGene00010655	transcript	K08D8.1	protein_coding
IV	12892655	A	[G]	{G, A}	0.0307692	0.984848	TRUE	FALSE	TRUE	0.0601073	65	0	2	63	G	missense_variant	MODERATE	K08D8.1	WBGene00010655	transcript	K08D8.1	protein_coding
IV	12893189	G	[A]	{G, A}	0.0153846	0.984848	TRUE	FALSE	TRUE	0.0305307	65	0	1	64	A	missense_variant&splice_region_variant	MODERATE	K08D8.1	WBGene00010655	transcript	K08D8.1	protein_coding
IV	12893236	C	[T]	{C, T}	0.424242	1	TRUE	FALSE	TRUE	0.492251	66	0	28	38	T	missense_variant	MODERATE	K08D8.1	WBGene00010655	transcript	K08D8.1	protein_coding
IV	12893851	A	[T]	{A, T}	0.0151515	1	TRUE	FALSE	FALSE	0.0300717	66	0	1	65	T	missense_variant	MODERATE	K08D8.12	WBGene00194926	transcript	K08D8.12a	protein_coding
IV	12893909	T	[G]	{G, T}	0.0151515	1	TRUE	FALSE	FALSE	0.0300717	66	0	1	65	G	missense_variant	MODERATE	K08D8.12	WBGene00194926	transcript	K08D8.12a	protein_coding
IV	12894323	C	[T]	{C, T}	0.0151515	1	TRUE	FALSE	TRUE	0.0300717	66	0	1	65	T	missense_variant	MODERATE	K08D8.12	WBGene00194926	transcript	K08D8.12a	protein_coding
IV	12894633	A	[C]	{C, A}	0.0151515	1	TRUE	FALSE	FALSE	0.0300717	66	0	1	65	C	missense_variant	MODERATE	K08D8.12	WBGene00194926	transcript	K08D8.12b	protein_coding
IV	12894703	G	[T]	{G, T}	0.0454545	1	TRUE	FALSE	FALSE	0.0874393	66	0	3	63	T	missense_variant	MODERATE	K08D8.12	WBGene00194926	transcript	K08D8.12b	protein_coding
IV	12897799	C	[T]	{C, T}	0.0909091	1	TRUE	FALSE	TRUE	0.166551	66	0	6	60	T	missense_variant	MODERATE	K08D8.7	WBGene00185092	transcript	K08D8.7a	protein_coding
IV	12897847	CGATGCATCCCGT	[C]	{C, CGATGCATCCCGT}	0.0151515	1	FALSE	TRUE	FALSE	0.0300717	66	0	1	65	C	conservative_inframe_deletion	MODERATE	K08D8.7	WBGene00185092	transcript	K08D8.7a	protein_coding
IV	12898297	A	[C]	{C, A}	0.280303	1	TRUE	FALSE	FALSE	0.406546	66	5	16	45	C	missense_variant	MODERATE	K08D8.7	WBGene00185092	transcript	K08D8.7a	protein_coding
IV	12898298	T	[A]	{A, T}	0.280303	1	TRUE	FALSE	FALSE	0.406546	66	5	16	45	A	missense_variant	MODERATE	K08D8.7	WBGene00185092	transcript	K08D8.7a	protein_coding
IV	12898302	G	[T]	{G, T}	0.287879	1	TRUE	FALSE	FALSE	0.413139	66	6	16	44	T	missense_variant	MODERATE	K08D8.7	WBGene00185092	transcript	K08D8.7a	protein_coding
IV	12898304	T	[C]	{C, T}	0.287879	1	TRUE	FALSE	TRUE	0.413139	66	6	16	44	C	missense_variant	MODERATE	K08D8.7	WBGene00185092	transcript	K08D8.7a	protein_coding
IV	12898317	T	[G]	{G, T}	0.280303	1	TRUE	FALSE	FALSE	0.406546	66	7	15	44	G	missense_variant	MODERATE	K08D8.7	WBGene00185092	transcript	K08D8.7a	protein_coding
IV	12899717	T	[C]	{C, T}	0.0151515	1	TRUE	FALSE	TRUE	0.0300717	66	0	1	65	C	missense_variant	MODERATE	K08D8.9	WBGene00194918	transcript	K08D8.9	protein_coding
IV	12899725	A	[T]	{A, T}	0.0151515	1	TRUE	FALSE	FALSE	0.0300717	66	0	1	65	T	missense_variant	MODERATE	K08D8.9	WBGene00194918	transcript	K08D8.9	protein_coding
IV	12899742	T	[C]	{C, T}	0.212121	1	TRUE	FALSE	TRUE	0.336803	66	0	14	52	C	missense_variant	MODERATE	K08D8.9	WBGene00194918	transcript	K08D8.9	protein_coding
IV	12899765	A	[G]	{G, A}	0.181818	1	TRUE	FALSE	TRUE	0.299792	66	0	12	54	G	missense_variant	MODERATE	K08D8.9	WBGene00194918	transcript	K08D8.9	protein_coding
IV	12899800	G	[T]	{G, T}	0.0151515	1	TRUE	FALSE	FALSE	0.0300717	66	0	1	65	T	missense_variant	MODERATE	K08D8.9	WBGene00194918	transcript	K08D8.9	protein_coding
IV	12899806	C	[G]	{C, G}	0.0454545	1	TRUE	FALSE	FALSE	0.0874393	66	0	3	63	G	missense_variant	MODERATE	K08D8.9	WBGene00194918	transcript	K08D8.9	protein_coding
IV	12899835	A	[G]	{G, A}	0.0151515	1	TRUE	FALSE	TRUE	0.0300717	66	0	1	65	G	missense_variant	MODERATE	K08D8.9	WBGene00194918	transcript	K08D8.9	protein_coding
IV	12899879	A	[G]	{G, A}	0.0151515	1	TRUE	FALSE	TRUE	0.0300717	66	0	1	65	G	missense_variant	MODERATE	K08D8.9	WBGene00194918	transcript	K08D8.9	protein_coding
IV	12899961	C	[T]	{C, T}	0.0151515	1	TRUE	FALSE	TRUE	0.0300717	66	0	1	65	T	missense_variant	MODERATE	K08D8.9	WBGene00194918	transcript	K08D8.9	protein_coding
IV	12900676	A	[T]	{A, T}	0.0151515	1	TRUE	FALSE	FALSE	0.0300717	66	0	1	65	T	missense_variant	MODERATE	K08D8.10	WBGene00194919	transcript	K08D8.10	protein_coding
IV	12900876	G	[T]	{G, T}	0.0151515	1	TRUE	FALSE	FALSE	0.0300717	66	0	1	65	T	missense_variant	MODERATE	K08D8.10	WBGene00194919	transcript	K08D8.10	protein_coding
IV	12900877	T	[C]	{C, T}	0.0151515	1	TRUE	FALSE	TRUE	0.0300717	66	0	1	65	C	missense_variant	MODERATE	K08D8.10	WBGene00194919	transcript	K08D8.10	protein_coding
IV	12903283	C	[G]	{C, G}	0.0757576	1	TRUE	FALSE	FALSE	0.141106	66	0	5	61	G	missense_variant	MODERATE	K08D8.2	WBGene00010656	transcript	K08D8.2	protein_coding
IV	12903313	A	[G]	{G, A}	0.242424	1	TRUE	FALSE	TRUE	0.370113	66	0	16	50	G	missense_variant	MODERATE	K08D8.2	WBGene00010656	transcript	K08D8.2	protein_coding
IV	12903553	A	[G]	{G, A}	0.0909091	1	TRUE	FALSE	TRUE	0.166551	66	0	6	60	G	missense_variant	MODERATE	K08D8.2	WBGene00010656	transcript	K08D8.2	protein_coding
IV	12903559	A	[G]	{G, A}	0.0151515	1	TRUE	FALSE	TRUE	0.0300717	66	0	1	65	G	missense_variant	MODERATE	K08D8.2	WBGene00010656	transcript	K08D8.2	protein_coding
IV	12903576	A	[G]	{G, A}	0.0151515	1	TRUE	FALSE	TRUE	0.0300717	66	0	1	65	G	missense_variant	MODERATE	K08D8.2	WBGene00010656	transcript	K08D8.2	protein_coding
IV	12903640	G	[C]	{C, G}	0.030303	1	TRUE	FALSE	FALSE	0.0592181	66	0	2	64	C	missense_variant	MODERATE	K08D8.2	WBGene00010656	transcript	K08D8.2	protein_coding
IV	12904212	G	[A]	{G, A}	0.0151515	1	TRUE	FALSE	TRUE	0.0300717	66	0	1	65	A	missense_variant	MODERATE	K08D8.3	WBGene00010657	transcript	K08D8.3	protein_coding
IV	12904225	C	[G]	{C, G}	0.0757576	1	TRUE	FALSE	FALSE	0.141106	66	0	5	61	G	missense_variant	MODERATE	K08D8.3	WBGene00010657	transcript	K08D8.3	protein_coding
IV	12904297	G	[T]	{G, T}	0.0909091	1	TRUE	FALSE	FALSE	0.166551	66	0	6	60	T	missense_variant	MODERATE	K08D8.3	WBGene00010657	transcript	K08D8.3	protein_coding
IV	12904342	A	[T]	{A, T}	0.0151515	1	TRUE	FALSE	FALSE	0.0300717	66	0	1	65	T	missense_variant	MODERATE	K08D8.3	WBGene00010657	transcript	K08D8.3	protein_coding
IV	12904367	G	[C]	{C, G}	0.0454545	1	TRUE	FALSE	FALSE	0.0874393	66	0	3	63	C	missense_variant	MODERATE	K08D8.3	WBGene00010657	transcript	K08D8.3	protein_coding
IV	12904727	C	[T]	{C, T}	0.0151515	1	TRUE	FALSE	TRUE	0.0300717	66	0	1	65	T	missense_variant	MODERATE	K08D8.3	WBGene00010657	transcript	K08D8.3	protein_coding
IV	12905360	G	[A]	{G, A}	0.0151515	1	TRUE	FALSE	TRUE	0.0300717	66	0	1	65	A	missense_variant	MODERATE	K08D8.3	WBGene00010657	transcript	K08D8.3	protein_coding
IV	12905465	T	[C]	{C, T}	0.0454545	1	TRUE	FALSE	TRUE	0.0874393	66	0	3	63	C	missense_variant	MODERATE	K08D8.3	WBGene00010657	transcript	K08D8.3	protein_coding
IV	12905499	T	[G]	{G, T}	0.0151515	1	TRUE	FALSE	FALSE	0.0300717	66	0	1	65	G	missense_variant	MODERATE	K08D8.3	WBGene00010657	transcript	K08D8.3	protein_coding
IV	12905668	GAGT	[G]	{G, GAGT}	0.189394	1	FALSE	TRUE	FALSE	0.309392	66	3	11	52	G	disruptive_inframe_deletion	MODERATE	K08D8.3	WBGene00010657	transcript	K08D8.3	protein_coding
IV	12906067	G	[A]	{G, A}	0.0151515	1	TRUE	FALSE	TRUE	0.0300717	66	0	1	65	A	missense_variant	MODERATE	K08D8.3	WBGene00010657	transcript	K08D8.3	protein_coding
IV	12906074	G	[T]	{G, T}	0.0151515	1	TRUE	FALSE	FALSE	0.0300717	66	0	1	65	T	missense_variant	MODERATE	K08D8.3	WBGene00010657	transcript	K08D8.3	protein_coding
IV	12906401	A	[C]	{C, A}	0.0769231	0.984848	TRUE	FALSE	FALSE	0.143113	65	0	5	60	C	missense_variant	MODERATE	K08D8.3	WBGene00010657	transcript	K08D8.3	protein_coding
IV	12906516	T	[C]	{C, T}	0.0769231	0.984848	TRUE	FALSE	TRUE	0.143113	65	0	5	60	C	missense_variant	MODERATE	K08D8.3	WBGene00010657	transcript	K08D8.3	protein_coding
IV	12906575	G	[T]	{G, T}	0.0153846	0.984848	TRUE	FALSE	FALSE	0.0305307	65	0	1	64	T	missense_variant	MODERATE	K08D8.3	WBGene00010657	transcript	K08D8.3	protein_coding
IV	12907557	A	[G]	{G, A}	0.0151515	1	TRUE	FALSE	TRUE	0.0300717	66	0	1	65	G	missense_variant	MODERATE	K08D8.4	WBGene00010658	transcript	K08D8.4a.1	protein_coding
IV	12907771	T	[G]	{G, T}	0.0454545	1	TRUE	FALSE	FALSE	0.0874393	66	0	3	63	G	missense_variant	MODERATE	K08D8.4	WBGene00010658	transcript	K08D8.4a.1	protein_coding
IV	12907797	G	[A]	{G, A}	0.030303	1	TRUE	FALSE	TRUE	0.0592181	66	0	2	64	A	missense_variant	MODERATE	K08D8.4	WBGene00010658	transcript	K08D8.4a.1	protein_coding
IV	12908291	C	[A]	{C, A}	0.227273	1	TRUE	FALSE	FALSE	0.353921	66	0	15	51	A	missense_variant	MODERATE	K08D8.4	WBGene00010658	transcript	K08D8.4a.1	protein_coding
IV	12908344	A	[G]	{G, A}	0.0151515	1	TRUE	FALSE	TRUE	0.0300717	66	0	1	65	G	missense_variant	MODERATE	K08D8.4	WBGene00010658	transcript	K08D8.4a.1	protein_coding
IV	12908506	C	[G]	{C, G}	0.227273	1	TRUE	FALSE	FALSE	0.353921	66	0	15	51	G	missense_variant	MODERATE	K08D8.4	WBGene00010658	transcript	K08D8.4a.1	protein_coding
IV	12908508	G	[C, T]	{C, G, T}	0.121212	1	TRUE	FALSE	FALSE	0.214666	66	0	8	58	C	missense_variant	MODERATE	K08D8.4	WBGene00010658	transcript	K08D8.4a.1	protein_coding
IV	12909247	T	[C]	{C, T}	0.0757576	1	TRUE	FALSE	TRUE	0.141106	66	0	5	61	C	missense_variant	MODERATE	K08D8.4	WBGene00010658	transcript	K08D8.4a.1	protein_coding
IV	12909304	G	[C]	{C, G}	0.030303	1	TRUE	FALSE	FALSE	0.0592181	66	0	2	64	C	missense_variant	MODERATE	K08D8.4	WBGene00010658	transcript	K08D8.4a.1	protein_coding
IV	12909387	C	[A]	{C, A}	0.0757576	1	TRUE	FALSE	FALSE	0.141106	66	0	5	61	A	missense_variant	MODERATE	K08D8.4	WBGene00010658	transcript	K08D8.4a.1	protein_coding
IV	12909470	A	[T]	{A, T}	0.0909091	1	TRUE	FALSE	FALSE	0.166551	66	0	6	60	T	missense_variant	MODERATE	K08D8.4	WBGene00010658	transcript	K08D8.4a.1	protein_coding
IV	12909585	G	[T]	{G, T}	0.030303	1	TRUE	FALSE	FALSE	0.0592181	66	0	2	64	T	missense_variant	MODERATE	K08D8.4	WBGene00010658	transcript	K08D8.4a.1	protein_coding
IV	12909768	G	[A]	{G, A}	0.0151515	1	TRUE	FALSE	TRUE	0.0300717	66	0	1	65	A	missense_variant	MODERATE	K08D8.4	WBGene00010658	transcript	K08D8.4a.1	protein_coding
IV	12909810	A	[T, G]	{G, A, T}	0.121212	1	TRUE	FALSE	FALSE	0.214666	66	0	8	58	G	missense_variant	MODERATE	K08D8.4	WBGene00010658	transcript	K08D8.4a.1	protein_coding
IV	12909954	G	[A]	{G, A}	0.0454545	1	TRUE	FALSE	TRUE	0.0874393	66	0	3	63	A	missense_variant	MODERATE	K08D8.4	WBGene00010658	transcript	K08D8.4a.1	protein_coding
IV	12910958	C	[T]	{C, T}	0.0151515	1	TRUE	FALSE	TRUE	0.0300717	66	0	1	65	T	missense_variant	MODERATE	K08D8.5	WBGene00010659	transcript	K08D8.5	protein_coding
IV	12910999	T	[C]	{C, T}	0.0454545	1	TRUE	FALSE	TRUE	0.0874393	66	0	3	63	C	missense_variant	MODERATE	K08D8.5	WBGene00010659	transcript	K08D8.5	protein_coding
IV	12911343	T	[C]	{C, T}	0.0151515	1	TRUE	FALSE	TRUE	0.0300717	66	0	1	65	C	missense_variant	MODERATE	K08D8.5	WBGene00010659	transcript	K08D8.5	protein_coding
IV	12911796	T	[C]	{C, T}	0.0151515	1	TRUE	FALSE	TRUE	0.0300717	66	0	1	65	C	missense_variant&splice_region_variant	MODERATE	K08D8.5	WBGene00010659	transcript	K08D8.5	protein_coding
IV	12911818	A	[G]	{G, A}	0.0151515	1	TRUE	FALSE	TRUE	0.0300717	66	0	1	65	G	missense_variant	MODERATE	K08D8.5	WBGene00010659	transcript	K08D8.5	protein_coding
IV	12911991	A	[G]	{G, A}	0.242424	1	TRUE	FALSE	TRUE	0.370113	66	0	16	50	G	missense_variant	MODERATE	K08D8.5	WBGene00010659	transcript	K08D8.5	protein_coding
IV	12912096	G	[A]	{G, A}	0.0454545	1	TRUE	FALSE	TRUE	0.0874393	66	0	3	63	A	missense_variant	MODERATE	K08D8.5	WBGene00010659	transcript	K08D8.5	protein_coding
IV	12912106	A	[G]	{G, A}	0.0606061	1	TRUE	FALSE	TRUE	0.114735	66	0	4	62	G	missense_variant	MODERATE	K08D8.5	WBGene00010659	transcript	K08D8.5	protein_coding
IV	12912807	G	[A]	{G, A}	0.19697	1	TRUE	FALSE	TRUE	0.31876	66	0	13	53	A	missense_variant	MODERATE	irg-6	WBGene00007864	transcript	C32H11.1a	protein_coding
IV	12913657	G	[T]	{G, T}	0.0454545	1	TRUE	FALSE	FALSE	0.0874393	66	0	3	63	T	missense_variant&splice_region_variant	MODERATE	irg-6	WBGene00007864	transcript	C32H11.1a	protein_coding
IV	12914116	C	[T]	{C, T}	0.0151515	1	TRUE	FALSE	TRUE	0.0300717	66	0	1	65	T	missense_variant	MODERATE	irg-6	WBGene00007864	transcript	C32H11.1a	protein_coding
IV	12914248	T	[G]	{G, T}	0.0757576	1	TRUE	FALSE	FALSE	0.141106	66	0	5	61	G	missense_variant	MODERATE	irg-6	WBGene00007864	transcript	C32H11.1a	protein_coding
IV	12914286	G	[A]	{G, A}	0.030303	1	TRUE	FALSE	TRUE	0.0592181	66	0	2	64	A	missense_variant	MODERATE	irg-6	WBGene00007864	transcript	C32H11.1a	protein_coding
IV	12914516	G	[A]	{G, A}	0.0151515	1	TRUE	FALSE	TRUE	0.0300717	66	0	1	65	A	missense_variant	MODERATE	irg-6	WBGene00007864	transcript	C32H11.1a	protein_coding
IV	12914761	G	[A]	{G, A}	0.0151515	1	TRUE	FALSE	TRUE	0.0300717	66	0	1	65	A	missense_variant	MODERATE	irg-6	WBGene00007864	transcript	C32H11.1a	protein_coding
IV	12916091	A	[G]	{G, A}	0.030303	1	TRUE	FALSE	TRUE	0.0592181	66	0	2	64	G	missense_variant	MODERATE	srz-15	WBGene00007865	transcript	C32H11.2	protein_coding
IV	12916113	C	[T]	{C, T}	0.0151515	1	TRUE	FALSE	TRUE	0.0300717	66	0	1	65	T	missense_variant	MODERATE	srz-15	WBGene00007865	transcript	C32H11.2	protein_coding
IV	12916464	T	[C]	{C, T}	0.0454545	1	TRUE	FALSE	TRUE	0.0874393	66	0	3	63	C	missense_variant	MODERATE	srz-15	WBGene00007865	transcript	C32H11.2	protein_coding
IV	12916515	T	[C]	{C, T}	0.0151515	1	TRUE	FALSE	TRUE	0.0300717	66	0	1	65	C	missense_variant	MODERATE	srz-15	WBGene00007865	transcript	C32H11.2	protein_coding
IV	12916533	G	[A]	{G, A}	0.0757576	1	TRUE	FALSE	TRUE	0.141106	66	0	5	61	A	missense_variant	MODERATE	srz-15	WBGene00007865	transcript	C32H11.2	protein_coding
IV	12917049	T	[C]	{C, T}	0.0454545	1	TRUE	FALSE	TRUE	0.0874393	66	0	3	63	C	missense_variant	MODERATE	srz-15	WBGene00007865	transcript	C32H11.2	protein_coding
IV	12917256	A	[G]	{G, A}	0.030303	1	TRUE	FALSE	TRUE	0.0592181	66	0	2	64	G	missense_variant	MODERATE	srz-15	WBGene00007865	transcript	C32H11.2	protein_coding
IV	12918614	TTCA	[T]	{T, TTCA}	0.0454545	1	FALSE	TRUE	FALSE	0.0874393	66	0	3	63	T	disruptive_inframe_deletion	MODERATE	C32H11.3	WBGene00007866	transcript	C32H11.3	protein_coding
IV	12918636	C	[G]	{C, G}	0.0606061	1	TRUE	FALSE	FALSE	0.114735	66	0	4	62	G	missense_variant	MODERATE	C32H11.3	WBGene00007866	transcript	C32H11.3	protein_coding
IV	12918801	C	[T]	{C, T}	0.030303	1	TRUE	FALSE	TRUE	0.0592181	66	0	2	64	T	missense_variant	MODERATE	C32H11.3	WBGene00007866	transcript	C32H11.3	protein_coding
IV	12919451	A	[G]	{G, A}	0.0151515	1	TRUE	FALSE	TRUE	0.0300717	66	0	1	65	G	missense_variant	MODERATE	C32H11.3	WBGene00007866	transcript	C32H11.3	protein_coding
IV	12919881	A	[C]	{C, A}	0.0454545	1	TRUE	FALSE	FALSE	0.0874393	66	0	3	63	C	missense_variant	MODERATE	C32H11.3	WBGene00007866	transcript	C32H11.3	protein_coding
IV	12919933	G	[A]	{G, A}	0.030303	1	TRUE	FALSE	TRUE	0.0592181	66	0	2	64	A	missense_variant	MODERATE	C32H11.3	WBGene00007866	transcript	C32H11.3	protein_coding
IV	12921517	A	[G]	{G, A}	0.0151515	1	TRUE	FALSE	TRUE	0.0300717	66	0	1	65	G	missense_variant	MODERATE	C32H11.4	WBGene00007867	transcript	C32H11.4	protein_coding
IV	12921791	A	[T]	{A, T}	0.0454545	1	TRUE	FALSE	FALSE	0.0874393	66	0	3	63	T	missense_variant	MODERATE	C32H11.4	WBGene00007867	transcript	C32H11.4	protein_coding
IV	12922796	A	[T]	{A, T}	0.0909091	1	TRUE	FALSE	FALSE	0.166551	66	0	6	60	T	missense_variant&splice_region_variant	MODERATE	C32H11.4	WBGene00007867	transcript	C32H11.4	protein_coding
IV	12923033	G	[C]	{C, G}	0.242424	1	TRUE	FALSE	FALSE	0.370113	66	0	16	50	C	missense_variant	MODERATE	C32H11.4	WBGene00007867	transcript	C32H11.4	protein_coding
IV	12923035	T	[C]	{C, T}	0.151515	1	TRUE	FALSE	TRUE	0.259079	66	0	10	56	C	missense_variant	MODERATE	C32H11.4	WBGene00007867	transcript	C32H11.4	protein_coding
IV	12923681	A	[G]	{G, A}	0.0909091	1	TRUE	FALSE	TRUE	0.166551	66	0	6	60	G	missense_variant	MODERATE	C32H11.5	WBGene00007868	transcript	C32H11.5.1	protein_coding
IV	12923911	C	[A]	{C, A}	0.0454545	1	TRUE	FALSE	FALSE	0.0874393	66	0	3	63	A	missense_variant	MODERATE	C32H11.5	WBGene00007868	transcript	C32H11.5.1	protein_coding
IV	12923936	T	[C]	{C, T}	0.0151515	1	TRUE	FALSE	TRUE	0.0300717	66	0	1	65	C	missense_variant	MODERATE	C32H11.5	WBGene00007868	transcript	C32H11.5.1	protein_coding
IV	12926014	G	[A]	{G, A}	0.439394	1	TRUE	FALSE	TRUE	0.496415	66	0	29	37	A	missense_variant	MODERATE	C32H11.6	WBGene00007869	transcript	C32H11.6	protein_coding
IV	12926027	C	[A]	{C, A}	0.212121	1	TRUE	FALSE	FALSE	0.336803	66	0	14	52	A	missense_variant	MODERATE	C32H11.6	WBGene00007869	transcript	C32H11.6	protein_coding
IV	12926612	G	[T]	{G, T}	0.015625	0.969697	TRUE	FALSE	FALSE	0.0310039	64	0	1	63	T	missense_variant	MODERATE	C32H11.6	WBGene00007869	transcript	C32H11.6	protein_coding
IV	12936199	C	[T]	{C, T}	0.0757576	1	TRUE	FALSE	TRUE	0.141106	66	0	5	61	T	missense_variant	MODERATE	C32H11.9	WBGene00007872	transcript	C32H11.9	protein_coding
IV	12936229	A	[G]	{G, A}	0.0923077	0.984848	TRUE	FALSE	TRUE	0.168873	65	0	6	59	G	missense_variant	MODERATE	C32H11.9	WBGene00007872	transcript	C32H11.9	protein_coding
IV	12936770	T	[C]	{C, T}	0.0151515	1	TRUE	FALSE	TRUE	0.0300717	66	0	1	65	C	missense_variant	MODERATE	dod-21	WBGene00007873	transcript	C32H11.10	protein_coding
IV	12940267	C	[T]	{C, T}	0.0151515	1	TRUE	FALSE	TRUE	0.0300717	66	0	1	65	T	missense_variant	MODERATE	dod-24	WBGene00007875	transcript	C32H11.12	protein_coding
IV	12940296	T	[C]	{C, T}	0.030303	1	TRUE	FALSE	TRUE	0.0592181	66	0	2	64	C	missense_variant	MODERATE	dod-24	WBGene00007875	transcript	C32H11.12	protein_coding
IV	12940410	C	[A]	{C, A}	0.0151515	1	TRUE	FALSE	FALSE	0.0300717	66	0	1	65	A	missense_variant	MODERATE	dod-24	WBGene00007875	transcript	C32H11.12	protein_coding
IV	12940431	C	[T]	{C, T}	0.0454545	1	TRUE	FALSE	TRUE	0.0874393	66	0	3	63	T	missense_variant	MODERATE	dod-24	WBGene00007875	transcript	C32H11.12	protein_coding
IV	12940620	C	[T]	{C, T}	0.0151515	1	TRUE	FALSE	TRUE	0.0300717	66	0	1	65	T	missense_variant	MODERATE	dod-24	WBGene00007875	transcript	C32H11.12	protein_coding
IV	12940715	G	[A]	{G, A}	0.0151515	1	TRUE	FALSE	TRUE	0.0300717	66	0	1	65	A	missense_variant	MODERATE	dod-24	WBGene00007875	transcript	C32H11.12	protein_coding
IV	12943060	T	[C]	{C, T}	0.0151515	1	TRUE	FALSE	TRUE	0.0300717	66	0	1	65	C	missense_variant	MODERATE	dct-19	WBGene00007876	transcript	C32H11.13	protein_coding
IV	12943197	A	[T, G]	{G, A, T}	0.0757576	1	TRUE	FALSE	FALSE	0.141106	66	0	5	61	G	missense_variant	MODERATE	dct-19	WBGene00007876	transcript	C32H11.13	protein_coding
IV	12943264	C	[T]	{C, T}	0.0454545	1	TRUE	FALSE	TRUE	0.0874393	66	0	3	63	T	missense_variant	MODERATE	dct-19	WBGene00007876	transcript	C32H11.13	protein_coding
IV	12943498	A	[G]	{G, A}	0.0151515	1	TRUE	FALSE	TRUE	0.0300717	66	0	1	65	G	missense_variant	MODERATE	dct-19	WBGene00007876	transcript	C32H11.13	protein_coding
IV	12943504	T	[A]	{A, T}	0.0151515	1	TRUE	FALSE	FALSE	0.0300717	66	0	1	65	A	missense_variant	MODERATE	dct-19	WBGene00007876	transcript	C32H11.13	protein_coding
IV	12943561	C	[A]	{C, A}	0.0454545	1	TRUE	FALSE	FALSE	0.0874393	66	0	3	63	A	missense_variant	MODERATE	dct-19	WBGene00007876	transcript	C32H11.13	protein_coding
IV	12943570	T	[G]	{G, T}	0.0454545	1	TRUE	FALSE	FALSE	0.0874393	66	0	3	63	G	missense_variant	MODERATE	dct-19	WBGene00007876	transcript	C32H11.13	protein_coding
IV	12943584	A	[G]	{G, A}	0.0454545	1	TRUE	FALSE	TRUE	0.0874393	66	0	3	63	G	missense_variant	MODERATE	dct-19	WBGene00007876	transcript	C32H11.13	protein_coding
IV	12943649	C	[T]	{C, T}	0.0454545	1	TRUE	FALSE	TRUE	0.0874393	66	0	3	63	T	missense_variant	MODERATE	dct-19	WBGene00007876	transcript	C32H11.13	protein_coding
IV	12943683	C	[T]	{C, T}	0.0454545	1	TRUE	FALSE	TRUE	0.0874393	66	0	3	63	T	missense_variant	MODERATE	dct-19	WBGene00007876	transcript	C32H11.13	protein_coding
IV	12943688	T	[C]	{C, T}	0.257576	1	TRUE	FALSE	TRUE	0.385381	66	0	17	49	C	missense_variant	MODERATE	dct-19	WBGene00007876	transcript	C32H11.13	protein_coding
IV	12943970	G	[C]	{C, G}	0.0151515	1	TRUE	FALSE	FALSE	0.0300717	66	0	1	65	C	missense_variant	MODERATE	dct-19	WBGene00007876	transcript	C32H11.13	protein_coding
IV	12944095	G	[A]	{G, A}	0.0151515	1	TRUE	FALSE	TRUE	0.0300717	66	0	1	65	A	missense_variant	MODERATE	dct-19	WBGene00007876	transcript	C32H11.13	protein_coding
IV	12944100	G	[A]	{G, A}	0.0454545	1	TRUE	FALSE	TRUE	0.0874393	66	0	3	63	A	missense_variant	MODERATE	dct-19	WBGene00007876	transcript	C32H11.13	protein_coding
IV	12944110	C	[T]	{C, T}	0.030303	1	TRUE	FALSE	TRUE	0.0592181	66	0	2	64	T	missense_variant	MODERATE	dct-19	WBGene00007876	transcript	C32H11.13	protein_coding
IV	12944279	A	[T]	{A, T}	0.0454545	1	TRUE	FALSE	FALSE	0.0874393	66	0	3	63	T	missense_variant	MODERATE	dct-19	WBGene00007876	transcript	C32H11.13	protein_coding
IV	12944398	G	[T, A]	{G, A, T}	0.0606061	1	TRUE	FALSE	FALSE	0.114735	66	0	4	62	A	missense_variant	MODERATE	dct-19	WBGene00007876	transcript	C32H11.13	protein_coding
IV	12945251	A	[G]	{G, A}	0.0454545	1	TRUE	FALSE	TRUE	0.0874393	66	0	3	63	G	missense_variant	MODERATE	F55G11.1	WBGene00010122	transcript	F55G11.1	protein_coding
IV	12945283	T	[C]	{C, T}	0.151515	1	TRUE	FALSE	TRUE	0.259079	66	0	10	56	C	missense_variant	MODERATE	F55G11.1	WBGene00010122	transcript	F55G11.1	protein_coding
IV	12945636	G	[A]	{G, A}	0.0454545	1	TRUE	FALSE	TRUE	0.0874393	66	0	3	63	A	missense_variant	MODERATE	F55G11.1	WBGene00010122	transcript	F55G11.1	protein_coding
IV	12945643	T	[C]	{C, T}	0.0151515	1	TRUE	FALSE	TRUE	0.0300717	66	0	1	65	C	missense_variant	MODERATE	F55G11.1	WBGene00010122	transcript	F55G11.1	protein_coding
IV	12945727	T	[G]	{G, T}	0.0454545	1	TRUE	FALSE	FALSE	0.0874393	66	0	3	63	G	missense_variant	MODERATE	F55G11.1	WBGene00010122	transcript	F55G11.1	protein_coding
IV	12945766	G	[A]	{G, A}	0.030303	1	TRUE	FALSE	TRUE	0.0592181	66	0	2	64	A	missense_variant	MODERATE	F55G11.1	WBGene00010122	transcript	F55G11.1	protein_coding
IV	12945843	A	[G]	{G, A}	0.0454545	1	TRUE	FALSE	TRUE	0.0874393	66	0	3	63	G	missense_variant&splice_region_variant	MODERATE	F55G11.1	WBGene00010122	transcript	F55G11.1	protein_coding
IV	12945975	G	[T]	{G, T}	0.171875	0.969697	TRUE	FALSE	FALSE	0.286909	64	0	11	53	T	missense_variant	MODERATE	F55G11.1	WBGene00010122	transcript	F55G11.1	protein_coding
IV	12946063	T	[G]	{G, T}	0.151515	1	TRUE	FALSE	FALSE	0.259079	66	0	10	56	G	missense_variant	MODERATE	F55G11.1	WBGene00010122	transcript	F55G11.1	protein_coding
IV	12946192	TACC	[T]	{TACC, T}	0.030303	1	FALSE	TRUE	FALSE	0.0592181	66	2	1	63	T	disruptive_inframe_deletion	MODERATE	F55G11.1	WBGene00010122	transcript	F55G11.1	protein_coding
IV	12946193	A	[G]	{G, A}	0.0454545	1	TRUE	FALSE	TRUE	0.0874393	66	0	3	63	G	missense_variant	MODERATE	F55G11.1	WBGene00010122	transcript	F55G11.1	protein_coding
IV	12946253	T	[C]	{C, T}	0.0151515	1	TRUE	FALSE	TRUE	0.0300717	66	0	1	65	C	missense_variant&splice_region_variant	MODERATE	F55G11.1	WBGene00010122	transcript	F55G11.1	protein_coding
IV	12946374	A	[C, T]	{C, A, T}	0.257576	1	TRUE	FALSE	FALSE	0.385381	66	0	17	49	C	missense_variant	MODERATE	F55G11.1	WBGene00010122	transcript	F55G11.1	protein_coding
IV	12946555	A	[G]	{G, A}	0.0151515	1	TRUE	FALSE	TRUE	0.0300717	66	0	1	65	G	missense_variant	MODERATE	F55G11.1	WBGene00010122	transcript	F55G11.1	protein_coding
IV	12948965	G	[T]	{G, T}	0.0151515	1	TRUE	FALSE	FALSE	0.0300717	66	0	1	65	T	missense_variant	MODERATE	F55G11.10	WBGene00010129	transcript	F55G11.10	protein_coding
IV	12949012	A	[G]	{G, A}	0.030303	1	TRUE	FALSE	TRUE	0.0592181	66	0	2	64	G	missense_variant	MODERATE	F55G11.10	WBGene00010129	transcript	F55G11.10	protein_coding
IV	12949035	C	[T]	{C, T}	0.107692	0.984848	TRUE	FALSE	TRUE	0.193679	65	0	7	58	T	missense_variant	MODERATE	F55G11.10	WBGene00010129	transcript	F55G11.10	protein_coding
IV	12949079	A	[C]	{C, A}	0.0461538	0.984848	TRUE	FALSE	FALSE	0.0887299	65	0	3	62	C	missense_variant	MODERATE	F55G11.10	WBGene00010129	transcript	F55G11.10	protein_coding
IV	12949153	T	[C]	{C, T}	0.0153846	0.984848	TRUE	FALSE	TRUE	0.0305307	65	0	1	64	C	missense_variant	MODERATE	F55G11.10	WBGene00010129	transcript	F55G11.10	protein_coding
IV	12949268	T	[C]	{C, T}	0.0307692	0.984848	TRUE	FALSE	TRUE	0.0601073	65	0	2	63	C	missense_variant	MODERATE	F55G11.10	WBGene00010129	transcript	F55G11.10	protein_coding
IV	12949532	T	[A]	{A, T}	0.0615385	0.984848	TRUE	FALSE	FALSE	0.116398	65	0	4	61	A	missense_variant	MODERATE	F55G11.10	WBGene00010129	transcript	F55G11.10	protein_coding
IV	12949896	T	[A]	{A, T}	0.0151515	1	TRUE	FALSE	FALSE	0.0300717	66	0	1	65	A	missense_variant	MODERATE	F55G11.10	WBGene00010129	transcript	F55G11.10	protein_coding
IV	12949927	G	[C]	{C, G}	0.0151515	1	TRUE	FALSE	FALSE	0.0300717	66	0	1	65	C	missense_variant	MODERATE	F55G11.10	WBGene00010129	transcript	F55G11.10	protein_coding
IV	12949932	A	[G]	{G, A}	0.0151515	1	TRUE	FALSE	TRUE	0.0300717	66	0	1	65	G	missense_variant	MODERATE	F55G11.10	WBGene00010129	transcript	F55G11.10	protein_coding
IV	12949975	T	[A]	{A, T}	0.0151515	1	TRUE	FALSE	FALSE	0.0300717	66	0	1	65	A	missense_variant	MODERATE	F55G11.10	WBGene00010129	transcript	F55G11.10	protein_coding
IV	12949981	T	[C]	{C, T}	0.0151515	1	TRUE	FALSE	TRUE	0.0300717	66	0	1	65	C	missense_variant	MODERATE	F55G11.10	WBGene00010129	transcript	F55G11.10	protein_coding
IV	12949993	G	[C]	{C, G}	0.0151515	1	TRUE	FALSE	FALSE	0.0300717	66	0	1	65	C	missense_variant	MODERATE	F55G11.10	WBGene00010129	transcript	F55G11.10	protein_coding
IV	12958565	A	[T]	{A, T}	0.0606061	1	TRUE	FALSE	FALSE	0.114735	66	0	4	62	T	missense_variant	MODERATE	F55G11.6	WBGene00010126	transcript	F55G11.6	protein_coding
IV	12958804	T	[C]	{C, T}	0.272727	1	TRUE	FALSE	TRUE	0.399722	66	0	18	48	C	missense_variant	MODERATE	F55G11.6	WBGene00010126	transcript	F55G11.6	protein_coding
IV	12958866	G	[A]	{G, A}	0.0151515	1	TRUE	FALSE	TRUE	0.0300717	66	0	1	65	A	missense_variant	MODERATE	F55G11.6	WBGene00010126	transcript	F55G11.6	protein_coding
IV	12958900	C	[T]	{C, T}	0.0151515	1	TRUE	FALSE	TRUE	0.0300717	66	0	1	65	T	missense_variant	MODERATE	F55G11.6	WBGene00010126	transcript	F55G11.6	protein_coding
IV	12961096	C	[G]	{C, G}	0.030303	1	TRUE	FALSE	FALSE	0.0592181	66	0	2	64	G	missense_variant	MODERATE	F55G11.7	WBGene00010127	transcript	F55G11.7.1	protein_coding
IV	12961346	T	[G]	{G, T}	0.0606061	1	TRUE	FALSE	FALSE	0.114735	66	0	4	62	G	missense_variant	MODERATE	F55G11.7	WBGene00010127	transcript	F55G11.7.1	protein_coding
IV	12961552	G	[T]	{G, T}	0.0606061	1	TRUE	FALSE	FALSE	0.114735	66	0	4	62	T	missense_variant	MODERATE	F55G11.7	WBGene00010127	transcript	F55G11.7.1	protein_coding
IV	12961754	A	[C]	{C, A}	0.030303	1	TRUE	FALSE	FALSE	0.0592181	66	0	2	64	C	missense_variant	MODERATE	F55G11.7	WBGene00010127	transcript	F55G11.7.1	protein_coding
IV	12961796	A	[T]	{A, T}	0.0454545	1	TRUE	FALSE	FALSE	0.0874393	66	0	3	63	T	missense_variant	MODERATE	F55G11.7	WBGene00010127	transcript	F55G11.7.1	protein_coding
IV	12961950	G	[T]	{G, T}	0.0454545	1	TRUE	FALSE	FALSE	0.0874393	66	0	3	63	T	missense_variant	MODERATE	F55G11.7	WBGene00010127	transcript	F55G11.7.1	protein_coding
IV	12962058	C	[A]	{C, A}	0.0454545	1	TRUE	FALSE	FALSE	0.0874393	66	0	3	63	A	missense_variant	MODERATE	F55G11.7	WBGene00010127	transcript	F55G11.7.1	protein_coding
IV	12962064	C	[G]	{C, G}	0.0454545	1	TRUE	FALSE	FALSE	0.0874393	66	0	3	63	G	missense_variant	MODERATE	F55G11.7	WBGene00010127	transcript	F55G11.7.1	protein_coding
IV	12962065	C	[A]	{C, A}	0.0454545	1	TRUE	FALSE	FALSE	0.0874393	66	0	3	63	A	missense_variant	MODERATE	F55G11.7	WBGene00010127	transcript	F55G11.7.1	protein_coding
IV	12962067	T	[G]	{G, T}	0.0454545	1	TRUE	FALSE	FALSE	0.0874393	66	0	3	63	G	missense_variant	MODERATE	F55G11.7	WBGene00010127	transcript	F55G11.7.1	protein_coding
IV	12962942	T	[G]	{G, T}	0.030303	1	TRUE	FALSE	FALSE	0.0592181	66	0	2	64	G	missense_variant&splice_region_variant	MODERATE	F55G11.8	WBGene00010128	transcript	F55G11.8	protein_coding
IV	12963154	G	[C]	{C, G}	0.030303	1	TRUE	FALSE	FALSE	0.0592181	66	0	2	64	C	missense_variant	MODERATE	F55G11.8	WBGene00010128	transcript	F55G11.8	protein_coding
IV	12963213	A	[G]	{G, A}	0.0606061	1	TRUE	FALSE	TRUE	0.114735	66	0	4	62	G	missense_variant	MODERATE	F55G11.8	WBGene00010128	transcript	F55G11.8	protein_coding
IV	12963575	T	[A]	{A, T}	0.166667	1	TRUE	FALSE	FALSE	0.279898	66	0	11	55	A	missense_variant	MODERATE	F55G11.8	WBGene00010128	transcript	F55G11.8	protein_coding
IV	12963607	C	[T]	{C, T}	0.0151515	1	TRUE	FALSE	TRUE	0.0300717	66	0	1	65	T	missense_variant&splice_region_variant	MODERATE	F55G11.8	WBGene00010128	transcript	F55G11.8	protein_coding
IV	12963768	C	[T]	{C, T}	0.0151515	1	TRUE	FALSE	TRUE	0.0300717	66	0	1	65	T	missense_variant	MODERATE	F55G11.8	WBGene00010128	transcript	F55G11.8	protein_coding
IV	12964154	G	[A]	{G, A}	0.0151515	1	TRUE	FALSE	TRUE	0.0300717	66	0	1	65	A	missense_variant	MODERATE	F55G11.8	WBGene00010128	transcript	F55G11.8	protein_coding
IV	12966339	A	[G]	{G, A}	0.257576	1	TRUE	FALSE	TRUE	0.385381	66	0	17	49	G	missense_variant	MODERATE	dod-22	WBGene00010125	transcript	F55G11.5a	protein_coding
IV	12966401	G	[A]	{G, A}	0.030303	1	TRUE	FALSE	TRUE	0.0592181	66	0	2	64	A	missense_variant	MODERATE	dod-22	WBGene00010125	transcript	F55G11.5a	protein_coding
IV	12966838	G	[A]	{G, A}	0.030303	1	TRUE	FALSE	TRUE	0.0592181	66	0	2	64	A	missense_variant	MODERATE	dod-22	WBGene00010125	transcript	F55G11.5a	protein_coding
IV	12966870	A	[C]	{C, A}	0.0606061	1	TRUE	FALSE	FALSE	0.114735	66	0	4	62	C	missense_variant	MODERATE	dod-22	WBGene00010125	transcript	F55G11.5a	protein_coding
IV	12967161	T	[C]	{C, T}	0.030303	1	TRUE	FALSE	TRUE	0.0592181	66	0	2	64	C	missense_variant	MODERATE	dod-22	WBGene00010125	transcript	F55G11.5a	protein_coding
IV	12967834	A	[T]	{A, T}	0.0153846	0.984848	TRUE	FALSE	FALSE	0.0305307	65	0	1	64	T	missense_variant	MODERATE	F55G11.2	WBGene00010123	transcript	F55G11.2	protein_coding
IV	12967836	A	[T]	{A, T}	0.0153846	0.984848	TRUE	FALSE	FALSE	0.0305307	65	0	1	64	T	missense_variant	MODERATE	F55G11.2	WBGene00010123	transcript	F55G11.2	protein_coding
IV	12968191	C	[T]	{C, T}	0.0151515	1	TRUE	FALSE	TRUE	0.0300717	66	0	1	65	T	missense_variant	MODERATE	F55G11.2	WBGene00010123	transcript	F55G11.2	protein_coding
IV	12968211	T	[C]	{C, T}	0.166667	1	TRUE	FALSE	TRUE	0.279898	66	0	11	55	C	missense_variant	MODERATE	F55G11.2	WBGene00010123	transcript	F55G11.2	protein_coding
IV	12968217	T	[C]	{C, T}	0.0606061	1	TRUE	FALSE	TRUE	0.114735	66	0	4	62	C	missense_variant	MODERATE	F55G11.2	WBGene00010123	transcript	F55G11.2	protein_coding
IV	12969095	C	[G]	{C, G}	0.0151515	1	TRUE	FALSE	FALSE	0.0300717	66	0	1	65	G	missense_variant	MODERATE	F55G11.2	WBGene00010123	transcript	F55G11.2	protein_coding
IV	12969225	G	[A]	{G, A}	0.0151515	1	TRUE	FALSE	TRUE	0.0300717	66	0	1	65	A	missense_variant	MODERATE	F55G11.2	WBGene00010123	transcript	F55G11.2	protein_coding
IV	12973832	T	[G]	{G, T}	0.0151515	1	TRUE	FALSE	FALSE	0.0300717	66	0	1	65	G	missense_variant	MODERATE	F55G11.4	WBGene00010124	transcript	F55G11.4	protein_coding
IV	12974742	T	[G]	{G, T}	0.030303	1	TRUE	FALSE	FALSE	0.0592181	66	0	2	64	G	missense_variant	MODERATE	F55G11.4	WBGene00010124	transcript	F55G11.4	protein_coding
IV	12974749	C	[T]	{C, T}	0.19697	1	TRUE	FALSE	TRUE	0.31876	66	0	13	53	T	missense_variant	MODERATE	F55G11.4	WBGene00010124	transcript	F55G11.4	protein_coding
IV	12975157	G	[A]	{G, A}	0.0454545	1	TRUE	FALSE	TRUE	0.0874393	66	0	3	63	A	missense_variant	MODERATE	F55G11.4	WBGene00010124	transcript	F55G11.4	protein_coding
IV	12975502	G	[T]	{G, T}	0.0454545	1	TRUE	FALSE	FALSE	0.0874393	66	0	3	63	T	missense_variant	MODERATE	F55G11.4	WBGene00010124	transcript	F55G11.4	protein_coding
IV	12975560	T	[G]	{G, T}	0.151515	1	TRUE	FALSE	FALSE	0.259079	66	0	10	56	G	missense_variant	MODERATE	F55G11.4	WBGene00010124	transcript	F55G11.4	protein_coding
IV	12976326	A	[C]	{C, A}	0.0606061	1	TRUE	FALSE	FALSE	0.114735	66	0	4	62	C	missense_variant	MODERATE	dod-17	WBGene00010745	transcript	K10D11.1	protein_coding
IV	12976987	A	[T]	{A, T}	0.0151515	1	TRUE	FALSE	FALSE	0.0300717	66	0	1	65	T	missense_variant	MODERATE	dod-17	WBGene00010745	transcript	K10D11.1	protein_coding
IV	12977924	C	[T]	{C, T}	0.0151515	1	TRUE	FALSE	TRUE	0.0300717	66	0	1	65	T	missense_variant	MODERATE	dod-17	WBGene00010745	transcript	K10D11.1	protein_coding
IV	12978037	A	[T]	{A, T}	0.257576	1	TRUE	FALSE	FALSE	0.385381	66	0	17	49	T	missense_variant	MODERATE	dod-17	WBGene00010745	transcript	K10D11.1	protein_coding
IV	12981135	C	[G]	{C, G}	0.0151515	1	TRUE	FALSE	FALSE	0.0300717	66	0	1	65	G	missense_variant	MODERATE	K10D11.2	WBGene00010746	transcript	K10D11.2	protein_coding
IV	12981168	G	[T]	{G, T}	0.0151515	1	TRUE	FALSE	FALSE	0.0300717	66	0	1	65	T	missense_variant	MODERATE	K10D11.2	WBGene00010746	transcript	K10D11.2	protein_coding
IV	12981334	T	[C]	{C, T}	0.030303	1	TRUE	FALSE	TRUE	0.0592181	66	0	2	64	C	missense_variant	MODERATE	K10D11.2	WBGene00010746	transcript	K10D11.2	protein_coding
IV	12981723	A	[T]	{A, T}	0.0151515	1	TRUE	FALSE	FALSE	0.0300717	66	0	1	65	T	missense_variant	MODERATE	K10D11.2	WBGene00010746	transcript	K10D11.2	protein_coding
IV	12981745	A	[C]	{C, A}	0.030303	1	TRUE	FALSE	FALSE	0.0592181	66	0	2	64	C	missense_variant	MODERATE	K10D11.2	WBGene00010746	transcript	K10D11.2	protein_coding
IV	12982312	A	[C]	{C, A}	0.121212	1	TRUE	FALSE	FALSE	0.214666	66	0	8	58	C	missense_variant	MODERATE	K10D11.3	WBGene00010747	transcript	K10D11.3c	protein_coding
IV	12982572	G	[C]	{C, G}	0.0151515	1	TRUE	FALSE	FALSE	0.0300717	66	0	1	65	C	missense_variant	MODERATE	K10D11.3	WBGene00010747	transcript	K10D11.3c	protein_coding
IV	12982586	T	[A]	{A, T}	0.0151515	1	TRUE	FALSE	FALSE	0.0300717	66	0	1	65	A	missense_variant	MODERATE	K10D11.3	WBGene00010747	transcript	K10D11.3c	protein_coding
IV	12982707	C	[T]	{C, T}	0.0454545	1	TRUE	FALSE	TRUE	0.0874393	66	0	3	63	T	missense_variant	MODERATE	K10D11.3	WBGene00010747	transcript	K10D11.3c	protein_coding
IV	12982744	T	[C]	{C, T}	0.257576	1	TRUE	FALSE	TRUE	0.385381	66	0	17	49	C	missense_variant	MODERATE	K10D11.3	WBGene00010747	transcript	K10D11.3c	protein_coding
IV	12983235	T	[A]	{A, T}	0.136364	1	TRUE	FALSE	FALSE	0.237335	66	0	9	57	A	missense_variant	MODERATE	K10D11.3	WBGene00010747	transcript	K10D11.3c	protein_coding
IV	12983676	T	[C]	{C, T}	0.0151515	1	TRUE	FALSE	TRUE	0.0300717	66	0	1	65	C	missense_variant&splice_region_variant	MODERATE	K10D11.3	WBGene00010747	transcript	K10D11.3c	protein_coding
IV	12984262	A	[G]	{G, A}	0.0454545	1	TRUE	FALSE	TRUE	0.0874393	66	0	3	63	G	missense_variant	MODERATE	K10D11.3	WBGene00010747	transcript	K10D11.3c	protein_coding
IV	12985094	A	[C, T]	{C, A, T}	0.469697	1	TRUE	FALSE	FALSE	0.501966	66	0	31	35	C	missense_variant	MODERATE	K10D11.3	WBGene00010747	transcript	K10D11.3b	protein_coding
IV	12985112	T	[A]	{A, T}	0.0151515	1	TRUE	FALSE	FALSE	0.0300717	66	0	1	65	A	missense_variant	MODERATE	K10D11.3	WBGene00010747	transcript	K10D11.3b	protein_coding
IV	12985926	T	[A]	{A, T}	0.0151515	1	TRUE	FALSE	FALSE	0.0300717	66	0	1	65	A	missense_variant	MODERATE	K10D11.3	WBGene00010747	transcript	K10D11.3a	protein_coding
IV	12985939	G	[C]	{C, G}	0.0151515	1	TRUE	FALSE	FALSE	0.0300717	66	0	1	65	C	missense_variant	MODERATE	K10D11.3	WBGene00010747	transcript	K10D11.3a	protein_coding
IV	12986045	G	[A]	{G, A}	0.0151515	1	TRUE	FALSE	TRUE	0.0300717	66	0	1	65	A	missense_variant	MODERATE	K10D11.3	WBGene00010747	transcript	K10D11.3a	protein_coding
IV	12986082	A	[G]	{G, A}	0.030303	1	TRUE	FALSE	TRUE	0.0592181	66	0	2	64	G	missense_variant	MODERATE	K10D11.3	WBGene00010747	transcript	K10D11.3a	protein_coding
IV	12986842	T	[C]	{C, T}	0.030303	1	TRUE	FALSE	TRUE	0.0592181	66	0	2	64	C	missense_variant	MODERATE	K10D11.6	WBGene00010750	transcript	K10D11.6	protein_coding
IV	12987329	A	[G]	{G, A}	0.0909091	1	TRUE	FALSE	TRUE	0.166551	66	0	6	60	G	missense_variant	MODERATE	K10D11.6	WBGene00010750	transcript	K10D11.6	protein_coding
IV	12987664	T	[C]	{C, T}	0.257576	1	TRUE	FALSE	TRUE	0.385381	66	0	17	49	C	missense_variant	MODERATE	K10D11.6	WBGene00010750	transcript	K10D11.6	protein_coding
IV	12988994	G	[A]	{G, A}	0.0151515	1	TRUE	FALSE	TRUE	0.0300717	66	0	1	65	A	missense_variant	MODERATE	K10D11.6	WBGene00010750	transcript	K10D11.6	protein_coding
IV	12989029	G	[T]	{G, T}	0.0909091	1	TRUE	FALSE	FALSE	0.166551	66	0	6	60	T	missense_variant	MODERATE	K10D11.6	WBGene00010750	transcript	K10D11.6	protein_coding
IV	12989331	A	[G]	{G, A}	0.0923077	0.984848	TRUE	FALSE	TRUE	0.168873	65	0	6	59	G	missense_variant	MODERATE	K10D11.6	WBGene00010750	transcript	K10D11.6	protein_coding
IV	12989339	T	[A]	{A, T}	0.0153846	0.984848	TRUE	FALSE	FALSE	0.0305307	65	0	1	64	A	missense_variant	MODERATE	K10D11.6	WBGene00010750	transcript	K10D11.6	protein_coding
IV	12989750	A	[C]	{C, A}	0.257576	1	TRUE	FALSE	FALSE	0.385381	66	0	17	49	C	missense_variant	MODERATE	K10D11.5	WBGene00010749	transcript	K10D11.5	protein_coding
IV	12989777	C	[G]	{C, G}	0.0909091	1	TRUE	FALSE	FALSE	0.166551	66	0	6	60	G	missense_variant	MODERATE	K10D11.5	WBGene00010749	transcript	K10D11.5	protein_coding
IV	12990162	C	[T]	{C, T}	0.0151515	1	TRUE	FALSE	TRUE	0.0300717	66	0	1	65	T	missense_variant	MODERATE	K10D11.5	WBGene00010749	transcript	K10D11.5	protein_coding
IV	12990251	C	[A]	{C, A}	0.030303	1	TRUE	FALSE	FALSE	0.0592181	66	0	2	64	A	missense_variant	MODERATE	K10D11.5	WBGene00010749	transcript	K10D11.5	protein_coding
IV	12990281	T	[C]	{C, T}	0.030303	1	TRUE	FALSE	TRUE	0.0592181	66	0	2	64	C	missense_variant	MODERATE	K10D11.5	WBGene00010749	transcript	K10D11.5	protein_coding
IV	12990285	A	[T]	{A, T}	0.0909091	1	TRUE	FALSE	FALSE	0.166551	66	0	6	60	T	missense_variant	MODERATE	K10D11.5	WBGene00010749	transcript	K10D11.5	protein_coding
IV	12990358	C	[T]	{C, T}	0.106061	1	TRUE	FALSE	TRUE	0.191071	66	0	7	59	T	missense_variant	MODERATE	K10D11.5	WBGene00010749	transcript	K10D11.5	protein_coding
IV	12990573	T	[G]	{G, T}	0.0151515	1	TRUE	FALSE	FALSE	0.0300717	66	0	1	65	G	missense_variant	MODERATE	K10D11.5	WBGene00010749	transcript	K10D11.5	protein_coding
IV	12990591	A	[T]	{A, T}	0.0454545	1	TRUE	FALSE	FALSE	0.0874393	66	0	3	63	T	missense_variant	MODERATE	K10D11.5	WBGene00010749	transcript	K10D11.5	protein_coding
IV	12990646	T	[C]	{C, T}	0.106061	1	TRUE	FALSE	TRUE	0.191071	66	0	7	59	C	missense_variant	MODERATE	K10D11.5	WBGene00010749	transcript	K10D11.5	protein_coding
IV	12990702	T	[G]	{G, T}	0.0454545	1	TRUE	FALSE	FALSE	0.0874393	66	0	3	63	G	missense_variant	MODERATE	K10D11.5	WBGene00010749	transcript	K10D11.5	protein_coding
IV	12990703	T	[C]	{C, T}	0.0454545	1	TRUE	FALSE	TRUE	0.0874393	66	0	3	63	C	missense_variant	MODERATE	K10D11.5	WBGene00010749	transcript	K10D11.5	protein_coding
IV	12990777	T	[G]	{G, T}	0.0909091	1	TRUE	FALSE	FALSE	0.166551	66	0	6	60	G	missense_variant	MODERATE	K10D11.5	WBGene00010749	transcript	K10D11.5	protein_coding
IV	12990806	T	[A]	{A, T}	0.0151515	1	TRUE	FALSE	FALSE	0.0300717	66	0	1	65	A	missense_variant	MODERATE	K10D11.5	WBGene00010749	transcript	K10D11.5	protein_coding
IV	12990877	C	[T]	{C, T}	0.0909091	1	TRUE	FALSE	TRUE	0.166551	66	0	6	60	T	missense_variant	MODERATE	K10D11.5	WBGene00010749	transcript	K10D11.5	protein_coding
IV	12991420	C	[A]	{C, A}	0.939394	1	TRUE	FALSE	FALSE	0.114735	66	0	62	4	A	missense_variant	MODERATE	K10D11.5	WBGene00010749	transcript	K10D11.5	protein_coding
IV	12991455	C	[A]	{C, A}	0.030303	1	TRUE	FALSE	FALSE	0.0592181	66	0	2	64	A	missense_variant	MODERATE	K10D11.5	WBGene00010749	transcript	K10D11.5	protein_coding
IV	12991492	A	[T]	{A, T}	0.257576	1	TRUE	FALSE	FALSE	0.385381	66	0	17	49	T	missense_variant	MODERATE	K10D11.5	WBGene00010749	transcript	K10D11.5	protein_coding
IV	12991496	G	[A]	{G, A}	0.0454545	1	TRUE	FALSE	TRUE	0.0874393	66	0	3	63	A	missense_variant	MODERATE	K10D11.5	WBGene00010749	transcript	K10D11.5	protein_coding
IV	12991593	T	[C]	{C, T}	0.257576	1	TRUE	FALSE	TRUE	0.385381	66	0	17	49	C	missense_variant	MODERATE	K10D11.5	WBGene00010749	transcript	K10D11.5	protein_coding
IV	12992204	A	[T]	{A, T}	0.0909091	1	TRUE	FALSE	FALSE	0.166551	66	0	6	60	T	missense_variant	MODERATE	K10D11.4	WBGene00010748	transcript	K10D11.4	protein_coding
IV	12992255	C	[A]	{C, A}	0.0153846	0.984848	TRUE	FALSE	FALSE	0.0305307	65	0	1	64	A	missense_variant	MODERATE	K10D11.4	WBGene00010748	transcript	K10D11.4	protein_coding
IV	12992698	A	[C]	{C, A}	0.0909091	1	TRUE	FALSE	FALSE	0.166551	66	0	6	60	C	missense_variant	MODERATE	K10D11.4	WBGene00010748	transcript	K10D11.4	protein_coding
IV	12992878	A	[T]	{A, T}	0.0909091	1	TRUE	FALSE	FALSE	0.166551	66	0	6	60	T	missense_variant	MODERATE	K10D11.4	WBGene00010748	transcript	K10D11.4	protein_coding
IV	12992920	G	[T]	{G, T}	0.0454545	1	TRUE	FALSE	FALSE	0.0874393	66	0	3	63	T	missense_variant	MODERATE	K10D11.4	WBGene00010748	transcript	K10D11.4	protein_coding
IV	12993022	T	[C]	{C, T}	0.0909091	1	TRUE	FALSE	TRUE	0.166551	66	0	6	60	C	missense_variant	MODERATE	K10D11.4	WBGene00010748	transcript	K10D11.4	protein_coding
IV	12993150	C	[A]	{C, A}	0.09375	0.969697	TRUE	FALSE	FALSE	0.17126	64	0	6	58	A	missense_variant	MODERATE	K10D11.4	WBGene00010748	transcript	K10D11.4	protein_coding
IV	12993299	A	[G]	{G, A}	0.030303	1	TRUE	FALSE	TRUE	0.0592181	66	0	2	64	G	missense_variant	MODERATE	K10D11.4	WBGene00010748	transcript	K10D11.4	protein_coding
IV	12993422	A	[T]	{A, T}	0.0151515	1	TRUE	FALSE	FALSE	0.0300717	66	0	1	65	T	missense_variant	MODERATE	K10D11.4	WBGene00010748	transcript	K10D11.4	protein_coding
IV	12993601	T	[G]	{G, T}	0.0909091	1	TRUE	FALSE	FALSE	0.166551	66	0	6	60	G	missense_variant&splice_region_variant	MODERATE	K10D11.4	WBGene00010748	transcript	K10D11.4	protein_coding
IV	12993875	C	[A]	{C, A}	0.0454545	1	TRUE	FALSE	FALSE	0.0874393	66	0	3	63	A	missense_variant	MODERATE	K10D11.4	WBGene00010748	transcript	K10D11.4	protein_coding
IV	12993910	C	[T]	{C, T}	0.106061	1	TRUE	FALSE	TRUE	0.191071	66	0	7	59	T	missense_variant	MODERATE	K10D11.4	WBGene00010748	transcript	K10D11.4	protein_coding
IV	12993919	A	[T]	{A, T}	0.0909091	1	TRUE	FALSE	FALSE	0.166551	66	0	6	60	T	missense_variant	MODERATE	K10D11.4	WBGene00010748	transcript	K10D11.4	protein_coding
IV	12994414	C	[G]	{C, G}	0.0909091	1	TRUE	FALSE	FALSE	0.166551	66	0	6	60	G	missense_variant	MODERATE	K10D11.4	WBGene00010748	transcript	K10D11.4	protein_coding
IV	12994438	T	[C]	{C, T}	0.0909091	1	TRUE	FALSE	TRUE	0.166551	66	0	6	60	C	missense_variant	MODERATE	K10D11.4	WBGene00010748	transcript	K10D11.4	protein_coding
IV	12994682	A	[ATCT]	{ATCT, A}	0.0909091	1	FALSE	TRUE	FALSE	0.166551	66	0	6	60	ATCT	disruptive_inframe_insertion	MODERATE	K10D11.7	WBGene00045198	transcript	K10D11.7a	protein_coding
IV	12994758	A	[C]	{C, A}	0.0909091	1	TRUE	FALSE	FALSE	0.166551	66	0	6	60	C	missense_variant	MODERATE	K10D11.7	WBGene00045198	transcript	K10D11.7a	protein_coding
IV	12994829	A	[T]	{A, T}	0.106061	1	TRUE	FALSE	FALSE	0.191071	66	0	7	59	T	missense_variant	MODERATE	K10D11.7	WBGene00045198	transcript	K10D11.7a	protein_coding
IV	12994855	T	[G]	{G, T}	0.0909091	1	TRUE	FALSE	FALSE	0.166551	66	0	6	60	G	missense_variant	MODERATE	K10D11.7	WBGene00045198	transcript	K10D11.7a	protein_coding
IV	12994910	A	[C]	{C, A}	0.0151515	1	TRUE	FALSE	FALSE	0.0300717	66	0	1	65	C	missense_variant	MODERATE	K10D11.7	WBGene00045198	transcript	K10D11.7a	protein_coding
IV	12995097	G	[T]	{G, T}	0.0151515	1	TRUE	FALSE	FALSE	0.0300717	66	0	1	65	T	missense_variant	MODERATE	K10D11.7	WBGene00045198	transcript	K10D11.7a	protein_coding
IV	13009189	G	[C]	{C, G}	0.030303	1	TRUE	FALSE	FALSE	0.0592181	66	0	2	64	C	missense_variant	MODERATE	mbk-2	WBGene00003150	transcript	F49E11.1b	protein_coding
IV	13014711	G	[A]	{G, A}	0.0151515	1	TRUE	FALSE	TRUE	0.0300717	66	0	1	65	A	missense_variant	MODERATE	mbk-2	WBGene00003150	transcript	F49E11.1b	protein_coding
IV	13014986	C	[A]	{C, A}	0.0151515	1	TRUE	FALSE	FALSE	0.0300717	66	0	1	65	A	missense_variant	MODERATE	mbk-2	WBGene00003150	transcript	F49E11.1b	protein_coding
IV	13033505	C	[T]	{C, T}	0.0153846	0.984848	TRUE	FALSE	TRUE	0.0305307	65	0	1	64	T	missense_variant	MODERATE	mbk-2	WBGene00003150	transcript	F49E11.1b	protein_coding	p.Leu328Phe	1032/2589	982/1410	328/469		]]
IV	13034501	A	[C]	{C, A}	0.0153846	0.984848	TRUE	FALSE	FALSE	0.0305307	65	0	1	64	C	missense_variant	MODERATE	mbk-2	WBGene00003150	transcript	F49E11.1b	protein_coding
IV	13036263	C	[T]	{C, T}	0.0307692	0.984848	TRUE	FALSE	TRUE	0.0601073	65	0	2	63	T	missense_variant	MODERATE	F49E11.2	WBGene00009889	transcript	F49E11.2.1	protein_coding
IV	13037217	G	[T]	{G, T}	0.0307692	0.984848	TRUE	FALSE	FALSE	0.0601073	65	0	2	63	T	missense_variant	MODERATE	F49E11.2	WBGene00009889	transcript	F49E11.2.1	protein_coding
IV	13038400	A	[T]	{A, T}	0.0461538	0.984848	TRUE	FALSE	FALSE	0.0887299	65	0	3	62	T	missense_variant	MODERATE	F49E11.2	WBGene00009889	transcript	F49E11.2.1	protein_coding
IV	13043174	C	[A]	{C, A}	0.0307692	0.984848	TRUE	FALSE	FALSE	0.0601073	65	0	2	63	A	missense_variant	MODERATE	amt-2	WBGene00000134	transcript	F49E11.3	protein_coding
IV	13043187	A	[T]	{A, T}	0.0153846	0.984848	TRUE	FALSE	FALSE	0.0305307	65	0	1	64	T	missense_variant	MODERATE	amt-2	WBGene00000134	transcript	F49E11.3	protein_coding
IV	13046223	C	[A]	{C, A}	0.0153846	0.984848	TRUE	FALSE	FALSE	0.0305307	65	0	1	64	A	missense_variant	MODERATE	amt-2	WBGene00000134	transcript	F49E11.3	protein_coding
IV	13046755	C	[A]	{C, A}	0.123077	0.984848	TRUE	FALSE	FALSE	0.217531	65	0	8	57	A	missense_variant	MODERATE	amt-2	WBGene00000134	transcript	F49E11.3	protein_coding
IV	13047483	A	[G]	{G, A}	0.2	0.984848	TRUE	FALSE	TRUE	0.322481	65	0	13	52	G	missense_variant	MODERATE	scl-9	WBGene00009890	transcript	F49E11.4	protein_coding
IV	13047516	G	[A]	{G, A}	0.0153846	0.984848	TRUE	FALSE	TRUE	0.0305307	65	0	1	64	A	missense_variant	MODERATE	scl-9	WBGene00009890	transcript	F49E11.4	protein_coding
IV	13048218	G	[A]	{G, A}	0.0461538	0.984848	TRUE	FALSE	TRUE	0.0887299	65	0	3	62	A	missense_variant	MODERATE	scl-9	WBGene00009890	transcript	F49E11.4	protein_coding
IV	13048641	C	[A]	{C, A}	0.0153846	0.984848	TRUE	FALSE	FALSE	0.0305307	65	0	1	64	A	missense_variant	MODERATE	scl-10	WBGene00009891	transcript	F49E11.5	protein_coding
IV	13048789	G	[A]	{G, A}	0.0153846	0.984848	TRUE	FALSE	TRUE	0.0305307	65	0	1	64	A	missense_variant	MODERATE	scl-10	WBGene00009891	transcript	F49E11.5	protein_coding
IV	13048801	G	[A]	{G, A}	0.0153846	0.984848	TRUE	FALSE	TRUE	0.0305307	65	0	1	64	A	missense_variant	MODERATE	scl-10	WBGene00009891	transcript	F49E11.5	protein_coding
IV	13048963	G	[A]	{G, A}	0.0153846	0.984848	TRUE	FALSE	TRUE	0.0305307	65	0	1	64	A	missense_variant	MODERATE	scl-10	WBGene00009891	transcript	F49E11.5	protein_coding
IV	13049744	A	[T]	{A, T}	0.0153846	0.984848	TRUE	FALSE	FALSE	0.0305307	65	0	1	64	T	missense_variant	MODERATE	scl-10	WBGene00009891	transcript	F49E11.5	protein_coding
IV	13049817	T	[A]	{A, T}	0.0461538	0.984848	TRUE	FALSE	FALSE	0.0887299	65	0	3	62	A	missense_variant	MODERATE	scl-10	WBGene00009891	transcript	F49E11.5	protein_coding
IV	13051450	C	[G]	{C, G}	0.0923077	0.984848	TRUE	FALSE	FALSE	0.168873	65	0	6	59	G	missense_variant	MODERATE	scl-11	WBGene00009892	transcript	F49E11.6	protein_coding
IV	13052120	G	[A]	{G, A}	0.0153846	0.984848	TRUE	FALSE	TRUE	0.0305307	65	0	1	64	A	missense_variant	MODERATE	scl-11	WBGene00009892	transcript	F49E11.6	protein_coding
IV	13053533	G	[T]	{G, T}	0.0153846	0.984848	TRUE	FALSE	FALSE	0.0305307	65	0	1	64	T	missense_variant	MODERATE	F49E11.7	WBGene00009893	transcript	F49E11.7	protein_coding
IV	13053556	G	[A]	{G, A}	0.0461538	0.984848	TRUE	FALSE	TRUE	0.0887299	65	0	3	62	A	missense_variant	MODERATE	F49E11.7	WBGene00009893	transcript	F49E11.7	protein_coding
IV	13053587	C	[T]	{C, T}	0.0153846	0.984848	TRUE	FALSE	TRUE	0.0305307	65	0	1	64	T	missense_variant	MODERATE	F49E11.7	WBGene00009893	transcript	F49E11.7	protein_coding
IV	13053626	G	[A]	{G, A}	0.0153846	0.984848	TRUE	FALSE	TRUE	0.0305307	65	0	1	64	A	missense_variant	MODERATE	F49E11.7	WBGene00009893	transcript	F49E11.7	protein_coding
IV	13053854	A	[T]	{A, T}	0.0153846	0.984848	TRUE	FALSE	FALSE	0.0305307	65	0	1	64	T	missense_variant	MODERATE	F49E11.7	WBGene00009893	transcript	F49E11.7	protein_coding
IV	13053917	G	[T]	{G, T}	0.0153846	0.984848	TRUE	FALSE	FALSE	0.0305307	65	0	1	64	T	missense_variant	MODERATE	F49E11.7	WBGene00009893	transcript	F49E11.7	protein_coding
IV	13054701	A	[T]	{A, T}	0.0153846	0.984848	TRUE	FALSE	FALSE	0.0305307	65	0	1	64	T	missense_variant	MODERATE	F49E11.7	WBGene00009893	transcript	F49E11.7	protein_coding
IV	13054805	T	[A]	{A, T}	0.0153846	0.984848	TRUE	FALSE	FALSE	0.0305307	65	0	1	64	A	missense_variant	MODERATE	F49E11.7	WBGene00009893	transcript	F49E11.7	protein_coding
IV	13054807	A	[G]	{G, A}	0.0153846	0.984848	TRUE	FALSE	TRUE	0.0305307	65	0	1	64	G	missense_variant	MODERATE	F49E11.7	WBGene00009893	transcript	F49E11.7	protein_coding
IV	13054982	T	[G]	{G, T}	0.0153846	0.984848	TRUE	FALSE	FALSE	0.0305307	65	0	1	64	G	missense_variant	MODERATE	F49E11.7	WBGene00009893	transcript	F49E11.7	protein_coding
IV	13055030	A	[C]	{C, A}	0.0153846	0.984848	TRUE	FALSE	FALSE	0.0305307	65	0	1	64	C	missense_variant	MODERATE	F49E11.7	WBGene00009893	transcript	F49E11.7	protein_coding
IV	13055128	G	[A]	{G, A}	0.215385	0.984848	TRUE	FALSE	TRUE	0.340608	65	0	14	51	A	missense_variant	MODERATE	F49E11.7	WBGene00009893	transcript	F49E11.7	protein_coding
IV	13056394	T	[A]	{A, T}	0.0153846	0.984848	TRUE	FALSE	FALSE	0.0305307	65	0	1	64	A	missense_variant	MODERATE	scl-1	WBGene00004742	transcript	F49E11.9	protein_coding
IV	13057797	A	[G]	{G, A}	0.0153846	0.984848	TRUE	FALSE	TRUE	0.0305307	65	0	1	64	G	missense_variant	MODERATE	scl-2	WBGene00009895	transcript	F49E11.10a.1	protein_coding
IV	13058045	G	[C]	{C, G}	0.030303	1	TRUE	FALSE	FALSE	0.0592181	66	0	2	64	C	missense_variant	MODERATE	scl-2	WBGene00009895	transcript	F49E11.10a.1	protein_coding
IV	13060522	G	[C]	{C, G}	0.0153846	0.984848	TRUE	FALSE	FALSE	0.0305307	65	0	1	64	C	missense_variant	MODERATE	scl-3	WBGene00009896	transcript	F49E11.11	protein_coding
IV	13064493	G	[T]	{G, T}	0.030303	1	TRUE	FALSE	FALSE	0.0592181	66	0	2	64	T	missense_variant	MODERATE	scl-5	WBGene00008027	transcript	C39E9.2	protein_coding
IV	13064668	G	[A]	{G, A}	0.0454545	1	TRUE	FALSE	TRUE	0.0874393	66	0	3	63	A	missense_variant	MODERATE	scl-5	WBGene00008027	transcript	C39E9.2	protein_coding
IV	13066376	C	[A]	{C, A}	0.030303	1	TRUE	FALSE	FALSE	0.0592181	66	0	2	64	A	missense_variant	MODERATE	col-131	WBGene00000705	transcript	C39E9.3	protein_coding
IV	13068788	T	[C, G]	{C, G, T}	0.166667	1	TRUE	FALSE	FALSE	0.279898	66	0	11	55	G	missense_variant	MODERATE	scl-6	WBGene00008028	transcript	C39E9.4.1	protein_coding
IV	13069466	A	[G]	{G, A}	0.0151515	1	TRUE	FALSE	TRUE	0.0300717	66	0	1	65	G	missense_variant	MODERATE	scl-6	WBGene00008028	transcript	C39E9.4.1	protein_coding
IV	13070491	C	[G, T]	{C, T}	0.030303	1	TRUE	FALSE	FALSE	0.0592181	66	0	2	64	G	missense_variant	MODERATE	scl-7	WBGene00008029	transcript	C39E9.5	protein_coding
IV	13070506	G	[T]	{G, T}	0.030303	1	TRUE	FALSE	FALSE	0.0592181	66	0	2	64	T	missense_variant	MODERATE	scl-7	WBGene00008029	transcript	C39E9.5	protein_coding
IV	13070778	C	[T]	{C, T}	0.0151515	1	TRUE	FALSE	TRUE	0.0300717	66	0	1	65	T	missense_variant	MODERATE	scl-7	WBGene00008029	transcript	C39E9.5	protein_coding
IV	13071839	C	[A]	{C, A}	0.030303	1	TRUE	FALSE	FALSE	0.0592181	66	0	2	64	A	missense_variant	MODERATE	scl-8	WBGene00008030	transcript	C39E9.6	protein_coding
IV	13072237	C	[A]	{C, A}	0.0151515	1	TRUE	FALSE	FALSE	0.0300717	66	0	1	65	A	missense_variant	MODERATE	scl-8	WBGene00008030	transcript	C39E9.6	protein_coding
IV	13072240	G	[A]	{G, A}	0.0151515	1	TRUE	FALSE	TRUE	0.0300717	66	0	1	65	A	missense_variant	MODERATE	scl-8	WBGene00008030	transcript	C39E9.6	protein_coding
IV	13072306	C	[T]	{C, T}	0.0461538	0.984848	TRUE	FALSE	TRUE	0.0887299	65	0	3	62	T	missense_variant	MODERATE	scl-8	WBGene00008030	transcript	C39E9.6	protein_coding
IV	13072416	G	[A]	{G, A}	0.151515	1	TRUE	FALSE	TRUE	0.259079	66	0	10	56	A	missense_variant	MODERATE	scl-8	WBGene00008030	transcript	C39E9.6	protein_coding
IV	13074009	T	[C]	{C, T}	0.0606061	1	TRUE	FALSE	TRUE	0.114735	66	0	4	62	C	missense_variant	MODERATE	C39E9.7	WBGene00008031	transcript	C39E9.7	protein_coding
IV	13074547	C	[T]	{C, T}	0.030303	1	TRUE	FALSE	TRUE	0.0592181	66	0	2	64	T	missense_variant	MODERATE	C39E9.7	WBGene00008031	transcript	C39E9.7	protein_coding
IV	13080795	A	[G]	{G, A}	0.0454545	1	TRUE	FALSE	TRUE	0.0874393	66	0	3	63	G	missense_variant	MODERATE	C39E9.8	WBGene00008032	transcript	C39E9.8a	protein_coding
IV	13080800	G	[T]	{G, T}	0.030303	1	TRUE	FALSE	FALSE	0.0592181	66	0	2	64	T	missense_variant	MODERATE	C39E9.8	WBGene00008032	transcript	C39E9.8a	protein_coding
IV	13082526	A	[G]	{G, A}	0.454545	1	TRUE	FALSE	TRUE	0.499653	66	0	30	36	G	missense_variant	MODERATE	C39E9.8	WBGene00008032	transcript	C39E9.8a	protein_coding
IV	13089456	A	[T]	{A, T}	0.030303	1	TRUE	FALSE	FALSE	0.0592181	66	0	2	64	T	missense_variant	MODERATE	spin-2	WBGene00008033	transcript	C39E9.10	protein_coding
IV	13089683	T	[A]	{A, T}	0.0606061	1	TRUE	FALSE	FALSE	0.114735	66	0	4	62	A	missense_variant	MODERATE	col-132	WBGene00000706	transcript	C39E9.9	protein_coding
IV	13090300	T	[G]	{G, T}	0.0151515	1	TRUE	FALSE	FALSE	0.0300717	66	0	1	65	G	missense_variant	MODERATE	col-132	WBGene00000706	transcript	C39E9.9	protein_coding
IV	13090309	A	[C]	{C, A}	0.212121	1	TRUE	FALSE	FALSE	0.336803	66	0	14	52	C	missense_variant	MODERATE	col-132	WBGene00000706	transcript	C39E9.9	protein_coding
IV	13090315	C	[G]	{C, G}	0.0151515	1	TRUE	FALSE	FALSE	0.0300717	66	0	1	65	G	missense_variant	MODERATE	col-132	WBGene00000706	transcript	C39E9.9	protein_coding
IV	13092117	C	[A]	{C, A}	0.0151515	1	TRUE	FALSE	FALSE	0.0300717	66	0	1	65	A	missense_variant	MODERATE	C39E9.11	WBGene00008034	transcript	C39E9.11	protein_coding
IV	13092315	G	[A]	{G, A}	0.0151515	1	TRUE	FALSE	TRUE	0.0300717	66	0	1	65	A	missense_variant	MODERATE	C39E9.11	WBGene00008034	transcript	C39E9.11	protein_coding
IV	13093337	A	[G]	{G, A}	0.0151515	1	TRUE	FALSE	TRUE	0.0300717	66	0	1	65	G	missense_variant	MODERATE	C39E9.11	WBGene00008034	transcript	C39E9.11	protein_coding
IV	13093365	C	[T]	{C, T}	0.0151515	1	TRUE	FALSE	TRUE	0.0300717	66	0	1	65	T	missense_variant	MODERATE	C39E9.11	WBGene00008034	transcript	C39E9.11	protein_coding
IV	13093549	C	[A]	{C, A}	0.030303	1	TRUE	FALSE	FALSE	0.0592181	66	0	2	64	A	missense_variant	MODERATE	C39E9.11	WBGene00008034	transcript	C39E9.11	protein_coding
IV	13094518	A	[G]	{G, A}	0.0909091	1	TRUE	FALSE	TRUE	0.166551	66	0	6	60	G	missense_variant	MODERATE	C39E9.12	WBGene00008035	transcript	C39E9.12	protein_coding
IV	13094558	C	[A]	{C, A}	0.0151515	1	TRUE	FALSE	FALSE	0.0300717	66	0	1	65	A	missense_variant	MODERATE	C39E9.12	WBGene00008035	transcript	C39E9.12	protein_coding
IV	13096095	A	[G]	{G, A}	0.242424	1	TRUE	FALSE	TRUE	0.370113	66	0	16	50	G	missense_variant	MODERATE	rfc-3	WBGene00004339	transcript	C39E9.13	protein_coding
IV	13096420	A	[G]	{G, A}	0.0454545	1	TRUE	FALSE	TRUE	0.0874393	66	0	3	63	G	missense_variant	MODERATE	rfc-3	WBGene00004339	transcript	C39E9.13	protein_coding
IV	13096429	G	[A]	{G, A}	0.106061	1	TRUE	FALSE	TRUE	0.191071	66	0	7	59	A	missense_variant	MODERATE	rfc-3	WBGene00004339	transcript	C39E9.13	protein_coding
IV	13096552	T	[C]	{C, T}	0.0151515	1	TRUE	FALSE	TRUE	0.0300717	66	0	1	65	C	missense_variant	MODERATE	rfc-3	WBGene00004339	transcript	C39E9.13	protein_coding
IV	13096662	T	[G]	{G, T}	0.0606061	1	TRUE	FALSE	FALSE	0.114735	66	0	4	62	G	missense_variant	MODERATE	rfc-3	WBGene00004339	transcript	C39E9.13	protein_coding
IV	13096799	A	[G]	{G, A}	0.0151515	1	TRUE	FALSE	TRUE	0.0300717	66	0	1	65	G	missense_variant	MODERATE	rfc-3	WBGene00004339	transcript	C39E9.13	protein_coding
IV	13097217	C	[T]	{C, T}	0.0151515	1	TRUE	FALSE	TRUE	0.0300717	66	0	1	65	T	missense_variant	MODERATE	dli-1	WBGene00001007	transcript	C39E9.14a.1	protein_coding
IV	13098112	T	[G]	{G, T}	0.0606061	1	TRUE	FALSE	FALSE	0.114735	66	0	4	62	G	missense_variant	MODERATE	dli-1	WBGene00001007	transcript	C39E9.14a.1	protein_coding
IV	13098718	C	[A]	{C, A}	0.0151515	1	TRUE	FALSE	FALSE	0.0300717	66	0	1	65	A	missense_variant	MODERATE	dli-1	WBGene00001007	transcript	C39E9.14a.1	protein_coding
IV	13100722	A	[C]	{C, A}	0.0151515	1	TRUE	FALSE	FALSE	0.0300717	66	0	1	65	C	missense_variant	MODERATE	B0564.7	WBGene00007207	transcript	B0564.7a	protein_coding
IV	13101458	C	[T]	{C, T}	0.030303	1	TRUE	FALSE	TRUE	0.0592181	66	0	2	64	T	missense_variant	MODERATE	B0564.7	WBGene00007207	transcript	B0564.7a	protein_coding
IV	13101519	C	[A]	{C, A}	0.0151515	1	TRUE	FALSE	FALSE	0.0300717	66	0	1	65	A	missense_variant	MODERATE	B0564.7	WBGene00007207	transcript	B0564.7a	protein_coding
IV	13102337	G	[T]	{G, T}	0.0606061	1	TRUE	FALSE	FALSE	0.114735	66	0	4	62	T	missense_variant	MODERATE	B0564.7	WBGene00007207	transcript	B0564.7a	protein_coding
IV	13102338	A	[G]	{G, A}	0.0151515	1	TRUE	FALSE	TRUE	0.0300717	66	0	1	65	G	missense_variant	MODERATE	B0564.7	WBGene00007207	transcript	B0564.7a	protein_coding
IV	13102869	C	[G]	{C, G}	0.0151515	1	TRUE	FALSE	FALSE	0.0300717	66	0	1	65	G	missense_variant	MODERATE	B0564.7	WBGene00007207	transcript	B0564.7a	protein_coding
IV	13102870	G	[A]	{G, A}	0.212121	1	TRUE	FALSE	TRUE	0.336803	66	0	14	52	A	missense_variant	MODERATE	B0564.7	WBGene00007207	transcript	B0564.7a	protein_coding
IV	13104503	T	[A]	{A, T}	0.0606061	1	TRUE	FALSE	FALSE	0.114735	66	0	4	62	A	missense_variant	MODERATE	B0564.7	WBGene00007207	transcript	B0564.7a	protein_coding
IV	13104504	A	[G]	{G, A}	0.0454545	1	TRUE	FALSE	TRUE	0.0874393	66	0	3	63	G	missense_variant	MODERATE	B0564.7	WBGene00007207	transcript	B0564.7a	protein_coding
IV	13105594	G	[A]	{G, A}	0.0151515	1	TRUE	FALSE	TRUE	0.0300717	66	0	1	65	A	missense_variant	MODERATE	rde-11	WBGene00023421	transcript	B0564.11.1	protein_coding
IV	13106010	A	[G]	{G, A}	0.0454545	1	TRUE	FALSE	TRUE	0.0874393	66	0	3	63	G	missense_variant	MODERATE	rde-11	WBGene00023421	transcript	B0564.11.1	protein_coding
IV	13106020	T	[A]	{A, T}	0.0909091	1	TRUE	FALSE	FALSE	0.166551	66	0	6	60	A	missense_variant	MODERATE	rde-11	WBGene00023421	transcript	B0564.11.1	protein_coding
IV	13106540	C	[G]	{C, G}	0.0151515	1	TRUE	FALSE	FALSE	0.0300717	66	0	1	65	G	missense_variant	MODERATE	rde-11	WBGene00023421	transcript	B0564.11.1	protein_coding
IV	13108599	T	[C]	{C, T}	0.0151515	1	TRUE	FALSE	TRUE	0.0300717	66	0	1	65	C	missense_variant	MODERATE	best-1	WBGene00007203	transcript	B0564.3.1	protein_coding
IV	13109018	C	[T]	{C, T}	0.030303	1	TRUE	FALSE	TRUE	0.0592181	66	0	2	64	T	missense_variant	MODERATE	best-1	WBGene00007203	transcript	B0564.3.1	protein_coding
IV	13109172	T	[C]	{C, T}	0.0454545	1	TRUE	FALSE	TRUE	0.0874393	66	0	3	63	C	missense_variant	MODERATE	best-1	WBGene00007203	transcript	B0564.3.1	protein_coding
IV	13111290	G	[A]	{G, A}	0.030303	1	TRUE	FALSE	TRUE	0.0592181	66	0	2	64	A	missense_variant	MODERATE	B0564.2	WBGene00007202	transcript	B0564.2a	protein_coding
IV	13111314	A	[G]	{G, A}	0.0151515	1	TRUE	FALSE	TRUE	0.0300717	66	0	1	65	G	missense_variant	MODERATE	B0564.2	WBGene00007202	transcript	B0564.2a	protein_coding
IV	13111355	G	[C]	{C, G}	0.030303	1	TRUE	FALSE	FALSE	0.0592181	66	0	2	64	C	missense_variant	MODERATE	B0564.2	WBGene00007202	transcript	B0564.2a	protein_coding
IV	13112345	C	[T]	{C, T}	0.030303	1	TRUE	FALSE	TRUE	0.0592181	66	0	2	64	T	missense_variant	MODERATE	best-2	WBGene00007204	transcript	B0564.4	protein_coding
IV	13119229	G	[A]	{G, A}	0.0151515	1	TRUE	FALSE	TRUE	0.0300717	66	0	1	65	A	missense_variant	MODERATE	unc-30	WBGene00006766	transcript	B0564.10b	protein_coding
IV	13150711	T	[A]	{A, T}	0.0151515	1	TRUE	FALSE	FALSE	0.0300717	66	0	1	65	A	missense_variant	MODERATE	F09E8.2	WBGene00008624	transcript	F09E8.2b	protein_coding
IV	13152024	T	[A]	{A, T}	0.0454545	1	TRUE	FALSE	FALSE	0.0874393	66	0	3	63	A	missense_variant	MODERATE	F09E8.2	WBGene00008624	transcript	F09E8.2a	protein_coding
IV	13152622	C	[CCTT]	{C, CCTT}	0.19697	1	FALSE	TRUE	FALSE	0.31876	66	0	13	53	CCTT	conservative_inframe_insertion	MODERATE	F09E8.2	WBGene00008624	transcript	F09E8.2a	protein_coding
IV	13152792	A	[T]	{A, T}	0.212121	1	TRUE	FALSE	FALSE	0.336803	66	0	14	52	T	missense_variant	MODERATE	F09E8.2	WBGene00008624	transcript	F09E8.2a	protein_coding
IV	13153772	T	[A]	{A, T}	0.19697	1	TRUE	FALSE	FALSE	0.31876	66	0	13	53	A	missense_variant	MODERATE	F09E8.2	WBGene00008624	transcript	F09E8.2a	protein_coding
IV	13154254	T	[C]	{C, T}	0.0151515	1	TRUE	FALSE	TRUE	0.0300717	66	0	1	65	C	missense_variant	MODERATE	F09E8.2	WBGene00008624	transcript	F09E8.2a	protein_coding
IV	13154268	G	[A]	{G, A}	0.030303	1	TRUE	FALSE	TRUE	0.0592181	66	0	2	64	A	missense_variant	MODERATE	F09E8.2	WBGene00008624	transcript	F09E8.2a	protein_coding
IV	13155282	G	[A]	{G, A}	0.0454545	1	TRUE	FALSE	TRUE	0.0874393	66	0	3	63	A	missense_variant	MODERATE	msh-5	WBGene00003421	transcript	F09E8.3a	protein_coding
IV	13155297	G	[A]	{G, A}	0.0151515	1	TRUE	FALSE	TRUE	0.0300717	66	0	1	65	A	missense_variant	MODERATE	msh-5	WBGene00003421	transcript	F09E8.3a	protein_coding
IV	13155312	C	[A]	{C, A}	0.0454545	1	TRUE	FALSE	FALSE	0.0874393	66	0	3	63	A	missense_variant	MODERATE	msh-5	WBGene00003421	transcript	F09E8.3a	protein_coding
IV	13155721	C	[T]	{C, T}	0.106061	1	TRUE	FALSE	TRUE	0.191071	66	0	7	59	T	missense_variant	MODERATE	msh-5	WBGene00003421	transcript	F09E8.3a	protein_coding
IV	13155816	A	[T]	{A, T}	0.0151515	1	TRUE	FALSE	FALSE	0.0300717	66	0	1	65	T	missense_variant	MODERATE	msh-5	WBGene00003421	transcript	F09E8.3a	protein_coding
IV	13155913	A	[G]	{G, A}	0.0151515	1	TRUE	FALSE	TRUE	0.0300717	66	0	1	65	G	missense_variant	MODERATE	msh-5	WBGene00003421	transcript	F09E8.3a	protein_coding
IV	13155972	T	[C]	{C, T}	0.0151515	1	TRUE	FALSE	TRUE	0.0300717	66	0	1	65	C	missense_variant	MODERATE	msh-5	WBGene00003421	transcript	F09E8.3a	protein_coding
IV	13156223	C	[A]	{C, A}	0.0151515	1	TRUE	FALSE	FALSE	0.0300717	66	0	1	65	A	missense_variant	MODERATE	msh-5	WBGene00003421	transcript	F09E8.3a	protein_coding
IV	13156240	G	[T]	{G, T}	0.257576	1	TRUE	FALSE	FALSE	0.385381	66	0	17	49	T	missense_variant	MODERATE	msh-5	WBGene00003421	transcript	F09E8.3a	protein_coding
IV	13156292	A	[T]	{A, T}	0.0606061	1	TRUE	FALSE	FALSE	0.114735	66	0	4	62	T	missense_variant	MODERATE	msh-5	WBGene00003421	transcript	F09E8.3a	protein_coding
IV	13159026	G	[A]	{G, A}	0.0153846	0.984848	TRUE	FALSE	TRUE	0.0305307	65	0	1	64	A	missense_variant	MODERATE	msh-5	WBGene00003421	transcript	F09E8.3a	protein_coding
IV	13159290	T	[C]	{C, T}	0.0307692	0.984848	TRUE	FALSE	TRUE	0.0601073	65	0	2	63	C	missense_variant	MODERATE	msh-5	WBGene00003421	transcript	F09E8.3a	protein_coding
IV	13159527	C	[G]	{C, G}	0.0757576	1	TRUE	FALSE	FALSE	0.141106	66	0	5	61	G	missense_variant	MODERATE	msh-5	WBGene00003421	transcript	F09E8.3a	protein_coding
IV	13159680	A	[T]	{A, T}	0.0606061	1	TRUE	FALSE	FALSE	0.114735	66	0	4	62	T	missense_variant	MODERATE	msh-5	WBGene00003421	transcript	F09E8.3a	protein_coding
IV	13159695	G	[A]	{G, A}	0.0151515	1	TRUE	FALSE	TRUE	0.0300717	66	0	1	65	A	missense_variant	MODERATE	msh-5	WBGene00003421	transcript	F09E8.3a	protein_coding
IV	13160486	G	[A]	{G, A}	0.0151515	1	TRUE	FALSE	TRUE	0.0300717	66	0	1	65	A	missense_variant	MODERATE	msh-5	WBGene00003421	transcript	F09E8.3a	protein_coding
IV	13160521	G	[A]	{G, A}	0.0151515	1	TRUE	FALSE	TRUE	0.0300717	66	0	1	65	A	missense_variant	MODERATE	msh-5	WBGene00003421	transcript	F09E8.3a	protein_coding
IV	13160727	G	[A]	{G, A}	0.212121	1	TRUE	FALSE	TRUE	0.336803	66	0	14	52	A	missense_variant	MODERATE	msh-5	WBGene00003421	transcript	F09E8.3a	protein_coding
IV	13160766	A	[G]	{G, A}	0.0757576	1	TRUE	FALSE	TRUE	0.141106	66	0	5	61	G	missense_variant	MODERATE	msh-5	WBGene00003421	transcript	F09E8.3a	protein_coding
IV	13161722	G	[A]	{G, A}	0.0606061	1	TRUE	FALSE	TRUE	0.114735	66	0	4	62	A	missense_variant	MODERATE	msh-5	WBGene00003421	transcript	F09E8.3a	protein_coding
IV	13161827	G	[A]	{G, A}	0.121212	1	TRUE	FALSE	TRUE	0.214666	66	0	8	58	A	missense_variant	MODERATE	msh-5	WBGene00003421	transcript	F09E8.3a	protein_coding
IV	13161862	C	[CAGG]	{C, CAGG}	0.0909091	1	FALSE	TRUE	FALSE	0.166551	66	0	6	60	CAGG	disruptive_inframe_insertion	MODERATE	msh-5	WBGene00003421	transcript	F09E8.3a	protein_coding
IV	13161863	A	[AGGC]	{AGGC, A}	0.0151515	1	FALSE	TRUE	FALSE	0.0300717	66	0	1	65	AGGC	disruptive_inframe_insertion	MODERATE	msh-5	WBGene00003421	transcript	F09E8.3a	protein_coding
IV	13161934	T	[C]	{C, T}	0.212121	1	TRUE	FALSE	TRUE	0.336803	66	0	14	52	C	missense_variant	MODERATE	msh-5	WBGene00003421	transcript	F09E8.3a	protein_coding
IV	13162879	C	[A]	{C, A}	0.0151515	1	TRUE	FALSE	FALSE	0.0300717	66	0	1	65	A	missense_variant	MODERATE	msh-5	WBGene00003421	transcript	F09E8.3a	protein_coding
IV	13163066	C	[T]	{C, T}	0.0757576	1	TRUE	FALSE	TRUE	0.141106	66	0	5	61	T	missense_variant	MODERATE	msh-5	WBGene00003421	transcript	F09E8.3a	protein_coding
IV	13163085	C	[T]	{C, T}	0.0151515	1	TRUE	FALSE	TRUE	0.0300717	66	0	1	65	T	missense_variant	MODERATE	msh-5	WBGene00003421	transcript	F09E8.3a	protein_coding
IV	13163734	G	[A]	{G, A}	0.0757576	1	TRUE	FALSE	TRUE	0.141106	66	0	5	61	A	missense_variant	MODERATE	msh-5	WBGene00003421	transcript	F09E8.3a	protein_coding
IV	13163803	A	[G]	{G, A}	0.0606061	1	TRUE	FALSE	TRUE	0.114735	66	0	4	62	G	missense_variant	MODERATE	msh-5	WBGene00003421	transcript	F09E8.3a	protein_coding
IV	13163846	T	[G]	{G, T}	0.0151515	1	TRUE	FALSE	FALSE	0.0300717	66	0	1	65	G	missense_variant	MODERATE	msh-5	WBGene00003421	transcript	F09E8.3a	protein_coding
IV	13163898	C	[A]	{C, A}	0.212121	1	TRUE	FALSE	FALSE	0.336803	66	0	14	52	A	missense_variant	MODERATE	msh-5	WBGene00003421	transcript	F09E8.3a	protein_coding
IV	13165549	T	[C]	{C, T}	0.0151515	1	TRUE	FALSE	TRUE	0.0300717	66	0	1	65	C	missense_variant	MODERATE	scl-14	WBGene00008625	transcript	F09E8.5	protein_coding
IV	13166399	G	[T]	{G, T}	0.03125	0.969697	TRUE	FALSE	FALSE	0.0610236	64	0	2	62	T	missense_variant	MODERATE	scl-14	WBGene00008625	transcript	F09E8.5	protein_coding
IV	13166442	G	[A]	{G, A}	0.03125	0.969697	TRUE	FALSE	TRUE	0.0610236	64	0	2	62	A	missense_variant	MODERATE	scl-14	WBGene00008625	transcript	F09E8.5	protein_coding
IV	13170648	G	[C]	{C, G}	0.0153846	0.984848	TRUE	FALSE	FALSE	0.0305307	65	0	1	64	C	missense_variant	MODERATE	nas-14	WBGene00003533	transcript	F09E8.6	protein_coding
IV	13170805	C	[T]	{C, T}	0.0153846	0.984848	TRUE	FALSE	TRUE	0.0305307	65	0	1	64	T	missense_variant	MODERATE	nas-14	WBGene00003533	transcript	F09E8.6	protein_coding
IV	13170933	C	[T]	{C, T}	0.0615385	0.984848	TRUE	FALSE	TRUE	0.116398	65	0	4	61	T	missense_variant	MODERATE	nas-14	WBGene00003533	transcript	F09E8.6	protein_coding
IV	13172512	C	[T]	{C, T}	0.0307692	0.984848	TRUE	FALSE	TRUE	0.0601073	65	0	2	63	T	missense_variant	MODERATE	nas-14	WBGene00003533	transcript	F09E8.6	protein_coding
IV	13173449	A	[T]	{A, T}	0.0153846	0.984848	TRUE	FALSE	FALSE	0.0305307	65	0	1	64	T	missense_variant	MODERATE	nas-14	WBGene00003533	transcript	F09E8.6	protein_coding
IV	13173488	G	[GAGAACA]	{G, GAGAACA}	0.0153846	0.984848	FALSE	TRUE	FALSE	0.0305307	65	0	1	64	GAGAACA	conservative_inframe_insertion	MODERATE	nas-14	WBGene00003533	transcript	F09E8.6	protein_coding
IV	13173489	A	[AGAACAC]	{A, AGAACAC}	0.0153846	0.984848	FALSE	TRUE	FALSE	0.0305307	65	0	1	64	AGAACAC	disruptive_inframe_insertion	MODERATE	nas-14	WBGene00003533	transcript	F09E8.6	protein_coding
IV	13173495	A	[AGAACAC]	{A, AGAACAC}	0.0153846	0.984848	FALSE	TRUE	FALSE	0.0305307	65	0	1	64	AGAACAC	conservative_inframe_insertion	MODERATE	nas-14	WBGene00003533	transcript	F09E8.6	protein_coding
IV	13173528	C	[T]	{C, T}	0.0153846	0.984848	TRUE	FALSE	TRUE	0.0305307	65	0	1	64	T	missense_variant	MODERATE	nas-14	WBGene00003533	transcript	F09E8.6	protein_coding
IV	13176555	T	[C]	{C, T}	0.0153846	0.984848	TRUE	FALSE	TRUE	0.0305307	65	0	1	64	C	missense_variant	MODERATE	lev-1	WBGene00002974	transcript	F09E8.7a	protein_coding
IV	13177756	A	[C]	{C, A}	0.230769	0.984848	TRUE	FALSE	FALSE	0.357782	65	0	15	50	C	missense_variant	MODERATE	lev-1	WBGene00002974	transcript	F09E8.7a	protein_coding
IV	13180232	C	[T]	{C, T}	0.123077	0.984848	TRUE	FALSE	TRUE	0.217531	65	0	8	57	T	missense_variant	MODERATE	F58D2.3	WBGene00044978	transcript	F58D2.3	protein_coding
IV	13180233	A	[T]	{A, T}	0.123077	0.984848	TRUE	FALSE	FALSE	0.217531	65	0	8	57	T	missense_variant	MODERATE	F58D2.3	WBGene00044978	transcript	F58D2.3	protein_coding
IV	13180246	G	[A]	{G, A}	0.184615	0.984848	TRUE	FALSE	TRUE	0.303399	65	0	12	53	A	missense_variant	MODERATE	F58D2.3	WBGene00044978	transcript	F58D2.3	protein_coding
IV	13180380	A	[T]	{A, T}	0.09375	0.969697	TRUE	FALSE	FALSE	0.17126	64	0	6	58	T	missense_variant	MODERATE	F58D2.3	WBGene00044978	transcript	F58D2.3	protein_coding
IV	13180387	A	[C]	{C, A}	0.0151515	1	TRUE	FALSE	FALSE	0.0300717	66	0	1	65	C	missense_variant	MODERATE	F58D2.3	WBGene00044978	transcript	F58D2.3	protein_coding
IV	13180462	T	[C]	{C, T}	0.0153846	0.984848	TRUE	FALSE	TRUE	0.0305307	65	0	1	64	C	missense_variant	MODERATE	F58D2.3	WBGene00044978	transcript	F58D2.3	protein_coding
IV	13180467	A	[C]	{C, A}	0.0153846	0.984848	TRUE	FALSE	FALSE	0.0305307	65	0	1	64	C	missense_variant	MODERATE	F58D2.3	WBGene00044978	transcript	F58D2.3	protein_coding
IV	13180663	T	[C]	{C, T}	0.19697	1	TRUE	FALSE	TRUE	0.31876	66	0	13	53	C	missense_variant	MODERATE	F58D2.3	WBGene00044978	transcript	F58D2.3	protein_coding
IV	13188451	AGTT	[A]	{AGTT, A}	0.0606061	1	FALSE	TRUE	FALSE	0.114735	66	0	4	62	A	conservative_inframe_deletion	MODERATE	F58D2.4	WBGene00185077	transcript	F58D2.4	protein_coding
IV	13188929	A	[G]	{G, A}	0.0151515	1	TRUE	FALSE	TRUE	0.0300717	66	0	1	65	G	missense_variant	MODERATE	F58D2.4	WBGene00185077	transcript	F58D2.4	protein_coding
IV	13189275	T	[A]	{A, T}	0.0151515	1	TRUE	FALSE	FALSE	0.0300717	66	0	1	65	A	missense_variant	MODERATE	F58D2.5	WBGene00206469	transcript	F58D2.5	protein_coding
IV	13189276	C	[T]	{C, T}	0.0151515	1	TRUE	FALSE	TRUE	0.0300717	66	0	1	65	T	missense_variant	MODERATE	F58D2.5	WBGene00206469	transcript	F58D2.5	protein_coding
IV	13189429	C	[A]	{C, A}	0.0151515	1	TRUE	FALSE	FALSE	0.0300717	66	0	1	65	A	missense_variant	MODERATE	F58D2.5	WBGene00206469	transcript	F58D2.5	protein_coding
IV	13190235	C	[T]	{C, T}	0.0151515	1	TRUE	FALSE	TRUE	0.0300717	66	0	1	65	T	missense_variant	MODERATE	F58D2.2	WBGene00010241	transcript	F58D2.2	protein_coding
IV	13190688	C	[T]	{C, T}	0.136364	1	TRUE	FALSE	TRUE	0.237335	66	0	9	57	T	missense_variant	MODERATE	F58D2.2	WBGene00010241	transcript	F58D2.2	protein_coding
IV	13191332	G	[T]	{G, T}	0.0151515	1	TRUE	FALSE	FALSE	0.0300717	66	0	1	65	T	missense_variant	MODERATE	F58D2.2	WBGene00010241	transcript	F58D2.2	protein_coding
IV	13191412	C	[T]	{C, T}	0.0151515	1	TRUE	FALSE	TRUE	0.0300717	66	0	1	65	T	missense_variant	MODERATE	F58D2.2	WBGene00010241	transcript	F58D2.2	protein_coding
IV	13192234	AAACTACTGG	[A]	{AAACTACTGG, A}	0.0454545	1	FALSE	TRUE	FALSE	0.0874393	66	0	3	63	A	conservative_inframe_deletion	MODERATE	F58D2.2	WBGene00010241	transcript	F58D2.2	protein_coding
IV	13193821	C	[T]	{C, T}	0.0322581	0.939394	TRUE	FALSE	TRUE	0.0629426	62	0	2	60	T	missense_variant	MODERATE	C48D1.1	WBGene00008177	transcript	C48D1.1a	protein_coding
IV	13193957	C	[G]	{C, G}	0.0163934	0.924242	TRUE	FALSE	FALSE	0.0325159	61	0	1	60	G	missense_variant	MODERATE	C48D1.1	WBGene00008177	transcript	C48D1.1a	protein_coding
IV	13194319	T	[C]	{C, T}	0.0327869	0.924242	TRUE	FALSE	TRUE	0.063948	61	0	2	59	C	missense_variant	MODERATE	C48D1.1	WBGene00008177	transcript	C48D1.1a	protein_coding
IV	13194587	T	[G]	{G, T}	0.015625	0.969697	TRUE	FALSE	FALSE	0.0310039	64	0	1	63	G	missense_variant	MODERATE	C48D1.1	WBGene00008177	transcript	C48D1.1a	protein_coding
IV	13194622	C	[T]	{C, T}	0.015625	0.969697	TRUE	FALSE	TRUE	0.0310039	64	0	1	63	T	missense_variant	MODERATE	C48D1.1	WBGene00008177	transcript	C48D1.1a	protein_coding
IV	13194626	G	[C]	{C, G}	0.015625	0.969697	TRUE	FALSE	FALSE	0.0310039	64	0	1	63	C	missense_variant	MODERATE	C48D1.1	WBGene00008177	transcript	C48D1.1a	protein_coding
IV	13194744	C	[A]	{C, A}	0.0625	0.969697	TRUE	FALSE	FALSE	0.11811	64	0	4	60	A	missense_variant	MODERATE	C48D1.1	WBGene00008177	transcript	C48D1.1a	protein_coding
IV	13194836	T	[C]	{C, T}	0.015625	0.969697	TRUE	FALSE	TRUE	0.0310039	64	0	1	63	C	missense_variant	MODERATE	C48D1.1	WBGene00008177	transcript	C48D1.1a	protein_coding
IV	13195304	G	[T]	{G, T}	0.0625	0.969697	TRUE	FALSE	FALSE	0.11811	64	0	4	60	T	missense_variant	MODERATE	C48D1.1	WBGene00008177	transcript	C48D1.1a	protein_coding
IV	13195435	T	[A]	{A, T}	0.015625	0.969697	TRUE	FALSE	FALSE	0.0310039	64	0	1	63	A	missense_variant	MODERATE	C48D1.1	WBGene00008177	transcript	C48D1.1a	protein_coding
IV	13195600	G	[C]	{C, G}	0.046875	0.969697	TRUE	FALSE	FALSE	0.0900591	64	0	3	61	C	missense_variant	MODERATE	C48D1.1	WBGene00008177	transcript	C48D1.1a	protein_coding
IV	13195970	T	[A]	{A, T}	0.0625	0.969697	TRUE	FALSE	FALSE	0.11811	64	0	4	60	A	missense_variant	MODERATE	C48D1.1	WBGene00008177	transcript	C48D1.1a	protein_coding
IV	13196653	T	[A]	{A, T}	0.0153846	0.984848	TRUE	FALSE	FALSE	0.0305307	65	0	1	64	A	missense_variant	MODERATE	C48D1.1	WBGene00008177	transcript	C48D1.1a	protein_coding
IV	13197106	A	[T]	{A, T}	0.03125	0.969697	TRUE	FALSE	FALSE	0.0610236	64	0	2	62	T	missense_variant	MODERATE	C48D1.1	WBGene00008177	transcript	C48D1.1a	protein_coding
IV	13197236	A	[C]	{C, A}	0.015625	0.969697	TRUE	FALSE	FALSE	0.0310039	64	0	1	63	C	missense_variant	MODERATE	C48D1.1	WBGene00008177	transcript	C48D1.1a	protein_coding
IV	13203367	G	[A]	{G, A}	0.0163934	0.924242	TRUE	FALSE	TRUE	0.0325159	61	0	1	60	A	missense_variant	MODERATE	ced-3	WBGene00000417	transcript	C48D1.2a	protein_coding
IV	13208222	A	[T]	{A, T}	0.30303	1	TRUE	FALSE	FALSE	0.42563	66	0	20	46	T	missense_variant	MODERATE	C48D1.9	WBGene00194643	transcript	C48D1.9a	protein_coding
IV	13208772	C	[T]	{C, T}	0.0151515	1	TRUE	FALSE	TRUE	0.0300717	66	0	1	65	T	missense_variant	MODERATE	C48D1.9	WBGene00194643	transcript	C48D1.9a	protein_coding
IV	13208777	T	[C]	{C, T}	0.0757576	1	TRUE	FALSE	TRUE	0.141106	66	0	5	61	C	missense_variant	MODERATE	C48D1.9	WBGene00194643	transcript	C48D1.9a	protein_coding
IV	13208975	C	[A]	{C, A}	0.0606061	1	TRUE	FALSE	FALSE	0.114735	66	0	4	62	A	missense_variant	MODERATE	C48D1.9	WBGene00194643	transcript	C48D1.9a	protein_coding
IV	13209194	C	[T]	{C, T}	0.0757576	1	TRUE	FALSE	TRUE	0.141106	66	0	5	61	T	missense_variant	MODERATE	C48D1.9	WBGene00194643	transcript	C48D1.9a	protein_coding
IV	13209322	A	[G]	{G, A}	0.136364	1	TRUE	FALSE	TRUE	0.237335	66	0	9	57	G	missense_variant	MODERATE	C48D1.9	WBGene00194643	transcript	C48D1.9a	protein_coding
IV	13209332	C	[T]	{C, T}	0.212121	1	TRUE	FALSE	TRUE	0.336803	66	0	14	52	T	missense_variant	MODERATE	C48D1.9	WBGene00194643	transcript	C48D1.9a	protein_coding
IV	13209344	T	[A]	{A, T}	0.030303	1	TRUE	FALSE	FALSE	0.0592181	66	0	2	64	A	missense_variant	MODERATE	C48D1.9	WBGene00194643	transcript	C48D1.9a	protein_coding
IV	13214548	T	[G]	{G, T}	0.212121	1	TRUE	FALSE	FALSE	0.336803	66	0	14	52	G	missense_variant	MODERATE	cho-1	WBGene00000501	transcript	C48D1.3	protein_coding
IV	13222008	T	[C]	{C, T}	0.030303	1	TRUE	FALSE	TRUE	0.0592181	66	0	2	64	C	missense_variant	MODERATE	C48D1.5	WBGene00008178	transcript	C48D1.5c	protein_coding
IV	13222462	G	[A]	{G, A}	0.0151515	1	TRUE	FALSE	TRUE	0.0300717	66	0	1	65	A	missense_variant	MODERATE	C48D1.5	WBGene00008178	transcript	C48D1.5c	protein_coding
IV	13222803	A	[T]	{A, T}	0.030303	1	TRUE	FALSE	FALSE	0.0592181	66	0	2	64	T	missense_variant	MODERATE	C48D1.5	WBGene00008178	transcript	C48D1.5c	protein_coding
IV	13228359	G	[A]	{G, A}	0.0151515	1	TRUE	FALSE	TRUE	0.0300717	66	0	1	65	A	missense_variant	MODERATE	C48D1.5	WBGene00008178	transcript	C48D1.5c	protein_coding
IV	13232822	C	[G]	{C, G}	0.0606061	1	TRUE	FALSE	FALSE	0.114735	66	0	4	62	G	missense_variant	MODERATE	C48D1.5	WBGene00008178	transcript	C48D1.5c	protein_coding
IV	13234697	G	[A]	{G, A}	0.0151515	1	TRUE	FALSE	TRUE	0.0300717	66	0	1	65	A	missense_variant	MODERATE	JC8.2	WBGene00010435	transcript	JC8.2.1	protein_coding
IV	13234859	C	[T]	{C, T}	0.0151515	1	TRUE	FALSE	TRUE	0.0300717	66	0	1	65	T	missense_variant	MODERATE	JC8.2	WBGene00010435	transcript	JC8.2.1	protein_coding
IV	13237748	G	[T]	{G, T}	0.0454545	1	TRUE	FALSE	FALSE	0.0874393	66	0	3	63	T	missense_variant	MODERATE	tag-115	WBGene00006466	transcript	JC8.13a.1	protein_coding
IV	13238627	T	[A]	{A, T}	0.030303	1	TRUE	FALSE	FALSE	0.0592181	66	0	2	64	A	missense_variant	MODERATE	tag-115	WBGene00006466	transcript	JC8.13a.1	protein_coding
IV	13238666	C	[T]	{C, T}	0.0151515	1	TRUE	FALSE	TRUE	0.0300717	66	0	1	65	T	missense_variant	MODERATE	tag-115	WBGene00006466	transcript	JC8.13a.1	protein_coding
IV	13239153	T	[C]	{C, T}	0.318182	1	TRUE	FALSE	TRUE	0.437196	66	0	21	45	C	missense_variant&splice_region_variant	MODERATE	tag-115	WBGene00006466	transcript	JC8.13a.1	protein_coding
IV	13239343	G	[T]	{G, T}	0.0606061	1	TRUE	FALSE	FALSE	0.114735	66	0	4	62	T	missense_variant	MODERATE	tag-115	WBGene00006466	transcript	JC8.13a.1	protein_coding
IV	13241473	T	[C]	{C, T}	0.151515	1	TRUE	FALSE	TRUE	0.259079	66	0	10	56	C	missense_variant	MODERATE	lin-54	WBGene00003037	transcript	JC8.6a	protein_coding
IV	13242746	G	[A]	{G, A}	0.0151515	1	TRUE	FALSE	TRUE	0.0300717	66	0	1	65	A	missense_variant	MODERATE	lin-54	WBGene00003037	transcript	JC8.6a	protein_coding
IV	13242789	A	[T]	{A, T}	0.0757576	1	TRUE	FALSE	FALSE	0.141106	66	0	5	61	T	missense_variant	MODERATE	lin-54	WBGene00003037	transcript	JC8.6a	protein_coding
IV	13244092	A	[G]	{G, A}	0.0151515	1	TRUE	FALSE	TRUE	0.0300717	66	0	1	65	G	missense_variant	MODERATE	JC8.4	WBGene00010436	transcript	JC8.4	protein_coding
IV	13244117	T	[C]	{C, T}	0.0151515	1	TRUE	FALSE	TRUE	0.0300717	66	0	1	65	C	missense_variant	MODERATE	JC8.4	WBGene00010436	transcript	JC8.4	protein_coding
IV	13246987	G	[A]	{G, A}	0.030303	1	TRUE	FALSE	TRUE	0.0592181	66	0	2	64	A	missense_variant	MODERATE	cox-11	WBGene00010437	transcript	JC8.5a	protein_coding
IV	13247333	G	[A]	{G, A}	0.0151515	1	TRUE	FALSE	TRUE	0.0300717	66	0	1	65	A	missense_variant	MODERATE	JC8.7	WBGene00010439	transcript	JC8.7a	protein_coding
IV	13247351	A	[G]	{G, A}	0.0606061	1	TRUE	FALSE	TRUE	0.114735	66	0	4	62	G	missense_variant	MODERATE	JC8.7	WBGene00010439	transcript	JC8.7a	protein_coding
IV	13251048	T	[G]	{G, T}	0.0151515	1	TRUE	FALSE	FALSE	0.0300717	66	0	1	65	G	missense_variant	MODERATE	ttr-51	WBGene00010440	transcript	JC8.8	protein_coding
IV	13254279	G	[A]	{G, A}	0.0151515	1	TRUE	FALSE	TRUE	0.0300717	66	0	1	65	A	missense_variant	MODERATE	ttr-45	WBGene00044737	transcript	JC8.14	protein_coding
IV	13255275	G	[C]	{C, G}	0.0151515	1	TRUE	FALSE	FALSE	0.0300717	66	0	1	65	C	missense_variant	MODERATE	ttr-45	WBGene00044737	transcript	JC8.14	protein_coding
IV	13259655	T	[A]	{A, T}	0.0151515	1	TRUE	FALSE	FALSE	0.0300717	66	0	1	65	A	missense_variant	MODERATE	JC8.16	WBGene00194915	transcript	JC8.16	protein_coding
IV	13260161	A	[T]	{A, T}	0.0151515	1	TRUE	FALSE	FALSE	0.0300717	66	0	1	65	T	missense_variant	MODERATE	JC8.16	WBGene00194915	transcript	JC8.16	protein_coding
IV	13260170	T	[A]	{A, T}	0.166667	1	TRUE	FALSE	FALSE	0.279898	66	0	11	55	A	missense_variant	MODERATE	JC8.16	WBGene00194915	transcript	JC8.16	protein_coding
IV	13261322	G	[C]	{C, G}	0.0151515	1	TRUE	FALSE	FALSE	0.0300717	66	0	1	65	C	missense_variant	MODERATE	JC8.16	WBGene00194915	transcript	JC8.16	protein_coding
IV	13262196	T	[A]	{A, T}	0.227273	1	TRUE	FALSE	FALSE	0.353921	66	0	15	51	A	missense_variant	MODERATE	unc-26	WBGene00006763	transcript	JC8.10b	protein_coding
IV	13263448	C	[G]	{C, G}	0.0151515	1	TRUE	FALSE	FALSE	0.0300717	66	0	1	65	G	missense_variant	MODERATE	unc-26	WBGene00006763	transcript	JC8.10b	protein_coding
IV	13263564	G	[T]	{G, T}	0.030303	1	TRUE	FALSE	FALSE	0.0592181	66	0	2	64	T	missense_variant	MODERATE	unc-26	WBGene00006763	transcript	JC8.10b	protein_coding
IV	13265717	C	[T]	{C, T}	0.0151515	1	TRUE	FALSE	TRUE	0.0300717	66	0	1	65	T	missense_variant	MODERATE	unc-26	WBGene00006763	transcript	JC8.10b	protein_coding
IV	13265914	A	[G]	{G, A}	0.030303	1	TRUE	FALSE	TRUE	0.0592181	66	0	2	64	G	missense_variant	MODERATE	unc-26	WBGene00006763	transcript	JC8.10b	protein_coding
IV	13265952	C	[A]	{C, A}	0.0151515	1	TRUE	FALSE	FALSE	0.0300717	66	0	1	65	A	missense_variant	MODERATE	unc-26	WBGene00006763	transcript	JC8.10b	protein_coding
IV	13267184	G	[T]	{G, T}	0.030303	1	TRUE	FALSE	FALSE	0.0592181	66	0	2	64	T	missense_variant	MODERATE	unc-26	WBGene00006763	transcript	JC8.10b	protein_coding
IV	13267562	A	[G]	{G, A}	0.0151515	1	TRUE	FALSE	TRUE	0.0300717	66	0	1	65	G	missense_variant	MODERATE	unc-26	WBGene00006763	transcript	JC8.10b	protein_coding
IV	13267596	C	[A]	{C, A}	0.0151515	1	TRUE	FALSE	FALSE	0.0300717	66	0	1	65	A	missense_variant	MODERATE	unc-26	WBGene00006763	transcript	JC8.10b	protein_coding
IV	13276107	G	[T]	{G, T}	0.0606061	1	TRUE	FALSE	FALSE	0.114735	66	0	4	62	T	missense_variant	MODERATE	cpsf-3	WBGene00013460	transcript	Y67H2A.1	protein_coding
IV	13277500	T	[C]	{C, T}	0.0151515	1	TRUE	FALSE	TRUE	0.0300717	66	0	1	65	C	missense_variant	MODERATE	cpsf-3	WBGene00013460	transcript	Y67H2A.1	protein_coding
IV	13282187	G	[T]	{G, T}	0.0454545	1	TRUE	FALSE	FALSE	0.0874393	66	0	3	63	T	missense_variant	MODERATE	cpsf-3	WBGene00013460	transcript	Y67H2A.1	protein_coding
IV	13284722	T	[G]	{G, T}	0.0151515	1	TRUE	FALSE	FALSE	0.0300717	66	0	1	65	G	missense_variant&splice_region_variant	MODERATE	Y67H2A.10	WBGene00013465	transcript	Y67H2A.10a	protein_coding
IV	13284765	C	[A]	{C, A}	0.0151515	1	TRUE	FALSE	FALSE	0.0300717	66	0	1	65	A	missense_variant	MODERATE	Y67H2A.10	WBGene00013465	transcript	Y67H2A.10a	protein_coding
IV	13284897	CTGTTGTTGT	[CTGTTGTTGTTGT, C]	{CTGTTGTTGTTGT, C, CTGTTGTTGT}	0.030303	1	FALSE	TRUE	FALSE	0.0592181	66	0	2	64	CTGTTGTTGTTGT	conservative_inframe_insertion	MODERATE	Y67H2A.10	WBGene00013465	transcript	Y67H2A.10a	protein_coding
IV	13284898	T	[TGTG]	{TGTG, T}	0.0151515	1	FALSE	TRUE	FALSE	0.0300717	66	0	1	65	TGTG	conservative_inframe_insertion	MODERATE	Y67H2A.10	WBGene00013465	transcript	Y67H2A.10a	protein_coding
IV	13284905	G	[GTTT]	{G, GTTT}	0.0151515	1	FALSE	TRUE	FALSE	0.0300717	66	0	1	65	GTTT	conservative_inframe_insertion	MODERATE	Y67H2A.10	WBGene00013465	transcript	Y67H2A.10a	protein_coding
IV	13284945	T	[G]	{G, T}	0.0151515	1	TRUE	FALSE	FALSE	0.0300717	66	0	1	65	G	missense_variant	MODERATE	Y67H2A.10	WBGene00013465	transcript	Y67H2A.10a	protein_coding
IV	13284957	T	[A]	{A, T}	0.0454545	1	TRUE	FALSE	FALSE	0.0874393	66	0	3	63	A	missense_variant	MODERATE	Y67H2A.10	WBGene00013465	transcript	Y67H2A.10a	protein_coding
IV	13285133	T	[A]	{A, T}	0.0151515	1	TRUE	FALSE	FALSE	0.0300717	66	0	1	65	A	missense_variant	MODERATE	Y67H2A.10	WBGene00013465	transcript	Y67H2A.10a	protein_coding
IV	13285142	CTTGTTGTTGTTG	[CTTGTTG, CTTGTTGTTGTTGTTGTTG, CTTGTTGTTG, CTTG, CTTGTTGTTGTTGTTG, C, CTTGTTGTTGTTGTTGTTGTTGTTG]	{CTTG, CTTGTTG, CTTGTTGTTGTTG, CTTGTTGTTGTTGTTG, CTTGTTGTTGTTGTTGTTG}	0.136364	1	FALSE	TRUE	FALSE	0.237335	66	2	8	56	CTTGTTGTTGTTGTTG	conservative_inframe_insertion	MODERATE	Y67H2A.10	WBGene00013465	transcript	Y67H2A.10a	protein_coding					1794	]]
IV	13285147	T	[TGTC, TGTA]	{TGTC, T}	0.0151515	1	FALSE	TRUE	FALSE	0.0300717	66	0	1	65	TGTA	conservative_inframe_insertion	MODERATE	Y67H2A.10	WBGene00013465	transcript	Y67H2A.10a	protein_coding
IV	13285149	T	[TTGTTGA]	{TTGTTGA, T}	0.0151515	1	FALSE	TRUE	FALSE	0.0300717	66	0	1	65	TTGTTGA	disruptive_inframe_insertion	MODERATE	Y67H2A.10	WBGene00013465	transcript	Y67H2A.10a	protein_coding
IV	13287745	G	[A]	{G, A}	0.0151515	1	TRUE	FALSE	TRUE	0.0300717	66	0	1	65	A	missense_variant	MODERATE	Y67H2A.10	WBGene00013465	transcript	Y67H2A.10a	protein_coding
IV	13287756	TTGA	[T]	{TTGA, T}	0.0151515	1	FALSE	TRUE	FALSE	0.0300717	66	0	1	65	T	disruptive_inframe_deletion	MODERATE	Y67H2A.10	WBGene00013465	transcript	Y67H2A.10a	protein_coding
IV	13289976	CTCT	[CTCTTCT, C]	{C, CTCT}	0.0461538	0.984848	FALSE	TRUE	FALSE	0.0887299	65	2	2	61	CTCTTCT	conservative_inframe_insertion	MODERATE	Y67H2A.2	WBGene00013461	transcript	Y67H2A.2a	protein_coding
IV	13290945	C	[T]	{C, T}	0.0151515	1	TRUE	FALSE	TRUE	0.0300717	66	0	1	65	T	missense_variant	MODERATE	Y67H2A.2	WBGene00013461	transcript	Y67H2A.2d	protein_coding
IV	13297337	C	[G, T]	{C, G, T}	0.0606061	1	TRUE	FALSE	FALSE	0.114735	66	0	4	62	G	missense_variant&splice_region_variant	MODERATE	Y67H2A.2	WBGene00013461	transcript	Y67H2A.2a	protein_coding
IV	13297500	A	[C]	{C, A}	0.030303	1	TRUE	FALSE	FALSE	0.0592181	66	0	2	64	C	missense_variant	MODERATE	Y67H2A.2	WBGene00013461	transcript	Y67H2A.2a	protein_coding
IV	13297510	G	[C]	{C, G}	0.0151515	1	TRUE	FALSE	FALSE	0.0300717	66	0	1	65	C	missense_variant	MODERATE	Y67H2A.2	WBGene00013461	transcript	Y67H2A.2a	protein_coding
IV	13297681	T	[C]	{C, T}	0.0151515	1	TRUE	FALSE	TRUE	0.0300717	66	0	1	65	C	missense_variant	MODERATE	Y67H2A.2	WBGene00013461	transcript	Y67H2A.2a	protein_coding
IV	13298158	G	[C]	{C, G}	0.0151515	1	TRUE	FALSE	FALSE	0.0300717	66	0	1	65	C	missense_variant	MODERATE	micu-1	WBGene00013462	transcript	Y67H2A.4d	protein_coding
IV	13299056	C	[A]	{C, A}	0.0151515	1	TRUE	FALSE	FALSE	0.0300717	66	0	1	65	A	missense_variant	MODERATE	micu-1	WBGene00013462	transcript	Y67H2A.4d	protein_coding
IV	13299387	A	[T]	{A, T}	0.0454545	1	TRUE	FALSE	FALSE	0.0874393	66	0	3	63	T	missense_variant	MODERATE	micu-1	WBGene00013462	transcript	Y67H2A.4d	protein_coding
IV	13300860	A	[T]	{A, T}	0.0151515	1	TRUE	FALSE	FALSE	0.0300717	66	0	1	65	T	missense_variant	MODERATE	csn-6	WBGene00000818	transcript	Y67H2A.6b	protein_coding
IV	13301233	T	[A]	{A, T}	0.030303	1	TRUE	FALSE	FALSE	0.0592181	66	0	2	64	A	missense_variant	MODERATE	csn-6	WBGene00000818	transcript	Y67H2A.6b	protein_coding
IV	13301257	A	[G]	{G, A}	0.0151515	1	TRUE	FALSE	TRUE	0.0300717	66	0	1	65	G	missense_variant	MODERATE	csn-6	WBGene00000818	transcript	Y67H2A.6b	protein_coding
IV	13303490	C	[T]	{C, T}	0.030303	1	TRUE	FALSE	TRUE	0.0592181	66	0	2	64	T	missense_variant	MODERATE	csn-6	WBGene00000818	transcript	Y67H2A.6b	protein_coding
IV	13303804	G	[T]	{G, T}	0.0151515	1	TRUE	FALSE	FALSE	0.0300717	66	0	1	65	T	missense_variant	MODERATE	Y67H2A.7	WBGene00013464	transcript	Y67H2A.7a	protein_coding
IV	13303931	G	[A]	{G, A}	0.030303	1	TRUE	FALSE	TRUE	0.0592181	66	0	2	64	A	missense_variant	MODERATE	Y67H2A.7	WBGene00013464	transcript	Y67H2A.7a	protein_coding
IV	13305728	A	[G]	{G, A}	0.181818	1	TRUE	FALSE	TRUE	0.299792	66	0	12	54	G	missense_variant	MODERATE	Y67H2A.7	WBGene00013464	transcript	Y67H2A.7a	protein_coding
IV	13305818	G	[A]	{G, A}	0.0151515	1	TRUE	FALSE	TRUE	0.0300717	66	0	1	65	A	missense_variant	MODERATE	Y67H2A.7	WBGene00013464	transcript	Y67H2A.7a	protein_coding
IV	13305900	A	[T]	{A, T}	0.0151515	1	TRUE	FALSE	FALSE	0.0300717	66	0	1	65	T	missense_variant	MODERATE	Y67H2A.7	WBGene00013464	transcript	Y67H2A.7a	protein_coding
IV	13307757	G	[T]	{G, T}	0.0151515	1	TRUE	FALSE	FALSE	0.0300717	66	0	1	65	T	missense_variant	MODERATE	Y67H2A.7	WBGene00013464	transcript	Y67H2A.7a	protein_coding
IV	13308985	A	[G]	{G, A}	0.0606061	1	TRUE	FALSE	TRUE	0.114735	66	0	4	62	G	missense_variant	MODERATE	Y67H2A.7	WBGene00013464	transcript	Y67H2A.7a	protein_coding
IV	13309085	G	[A]	{G, A}	0.0151515	1	TRUE	FALSE	TRUE	0.0300717	66	0	1	65	A	missense_variant	MODERATE	Y67H2A.7	WBGene00013464	transcript	Y67H2A.7a	protein_coding
IV	13309462	A	[G]	{G, A}	0.0606061	1	TRUE	FALSE	TRUE	0.114735	66	0	4	62	G	missense_variant	MODERATE	Y67H2A.7	WBGene00013464	transcript	Y67H2A.7a	protein_coding
IV	13309514	A	[G]	{G, A}	0.0606061	1	TRUE	FALSE	TRUE	0.114735	66	0	4	62	G	missense_variant	MODERATE	Y67H2A.7	WBGene00013464	transcript	Y67H2A.7a	protein_coding
IV	13315918	T	[G]	{G, T}	0.0454545	1	TRUE	FALSE	FALSE	0.0874393	66	0	3	63	G	missense_variant	MODERATE	fat-1	WBGene00001393	transcript	Y67H2A.8	protein_coding
IV	13324003	T	[A]	{A, T}	0.0151515	1	TRUE	FALSE	FALSE	0.0300717	66	0	1	65	A	missense_variant	MODERATE	fat-2	WBGene00001394	transcript	W02A2.1a.1	protein_coding
IV	13328563	A	[T]	{A, T}	0.0454545	1	TRUE	FALSE	FALSE	0.0874393	66	0	3	63	T	missense_variant	MODERATE	far-6	WBGene00001390	transcript	W02A2.2	protein_coding
IV	13330951	G	[T]	{G, T}	0.0151515	1	TRUE	FALSE	FALSE	0.0300717	66	0	1	65	T	missense_variant	MODERATE	pqn-74	WBGene00004156	transcript	W02A2.3a	protein_coding
IV	13343033	C	[A]	{C, A}	0.0151515	1	TRUE	FALSE	FALSE	0.0300717	66	0	1	65	A	missense_variant	MODERATE	W02A2.5	WBGene00012190	transcript	W02A2.5	protein_coding
IV	13343650	C	[A]	{C, A}	0.0151515	1	TRUE	FALSE	FALSE	0.0300717	66	0	1	65	A	missense_variant	MODERATE	W02A2.5	WBGene00012190	transcript	W02A2.5	protein_coding
IV	13344512	C	[G]	{C, G}	0.0606061	1	TRUE	FALSE	FALSE	0.114735	66	0	4	62	G	missense_variant	MODERATE	W02A2.5	WBGene00012190	transcript	W02A2.5	protein_coding
IV	13344529	C	[T]	{C, T}	0.0151515	1	TRUE	FALSE	TRUE	0.0300717	66	0	1	65	T	missense_variant	MODERATE	W02A2.5	WBGene00012190	transcript	W02A2.5	protein_coding
IV	13345519	G	[A]	{G, A}	0.0151515	1	TRUE	FALSE	TRUE	0.0300717	66	0	1	65	A	missense_variant	MODERATE	W02A2.5	WBGene00012190	transcript	W02A2.5	protein_coding
IV	13345679	A	[G]	{G, A}	0.0151515	1	TRUE	FALSE	TRUE	0.0300717	66	0	1	65	G	missense_variant	MODERATE	W02A2.5	WBGene00012190	transcript	W02A2.5	protein_coding
IV	13350606	A	[T]	{A, T}	0.0151515	1	TRUE	FALSE	FALSE	0.0300717	66	0	1	65	T	missense_variant	MODERATE	rec-8	WBGene00004333	transcript	W02A2.6a	protein_coding
IV	13351346	C	[T]	{C, T}	0.030303	1	TRUE	FALSE	TRUE	0.0592181	66	0	2	64	T	missense_variant	MODERATE	rec-8	WBGene00004333	transcript	W02A2.6a	protein_coding
IV	13351435	C	[T]	{C, T}	0.0151515	1	TRUE	FALSE	TRUE	0.0300717	66	0	1	65	T	missense_variant	MODERATE	rec-8	WBGene00004333	transcript	W02A2.6a	protein_coding
IV	13351532	G	[A]	{G, A}	0.0454545	1	TRUE	FALSE	TRUE	0.0874393	66	0	3	63	A	missense_variant	MODERATE	rec-8	WBGene00004333	transcript	W02A2.6a	protein_coding
IV	13351715	G	[A]	{G, A}	0.0151515	1	TRUE	FALSE	TRUE	0.0300717	66	0	1	65	A	missense_variant	MODERATE	rec-8	WBGene00004333	transcript	W02A2.6a	protein_coding
IV	13351772	C	[A]	{C, A}	0.0151515	1	TRUE	FALSE	FALSE	0.0300717	66	0	1	65	A	missense_variant	MODERATE	rec-8	WBGene00004333	transcript	W02A2.6a	protein_coding
IV	13354066	T	[G]	{G, T}	0.0757576	1	TRUE	FALSE	FALSE	0.141106	66	0	5	61	G	missense_variant	MODERATE	mex-5	WBGene00003230	transcript	W02A2.7	protein_coding
IV	13354195	C	[T]	{C, T}	0.0454545	1	TRUE	FALSE	TRUE	0.0874393	66	0	3	63	T	missense_variant	MODERATE	mex-5	WBGene00003230	transcript	W02A2.7	protein_coding
IV	13355458	A	[C]	{C, A}	0.181818	1	TRUE	FALSE	FALSE	0.299792	66	0	12	54	C	missense_variant	MODERATE	mex-5	WBGene00003230	transcript	W02A2.7	protein_coding
IV	13357278	T	[C]	{C, T}	0.0454545	1	TRUE	FALSE	TRUE	0.0874393	66	0	3	63	C	missense_variant	MODERATE	W02A2.8	WBGene00012191	transcript	W02A2.8a	protein_coding
IV	13357340	A	[G]	{G, A}	0.0151515	1	TRUE	FALSE	TRUE	0.0300717	66	0	1	65	G	missense_variant	MODERATE	W02A2.8	WBGene00012191	transcript	W02A2.8a	protein_coding
IV	13357381	A	[T]	{A, T}	0.0606061	1	TRUE	FALSE	FALSE	0.114735	66	0	4	62	T	missense_variant	MODERATE	W02A2.8	WBGene00012191	transcript	W02A2.8a	protein_coding
IV	13357554	C	[A]	{C, A}	0.0151515	1	TRUE	FALSE	FALSE	0.0300717	66	0	1	65	A	missense_variant	MODERATE	W02A2.8	WBGene00012191	transcript	W02A2.8a	protein_coding
IV	13357593	A	[T]	{A, T}	0.0454545	1	TRUE	FALSE	FALSE	0.0874393	66	0	3	63	T	missense_variant	MODERATE	W02A2.8	WBGene00012191	transcript	W02A2.8a	protein_coding
IV	13358514	A	[T]	{A, T}	0.0151515	1	TRUE	FALSE	FALSE	0.0300717	66	0	1	65	T	missense_variant	MODERATE	W02A2.8	WBGene00012191	transcript	W02A2.8a	protein_coding
IV	13359516	A	[G]	{G, A}	0.0606061	1	TRUE	FALSE	TRUE	0.114735	66	0	4	62	G	missense_variant	MODERATE	Y62E10A.3	WBGene00013374	transcript	Y62E10A.3	protein_coding
IV	13359743	G	[A]	{G, A}	0.0793651	0.954545	TRUE	FALSE	TRUE	0.147302	63	0	5	58	A	missense_variant	MODERATE	Y62E10A.3	WBGene00013374	transcript	Y62E10A.3	protein_coding
IV	13359746	T	[C]	{C, T}	0.015873	0.954545	TRUE	FALSE	TRUE	0.0314921	63	0	1	62	C	missense_variant	MODERATE	Y62E10A.3	WBGene00013374	transcript	Y62E10A.3	protein_coding
IV	13359789	C	[T]	{C, T}	0.047619	0.954545	TRUE	FALSE	TRUE	0.0914286	63	0	3	60	T	missense_variant	MODERATE	Y62E10A.3	WBGene00013374	transcript	Y62E10A.3	protein_coding
IV	13359951	T	[C]	{C, T}	0.111111	0.954545	TRUE	FALSE	TRUE	0.199111	63	0	7	56	C	missense_variant	MODERATE	Y62E10A.3	WBGene00013374	transcript	Y62E10A.3	protein_coding
IV	13360002	T	[C]	{C, T}	0.015625	0.969697	TRUE	FALSE	TRUE	0.0310039	64	0	1	63	C	missense_variant	MODERATE	Y62E10A.3	WBGene00013374	transcript	Y62E10A.3	protein_coding
IV	13360040	A	[G]	{G, A}	0.015625	0.969697	TRUE	FALSE	TRUE	0.0310039	64	0	1	63	G	missense_variant	MODERATE	Y62E10A.3	WBGene00013374	transcript	Y62E10A.3	protein_coding
IV	13366505	C	[T]	{C, T}	0.0151515	1	TRUE	FALSE	TRUE	0.0300717	66	0	1	65	T	missense_variant	MODERATE	srsx-25	WBGene00013375	transcript	Y62E10A.4a	protein_coding
IV	13367061	C	[G]	{C, G}	0.0151515	1	TRUE	FALSE	FALSE	0.0300717	66	0	1	65	G	missense_variant	MODERATE	srsx-25	WBGene00013375	transcript	Y62E10A.4a	protein_coding
IV	13367735	C	[T]	{C, T}	0.0151515	1	TRUE	FALSE	TRUE	0.0300717	66	0	1	65	T	missense_variant	MODERATE	srsx-25	WBGene00013375	transcript	Y62E10A.4a	protein_coding
IV	13368326	C	[T]	{C, T}	0.0151515	1	TRUE	FALSE	TRUE	0.0300717	66	0	1	65	T	missense_variant	MODERATE	srsx-25	WBGene00013375	transcript	Y62E10A.4a	protein_coding
IV	13369646	A	[AGCG]	{AGCG, A}	0.0151515	1	FALSE	TRUE	FALSE	0.0300717	66	0	1	65	AGCG	disruptive_inframe_insertion	MODERATE	rla-2	WBGene00004410	transcript	Y62E10A.1.1	protein_coding
IV	13371278	T	[A]	{A, T}	0.106061	1	TRUE	FALSE	FALSE	0.191071	66	0	7	59	A	missense_variant	MODERATE	Y62E10A.2	WBGene00013373	transcript	Y62E10A.2.1	protein_coding
IV	13371378	G	[C]	{C, G}	0.0151515	1	TRUE	FALSE	FALSE	0.0300717	66	0	1	65	C	missense_variant	MODERATE	Y62E10A.2	WBGene00013373	transcript	Y62E10A.2.1	protein_coding
IV	13372215	G	[A]	{G, A}	0.0454545	1	TRUE	FALSE	TRUE	0.0874393	66	0	3	63	A	missense_variant	MODERATE	Y62E10A.6	WBGene00013376	transcript	Y62E10A.6	protein_coding
IV	13375412	A	[G]	{G, A}	0.030303	1	TRUE	FALSE	TRUE	0.0592181	66	0	2	64	G	missense_variant	MODERATE	Y62E10A.6	WBGene00013376	transcript	Y62E10A.6	protein_coding
IV	13376969	T	[C]	{C, T}	0.257576	1	TRUE	FALSE	TRUE	0.385381	66	0	17	49	C	missense_variant	MODERATE	Y62E10A.6	WBGene00013376	transcript	Y62E10A.6	protein_coding
IV	13377107	G	[A]	{G, A}	0.030303	1	TRUE	FALSE	TRUE	0.0592181	66	0	2	64	A	missense_variant	MODERATE	Y62E10A.6	WBGene00013376	transcript	Y62E10A.6	protein_coding
IV	13378285	G	[A]	{G, A}	0.0757576	1	TRUE	FALSE	TRUE	0.141106	66	0	5	61	A	missense_variant	MODERATE	mau-8	WBGene00003142	transcript	Y62E10A.8a	protein_coding
IV	13378433	G	[A]	{G, A}	0.0757576	1	TRUE	FALSE	TRUE	0.141106	66	0	5	61	A	missense_variant	MODERATE	mau-8	WBGene00003142	transcript	Y62E10A.8a	protein_coding
IV	13379443	C	[T]	{C, T}	0.0151515	1	TRUE	FALSE	TRUE	0.0300717	66	0	1	65	T	missense_variant	MODERATE	mau-8	WBGene00003142	transcript	Y62E10A.8a	protein_coding
IV	13379456	G	[A]	{G, A}	0.257576	1	TRUE	FALSE	TRUE	0.385381	66	0	17	49	A	missense_variant	MODERATE	mau-8	WBGene00003142	transcript	Y62E10A.8a	protein_coding
IV	13380153	G	[A]	{G, A}	0.030303	1	TRUE	FALSE	TRUE	0.0592181	66	0	2	64	A	missense_variant	MODERATE	mau-8	WBGene00003142	transcript	Y62E10A.8a	protein_coding
IV	13380189	A	[G]	{G, A}	0.0454545	1	TRUE	FALSE	TRUE	0.0874393	66	0	3	63	G	missense_variant	MODERATE	mau-8	WBGene00003142	transcript	Y62E10A.8a	protein_coding
IV	13380267	A	[G]	{G, A}	0.0606061	1	TRUE	FALSE	TRUE	0.114735	66	0	4	62	G	missense_variant	MODERATE	mau-8	WBGene00003142	transcript	Y62E10A.8a	protein_coding
IV	13380301	T	[G]	{G, T}	0.030303	1	TRUE	FALSE	FALSE	0.0592181	66	0	2	64	G	missense_variant	MODERATE	mau-8	WBGene00003142	transcript	Y62E10A.8a	protein_coding
IV	13380310	T	[TGAG]	{TGAG, T}	0.0151515	1	FALSE	TRUE	FALSE	0.0300717	66	0	1	65	TGAG	disruptive_inframe_insertion	MODERATE	mau-8	WBGene00003142	transcript	Y62E10A.8a	protein_coding
IV	13385796	G	[T]	{G, T}	0.0606061	1	TRUE	FALSE	FALSE	0.114735	66	0	4	62	T	missense_variant	MODERATE	Y62E10A.20	WBGene00044745	transcript	Y62E10A.20	protein_coding
IV	13386413	G	[A]	{G, A}	0.0606061	1	TRUE	FALSE	TRUE	0.114735	66	0	4	62	A	missense_variant	MODERATE	mdt-9	WBGene00014938	transcript	Y62E10A.11a.1	protein_coding
IV	13386898	A	[T]	{A, T}	0.0151515	1	TRUE	FALSE	FALSE	0.0300717	66	0	1	65	T	missense_variant	MODERATE	mdt-9	WBGene00014938	transcript	Y62E10A.11b.1	protein_coding
IV	13386913	G	[A]	{G, A}	0.151515	1	TRUE	FALSE	TRUE	0.259079	66	0	10	56	A	missense_variant	MODERATE	mdt-9	WBGene00014938	transcript	Y62E10A.11b.1	protein_coding
IV	13386919	G	[A]	{G, A}	0.030303	1	TRUE	FALSE	TRUE	0.0592181	66	0	2	64	A	missense_variant	MODERATE	mdt-9	WBGene00014938	transcript	Y62E10A.11b.1	protein_coding
IV	13389384	C	[A]	{C, A}	0.409091	1	TRUE	FALSE	FALSE	0.487162	66	0	27	39	A	missense_variant	MODERATE	Y62E10A.13	WBGene00013379	transcript	Y62E10A.13f	protein_coding
IV	13392629	G	[A]	{G, A}	0.0454545	1	TRUE	FALSE	TRUE	0.0874393	66	0	3	63	A	missense_variant	MODERATE	Y62E10A.13	WBGene00013379	transcript	Y62E10A.13f	protein_coding
IV	13398742	T	[A]	{A, T}	0.0151515	1	TRUE	FALSE	FALSE	0.0300717	66	0	1	65	A	missense_variant	MODERATE	Y62E10A.13	WBGene00013379	transcript	Y62E10A.13a	protein_coding
IV	13399395	C	[A]	{C, A}	0.0151515	1	TRUE	FALSE	FALSE	0.0300717	66	0	1	65	A	missense_variant	MODERATE	memi-2	WBGene00013380	transcript	Y62E10A.14	protein_coding
IV	13399816	G	[T]	{G, T}	0.0454545	1	TRUE	FALSE	FALSE	0.0874393	66	0	3	63	T	missense_variant	MODERATE	memi-2	WBGene00013380	transcript	Y62E10A.14	protein_coding
IV	13400255	G	[T]	{G, T}	0.0151515	1	TRUE	FALSE	FALSE	0.0300717	66	0	1	65	T	missense_variant	MODERATE	memi-2	WBGene00013380	transcript	Y62E10A.14	protein_coding
IV	13400380	G	[C]	{C, G}	0.0606061	1	TRUE	FALSE	FALSE	0.114735	66	0	4	62	C	missense_variant	MODERATE	memi-2	WBGene00013380	transcript	Y62E10A.14	protein_coding
IV	13400418	C	[A]	{C, A}	0.0151515	1	TRUE	FALSE	FALSE	0.0300717	66	0	1	65	A	missense_variant	MODERATE	memi-2	WBGene00013380	transcript	Y62E10A.14	protein_coding
IV	13400490	G	[T]	{G, T}	0.0151515	1	TRUE	FALSE	FALSE	0.0300717	66	0	1	65	T	missense_variant	MODERATE	memi-2	WBGene00013380	transcript	Y62E10A.14	protein_coding
IV	13401383	G	[A]	{G, A}	0.0151515	1	TRUE	FALSE	TRUE	0.0300717	66	0	1	65	A	missense_variant	MODERATE	cyp-31A5	WBGene00013381	transcript	Y62E10A.15b	protein_coding
IV	13401897	G	[A]	{G, A}	0.0151515	1	TRUE	FALSE	TRUE	0.0300717	66	0	1	65	A	missense_variant&splice_region_variant	MODERATE	cyp-31A5	WBGene00013381	transcript	Y62E10A.15b	protein_coding
IV	13405675	C	[T]	{C, T}	0.0151515	1	TRUE	FALSE	TRUE	0.0300717	66	0	1	65	T	missense_variant	MODERATE	Y62E10A.19	WBGene00013385	transcript	Y62E10A.19	protein_coding
IV	13405679	T	[C]	{C, T}	0.318182	1	TRUE	FALSE	TRUE	0.437196	66	0	21	45	C	missense_variant	MODERATE	Y62E10A.19	WBGene00013385	transcript	Y62E10A.19	protein_coding
IV	13405746	A	[T]	{A, T}	0.0151515	1	TRUE	FALSE	FALSE	0.0300717	66	0	1	65	T	missense_variant	MODERATE	Y62E10A.19	WBGene00013385	transcript	Y62E10A.19	protein_coding
IV	13405749	C	[T]	{C, T}	0.0454545	1	TRUE	FALSE	TRUE	0.0874393	66	0	3	63	T	missense_variant	MODERATE	Y62E10A.19	WBGene00013385	transcript	Y62E10A.19	protein_coding
IV	13406446	T	[C]	{C, T}	0.0606061	1	TRUE	FALSE	TRUE	0.114735	66	0	4	62	C	missense_variant	MODERATE	Y62E10A.19	WBGene00013385	transcript	Y62E10A.19	protein_coding
IV	13406469	G	[A]	{G, A}	0.0151515	1	TRUE	FALSE	TRUE	0.0300717	66	0	1	65	A	missense_variant	MODERATE	Y62E10A.19	WBGene00013385	transcript	Y62E10A.19	protein_coding
IV	13406521	G	[A]	{G, A}	0.0151515	1	TRUE	FALSE	TRUE	0.0300717	66	0	1	65	A	missense_variant	MODERATE	Y62E10A.19	WBGene00013385	transcript	Y62E10A.19	protein_coding
IV	13408155	C	[T]	{C, T}	0.0454545	1	TRUE	FALSE	TRUE	0.0874393	66	0	3	63	T	missense_variant	MODERATE	Y62E10A.19	WBGene00013385	transcript	Y62E10A.19	protein_coding
IV	13409049	T	[A]	{A, T}	0.121212	1	TRUE	FALSE	FALSE	0.214666	66	0	8	58	A	missense_variant	MODERATE	gcl-1	WBGene00013382	transcript	Y62E10A.16	protein_coding
IV	13409185	C	[T]	{C, T}	0.0151515	1	TRUE	FALSE	TRUE	0.0300717	66	0	1	65	T	missense_variant	MODERATE	gcl-1	WBGene00013382	transcript	Y62E10A.16	protein_coding
IV	13409816	G	[T]	{G, T}	0.0151515	1	TRUE	FALSE	FALSE	0.0300717	66	0	1	65	T	missense_variant	MODERATE	gcl-1	WBGene00013382	transcript	Y62E10A.16	protein_coding
IV	13414059	T	[G]	{G, T}	0.030303	1	TRUE	FALSE	FALSE	0.0592181	66	0	2	64	G	missense_variant	MODERATE	aptf-2	WBGene00013383	transcript	Y62E10A.17b	protein_coding
IV	13414571	C	[T]	{C, T}	0.0454545	1	TRUE	FALSE	TRUE	0.0874393	66	0	3	63	T	missense_variant	MODERATE	aptf-2	WBGene00013383	transcript	Y62E10A.17b	protein_coding
IV	13414793	C	[A]	{C, A}	0.19697	1	TRUE	FALSE	FALSE	0.31876	66	0	13	53	A	missense_variant	MODERATE	aptf-2	WBGene00013383	transcript	Y62E10A.17b	protein_coding
IV	13414856	T	[G]	{G, T}	0.030303	1	TRUE	FALSE	FALSE	0.0592181	66	0	2	64	G	missense_variant	MODERATE	aptf-2	WBGene00013383	transcript	Y62E10A.17b	protein_coding
IV	13415950	T	[C]	{C, T}	0.030303	1	TRUE	FALSE	TRUE	0.0592181	66	0	2	64	C	missense_variant	MODERATE	aptf-2	WBGene00013383	transcript	Y62E10A.17b	protein_coding
IV	13418132	T	[A]	{A, T}	0.0454545	1	TRUE	FALSE	FALSE	0.0874393	66	0	3	63	A	missense_variant	MODERATE	pik-1	WBGene00004029	transcript	K09B11.1a.1	protein_coding
IV	13418145	A	[G]	{G, A}	0.0454545	1	TRUE	FALSE	TRUE	0.0874393	66	0	3	63	G	missense_variant	MODERATE	pik-1	WBGene00004029	transcript	K09B11.1a.1	protein_coding
IV	13421328	G	[A]	{G, A}	0.0151515	1	TRUE	FALSE	TRUE	0.0300717	66	0	1	65	A	missense_variant	MODERATE	pik-1	WBGene00004029	transcript	K09B11.1a.1	protein_coding
IV	13421329	C	[A]	{C, A}	0.0606061	1	TRUE	FALSE	FALSE	0.114735	66	0	4	62	A	missense_variant	MODERATE	pik-1	WBGene00004029	transcript	K09B11.1a.1	protein_coding
IV	13421379	C	[T]	{C, T}	0.0454545	1	TRUE	FALSE	TRUE	0.0874393	66	0	3	63	T	missense_variant	MODERATE	pik-1	WBGene00004029	transcript	K09B11.1a.1	protein_coding
IV	13421388	G	[A]	{G, A}	0.0606061	1	TRUE	FALSE	TRUE	0.114735	66	0	4	62	A	missense_variant	MODERATE	pik-1	WBGene00004029	transcript	K09B11.1a.1	protein_coding
IV	13421415	G	[T, A]	{G, A, T}	0.0757576	1	TRUE	FALSE	FALSE	0.141106	66	0	5	61	A	missense_variant	MODERATE	pik-1	WBGene00004029	transcript	K09B11.1a.1	protein_coding
IV	13424663	T	[A]	{A, T}	0.106061	1	TRUE	FALSE	FALSE	0.191071	66	0	7	59	A	missense_variant	MODERATE	nol-9	WBGene00010709	transcript	K09B11.2a	protein_coding
IV	13424812	G	[C]	{C, G}	0.0151515	1	TRUE	FALSE	FALSE	0.0300717	66	0	1	65	C	missense_variant	MODERATE	nol-9	WBGene00010709	transcript	K09B11.2a	protein_coding
IV	13427329	G	[C]	{C, G}	0.0454545	1	TRUE	FALSE	FALSE	0.0874393	66	0	3	63	C	missense_variant	MODERATE	nol-9	WBGene00010709	transcript	K09B11.2a	protein_coding
IV	13427396	C	[T]	{C, T}	0.0151515	1	TRUE	FALSE	TRUE	0.0300717	66	0	1	65	T	missense_variant	MODERATE	nol-9	WBGene00010709	transcript	K09B11.2a	protein_coding
IV	13428242	T	[C]	{C, T}	0.030303	1	TRUE	FALSE	TRUE	0.0592181	66	0	2	64	C	missense_variant	MODERATE	nol-9	WBGene00010709	transcript	K09B11.2a	protein_coding
IV	13428275	A	[G]	{G, A}	0.287879	1	TRUE	FALSE	TRUE	0.413139	66	0	19	47	G	missense_variant	MODERATE	nol-9	WBGene00010709	transcript	K09B11.2a	protein_coding
IV	13429206	A	[G]	{G, A}	0.030303	1	TRUE	FALSE	TRUE	0.0592181	66	0	2	64	G	missense_variant	MODERATE	nol-9	WBGene00010709	transcript	K09B11.2a	protein_coding
IV	13429212	A	[G]	{G, A}	0.0454545	1	TRUE	FALSE	TRUE	0.0874393	66	0	3	63	G	missense_variant	MODERATE	nol-9	WBGene00010709	transcript	K09B11.2a	protein_coding
IV	13429693	A	[C]	{C, A}	0.0151515	1	TRUE	FALSE	FALSE	0.0300717	66	0	1	65	C	missense_variant	MODERATE	K09B11.4	WBGene00010711	transcript	K09B11.4	protein_coding
IV	13429942	T	[C]	{C, T}	0.106061	1	TRUE	FALSE	TRUE	0.191071	66	0	7	59	C	missense_variant	MODERATE	K09B11.4	WBGene00010711	transcript	K09B11.4	protein_coding
IV	13431583	C	[A]	{C, A}	0.0454545	1	TRUE	FALSE	FALSE	0.0874393	66	0	3	63	A	missense_variant	MODERATE	K09B11.5	WBGene00010712	transcript	K09B11.5a	protein_coding
IV	13431584	C	[A]	{C, A}	0.030303	1	TRUE	FALSE	FALSE	0.0592181	66	0	2	64	A	missense_variant	MODERATE	K09B11.5	WBGene00010712	transcript	K09B11.5a	protein_coding
IV	13431617	C	[T]	{C, T}	0.030303	1	TRUE	FALSE	TRUE	0.0592181	66	0	2	64	T	missense_variant	MODERATE	K09B11.5	WBGene00010712	transcript	K09B11.5a	protein_coding
IV	13431793	A	[C]	{C, A}	0.0454545	1	TRUE	FALSE	FALSE	0.0874393	66	0	3	63	C	missense_variant&splice_region_variant	MODERATE	K09B11.5	WBGene00010712	transcript	K09B11.5a	protein_coding
IV	13431879	C	[T]	{C, T}	0.151515	1	TRUE	FALSE	TRUE	0.259079	66	0	10	56	T	missense_variant	MODERATE	K09B11.5	WBGene00010712	transcript	K09B11.5a	protein_coding
IV	13431912	C	[A]	{C, A}	0.136364	1	TRUE	FALSE	FALSE	0.237335	66	0	9	57	A	missense_variant	MODERATE	K09B11.5	WBGene00010712	transcript	K09B11.5a	protein_coding
IV	13431962	A	[T]	{A, T}	0.0681818	1	TRUE	FALSE	FALSE	0.128036	66	1	4	61	T	missense_variant	MODERATE	K09B11.5	WBGene00010712	transcript	K09B11.5a	protein_coding
IV	13431963	C	[G]	{C, G}	0.0681818	1	TRUE	FALSE	FALSE	0.128036	66	1	4	61	G	missense_variant	MODERATE	K09B11.5	WBGene00010712	transcript	K09B11.5a	protein_coding
IV	13431964	T	[G]	{G, T}	0.0681818	1	TRUE	FALSE	FALSE	0.128036	66	1	4	61	G	missense_variant	MODERATE	K09B11.5	WBGene00010712	transcript	K09B11.5a	protein_coding
IV	13431977	T	[G]	{G, T}	0.0681818	1	TRUE	FALSE	FALSE	0.128036	66	1	4	61	G	missense_variant	MODERATE	K09B11.5	WBGene00010712	transcript	K09B11.5a	protein_coding
IV	13432561	T	[A]	{A, T}	0.0909091	1	TRUE	FALSE	FALSE	0.166551	66	0	6	60	A	missense_variant	MODERATE	K09B11.5	WBGene00010712	transcript	K09B11.5a	protein_coding
IV	13432574	G	[A]	{G, A}	0.0454545	1	TRUE	FALSE	TRUE	0.0874393	66	0	3	63	A	missense_variant	MODERATE	K09B11.5	WBGene00010712	transcript	K09B11.5a	protein_coding
IV	13432673	A	[T]	{A, T}	0.106061	1	TRUE	FALSE	FALSE	0.191071	66	0	7	59	T	missense_variant	MODERATE	K09B11.5	WBGene00010712	transcript	K09B11.5a	protein_coding
IV	13433028	A	[G]	{G, A}	0.393939	1	TRUE	FALSE	TRUE	0.481147	66	2	25	39	G	missense_variant	MODERATE	K09B11.5	WBGene00010712	transcript	K09B11.5a	protein_coding
IV	13433054	G	[A]	{G, A}	0.0227273	1	TRUE	FALSE	TRUE	0.0447606	66	1	1	64	A	missense_variant	MODERATE	K09B11.5	WBGene00010712	transcript	K09B11.5a	protein_coding
IV	13433064	A	[G]	{G, A}	0.0151515	1	TRUE	FALSE	TRUE	0.0300717	66	0	1	65	G	missense_variant	MODERATE	K09B11.5	WBGene00010712	transcript	K09B11.5a	protein_coding
IV	13433188	A	[T]	{A, T}	0.166667	1	TRUE	FALSE	FALSE	0.279898	66	8	7	51	T	missense_variant	MODERATE	K09B11.5	WBGene00010712	transcript	K09B11.5a	protein_coding
IV	13433208	G	[C]	{C, G}	0.0681818	1	TRUE	FALSE	FALSE	0.128036	66	1	4	61	C	missense_variant	MODERATE	K09B11.5	WBGene00010712	transcript	K09B11.5a	protein_coding
IV	13433220	T	[A]	{A, T}	0.0681818	1	TRUE	FALSE	FALSE	0.128036	66	1	4	61	A	missense_variant	MODERATE	K09B11.5	WBGene00010712	transcript	K09B11.5a	protein_coding
IV	13433248	C	[T]	{C, T}	0.030303	1	TRUE	FALSE	TRUE	0.0592181	66	0	2	64	T	missense_variant	MODERATE	K09B11.5	WBGene00010712	transcript	K09B11.5a	protein_coding
IV	13433954	T	[G]	{G, T}	0.0151515	1	TRUE	FALSE	FALSE	0.0300717	66	0	1	65	G	missense_variant	MODERATE	K09B11.5	WBGene00010712	transcript	K09B11.5a	protein_coding
IV	13433968	A	[T]	{A, T}	0.030303	1	TRUE	FALSE	FALSE	0.0592181	66	0	2	64	T	missense_variant	MODERATE	K09B11.5	WBGene00010712	transcript	K09B11.5a	protein_coding
IV	13435519	C	[T]	{C, T}	0.0151515	1	TRUE	FALSE	TRUE	0.0300717	66	0	1	65	T	missense_variant&splice_region_variant	MODERATE	mam-3	WBGene00010714	transcript	K09B11.10	protein_coding
IV	13435561	C	[T]	{C, T}	0.0151515	1	TRUE	FALSE	TRUE	0.0300717	66	0	1	65	T	missense_variant	MODERATE	mam-3	WBGene00010714	transcript	K09B11.10	protein_coding
IV	13439799	C	[T]	{C, T}	0.0454545	1	TRUE	FALSE	TRUE	0.0874393	66	0	3	63	T	missense_variant	MODERATE	mam-3	WBGene00010714	transcript	K09B11.10	protein_coding
IV	13440273	C	[T]	{C, T}	0.0454545	1	TRUE	FALSE	TRUE	0.0874393	66	0	3	63	T	missense_variant	MODERATE	mam-3	WBGene00010714	transcript	K09B11.10	protein_coding
IV	13440423	G	[A]	{G, A}	0.030303	1	TRUE	FALSE	TRUE	0.0592181	66	0	2	64	A	missense_variant	MODERATE	mam-3	WBGene00010714	transcript	K09B11.10	protein_coding
IV	13440424	T	[A]	{A, T}	0.030303	1	TRUE	FALSE	FALSE	0.0592181	66	0	2	64	A	missense_variant	MODERATE	mam-3	WBGene00010714	transcript	K09B11.10	protein_coding
IV	13446175	C	[T]	{C, T}	0.0151515	1	TRUE	FALSE	TRUE	0.0300717	66	0	1	65	T	missense_variant&splice_region_variant	MODERATE	uso-1	WBGene00010713	transcript	K09B11.9a	protein_coding
IV	13447513	C	[T]	{C, T}	0.0151515	1	TRUE	FALSE	TRUE	0.0300717	66	0	1	65	T	missense_variant	MODERATE	uso-1	WBGene00010713	transcript	K09B11.9a	protein_coding
IV	13448094	T	[A]	{A, T}	0.0606061	1	TRUE	FALSE	FALSE	0.114735	66	0	4	62	A	missense_variant	MODERATE	uso-1	WBGene00010713	transcript	K09B11.9a	protein_coding
IV	13449393	C	[G]	{C, G}	0.0454545	1	TRUE	FALSE	FALSE	0.0874393	66	0	3	63	G	missense_variant	MODERATE	uso-1	WBGene00010713	transcript	K09B11.9a	protein_coding
IV	13449400	T	[A]	{A, T}	0.0454545	1	TRUE	FALSE	FALSE	0.0874393	66	0	3	63	A	missense_variant	MODERATE	uso-1	WBGene00010713	transcript	K09B11.9a	protein_coding
IV	13453778	T	[C]	{C, T}	0.030303	1	TRUE	FALSE	TRUE	0.0592181	66	0	2	64	C	missense_variant	MODERATE	uso-1	WBGene00010713	transcript	K09B11.9a	protein_coding
IV	13455549	G	[T, A]	{G, T}	0.0307692	0.984848	TRUE	FALSE	FALSE	0.0601073	65	0	2	63	A	missense_variant	MODERATE	Y38H8A.7	WBGene00012640	transcript	Y38H8A.7	protein_coding
IV	13470642	A	[C]	{C, A}	0.030303	1	TRUE	FALSE	FALSE	0.0592181	66	0	2	64	C	missense_variant	MODERATE	Y38H8A.4	WBGene00012638	transcript	Y38H8A.4	protein_coding
IV	13470978	G	[A]	{G, A}	0.03125	0.969697	TRUE	FALSE	TRUE	0.0610236	64	0	2	62	A	missense_variant	MODERATE	Y38H8A.4	WBGene00012638	transcript	Y38H8A.4	protein_coding
IV	13473101	A	[G]	{G, A}	0.0461538	0.984848	TRUE	FALSE	TRUE	0.0887299	65	0	3	62	G	missense_variant	MODERATE	Y38H8A.3	WBGene00012637	transcript	Y38H8A.3	protein_coding
IV	13473163	C	[A]	{C, A}	0.0461538	0.984848	TRUE	FALSE	FALSE	0.0887299	65	0	3	62	A	missense_variant	MODERATE	Y38H8A.3	WBGene00012637	transcript	Y38H8A.3	protein_coding
IV	13473681	T	[C]	{C, T}	0.307692	0.984848	TRUE	FALSE	TRUE	0.429338	65	0	20	45	C	missense_variant	MODERATE	Y38H8A.3	WBGene00012637	transcript	Y38H8A.3	protein_coding
IV	13473825	T	[A]	{A, T}	0.0153846	0.984848	TRUE	FALSE	FALSE	0.0305307	65	0	1	64	A	missense_variant	MODERATE	Y38H8A.3	WBGene00012637	transcript	Y38H8A.3	protein_coding
IV	13473841	G	[C]	{C, G}	0.0153846	0.984848	TRUE	FALSE	FALSE	0.0305307	65	0	1	64	C	missense_variant	MODERATE	Y38H8A.3	WBGene00012637	transcript	Y38H8A.3	protein_coding
IV	13474550	T	[A]	{A, T}	0.0615385	0.984848	TRUE	FALSE	FALSE	0.116398	65	0	4	61	A	missense_variant	MODERATE	Y38H8A.2	WBGene00012636	transcript	Y38H8A.2a	protein_coding
IV	13475083	C	[A]	{C, A}	0.0615385	0.984848	TRUE	FALSE	FALSE	0.116398	65	0	4	61	A	missense_variant	MODERATE	Y38H8A.2	WBGene00012636	transcript	Y38H8A.2a	protein_coding
IV	13475089	C	[T]	{C, T}	0.0153846	0.984848	TRUE	FALSE	TRUE	0.0305307	65	0	1	64	T	missense_variant	MODERATE	Y38H8A.2	WBGene00012636	transcript	Y38H8A.2a	protein_coding
IV	13476005	C	[T]	{C, T}	0.0615385	0.984848	TRUE	FALSE	TRUE	0.116398	65	0	4	61	T	missense_variant	MODERATE	Y38H8A.2	WBGene00012636	transcript	Y38H8A.2a	protein_coding
IV	13478195	C	[T]	{C, T}	0.015625	0.969697	TRUE	FALSE	TRUE	0.0310039	64	0	1	63	T	missense_variant	MODERATE	tbc-9	WBGene00012868	transcript	Y45F10A.6a	protein_coding
IV	13478306	C	[T]	{C, T}	0.0153846	0.984848	TRUE	FALSE	TRUE	0.0305307	65	0	1	64	T	missense_variant	MODERATE	tbc-9	WBGene00012868	transcript	Y45F10A.6a	protein_coding
IV	13479796	G	[A]	{G, A}	0.030303	1	TRUE	FALSE	TRUE	0.0592181	66	0	2	64	A	missense_variant	MODERATE	tbc-9	WBGene00012868	transcript	Y45F10A.6a	protein_coding
IV	13483849	AAGAATATCCAAC	[A]	{AAGAATATCCAAC, A}	0.0151515	1	FALSE	TRUE	FALSE	0.0300717	66	0	1	65	A	conservative_inframe_deletion	MODERATE	Y38H8A.1	WBGene00012635	transcript	Y38H8A.1	protein_coding
IV	13483900	AGACACAAGGAGTGAAAAATCCAAAATT	[A]	{AGACACAAGGAGTGAAAAATCCAAAATT, A}	0.0454545	1	FALSE	TRUE	FALSE	0.0874393	66	0	3	63	A	disruptive_inframe_deletion	MODERATE	Y38H8A.1	WBGene00012635	transcript	Y38H8A.1	protein_coding
IV	13483952	G	[A]	{G, A}	0.0151515	1	TRUE	FALSE	TRUE	0.0300717	66	0	1	65	A	missense_variant	MODERATE	Y38H8A.1	WBGene00012635	transcript	Y38H8A.1	protein_coding
IV	13485708	T	[C]	{C, T}	0.0151515	1	TRUE	FALSE	TRUE	0.0300717	66	0	1	65	C	missense_variant	MODERATE	tbc-9	WBGene00012868	transcript	Y45F10A.6a	protein_coding
IV	13488214	T	[A]	{A, T}	0.0151515	1	TRUE	FALSE	FALSE	0.0300717	66	0	1	65	A	missense_variant	MODERATE	tbc-9	WBGene00012868	transcript	Y45F10A.6a	protein_coding
IV	13488578	G	[T]	{G, T}	0.030303	1	TRUE	FALSE	FALSE	0.0592181	66	0	2	64	T	missense_variant	MODERATE	tbc-9	WBGene00012868	transcript	Y45F10A.6a	protein_coding
IV	13489490	C	[T]	{C, T}	0.0151515	1	TRUE	FALSE	TRUE	0.0300717	66	0	1	65	T	missense_variant	MODERATE	tbc-9	WBGene00012868	transcript	Y45F10A.6a	protein_coding
IV	13489493	C	[T]	{C, T}	0.0151515	1	TRUE	FALSE	TRUE	0.0300717	66	0	1	65	T	missense_variant	MODERATE	tbc-9	WBGene00012868	transcript	Y45F10A.6a	protein_coding
IV	13492661	G	[A]	{G, A}	0.145161	0.939394	TRUE	FALSE	TRUE	0.250197	62	0	9	53	A	missense_variant	MODERATE	Y45F10A.7	WBGene00012869	transcript	Y45F10A.7a	protein_coding
IV	13492897	A	[T]	{A, T}	0.016129	0.939394	TRUE	FALSE	FALSE	0.0319958	62	0	1	61	T	missense_variant	MODERATE	Y45F10A.7	WBGene00012869	transcript	Y45F10A.7a	protein_coding
IV	13493690	A	[G]	{G, A}	0.0151515	1	TRUE	FALSE	TRUE	0.0300717	66	0	1	65	G	missense_variant	MODERATE	Y45F10A.7	WBGene00012869	transcript	Y45F10A.7a	protein_coding
IV	13494943	C	[A]	{C, A}	0.0757576	1	TRUE	FALSE	FALSE	0.141106	66	0	5	61	A	missense_variant	MODERATE	Y45F10A.7	WBGene00012869	transcript	Y45F10A.7b	protein_coding
IV	13494953	A	[T]	{A, T}	0.0606061	1	TRUE	FALSE	FALSE	0.114735	66	0	4	62	T	missense_variant	MODERATE	Y45F10A.7	WBGene00012869	transcript	Y45F10A.7b	protein_coding
IV	13495421	T	[G]	{G, T}	0.0757576	1	TRUE	FALSE	FALSE	0.141106	66	0	5	61	G	missense_variant	MODERATE	Y45F10A.7	WBGene00012869	transcript	Y45F10A.7a	protein_coding
IV	13495532	A	[T]	{A, T}	0.0151515	1	TRUE	FALSE	FALSE	0.0300717	66	0	1	65	T	missense_variant	MODERATE	Y45F10A.7	WBGene00012869	transcript	Y45F10A.7a	protein_coding
IV	13495578	C	[A]	{C, A}	0.0606061	1	TRUE	FALSE	FALSE	0.114735	66	0	4	62	A	missense_variant	MODERATE	Y45F10A.7	WBGene00012869	transcript	Y45F10A.7a	protein_coding
IV	13496728	C	[A]	{C, A}	0.0151515	1	TRUE	FALSE	FALSE	0.0300717	66	0	1	65	A	missense_variant	MODERATE	Y45F10A.7	WBGene00012869	transcript	Y45F10A.7a	protein_coding
IV	13501205	T	[A]	{A, T}	0.0757576	1	TRUE	FALSE	FALSE	0.141106	66	0	5	61	A	missense_variant	MODERATE	tbc-9	WBGene00012868	transcript	Y45F10A.6a	protein_coding
IV	13505658	A	[T]	{A, T}	0.0151515	1	TRUE	FALSE	FALSE	0.0300717	66	0	1	65	T	missense_variant	MODERATE	nlp-17	WBGene00003755	transcript	Y45F10A.5	protein_coding
IV	13505665	T	[C]	{C, T}	0.0151515	1	TRUE	FALSE	TRUE	0.0300717	66	0	1	65	C	missense_variant	MODERATE	nlp-17	WBGene00003755	transcript	Y45F10A.5	protein_coding
IV	13505692	G	[A]	{G, A}	0.227273	1	TRUE	FALSE	TRUE	0.353921	66	0	15	51	A	missense_variant	MODERATE	nlp-17	WBGene00003755	transcript	Y45F10A.5	protein_coding
IV	13506156	G	[C]	{C, G}	0.0151515	1	TRUE	FALSE	FALSE	0.0300717	66	0	1	65	C	missense_variant	MODERATE	seld-1	WBGene00012867	transcript	Y45F10A.4	protein_coding
IV	13506157	T	[A]	{A, T}	0.0151515	1	TRUE	FALSE	FALSE	0.0300717	66	0	1	65	A	missense_variant	MODERATE	seld-1	WBGene00012867	transcript	Y45F10A.4	protein_coding
IV	13506953	A	[G]	{G, A}	0.0625	0.969697	TRUE	FALSE	TRUE	0.11811	64	0	4	60	G	missense_variant&splice_region_variant	MODERATE	seld-1	WBGene00012867	transcript	Y45F10A.4	protein_coding
IV	13507692	G	[T]	{G, T}	0.015625	0.969697	TRUE	FALSE	FALSE	0.0310039	64	0	1	63	T	missense_variant	MODERATE	seld-1	WBGene00012867	transcript	Y45F10A.4	protein_coding
IV	13507914	C	[A]	{C, A}	0.046875	0.969697	TRUE	FALSE	FALSE	0.0900591	64	0	3	61	A	missense_variant	MODERATE	seld-1	WBGene00012867	transcript	Y45F10A.4	protein_coding
IV	13507926	G	[A]	{G, A}	0.03125	0.969697	TRUE	FALSE	TRUE	0.0610236	64	0	2	62	A	missense_variant	MODERATE	seld-1	WBGene00012867	transcript	Y45F10A.4	protein_coding
IV	13507959	A	[G]	{G, A}	0.40625	0.969697	TRUE	FALSE	TRUE	0.48622	64	0	26	38	G	missense_variant	MODERATE	seld-1	WBGene00012867	transcript	Y45F10A.4	protein_coding
IV	13508034	G	[C]	{C, G}	0.0625	0.969697	TRUE	FALSE	FALSE	0.11811	64	0	4	60	C	missense_variant	MODERATE	seld-1	WBGene00012867	transcript	Y45F10A.4	protein_coding
IV	13511302	G	[A]	{G, A}	0.348485	1	TRUE	FALSE	TRUE	0.457553	66	0	23	43	A	missense_variant	MODERATE	puf-3	WBGene00004239	transcript	Y45F10A.2	protein_coding
IV	13511580	G	[T]	{G, T}	0.0151515	1	TRUE	FALSE	FALSE	0.0300717	66	0	1	65	T	missense_variant	MODERATE	puf-3	WBGene00004239	transcript	Y45F10A.2	protein_coding
IV	13512132	G	[A]	{G, A}	0.030303	1	TRUE	FALSE	TRUE	0.0592181	66	0	2	64	A	missense_variant	MODERATE	puf-3	WBGene00004239	transcript	Y45F10A.2	protein_coding
IV	13512560	C	[A]	{C, A}	0.0909091	1	TRUE	FALSE	FALSE	0.166551	66	0	6	60	A	missense_variant	MODERATE	afmd-2	WBGene00012866	transcript	Y45F10A.3a	protein_coding
IV	13512585	A	[T]	{A, T}	0.0151515	1	TRUE	FALSE	FALSE	0.0300717	66	0	1	65	T	missense_variant	MODERATE	afmd-2	WBGene00012866	transcript	Y45F10A.3a	protein_coding
IV	13512631	G	[A]	{G, A}	0.0151515	1	TRUE	FALSE	TRUE	0.0300717	66	0	1	65	A	missense_variant	MODERATE	afmd-2	WBGene00012866	transcript	Y45F10A.3a	protein_coding
IV	13513344	A	[T]	{A, T}	0.318182	1	TRUE	FALSE	FALSE	0.437196	66	0	21	45	T	missense_variant	MODERATE	afmd-2	WBGene00012866	transcript	Y45F10A.3a	protein_coding
IV	13514740	C	[T]	{C, T}	0.287879	1	TRUE	FALSE	TRUE	0.413139	66	0	19	47	T	missense_variant	MODERATE	dcap-2	WBGene00003582	transcript	F52G2.1b	protein_coding
IV	13516952	G	[T]	{G, T}	0.287879	1	TRUE	FALSE	FALSE	0.413139	66	0	19	47	T	missense_variant	MODERATE	dcap-2	WBGene00003582	transcript	F52G2.1b	protein_coding
IV	13516959	A	[G]	{G, A}	0.257576	1	TRUE	FALSE	TRUE	0.385381	66	0	17	49	G	missense_variant	MODERATE	dcap-2	WBGene00003582	transcript	F52G2.1b	protein_coding
IV	13520354	C	[T]	{C, T}	0.0151515	1	TRUE	FALSE	TRUE	0.0300717	66	0	1	65	T	missense_variant	MODERATE	dcap-2	WBGene00003582	transcript	F52G2.1b	protein_coding
IV	13520367	C	[A]	{C, A}	0.0909091	1	TRUE	FALSE	FALSE	0.166551	66	0	6	60	A	missense_variant	MODERATE	dcap-2	WBGene00003582	transcript	F52G2.1b	protein_coding
IV	13520495	C	[T]	{C, T}	0.0151515	1	TRUE	FALSE	TRUE	0.0300717	66	0	1	65	T	missense_variant	MODERATE	dcap-2	WBGene00003582	transcript	F52G2.1b	protein_coding
IV	13520537	G	[T]	{G, T}	0.106061	1	TRUE	FALSE	FALSE	0.191071	66	0	7	59	T	missense_variant	MODERATE	dcap-2	WBGene00003582	transcript	F52G2.1b	protein_coding
IV	13520539	C	[T]	{C, T}	0.106061	1	TRUE	FALSE	TRUE	0.191071	66	0	7	59	T	missense_variant	MODERATE	dcap-2	WBGene00003582	transcript	F52G2.1b	protein_coding
IV	13520540	C	[T]	{C, T}	0.106061	1	TRUE	FALSE	TRUE	0.191071	66	0	7	59	T	missense_variant	MODERATE	dcap-2	WBGene00003582	transcript	F52G2.1b	protein_coding
IV	13520555	AAGCCGG	[A]	{AAGCCGG, A}	0.0833333	1	FALSE	TRUE	FALSE	0.153944	66	1	5	60	A	conservative_inframe_deletion	MODERATE	dcap-2	WBGene00003582	transcript	F52G2.1b	protein_coding
IV	13520560	GGAGCCT	[G]	{G, GGAGCCT}	0.0163934	0.924242	FALSE	TRUE	FALSE	0.0325159	61	0	1	60	G	disruptive_inframe_deletion	MODERATE	dcap-2	WBGene00003582	transcript	F52G2.1b	protein_coding
IV	13520564	CCTG	[C]	{C, CCTG}	0.106061	1	FALSE	TRUE	FALSE	0.191071	66	0	7	59	C	conservative_inframe_deletion	MODERATE	dcap-2	WBGene00003582	transcript	F52G2.1b	protein_coding
IV	13520569	G	[A]	{G, A}	0.106061	1	TRUE	FALSE	TRUE	0.191071	66	0	7	59	A	missense_variant	MODERATE	dcap-2	WBGene00003582	transcript	F52G2.1b	protein_coding
IV	13520633	C	[G]	{C, G}	0.0909091	1	TRUE	FALSE	FALSE	0.166551	66	0	6	60	G	missense_variant	MODERATE	dcap-2	WBGene00003582	transcript	F52G2.1b	protein_coding
IV	13522957	A	[C]	{C, A}	0.0757576	1	TRUE	FALSE	FALSE	0.141106	66	0	5	61	C	missense_variant	MODERATE	rsd-2	WBGene00004681	transcript	F52G2.2a	protein_coding
IV	13522958	A	[T]	{A, T}	0.0151515	1	TRUE	FALSE	FALSE	0.0300717	66	0	1	65	T	missense_variant	MODERATE	rsd-2	WBGene00004681	transcript	F52G2.2a	protein_coding
IV	13522959	T	[G]	{G, T}	0.0151515	1	TRUE	FALSE	FALSE	0.0300717	66	0	1	65	G	missense_variant	MODERATE	rsd-2	WBGene00004681	transcript	F52G2.2a	protein_coding
IV	13523016	A	[G]	{G, A}	0.0151515	1	TRUE	FALSE	TRUE	0.0300717	66	0	1	65	G	missense_variant	MODERATE	rsd-2	WBGene00004681	transcript	F52G2.2a	protein_coding
IV	13523066	G	[A]	{G, A}	0.0151515	1	TRUE	FALSE	TRUE	0.0300717	66	0	1	65	A	missense_variant	MODERATE	rsd-2	WBGene00004681	transcript	F52G2.2a	protein_coding
IV	13523083	C	[CGGT]	{CGGT, C}	0.030303	1	FALSE	TRUE	FALSE	0.0592181	66	0	2	64	CGGT	disruptive_inframe_insertion	MODERATE	rsd-2	WBGene00004681	transcript	F52G2.2a	protein_coding
IV	13523208	G	[A]	{G, A}	0.393939	1	TRUE	FALSE	TRUE	0.481147	66	0	26	40	A	missense_variant	MODERATE	rsd-2	WBGene00004681	transcript	F52G2.2a	protein_coding
IV	13523259	C	[T]	{C, T}	0.0151515	1	TRUE	FALSE	TRUE	0.0300717	66	0	1	65	T	missense_variant	MODERATE	rsd-2	WBGene00004681	transcript	F52G2.2a	protein_coding
IV	13523288	C	[T]	{C, T}	0.0151515	1	TRUE	FALSE	TRUE	0.0300717	66	0	1	65	T	missense_variant	MODERATE	rsd-2	WBGene00004681	transcript	F52G2.2a	protein_coding
IV	13523310	T	[G, A]	{G, A, T}	0.121212	1	TRUE	FALSE	FALSE	0.214666	66	0	8	58	A	missense_variant	MODERATE	rsd-2	WBGene00004681	transcript	F52G2.2a	protein_coding
IV	13523338	C	[CTGT]	{C, CTGT}	0.0151515	1	FALSE	TRUE	FALSE	0.0300717	66	0	1	65	CTGT	disruptive_inframe_insertion	MODERATE	rsd-2	WBGene00004681	transcript	F52G2.2a	protein_coding
IV	13523351	T	[C]	{C, T}	0.030303	1	TRUE	FALSE	TRUE	0.0592181	66	0	2	64	C	missense_variant	MODERATE	rsd-2	WBGene00004681	transcript	F52G2.2a	protein_coding
IV	13523353	A	[C]	{C, A}	0.030303	1	TRUE	FALSE	FALSE	0.0592181	66	0	2	64	C	missense_variant	MODERATE	rsd-2	WBGene00004681	transcript	F52G2.2a	protein_coding
IV	13523360	C	[T]	{C, T}	0.166667	1	TRUE	FALSE	TRUE	0.279898	66	0	11	55	T	missense_variant	MODERATE	rsd-2	WBGene00004681	transcript	F52G2.2a	protein_coding
IV	13523363	A	[G]	{G, A}	0.0909091	1	TRUE	FALSE	TRUE	0.166551	66	0	6	60	G	missense_variant	MODERATE	rsd-2	WBGene00004681	transcript	F52G2.2a	protein_coding
IV	13523364	A	[G]	{G, A}	0.106061	1	TRUE	FALSE	TRUE	0.191071	66	0	7	59	G	missense_variant	MODERATE	rsd-2	WBGene00004681	transcript	F52G2.2a	protein_coding
IV	13524557	C	[T]	{C, T}	0.0151515	1	TRUE	FALSE	TRUE	0.0300717	66	0	1	65	T	missense_variant	MODERATE	rsd-2	WBGene00004681	transcript	F52G2.2a	protein_coding
IV	13525814	A	[G]	{G, A}	0.106061	1	TRUE	FALSE	TRUE	0.191071	66	0	7	59	G	missense_variant	MODERATE	rsd-2	WBGene00004681	transcript	F52G2.2a	protein_coding
IV	13525819	T	[C]	{C, T}	0.106061	1	TRUE	FALSE	TRUE	0.191071	66	0	7	59	C	missense_variant	MODERATE	rsd-2	WBGene00004681	transcript	F52G2.2a	protein_coding
IV	13529279	C	[T]	{C, T}	0.138462	0.984848	TRUE	FALSE	TRUE	0.240429	65	0	9	56	T	missense_variant	MODERATE	rsd-2	WBGene00004681	transcript	F52G2.2a	protein_coding
IV	13529301	CGGT	[C]	{C, CGGT}	0.0153846	0.984848	FALSE	TRUE	FALSE	0.0305307	65	0	1	64	C	disruptive_inframe_deletion	MODERATE	rsd-2	WBGene00004681	transcript	F52G2.2a	protein_coding
IV	13529416	G	[T]	{G, T}	0.153846	0.984848	TRUE	FALSE	FALSE	0.262373	65	0	10	55	T	missense_variant	MODERATE	rsd-2	WBGene00004681	transcript	F52G2.2a	protein_coding
IV	13529442	T	[A, C]	{C, A, T}	0.153846	0.984848	TRUE	FALSE	FALSE	0.262373	65	0	10	55	A	missense_variant	MODERATE	rsd-2	WBGene00004681	transcript	F52G2.2a	protein_coding
IV	13529535	A	[C]	{C, A}	0.138462	0.984848	TRUE	FALSE	FALSE	0.240429	65	0	9	56	C	missense_variant	MODERATE	rsd-2	WBGene00004681	transcript	F52G2.2a	protein_coding
IV	13529539	C	[T]	{C, T}	0.138462	0.984848	TRUE	FALSE	TRUE	0.240429	65	0	9	56	T	missense_variant	MODERATE	rsd-2	WBGene00004681	transcript	F52G2.2a	protein_coding
IV	13529545	T	[A]	{A, T}	0.138462	0.984848	TRUE	FALSE	FALSE	0.240429	65	0	9	56	A	missense_variant	MODERATE	rsd-2	WBGene00004681	transcript	F52G2.2a	protein_coding
IV	13529554	T	[G]	{G, T}	0.0153846	0.984848	TRUE	FALSE	FALSE	0.0305307	65	0	1	64	G	missense_variant	MODERATE	rsd-2	WBGene00004681	transcript	F52G2.2a	protein_coding
IV	13529645	T	[C]	{C, T}	0.153846	0.984848	TRUE	FALSE	TRUE	0.262373	65	0	10	55	C	missense_variant	MODERATE	rsd-2	WBGene00004681	transcript	F52G2.2a	protein_coding
IV	13529646	C	[T]	{C, T}	0.153846	0.984848	TRUE	FALSE	TRUE	0.262373	65	0	10	55	T	missense_variant	MODERATE	rsd-2	WBGene00004681	transcript	F52G2.2a	protein_coding
IV	13529712	T	[C]	{C, T}	0.215385	0.984848	TRUE	FALSE	TRUE	0.340608	65	0	14	51	C	missense_variant	MODERATE	rsd-2	WBGene00004681	transcript	F52G2.2a	protein_coding
IV	13529756	G	[C]	{C, G}	0.0769231	0.984848	TRUE	FALSE	FALSE	0.143113	65	0	5	60	C	missense_variant	MODERATE	rsd-2	WBGene00004681	transcript	F52G2.2a	protein_coding
IV	13530731	T	[C]	{C, T}	0.0461538	0.984848	TRUE	FALSE	TRUE	0.0887299	65	0	3	62	C	missense_variant	MODERATE	rsd-2	WBGene00004681	transcript	F52G2.2a	protein_coding
IV	13531037	G	[T]	{G, T}	0.0153846	0.984848	TRUE	FALSE	FALSE	0.0305307	65	0	1	64	T	missense_variant	MODERATE	rsd-2	WBGene00004681	transcript	F52G2.2a	protein_coding
IV	13531685	A	[G]	{G, A}	0.415385	0.984848	TRUE	FALSE	TRUE	0.489445	65	0	27	38	G	missense_variant	MODERATE	rsd-2	WBGene00004681	transcript	F52G2.2a	protein_coding
IV	13531789	C	[A]	{C, A}	0.0153846	0.984848	TRUE	FALSE	FALSE	0.0305307	65	0	1	64	A	missense_variant	MODERATE	rsd-2	WBGene00004681	transcript	F52G2.2a	protein_coding
IV	13532346	C	[T]	{C, T}	0.0153846	0.984848	TRUE	FALSE	TRUE	0.0305307	65	0	1	64	T	missense_variant	MODERATE	rsd-2	WBGene00004681	transcript	F52G2.2a	protein_coding
IV	13532487	C	[T]	{C, T}	0.0153846	0.984848	TRUE	FALSE	TRUE	0.0305307	65	0	1	64	T	missense_variant	MODERATE	rsd-2	WBGene00004681	transcript	F52G2.2a	protein_coding
IV	13532523	T	[C]	{C, T}	0.0153846	0.984848	TRUE	FALSE	TRUE	0.0305307	65	0	1	64	C	missense_variant	MODERATE	rsd-2	WBGene00004681	transcript	F52G2.2a	protein_coding
IV	13532574	T	[G]	{G, T}	0.0153846	0.984848	TRUE	FALSE	FALSE	0.0305307	65	0	1	64	G	missense_variant	MODERATE	rsd-2	WBGene00004681	transcript	F52G2.2a	protein_coding
IV	13532644	G	[T]	{G, T}	0.0153846	0.984848	TRUE	FALSE	FALSE	0.0305307	65	0	1	64	T	missense_variant	MODERATE	rsd-2	WBGene00004681	transcript	F52G2.2a	protein_coding
IV	13532814	T	[A]	{A, T}	0.0461538	0.984848	TRUE	FALSE	FALSE	0.0887299	65	0	3	62	A	missense_variant&splice_region_variant	MODERATE	rsd-2	WBGene00004681	transcript	F52G2.2a	protein_coding
IV	13534309	G	[T]	{G, T}	0.0153846	0.984848	TRUE	FALSE	FALSE	0.0305307	65	0	1	64	T	missense_variant	MODERATE	rsd-2	WBGene00004681	transcript	F52G2.2a	protein_coding
IV	13534421	C	[T]	{C, T}	0.169231	0.984848	TRUE	FALSE	TRUE	0.283363	65	0	11	54	T	missense_variant	MODERATE	rsd-2	WBGene00004681	transcript	F52G2.2a	protein_coding
IV	13534434	A	[C]	{C, A}	0.184615	0.984848	TRUE	FALSE	FALSE	0.303399	65	0	12	53	C	missense_variant	MODERATE	rsd-2	WBGene00004681	transcript	F52G2.2a	protein_coding
IV	13534446	T	[A]	{A, T}	0.0153846	0.984848	TRUE	FALSE	FALSE	0.0305307	65	0	1	64	A	missense_variant	MODERATE	rsd-2	WBGene00004681	transcript	F52G2.2a	protein_coding
IV	13534468	A	[G]	{G, A}	0.0153846	0.984848	TRUE	FALSE	TRUE	0.0305307	65	0	1	64	G	missense_variant	MODERATE	rsd-2	WBGene00004681	transcript	F52G2.2a	protein_coding
IV	13534487	C	[T]	{C, T}	0.0307692	0.984848	TRUE	FALSE	TRUE	0.0601073	65	0	2	63	T	missense_variant	MODERATE	rsd-2	WBGene00004681	transcript	F52G2.2a	protein_coding
IV	13534529	C	[T]	{C, T}	0.0153846	0.984848	TRUE	FALSE	TRUE	0.0305307	65	0	1	64	T	missense_variant	MODERATE	rsd-2	WBGene00004681	transcript	F52G2.2a	protein_coding
IV	13537460	G	[T]	{G, T}	0.0153846	0.984848	TRUE	FALSE	FALSE	0.0305307	65	0	1	64	T	missense_variant	MODERATE	rsd-2	WBGene00004681	transcript	F52G2.2a	protein_coding
IV	13538549	A	[G]	{G, A}	0.0153846	0.984848	TRUE	FALSE	TRUE	0.0305307	65	0	1	64	G	missense_variant	MODERATE	rsd-2	WBGene00004681	transcript	F52G2.2a	protein_coding
IV	13538621	T	[A]	{A, T}	0.215385	0.984848	TRUE	FALSE	FALSE	0.340608	65	0	14	51	A	missense_variant	MODERATE	rsd-2	WBGene00004681	transcript	F52G2.2a	protein_coding
IV	13538672	A	[G]	{G, A}	0.0153846	0.984848	TRUE	FALSE	TRUE	0.0305307	65	0	1	64	G	missense_variant&splice_region_variant	MODERATE	rsd-2	WBGene00004681	transcript	F52G2.2a	protein_coding
IV	13539206	A	[C]	{C, A}	0.0307692	0.984848	TRUE	FALSE	FALSE	0.0601073	65	0	2	63	C	missense_variant	MODERATE	rsd-2	WBGene00004681	transcript	F52G2.2a	protein_coding
IV	13539221	C	[A]	{C, A}	0.0461538	0.984848	TRUE	FALSE	FALSE	0.0887299	65	0	3	62	A	missense_variant	MODERATE	rsd-2	WBGene00004681	transcript	F52G2.2a	protein_coding
IV	13539242	G	[T]	{G, T}	0.0153846	0.984848	TRUE	FALSE	FALSE	0.0305307	65	0	1	64	T	missense_variant	MODERATE	rsd-2	WBGene00004681	transcript	F52G2.2a	protein_coding
IV	13539253	A	[G, T]	{G, A, T}	0.0769231	0.984848	TRUE	FALSE	FALSE	0.143113	65	0	5	60	G	missense_variant	MODERATE	rsd-2	WBGene00004681	transcript	F52G2.2a	protein_coding
IV	13539255	T	[A]	{A, T}	0.0153846	0.984848	TRUE	FALSE	FALSE	0.0305307	65	0	1	64	A	missense_variant	MODERATE	rsd-2	WBGene00004681	transcript	F52G2.2a	protein_coding
IV	13539284	A	[C]	{C, A}	0.0153846	0.984848	TRUE	FALSE	FALSE	0.0305307	65	0	1	64	C	missense_variant	MODERATE	rsd-2	WBGene00004681	transcript	F52G2.2a	protein_coding
IV	13539376	T	[A]	{A, T}	0.0153846	0.984848	TRUE	FALSE	FALSE	0.0305307	65	0	1	64	A	missense_variant	MODERATE	rsd-2	WBGene00004681	transcript	F52G2.2a	protein_coding
IV	13539393	C	[T]	{C, T}	0.0153846	0.984848	TRUE	FALSE	TRUE	0.0305307	65	0	1	64	T	missense_variant	MODERATE	rsd-2	WBGene00004681	transcript	F52G2.2a	protein_coding
IV	13539502	GTAA	[G]	{GTAA, G}	0.0153846	0.984848	FALSE	TRUE	FALSE	0.0305307	65	0	1	64	G	disruptive_inframe_deletion	MODERATE	rsd-2	WBGene00004681	transcript	F52G2.2a	protein_coding
IV	13539515	T	[A]	{A, T}	0.0153846	0.984848	TRUE	FALSE	FALSE	0.0305307	65	0	1	64	A	missense_variant	MODERATE	rsd-2	WBGene00004681	transcript	F52G2.2a	protein_coding
IV	13539539	A	[G]	{G, A}	0.0153846	0.984848	TRUE	FALSE	TRUE	0.0305307	65	0	1	64	G	missense_variant	MODERATE	rsd-2	WBGene00004681	transcript	F52G2.2a	protein_coding
IV	13539543	C	[T]	{C, T}	0.0153846	0.984848	TRUE	FALSE	TRUE	0.0305307	65	0	1	64	T	missense_variant	MODERATE	rsd-2	WBGene00004681	transcript	F52G2.2a	protein_coding
IV	13539572	G	[C]	{C, G}	0.0153846	0.984848	TRUE	FALSE	FALSE	0.0305307	65	0	1	64	C	missense_variant	MODERATE	rsd-2	WBGene00004681	transcript	F52G2.2a	protein_coding
IV	13539593	T	[G]	{G, T}	0.0153846	0.984848	TRUE	FALSE	FALSE	0.0305307	65	0	1	64	G	missense_variant	MODERATE	rsd-2	WBGene00004681	transcript	F52G2.2a	protein_coding
IV	13539611	GTCA	[G]	{G, GTCA}	0.0153846	0.984848	FALSE	TRUE	FALSE	0.0305307	65	0	1	64	G	disruptive_inframe_deletion	MODERATE	rsd-2	WBGene00004681	transcript	F52G2.2a	protein_coding
IV	13540190	G	[A]	{G, A}	0.0153846	0.984848	TRUE	FALSE	TRUE	0.0305307	65	0	1	64	A	missense_variant	MODERATE	rsd-2	WBGene00004681	transcript	F52G2.2a	protein_coding
IV	13540202	T	[C]	{C, T}	0.0461538	0.984848	TRUE	FALSE	TRUE	0.0887299	65	0	3	62	C	missense_variant	MODERATE	rsd-2	WBGene00004681	transcript	F52G2.2a	protein_coding
IV	13540214	A	[T]	{A, T}	0.0153846	0.984848	TRUE	FALSE	FALSE	0.0305307	65	0	1	64	T	missense_variant	MODERATE	rsd-2	WBGene00004681	transcript	F52G2.2a	protein_coding
IV	13540247	G	[T]	{G, T}	0.0153846	0.984848	TRUE	FALSE	FALSE	0.0305307	65	0	1	64	T	missense_variant	MODERATE	rsd-2	WBGene00004681	transcript	F52G2.2a	protein_coding
IV	13540256	A	[T]	{A, T}	0.0307692	0.984848	TRUE	FALSE	FALSE	0.0601073	65	0	2	63	T	missense_variant	MODERATE	rsd-2	WBGene00004681	transcript	F52G2.2a	protein_coding
IV	13543470	G	[A]	{G, A}	0.030303	1	TRUE	FALSE	TRUE	0.0592181	66	0	2	64	A	missense_variant	MODERATE	F52G2.3	WBGene00009943	transcript	F52G2.3	protein_coding
IV	13543498	C	[T]	{C, T}	0.030303	1	TRUE	FALSE	TRUE	0.0592181	66	0	2	64	T	missense_variant	MODERATE	F52G2.3	WBGene00009943	transcript	F52G2.3	protein_coding
IV	13543657	A	[T]	{A, T}	0.0151515	1	TRUE	FALSE	FALSE	0.0300717	66	0	1	65	T	missense_variant	MODERATE	F52G2.3	WBGene00009943	transcript	F52G2.3	protein_coding
IV	13543666	G	[A]	{G, A}	0.0151515	1	TRUE	FALSE	TRUE	0.0300717	66	0	1	65	A	missense_variant	MODERATE	F52G2.3	WBGene00009943	transcript	F52G2.3	protein_coding
IV	13543677	G	[A]	{G, A}	0.0454545	1	TRUE	FALSE	TRUE	0.0874393	66	0	3	63	A	missense_variant	MODERATE	F52G2.3	WBGene00009943	transcript	F52G2.3	protein_coding
IV	13545012	G	[C]	{C, G}	0.0757576	1	TRUE	FALSE	FALSE	0.141106	66	0	5	61	C	missense_variant	MODERATE	F52G2.3	WBGene00009943	transcript	F52G2.3	protein_coding
IV	13545013	T	[C]	{C, T}	0.0151515	1	TRUE	FALSE	TRUE	0.0300717	66	0	1	65	C	missense_variant	MODERATE	F52G2.3	WBGene00009943	transcript	F52G2.3	protein_coding
IV	13545017	A	[T]	{A, T}	0.0606061	1	TRUE	FALSE	FALSE	0.114735	66	0	4	62	T	missense_variant	MODERATE	F52G2.3	WBGene00009943	transcript	F52G2.3	protein_coding
IV	13545029	C	[T]	{C, T}	0.151515	1	TRUE	FALSE	TRUE	0.259079	66	0	10	56	T	missense_variant	MODERATE	F52G2.3	WBGene00009943	transcript	F52G2.3	protein_coding
IV	13545612	C	[T]	{C, T}	0.0151515	1	TRUE	FALSE	TRUE	0.0300717	66	0	1	65	T	missense_variant	MODERATE	F52G2.3	WBGene00009943	transcript	F52G2.3	protein_coding
IV	13545827	T	[C]	{C, T}	0.409091	1	TRUE	FALSE	TRUE	0.487162	66	0	27	39	C	missense_variant	MODERATE	F52G2.3	WBGene00009943	transcript	F52G2.3	protein_coding
IV	13545913	C	[T]	{C, T}	0.030303	1	TRUE	FALSE	TRUE	0.0592181	66	0	2	64	T	missense_variant	MODERATE	F52G2.3	WBGene00009943	transcript	F52G2.3	protein_coding
IV	13546065	T	[A]	{A, T}	0.0151515	1	TRUE	FALSE	FALSE	0.0300717	66	0	1	65	A	missense_variant	MODERATE	F52G2.3	WBGene00009943	transcript	F52G2.3	protein_coding
IV	13546080	C	[T]	{C, T}	0.0151515	1	TRUE	FALSE	TRUE	0.0300717	66	0	1	65	T	missense_variant	MODERATE	F52G2.3	WBGene00009943	transcript	F52G2.3	protein_coding
IV	13546102	T	[C]	{C, T}	0.030303	1	TRUE	FALSE	TRUE	0.0592181	66	0	2	64	C	missense_variant	MODERATE	F52G2.3	WBGene00009943	transcript	F52G2.3	protein_coding
IV	13546152	C	[T]	{C, T}	0.0151515	1	TRUE	FALSE	TRUE	0.0300717	66	0	1	65	T	missense_variant	MODERATE	F52G2.3	WBGene00009943	transcript	F52G2.3	protein_coding
IV	13546155	C	[G]	{C, G}	0.0454545	1	TRUE	FALSE	FALSE	0.0874393	66	0	3	63	G	missense_variant	MODERATE	F52G2.3	WBGene00009943	transcript	F52G2.3	protein_coding
IV	13546506	T	[A]	{A, T}	0.0153846	0.984848	TRUE	FALSE	FALSE	0.0305307	65	0	1	64	A	missense_variant	MODERATE	F52G2.3	WBGene00009943	transcript	F52G2.3	protein_coding
IV	13546568	A	[G]	{G, A}	0.0153846	0.984848	TRUE	FALSE	TRUE	0.0305307	65	0	1	64	G	missense_variant	MODERATE	F52G2.3	WBGene00009943	transcript	F52G2.3	protein_coding
IV	13546573	A	[G]	{G, A}	0.0153846	0.984848	TRUE	FALSE	TRUE	0.0305307	65	0	1	64	G	missense_variant	MODERATE	F52G2.3	WBGene00009943	transcript	F52G2.3	protein_coding
IV	13546598	T	[C]	{C, T}	0.0153846	0.984848	TRUE	FALSE	TRUE	0.0305307	65	0	1	64	C	missense_variant	MODERATE	F52G2.3	WBGene00009943	transcript	F52G2.3	protein_coding
IV	13546603	C	[T]	{C, T}	0.0153846	0.984848	TRUE	FALSE	TRUE	0.0305307	65	0	1	64	T	missense_variant	MODERATE	F52G2.3	WBGene00009943	transcript	F52G2.3	protein_coding
IV	13547182	T	[G]	{G, T}	0.0606061	1	TRUE	FALSE	FALSE	0.114735	66	0	4	62	G	missense_variant	MODERATE	F52G2.3	WBGene00009943	transcript	F52G2.3	protein_coding
IV	13547185	A	[G]	{G, A}	0.0151515	1	TRUE	FALSE	TRUE	0.0300717	66	0	1	65	G	missense_variant	MODERATE	F52G2.3	WBGene00009943	transcript	F52G2.3	protein_coding
IV	13547187	A	[T]	{A, T}	0.0151515	1	TRUE	FALSE	FALSE	0.0300717	66	0	1	65	T	missense_variant	MODERATE	F52G2.3	WBGene00009943	transcript	F52G2.3	protein_coding
IV	13547199	T	[G]	{G, T}	0.0151515	1	TRUE	FALSE	FALSE	0.0300717	66	0	1	65	G	missense_variant	MODERATE	F52G2.3	WBGene00009943	transcript	F52G2.3	protein_coding
IV	13547231	C	[A]	{C, A}	0.030303	1	TRUE	FALSE	FALSE	0.0592181	66	0	2	64	A	missense_variant	MODERATE	F52G2.3	WBGene00009943	transcript	F52G2.3	protein_coding
IV	13547291	C	[T]	{C, T}	0.0151515	1	TRUE	FALSE	TRUE	0.0300717	66	0	1	65	T	missense_variant	MODERATE	F52G2.3	WBGene00009943	transcript	F52G2.3	protein_coding
IV	13547303	T	[C]	{C, T}	0.363636	1	TRUE	FALSE	TRUE	0.466343	66	0	24	42	C	missense_variant	MODERATE	F52G2.3	WBGene00009943	transcript	F52G2.3	protein_coding
IV	13547389	A	[C]	{C, A}	0.0153846	0.984848	TRUE	FALSE	FALSE	0.0305307	65	0	1	64	C	missense_variant	MODERATE	F52G2.3	WBGene00009943	transcript	F52G2.3	protein_coding
IV	13547398	A	[T]	{A, T}	0.0153846	0.984848	TRUE	FALSE	FALSE	0.0305307	65	0	1	64	T	missense_variant	MODERATE	F52G2.3	WBGene00009943	transcript	F52G2.3	protein_coding
IV	13547405	T	[G]	{G, T}	0.0151515	1	TRUE	FALSE	FALSE	0.0300717	66	0	1	65	G	missense_variant	MODERATE	F52G2.3	WBGene00009943	transcript	F52G2.3	protein_coding
IV	13547406	G	[C]	{C, G}	0.166667	1	TRUE	FALSE	FALSE	0.279898	66	0	11	55	C	missense_variant	MODERATE	F52G2.3	WBGene00009943	transcript	F52G2.3	protein_coding
IV	13547414	C	[G]	{C, G}	0.0151515	1	TRUE	FALSE	FALSE	0.0300717	66	0	1	65	G	missense_variant	MODERATE	F52G2.3	WBGene00009943	transcript	F52G2.3	protein_coding
IV	13547539	T	[C]	{C, T}	0.181818	1	TRUE	FALSE	TRUE	0.299792	66	0	12	54	C	missense_variant	MODERATE	F52G2.3	WBGene00009943	transcript	F52G2.3	protein_coding
IV	13547551	A	[C]	{C, A}	0.0151515	1	TRUE	FALSE	FALSE	0.0300717	66	0	1	65	C	missense_variant	MODERATE	F52G2.3	WBGene00009943	transcript	F52G2.3	protein_coding
IV	13547570	C	[T]	{C, T}	0.409091	1	TRUE	FALSE	TRUE	0.487162	66	0	27	39	T	missense_variant	MODERATE	F52G2.3	WBGene00009943	transcript	F52G2.3	protein_coding
IV	13547573	G	[A]	{G, A}	0.0151515	1	TRUE	FALSE	TRUE	0.0300717	66	0	1	65	A	missense_variant	MODERATE	F52G2.3	WBGene00009943	transcript	F52G2.3	protein_coding
IV	13547576	G	[A]	{G, A}	0.227273	1	TRUE	FALSE	TRUE	0.353921	66	0	15	51	A	missense_variant	MODERATE	F52G2.3	WBGene00009943	transcript	F52G2.3	protein_coding
IV	13547585	C	[G]	{C, G}	0.212121	1	TRUE	FALSE	FALSE	0.336803	66	0	14	52	G	missense_variant	MODERATE	F52G2.3	WBGene00009943	transcript	F52G2.3	protein_coding
IV	13547591	T	[A]	{A, T}	0.181818	1	TRUE	FALSE	FALSE	0.299792	66	0	12	54	A	missense_variant	MODERATE	F52G2.3	WBGene00009943	transcript	F52G2.3	protein_coding
IV	13547594	C	[T]	{C, T}	0.030303	1	TRUE	FALSE	TRUE	0.0592181	66	0	2	64	T	missense_variant	MODERATE	F52G2.3	WBGene00009943	transcript	F52G2.3	protein_coding
IV	13547613	G	[C]	{C, G}	0.030303	1	TRUE	FALSE	FALSE	0.0592181	66	0	2	64	C	missense_variant	MODERATE	F52G2.3	WBGene00009943	transcript	F52G2.3	protein_coding
IV	13547626	A	[G]	{G, A}	0.0606061	1	TRUE	FALSE	TRUE	0.114735	66	0	4	62	G	missense_variant	MODERATE	F52G2.3	WBGene00009943	transcript	F52G2.3	protein_coding
IV	13547629	T	[G]	{G, T}	0.0454545	1	TRUE	FALSE	FALSE	0.0874393	66	0	3	63	G	missense_variant	MODERATE	F52G2.3	WBGene00009943	transcript	F52G2.3	protein_coding
IV	13547630	G	[T]	{G, T}	0.19697	1	TRUE	FALSE	FALSE	0.31876	66	0	13	53	T	missense_variant	MODERATE	F52G2.3	WBGene00009943	transcript	F52G2.3	protein_coding
IV	13547653	G	[A]	{G, A}	0.409091	1	TRUE	FALSE	TRUE	0.487162	66	0	27	39	A	missense_variant	MODERATE	F52G2.3	WBGene00009943	transcript	F52G2.3	protein_coding
IV	13547660	A	[T]	{A, T}	0.19697	1	TRUE	FALSE	FALSE	0.31876	66	0	13	53	T	missense_variant	MODERATE	F52G2.3	WBGene00009943	transcript	F52G2.3	protein_coding
IV	13547661	T	[G]	{G, T}	0.19697	1	TRUE	FALSE	FALSE	0.31876	66	0	13	53	G	missense_variant	MODERATE	F52G2.3	WBGene00009943	transcript	F52G2.3	protein_coding
IV	13547671	T	[G]	{G, T}	0.0327869	0.924242	TRUE	FALSE	FALSE	0.063948	61	0	2	59	G	missense_variant	MODERATE	F52G2.3	WBGene00009943	transcript	F52G2.3	protein_coding
IV	13548117	C	[A]	{C, A}	0.212121	1	TRUE	FALSE	FALSE	0.336803	66	0	14	52	A	missense_variant	MODERATE	F52G2.3	WBGene00009943	transcript	F52G2.3	protein_coding
IV	13548124	CACA	[C]	{C, CACA}	0.19697	1	FALSE	TRUE	FALSE	0.31876	66	0	13	53	C	disruptive_inframe_deletion	MODERATE	F52G2.3	WBGene00009943	transcript	F52G2.3	protein_coding
IV	13548182	T	[A]	{A, T}	0.166667	1	TRUE	FALSE	FALSE	0.279898	66	0	11	55	A	missense_variant	MODERATE	F52G2.3	WBGene00009943	transcript	F52G2.3	protein_coding
IV	13548210	G	[A]	{G, A}	0.0151515	1	TRUE	FALSE	TRUE	0.0300717	66	0	1	65	A	missense_variant	MODERATE	F52G2.3	WBGene00009943	transcript	F52G2.3	protein_coding
IV	13548215	G	[A]	{G, A}	0.409091	1	TRUE	FALSE	TRUE	0.487162	66	0	27	39	A	missense_variant	MODERATE	F52G2.3	WBGene00009943	transcript	F52G2.3	protein_coding
IV	13549770	TGCG	[T]	{TGCG, T}	0.030303	1	FALSE	TRUE	FALSE	0.0592181	66	0	2	64	T	conservative_inframe_deletion	MODERATE	Y45F10B.13	WBGene00012875	transcript	Y45F10B.13a	protein_coding
IV	13549942	G	[A]	{G, A}	0.030303	1	TRUE	FALSE	TRUE	0.0592181	66	0	2	64	A	missense_variant	MODERATE	Y45F10B.13	WBGene00012875	transcript	Y45F10B.13a	protein_coding
IV	13549974	C	[A]	{C, A}	0.0151515	1	TRUE	FALSE	FALSE	0.0300717	66	0	1	65	A	missense_variant	MODERATE	Y45F10B.13	WBGene00012875	transcript	Y45F10B.13a	protein_coding
IV	13549984	G	[C]	{C, G}	0.0454545	1	TRUE	FALSE	FALSE	0.0874393	66	0	3	63	C	missense_variant	MODERATE	Y45F10B.13	WBGene00012875	transcript	Y45F10B.13a	protein_coding
IV	13550812	C	[T]	{C, T}	0.030303	1	TRUE	FALSE	TRUE	0.0592181	66	0	2	64	T	missense_variant	MODERATE	Y45F10B.13	WBGene00012875	transcript	Y45F10B.13a	protein_coding
IV	13550822	C	[T]	{C, T}	0.0151515	1	TRUE	FALSE	TRUE	0.0300717	66	0	1	65	T	missense_variant	MODERATE	Y45F10B.13	WBGene00012875	transcript	Y45F10B.13a	protein_coding
IV	13550825	C	[A]	{C, A}	0.0909091	1	TRUE	FALSE	FALSE	0.166551	66	0	6	60	A	missense_variant	MODERATE	Y45F10B.13	WBGene00012875	transcript	Y45F10B.13a	protein_coding
IV	13557413	G	[A]	{G, A}	0.0322581	0.939394	TRUE	FALSE	TRUE	0.0629426	62	0	2	60	A	missense_variant	MODERATE	Y45F10B.13	WBGene00012875	transcript	Y45F10B.13a	protein_coding
IV	13559452	A	[T]	{A, T}	0.016129	0.939394	TRUE	FALSE	FALSE	0.0319958	62	0	1	61	T	missense_variant	MODERATE	Y45F10B.13	WBGene00012875	transcript	Y45F10B.13a	protein_coding
IV	13559754	T	[TTTG]	{TTTG, T}	0.016129	0.939394	FALSE	TRUE	FALSE	0.0319958	62	0	1	61	TTTG	disruptive_inframe_insertion	MODERATE	Y45F10B.13	WBGene00012875	transcript	Y45F10B.13a	protein_coding
IV	13559758	T	[TTGG]	{TTGG, T}	0.016129	0.939394	FALSE	TRUE	FALSE	0.0319958	62	0	1	61	TTGG	conservative_inframe_insertion	MODERATE	Y45F10B.13	WBGene00012875	transcript	Y45F10B.13a	protein_coding
IV	13559821	A	[G]	{G, A}	0.016129	0.939394	TRUE	FALSE	TRUE	0.0319958	62	0	1	61	G	missense_variant	MODERATE	Y45F10B.13	WBGene00012875	transcript	Y45F10B.13a	protein_coding
IV	13559913	T	[A]	{A, T}	0.016129	0.939394	TRUE	FALSE	FALSE	0.0319958	62	0	1	61	A	missense_variant	MODERATE	Y45F10B.13	WBGene00012875	transcript	Y45F10B.13a	protein_coding
IV	13559914	T	[C]	{C, T}	0.0483871	0.939394	TRUE	FALSE	TRUE	0.0928403	62	0	3	59	C	missense_variant	MODERATE	Y45F10B.13	WBGene00012875	transcript	Y45F10B.13a	protein_coding
IV	13559943	G	[T]	{G, T}	0.016129	0.939394	TRUE	FALSE	FALSE	0.0319958	62	0	1	61	T	missense_variant	MODERATE	Y45F10B.13	WBGene00012875	transcript	Y45F10B.13a	protein_coding
IV	13560115	T	[C]	{C, T}	0.016129	0.939394	TRUE	FALSE	TRUE	0.0319958	62	0	1	61	C	missense_variant	MODERATE	Y45F10B.13	WBGene00012875	transcript	Y45F10B.13a	protein_coding
IV	13560160	T	[C]	{C, T}	0.016129	0.939394	TRUE	FALSE	TRUE	0.0319958	62	0	1	61	C	missense_variant	MODERATE	Y45F10B.13	WBGene00012875	transcript	Y45F10B.13a	protein_coding
IV	13566210	G	[A]	{G, A}	0.016129	0.939394	TRUE	FALSE	TRUE	0.0319958	62	0	1	61	A	missense_variant	MODERATE	qui-1	WBGene00004265	transcript	Y45F10B.10a	protein_coding
IV	13566633	C	[A]	{C, A}	0.0483871	0.939394	TRUE	FALSE	FALSE	0.0928403	62	0	3	59	A	missense_variant	MODERATE	qui-1	WBGene00004265	transcript	Y45F10B.10a	protein_coding
IV	13567147	A	[T]	{A, T}	0.0322581	0.939394	TRUE	FALSE	FALSE	0.0629426	62	0	2	60	T	missense_variant	MODERATE	qui-1	WBGene00004265	transcript	Y45F10B.10a	protein_coding
IV	13568760	A	[G]	{G, A}	0.0491803	0.924242	TRUE	FALSE	TRUE	0.0942962	61	0	3	58	G	missense_variant	MODERATE	qui-1	WBGene00004265	transcript	Y45F10B.10a	protein_coding
IV	13570654	A	[T]	{A, T}	0.0483871	0.939394	TRUE	FALSE	FALSE	0.0928403	62	0	3	59	T	missense_variant	MODERATE	qui-1	WBGene00004265	transcript	Y45F10B.10a	protein_coding
IV	13575302	A	[T]	{A, T}	0.015873	0.954545	TRUE	FALSE	FALSE	0.0314921	63	0	1	62	T	missense_variant	MODERATE	srd-10	WBGene00005088	transcript	Y45F10B.14	protein_coding
IV	13576215	G	[A]	{G, A}	0.047619	0.954545	TRUE	FALSE	TRUE	0.0914286	63	0	3	60	A	missense_variant	MODERATE	srd-10	WBGene00005088	transcript	Y45F10B.14	protein_coding
IV	13576373	A	[T]	{A, T}	0.031746	0.954545	TRUE	FALSE	FALSE	0.0619683	63	0	2	61	T	missense_variant&splice_region_variant	MODERATE	srd-10	WBGene00005088	transcript	Y45F10B.14	protein_coding
IV	13576534	G	[A]	{G, A}	0.047619	0.954545	TRUE	FALSE	TRUE	0.0914286	63	0	3	60	A	missense_variant	MODERATE	srd-10	WBGene00005088	transcript	Y45F10B.14	protein_coding
IV	13576545	G	[T]	{G, T}	0.015873	0.954545	TRUE	FALSE	FALSE	0.0314921	63	0	1	62	T	missense_variant	MODERATE	srd-10	WBGene00005088	transcript	Y45F10B.14	protein_coding
IV	13576665	A	[T]	{A, T}	0.047619	0.954545	TRUE	FALSE	FALSE	0.0914286	63	0	3	60	T	missense_variant	MODERATE	srd-10	WBGene00005088	transcript	Y45F10B.14	protein_coding
IV	13576666	A	[G]	{G, A}	0.238095	0.954545	TRUE	FALSE	TRUE	0.365714	63	0	15	48	G	missense_variant	MODERATE	srd-10	WBGene00005088	transcript	Y45F10B.14	protein_coding
IV	13577881	C	[T]	{C, T}	0.0887097	0.939394	TRUE	FALSE	TRUE	0.162995	62	1	5	56	T	missense_variant	MODERATE	Y45F10B.8	WBGene00012872	transcript	Y45F10B.8	protein_coding
IV	13580441	A	[T]	{A, T}	0.03125	0.969697	TRUE	FALSE	FALSE	0.0610236	64	0	2	62	T	missense_variant	MODERATE	sru-16	WBGene00005679	transcript	Y45F10B.4.1	protein_coding
IV	13580853	A	[T]	{A, T}	0.047619	0.954545	TRUE	FALSE	FALSE	0.0914286	63	0	3	60	T	missense_variant	MODERATE	sru-16	WBGene00005679	transcript	Y45F10B.4.1	protein_coding
IV	13580854	T	[C]	{C, T}	0.015873	0.954545	TRUE	FALSE	TRUE	0.0314921	63	0	1	62	C	missense_variant	MODERATE	sru-16	WBGene00005679	transcript	Y45F10B.4.1	protein_coding
IV	13581120	A	[T]	{A, T}	0.0634921	0.954545	TRUE	FALSE	FALSE	0.119873	63	0	4	59	T	missense_variant	MODERATE	sru-16	WBGene00005679	transcript	Y45F10B.4.1	protein_coding
IV	13581125	C	[G]	{C, G}	0.015873	0.954545	TRUE	FALSE	FALSE	0.0314921	63	0	1	62	G	missense_variant	MODERATE	sru-16	WBGene00005679	transcript	Y45F10B.4.1	protein_coding
IV	13582053	G	[T]	{G, T}	0.03125	0.969697	TRUE	FALSE	FALSE	0.0610236	64	0	2	62	T	missense_variant	MODERATE	sru-16	WBGene00005679	transcript	Y45F10B.4.1	protein_coding
IV	13582067	T	[A]	{A, T}	0.203125	0.969697	TRUE	FALSE	FALSE	0.32628	64	0	13	51	A	missense_variant	MODERATE	sru-16	WBGene00005679	transcript	Y45F10B.4.1	protein_coding
IV	13582068	T	[A]	{A, T}	0.046875	0.969697	TRUE	FALSE	FALSE	0.0900591	64	0	3	61	A	missense_variant	MODERATE	sru-16	WBGene00005679	transcript	Y45F10B.4.1	protein_coding
IV	13583233	G	[A]	{G, A}	0.03125	0.969697	TRUE	FALSE	TRUE	0.0610236	64	0	2	62	A	missense_variant	MODERATE	sru-12	WBGene00005675	transcript	Y45F10B.5	protein_coding
IV	13583234	A	[G]	{G, A}	0.015625	0.969697	TRUE	FALSE	TRUE	0.0310039	64	0	1	63	G	missense_variant	MODERATE	sru-12	WBGene00005675	transcript	Y45F10B.5	protein_coding
IV	13583248	G	[C]	{C, G}	0.03125	0.969697	TRUE	FALSE	FALSE	0.0610236	64	0	2	62	C	missense_variant	MODERATE	sru-12	WBGene00005675	transcript	Y45F10B.5	protein_coding
IV	13583428	G	[A]	{G, A}	0.046875	0.969697	TRUE	FALSE	TRUE	0.0900591	64	0	3	61	A	missense_variant	MODERATE	sru-12	WBGene00005675	transcript	Y45F10B.5	protein_coding
IV	13583858	C	[T]	{C, T}	0.03125	0.969697	TRUE	FALSE	TRUE	0.0610236	64	0	2	62	T	missense_variant	MODERATE	sru-12	WBGene00005675	transcript	Y45F10B.5	protein_coding
IV	13583864	C	[T]	{C, T}	0.210938	0.969697	TRUE	FALSE	TRUE	0.335507	64	1	13	50	T	missense_variant	MODERATE	sru-12	WBGene00005675	transcript	Y45F10B.5	protein_coding
IV	13583885	T	[C]	{C, T}	0.046875	0.969697	TRUE	FALSE	TRUE	0.0900591	64	0	3	61	C	missense_variant	MODERATE	sru-12	WBGene00005675	transcript	Y45F10B.5	protein_coding
IV	13584217	G	[A]	{G, A}	0.0234375	0.969697	TRUE	FALSE	TRUE	0.0461368	64	1	1	62	A	missense_variant	MODERATE	sru-12	WBGene00005675	transcript	Y45F10B.5	protein_coding
IV	13584396	T	[A]	{A, T}	0.21875	0.969697	TRUE	FALSE	FALSE	0.344488	64	2	13	49	A	missense_variant	MODERATE	sru-12	WBGene00005675	transcript	Y45F10B.5	protein_coding
IV	13584397	T	[G, C]	{G, T}	0.03125	0.969697	TRUE	FALSE	FALSE	0.0610236	64	0	2	62	C	missense_variant	MODERATE	sru-12	WBGene00005675	transcript	Y45F10B.5	protein_coding
IV	13584977	G	[A]	{G, A}	0.015625	0.969697	TRUE	FALSE	TRUE	0.0310039	64	0	1	63	A	missense_variant	MODERATE	sru-11	WBGene00005674	transcript	Y45F10B.6	protein_coding
IV	13585046	T	[A]	{A, T}	0.015625	0.969697	TRUE	FALSE	FALSE	0.0310039	64	0	1	63	A	missense_variant	MODERATE	sru-11	WBGene00005674	transcript	Y45F10B.6	protein_coding
IV	13585463	C	[A]	{C, A}	0.015625	0.969697	TRUE	FALSE	FALSE	0.0310039	64	0	1	63	A	missense_variant	MODERATE	sru-11	WBGene00005674	transcript	Y45F10B.6	protein_coding
IV	13585493	G	[T]	{G, T}	0.0625	0.969697	TRUE	FALSE	FALSE	0.11811	64	0	4	60	T	missense_variant	MODERATE	sru-11	WBGene00005674	transcript	Y45F10B.6	protein_coding
IV	13585527	C	[T]	{C, T}	0.304688	0.969697	TRUE	FALSE	TRUE	0.427042	64	1	19	44	T	missense_variant&splice_region_variant	MODERATE	sru-11	WBGene00005674	transcript	Y45F10B.6	protein_coding
IV	13587646	G	[A]	{G, A}	0.0530303	1	TRUE	FALSE	TRUE	0.101203	66	1	3	62	A	missense_variant	MODERATE	Y45F10B.12	WBGene00012874	transcript	Y45F10B.12	protein_coding
IV	13587961	T	[A]	{A, T}	0.0151515	1	TRUE	FALSE	FALSE	0.0300717	66	0	1	65	A	missense_variant	MODERATE	Y45F10B.12	WBGene00012874	transcript	Y45F10B.12	protein_coding
IV	13588033	A	[C]	{C, A}	0.0530303	1	TRUE	FALSE	FALSE	0.101203	66	1	3	62	C	missense_variant	MODERATE	Y45F10B.12	WBGene00012874	transcript	Y45F10B.12	protein_coding
IV	13588187	A	[G]	{G, A}	0.0454545	1	TRUE	FALSE	TRUE	0.0874393	66	0	3	63	G	missense_variant	MODERATE	Y45F10B.12	WBGene00012874	transcript	Y45F10B.12	protein_coding
IV	13589072	T	[C]	{C, T}	0.0454545	1	TRUE	FALSE	TRUE	0.0874393	66	0	3	63	C	missense_variant	MODERATE	sru-9	WBGene00005672	transcript	Y45F10B.11	protein_coding
IV	13589492	C	[T]	{C, T}	0.181818	1	TRUE	FALSE	TRUE	0.299792	66	0	12	54	T	missense_variant	MODERATE	sru-9	WBGene00005672	transcript	Y45F10B.11	protein_coding
IV	13589551	C	[T]	{C, T}	0.030303	1	TRUE	FALSE	TRUE	0.0592181	66	0	2	64	T	missense_variant	MODERATE	sru-9	WBGene00005672	transcript	Y45F10B.11	protein_coding
IV	13589560	G	[A]	{G, A}	0.030303	1	TRUE	FALSE	TRUE	0.0592181	66	0	2	64	A	missense_variant	MODERATE	sru-9	WBGene00005672	transcript	Y45F10B.11	protein_coding
IV	13589572	T	[C]	{C, T}	0.030303	1	TRUE	FALSE	TRUE	0.0592181	66	0	2	64	C	missense_variant	MODERATE	sru-9	WBGene00005672	transcript	Y45F10B.11	protein_coding
IV	13590713	A	[T]	{A, T}	0.0307692	0.984848	TRUE	FALSE	FALSE	0.0601073	65	0	2	63	T	missense_variant	MODERATE	tsp-5	WBGene00006631	transcript	Y45F10B.1	protein_coding
IV	13590714	A	[G]	{G, A}	0.0307692	0.984848	TRUE	FALSE	TRUE	0.0601073	65	0	2	63	G	missense_variant	MODERATE	tsp-5	WBGene00006631	transcript	Y45F10B.1	protein_coding
IV	13590783	C	[A]	{C, A}	0.0307692	0.984848	TRUE	FALSE	FALSE	0.0601073	65	0	2	63	A	missense_variant	MODERATE	tsp-5	WBGene00006631	transcript	Y45F10B.1	protein_coding
IV	13591364	G	[A]	{G, A}	0.0153846	0.984848	TRUE	FALSE	TRUE	0.0305307	65	0	1	64	A	missense_variant	MODERATE	tsp-5	WBGene00006631	transcript	Y45F10B.1	protein_coding
IV	13591394	G	[A]	{G, A}	0.0153846	0.984848	TRUE	FALSE	TRUE	0.0305307	65	0	1	64	A	missense_variant	MODERATE	tsp-5	WBGene00006631	transcript	Y45F10B.1	protein_coding
IV	13591433	C	[T]	{C, T}	0.0153846	0.984848	TRUE	FALSE	TRUE	0.0305307	65	0	1	64	T	missense_variant	MODERATE	tsp-5	WBGene00006631	transcript	Y45F10B.1	protein_coding
IV	13591521	A	[C]	{C, A}	0.384615	0.984848	TRUE	FALSE	FALSE	0.477042	65	0	25	40	C	missense_variant&splice_region_variant	MODERATE	tsp-5	WBGene00006631	transcript	Y45F10B.1	protein_coding
IV	13596978	C	[A]	{C, A}	0.030303	1	TRUE	FALSE	FALSE	0.0592181	66	0	2	64	A	missense_variant	MODERATE	Y45F10B.9	WBGene00012873	transcript	Y45F10B.9	protein_coding
IV	13603248	C	[G]	{C, G}	0.145161	0.939394	TRUE	FALSE	FALSE	0.250197	62	0	9	53	G	missense_variant	MODERATE	Y45F10B.59	WBGene00194917	transcript	Y45F10B.59	protein_coding
IV	13607626	A	[G]	{G, A}	0.393939	1	TRUE	FALSE	TRUE	0.481147	66	0	26	40	G	missense_variant	MODERATE	C08F11.13	WBGene00007460	transcript	C08F11.13a.1	protein_coding
IV	13607833	A	[G]	{G, A}	0.0151515	1	TRUE	FALSE	TRUE	0.0300717	66	0	1	65	G	missense_variant	MODERATE	C08F11.13	WBGene00007460	transcript	C08F11.13a.1	protein_coding
IV	13608079	C	[A]	{C, A}	0.0151515	1	TRUE	FALSE	FALSE	0.0300717	66	0	1	65	A	missense_variant	MODERATE	C08F11.13	WBGene00007460	transcript	C08F11.13a.1	protein_coding
IV	13608114	C	[T]	{C, T}	0.0454545	1	TRUE	FALSE	TRUE	0.0874393	66	0	3	63	T	missense_variant	MODERATE	C08F11.13	WBGene00007460	transcript	C08F11.13a.1	protein_coding
IV	13608192	A	[T]	{A, T}	0.454545	1	TRUE	FALSE	FALSE	0.499653	66	0	30	36	T	missense_variant	MODERATE	C08F11.13	WBGene00007460	transcript	C08F11.13a.1	protein_coding
IV	13609297	C	[G]	{C, G}	0.0151515	1	TRUE	FALSE	FALSE	0.0300717	66	0	1	65	G	missense_variant	MODERATE	C08F11.13	WBGene00007460	transcript	C08F11.13a.1	protein_coding
IV	13609770	C	[T]	{C, T}	0.0151515	1	TRUE	FALSE	TRUE	0.0300717	66	0	1	65	T	missense_variant	MODERATE	C08F11.13	WBGene00007460	transcript	C08F11.13a.1	protein_coding
IV	13620522	A	[G]	{G, A}	0.338462	0.984848	TRUE	FALSE	TRUE	0.451282	65	0	22	43	G	missense_variant	MODERATE	C08F11.3	WBGene00007452	transcript	C08F11.3	protein_coding
IV	13621177	T	[A]	{A, T}	0.0454545	1	TRUE	FALSE	FALSE	0.0874393	66	0	3	63	A	missense_variant	MODERATE	C08F11.3	WBGene00007452	transcript	C08F11.3	protein_coding
IV	13621319	A	[G]	{G, A}	0.0151515	1	TRUE	FALSE	TRUE	0.0300717	66	0	1	65	G	missense_variant	MODERATE	C08F11.3	WBGene00007452	transcript	C08F11.3	protein_coding
IV	13624127	T	[C]	{C, T}	0.0151515	1	TRUE	FALSE	TRUE	0.0300717	66	0	1	65	C	missense_variant	MODERATE	C08F11.1	WBGene00007450	transcript	C08F11.1	protein_coding
IV	13625003	A	[T]	{A, T}	0.0151515	1	TRUE	FALSE	FALSE	0.0300717	66	0	1	65	T	missense_variant&splice_region_variant	MODERATE	C08F11.1	WBGene00007450	transcript	C08F11.1	protein_coding
IV	13625101	C	[A]	{C, A}	0.0151515	1	TRUE	FALSE	FALSE	0.0300717	66	0	1	65	A	missense_variant	MODERATE	C08F11.1	WBGene00007450	transcript	C08F11.1	protein_coding
IV	13625136	G	[A]	{G, A}	0.0151515	1	TRUE	FALSE	TRUE	0.0300717	66	0	1	65	A	missense_variant	MODERATE	C08F11.1	WBGene00007450	transcript	C08F11.1	protein_coding
IV	13625287	C	[A]	{C, A}	0.0151515	1	TRUE	FALSE	FALSE	0.0300717	66	0	1	65	A	missense_variant	MODERATE	C08F11.1	WBGene00007450	transcript	C08F11.1	protein_coding
IV	13625373	G	[A]	{G, A}	0.030303	1	TRUE	FALSE	TRUE	0.0592181	66	0	2	64	A	missense_variant	MODERATE	C08F11.1	WBGene00007450	transcript	C08F11.1	protein_coding
IV	13626772	T	[C]	{C, T}	0.0151515	1	TRUE	FALSE	TRUE	0.0300717	66	0	1	65	C	missense_variant	MODERATE	sru-21	WBGene00005684	transcript	C08F11.4	protein_coding
IV	13626776	A	[T]	{A, T}	0.0151515	1	TRUE	FALSE	FALSE	0.0300717	66	0	1	65	T	missense_variant	MODERATE	sru-21	WBGene00005684	transcript	C08F11.4	protein_coding
IV	13626815	T	[A]	{A, T}	0.0454545	1	TRUE	FALSE	FALSE	0.0874393	66	0	3	63	A	missense_variant	MODERATE	sru-21	WBGene00005684	transcript	C08F11.4	protein_coding
IV	13626844	A	[T]	{A, T}	0.0151515	1	TRUE	FALSE	FALSE	0.0300717	66	0	1	65	T	missense_variant	MODERATE	sru-21	WBGene00005684	transcript	C08F11.4	protein_coding
IV	13626878	A	[G]	{G, A}	0.0151515	1	TRUE	FALSE	TRUE	0.0300717	66	0	1	65	G	missense_variant	MODERATE	sru-21	WBGene00005684	transcript	C08F11.4	protein_coding
IV	13631648	G	[A]	{G, A}	0.0757576	1	TRUE	FALSE	TRUE	0.141106	66	0	5	61	A	missense_variant	MODERATE	sru-21	WBGene00005684	transcript	C08F11.4	protein_coding
IV	13631732	T	[G]	{G, T}	0.0606061	1	TRUE	FALSE	FALSE	0.114735	66	0	4	62	G	missense_variant	MODERATE	sru-21	WBGene00005684	transcript	C08F11.4	protein_coding
IV	13631740	C	[A]	{C, A}	0.0151515	1	TRUE	FALSE	FALSE	0.0300717	66	0	1	65	A	missense_variant	MODERATE	sru-21	WBGene00005684	transcript	C08F11.4	protein_coding
IV	13631864	A	[G]	{G, A}	0.0151515	1	TRUE	FALSE	TRUE	0.0300717	66	0	1	65	G	missense_variant	MODERATE	sru-21	WBGene00005684	transcript	C08F11.4	protein_coding
IV	13632181	G	[A]	{G, A}	0.0151515	1	TRUE	FALSE	TRUE	0.0300717	66	0	1	65	A	missense_variant	MODERATE	sru-21	WBGene00005684	transcript	C08F11.4	protein_coding
IV	13632233	C	[T]	{C, T}	0.0151515	1	TRUE	FALSE	TRUE	0.0300717	66	0	1	65	T	missense_variant	MODERATE	sru-21	WBGene00005684	transcript	C08F11.4	protein_coding
IV	13632545	A	[G]	{G, A}	0.0151515	1	TRUE	FALSE	TRUE	0.0300717	66	0	1	65	G	missense_variant	MODERATE	sru-21	WBGene00005684	transcript	C08F11.4	protein_coding
IV	13633968	C	[T]	{C, T}	0.0151515	1	TRUE	FALSE	TRUE	0.0300717	66	0	1	65	T	missense_variant	MODERATE	fbxa-98	WBGene00007453	transcript	C08F11.5a	protein_coding
IV	13634079	C	[T]	{C, T}	0.0151515	1	TRUE	FALSE	TRUE	0.0300717	66	0	1	65	T	missense_variant	MODERATE	fbxa-98	WBGene00007453	transcript	C08F11.5a	protein_coding
IV	13634080	A	[G]	{G, A}	0.0606061	1	TRUE	FALSE	TRUE	0.114735	66	0	4	62	G	missense_variant	MODERATE	fbxa-98	WBGene00007453	transcript	C08F11.5a	protein_coding
IV	13634212	T	[C]	{C, T}	0.0151515	1	TRUE	FALSE	TRUE	0.0300717	66	0	1	65	C	missense_variant	MODERATE	fbxa-98	WBGene00007453	transcript	C08F11.5a	protein_coding
IV	13634239	T	[A]	{A, T}	0.393939	1	TRUE	FALSE	FALSE	0.481147	66	0	26	40	A	missense_variant	MODERATE	fbxa-98	WBGene00007453	transcript	C08F11.5a	protein_coding
IV	13634257	T	[C]	{C, T}	0.0151515	1	TRUE	FALSE	TRUE	0.0300717	66	0	1	65	C	missense_variant	MODERATE	fbxa-98	WBGene00007453	transcript	C08F11.5a	protein_coding
IV	13634277	A	[G]	{G, A}	0.19697	1	TRUE	FALSE	TRUE	0.31876	66	0	13	53	G	missense_variant	MODERATE	fbxa-98	WBGene00007453	transcript	C08F11.5a	protein_coding
IV	13634457	A	[G]	{G, A}	0.0151515	1	TRUE	FALSE	TRUE	0.0300717	66	0	1	65	G	missense_variant	MODERATE	fbxa-98	WBGene00007453	transcript	C08F11.5a	protein_coding
IV	13634460	T	[C]	{C, T}	0.0151515	1	TRUE	FALSE	TRUE	0.0300717	66	0	1	65	C	missense_variant	MODERATE	fbxa-98	WBGene00007453	transcript	C08F11.5a	protein_coding
IV	13634523	C	[T]	{C, T}	0.0151515	1	TRUE	FALSE	TRUE	0.0300717	66	0	1	65	T	missense_variant	MODERATE	fbxa-98	WBGene00007453	transcript	C08F11.5a	protein_coding
IV	13635035	A	[C]	{C, A}	0.0151515	1	TRUE	FALSE	FALSE	0.0300717	66	0	1	65	C	missense_variant	MODERATE	fbxa-98	WBGene00007453	transcript	C08F11.5a	protein_coding
IV	13635085	C	[A]	{C, A}	0.0151515	1	TRUE	FALSE	FALSE	0.0300717	66	0	1	65	A	missense_variant	MODERATE	fbxa-98	WBGene00007453	transcript	C08F11.5a	protein_coding
IV	13635086	A	[C]	{C, A}	0.0151515	1	TRUE	FALSE	FALSE	0.0300717	66	0	1	65	C	missense_variant	MODERATE	fbxa-98	WBGene00007453	transcript	C08F11.5a	protein_coding
IV	13635090	C	[T]	{C, T}	0.0151515	1	TRUE	FALSE	TRUE	0.0300717	66	0	1	65	T	missense_variant	MODERATE	fbxa-98	WBGene00007453	transcript	C08F11.5a	protein_coding
IV	13635134	G	[A]	{G, A}	0.0454545	1	TRUE	FALSE	TRUE	0.0874393	66	0	3	63	A	missense_variant	MODERATE	fbxa-98	WBGene00007453	transcript	C08F11.5a	protein_coding
IV	13637711	C	[T]	{C, T}	0.430769	0.984848	TRUE	FALSE	TRUE	0.494216	65	0	28	37	T	missense_variant	MODERATE	C08F11.7	WBGene00007454	transcript	C08F11.7	protein_coding
IV	13637787	C	[T]	{C, T}	0.0461538	0.984848	TRUE	FALSE	TRUE	0.0887299	65	0	3	62	T	missense_variant	MODERATE	C08F11.7	WBGene00007454	transcript	C08F11.7	protein_coding
IV	13637958	CGAT	[C]	{C, CGAT}	0.0153846	0.984848	FALSE	TRUE	FALSE	0.0305307	65	0	1	64	C	conservative_inframe_deletion	MODERATE	C08F11.7	WBGene00007454	transcript	C08F11.7	protein_coding
IV	13639359	A	[G]	{G, A}	0.0151515	1	TRUE	FALSE	TRUE	0.0300717	66	0	1	65	G	missense_variant	MODERATE	ugt-22	WBGene00007455	transcript	C08F11.8.1	protein_coding
IV	13641787	C	[G]	{C, G}	0.0454545	1	TRUE	FALSE	FALSE	0.0874393	66	0	3	63	G	missense_variant	MODERATE	ugt-22	WBGene00007455	transcript	C08F11.8.1	protein_coding
IV	13642618	A	[G]	{G, A}	0.0151515	1	TRUE	FALSE	TRUE	0.0300717	66	0	1	65	G	missense_variant	MODERATE	ugt-22	WBGene00007455	transcript	C08F11.8.1	protein_coding
IV	13643381	A	[G]	{G, A}	0.0151515	1	TRUE	FALSE	TRUE	0.0300717	66	0	1	65	G	missense_variant	MODERATE	ugt-22	WBGene00007455	transcript	C08F11.8.1	protein_coding
IV	13643748	C	[A]	{C, A}	0.136364	1	TRUE	FALSE	FALSE	0.237335	66	0	9	57	A	missense_variant	MODERATE	ugt-22	WBGene00007455	transcript	C08F11.8.1	protein_coding
IV	13644517	A	[T]	{A, T}	0.0151515	1	TRUE	FALSE	FALSE	0.0300717	66	0	1	65	T	missense_variant	MODERATE	srz-29	WBGene00007456	transcript	C08F11.9	protein_coding
IV	13644602	A	[G]	{G, A}	0.0151515	1	TRUE	FALSE	TRUE	0.0300717	66	0	1	65	G	missense_variant	MODERATE	srz-29	WBGene00007456	transcript	C08F11.9	protein_coding
IV	13644625	C	[G]	{C, G}	0.0151515	1	TRUE	FALSE	FALSE	0.0300717	66	0	1	65	G	missense_variant	MODERATE	srz-29	WBGene00007456	transcript	C08F11.9	protein_coding
IV	13644650	G	[A]	{G, A}	0.0151515	1	TRUE	FALSE	TRUE	0.0300717	66	0	1	65	A	missense_variant	MODERATE	srz-29	WBGene00007456	transcript	C08F11.9	protein_coding
IV	13644653	C	[T]	{C, T}	0.212121	1	TRUE	FALSE	TRUE	0.336803	66	0	14	52	T	missense_variant	MODERATE	srz-29	WBGene00007456	transcript	C08F11.9	protein_coding
IV	13644657	G	[A]	{G, A}	0.212121	1	TRUE	FALSE	TRUE	0.336803	66	0	14	52	A	missense_variant	MODERATE	srz-29	WBGene00007456	transcript	C08F11.9	protein_coding
IV	13644660	A	[T]	{A, T}	0.227273	1	TRUE	FALSE	FALSE	0.353921	66	0	15	51	T	missense_variant	MODERATE	srz-29	WBGene00007456	transcript	C08F11.9	protein_coding
IV	13644816	A	[T]	{A, T}	0.0909091	1	TRUE	FALSE	FALSE	0.166551	66	0	6	60	T	missense_variant	MODERATE	srz-29	WBGene00007456	transcript	C08F11.9	protein_coding
IV	13644866	G	[A]	{G, A}	0.0307692	0.984848	TRUE	FALSE	TRUE	0.0601073	65	0	2	63	A	missense_variant	MODERATE	srz-29	WBGene00007456	transcript	C08F11.9	protein_coding
IV	13644891	G	[A]	{G, A}	0.030303	1	TRUE	FALSE	TRUE	0.0592181	66	0	2	64	A	missense_variant	MODERATE	srz-29	WBGene00007456	transcript	C08F11.9	protein_coding
IV	13644897	T	[C, A]	{C, A, T}	0.378788	1	TRUE	FALSE	FALSE	0.474208	66	0	25	41	A	missense_variant	MODERATE	srz-29	WBGene00007456	transcript	C08F11.9	protein_coding
IV	13644902	G	[T]	{G, T}	0.030303	1	TRUE	FALSE	FALSE	0.0592181	66	0	2	64	T	missense_variant	MODERATE	srz-29	WBGene00007456	transcript	C08F11.9	protein_coding
IV	13644963	C	[T]	{C, T}	0.0151515	1	TRUE	FALSE	TRUE	0.0300717	66	0	1	65	T	missense_variant	MODERATE	srz-29	WBGene00007456	transcript	C08F11.9	protein_coding
IV	13644969	C	[T]	{C, T}	0.0151515	1	TRUE	FALSE	TRUE	0.0300717	66	0	1	65	T	missense_variant	MODERATE	srz-29	WBGene00007456	transcript	C08F11.9	protein_coding
IV	13645026	A	[C]	{C, A}	0.0151515	1	TRUE	FALSE	FALSE	0.0300717	66	0	1	65	C	missense_variant	MODERATE	srz-29	WBGene00007456	transcript	C08F11.9	protein_coding
IV	13645041	C	[T]	{C, T}	0.030303	1	TRUE	FALSE	TRUE	0.0592181	66	0	2	64	T	missense_variant	MODERATE	srz-29	WBGene00007456	transcript	C08F11.9	protein_coding
IV	13645077	T	[C]	{C, T}	0.030303	1	TRUE	FALSE	TRUE	0.0592181	66	0	2	64	C	missense_variant	MODERATE	srz-29	WBGene00007456	transcript	C08F11.9	protein_coding
IV	13645109	T	[C]	{C, T}	0.0151515	1	TRUE	FALSE	TRUE	0.0300717	66	0	1	65	C	missense_variant	MODERATE	srz-29	WBGene00007456	transcript	C08F11.9	protein_coding
IV	13645239	T	[C]	{C, T}	0.242424	1	TRUE	FALSE	TRUE	0.370113	66	0	16	50	C	missense_variant	MODERATE	srz-29	WBGene00007456	transcript	C08F11.9	protein_coding
IV	13645241	G	[A]	{G, A}	0.030303	1	TRUE	FALSE	TRUE	0.0592181	66	0	2	64	A	missense_variant	MODERATE	srz-29	WBGene00007456	transcript	C08F11.9	protein_coding
IV	13645655	A	[G]	{G, A}	0.0909091	1	TRUE	FALSE	TRUE	0.166551	66	0	6	60	G	missense_variant	MODERATE	srz-29	WBGene00007456	transcript	C08F11.9	protein_coding
IV	13645760	G	[T]	{G, T}	0.030303	1	TRUE	FALSE	FALSE	0.0592181	66	0	2	64	T	missense_variant&splice_region_variant	MODERATE	srz-29	WBGene00007456	transcript	C08F11.9	protein_coding
IV	13645776	G	[T]	{G, T}	0.0151515	1	TRUE	FALSE	FALSE	0.0300717	66	0	1	65	T	missense_variant	MODERATE	srz-29	WBGene00007456	transcript	C08F11.9	protein_coding
IV	13645863	G	[A]	{G, A}	0.227273	1	TRUE	FALSE	TRUE	0.353921	66	0	15	51	A	missense_variant	MODERATE	srz-29	WBGene00007456	transcript	C08F11.9	protein_coding
IV	13645884	T	[C]	{C, T}	0.424242	1	TRUE	FALSE	TRUE	0.492251	66	0	28	38	C	missense_variant	MODERATE	srz-29	WBGene00007456	transcript	C08F11.9	protein_coding
IV	13646884	C	[A]	{C, A}	0.0151515	1	TRUE	FALSE	FALSE	0.0300717	66	0	1	65	A	missense_variant	MODERATE	ule-4	WBGene00007458	transcript	C08F11.11.1	protein_coding
IV	13647379	C	[T]	{C, T}	0.0151515	1	TRUE	FALSE	TRUE	0.0300717	66	0	1	65	T	missense_variant	MODERATE	ule-4	WBGene00007458	transcript	C08F11.11.1	protein_coding
IV	13648292	T	[C]	{C, T}	0.0757576	1	TRUE	FALSE	TRUE	0.141106	66	0	5	61	C	missense_variant	MODERATE	C08F11.10	WBGene00007457	transcript	C08F11.10	protein_coding
IV	13648346	G	[A]	{G, A}	0.0151515	1	TRUE	FALSE	TRUE	0.0300717	66	0	1	65	A	missense_variant	MODERATE	C08F11.10	WBGene00007457	transcript	C08F11.10	protein_coding
IV	13648477	T	[A]	{A, T}	0.0151515	1	TRUE	FALSE	FALSE	0.0300717	66	0	1	65	A	missense_variant	MODERATE	C08F11.10	WBGene00007457	transcript	C08F11.10	protein_coding
IV	13648506	A	[T]	{A, T}	0.0151515	1	TRUE	FALSE	FALSE	0.0300717	66	0	1	65	T	missense_variant	MODERATE	C08F11.10	WBGene00007457	transcript	C08F11.10	protein_coding
IV	13650037	T	[A]	{A, T}	0.384615	0.984848	TRUE	FALSE	FALSE	0.477042	65	0	25	40	A	missense_variant	MODERATE	C08F11.17	WBGene00045069	transcript	C08F11.17	protein_coding
IV	13650092	G	[A]	{G, A}	0.0153846	0.984848	TRUE	FALSE	TRUE	0.0305307	65	0	1	64	A	missense_variant	MODERATE	C08F11.17	WBGene00045069	transcript	C08F11.17	protein_coding
IV	13650326	C	[T]	{C, T}	0.384615	0.984848	TRUE	FALSE	TRUE	0.477042	65	0	25	40	T	missense_variant	MODERATE	C08F11.17	WBGene00045069	transcript	C08F11.17	protein_coding
IV	13650335	A	[G]	{G, A}	0.153846	0.984848	TRUE	FALSE	TRUE	0.262373	65	0	10	55	G	missense_variant	MODERATE	C08F11.17	WBGene00045069	transcript	C08F11.17	protein_coding
IV	13651111	A	[T]	{A, T}	0.109375	0.969697	TRUE	FALSE	FALSE	0.196358	64	0	7	57	T	missense_variant	MODERATE	C08F11.12	WBGene00007459	transcript	C08F11.12	protein_coding
IV	13653959	C	[T]	{C, T}	0.015873	0.954545	TRUE	FALSE	TRUE	0.0314921	63	0	1	62	T	missense_variant	MODERATE	Y45F10C.6	WBGene00044256	transcript	Y45F10C.6	protein_coding
IV	13654328	C	[G]	{C, G}	0.0153846	0.984848	TRUE	FALSE	FALSE	0.0305307	65	0	1	64	G	missense_variant	MODERATE	Y45F10C.6	WBGene00044256	transcript	Y45F10C.6	protein_coding
IV	13654435	C	[T]	{C, T}	0.0153846	0.984848	TRUE	FALSE	TRUE	0.0305307	65	0	1	64	T	missense_variant	MODERATE	Y45F10C.6	WBGene00044256	transcript	Y45F10C.6	protein_coding
IV	13657604	C	[T]	{C, T}	0.0151515	1	TRUE	FALSE	TRUE	0.0300717	66	0	1	65	T	missense_variant	MODERATE	Y45F10C.1	WBGene00012877	transcript	Y45F10C.1	protein_coding
IV	13662209	C	[G]	{C, G}	0.0307692	0.984848	TRUE	FALSE	FALSE	0.0601073	65	0	2	63	G	missense_variant	MODERATE	Y45F10C.2	WBGene00012878	transcript	Y45F10C.2	protein_coding
IV	13662270	T	[A]	{A, T}	0.0769231	0.984848	TRUE	FALSE	FALSE	0.143113	65	0	5	60	A	missense_variant	MODERATE	Y45F10C.2	WBGene00012878	transcript	Y45F10C.2	protein_coding
IV	13665532	C	[A]	{C, A}	0.287879	1	TRUE	FALSE	FALSE	0.413139	66	0	19	47	A	missense_variant	MODERATE	fbxa-215	WBGene00012879	transcript	Y45F10C.3	protein_coding
IV	13665537	T	[C]	{C, T}	0.0151515	1	TRUE	FALSE	TRUE	0.0300717	66	0	1	65	C	missense_variant	MODERATE	fbxa-215	WBGene00012879	transcript	Y45F10C.3	protein_coding
IV	13665780	A	[T]	{A, T}	0.166667	1	TRUE	FALSE	FALSE	0.279898	66	0	11	55	T	missense_variant	MODERATE	fbxa-215	WBGene00012879	transcript	Y45F10C.3	protein_coding
IV	13666184	T	[C]	{C, T}	0.030303	1	TRUE	FALSE	TRUE	0.0592181	66	0	2	64	C	missense_variant	MODERATE	fbxa-215	WBGene00012879	transcript	Y45F10C.3	protein_coding
IV	13666315	C	[A]	{C, A}	0.0151515	1	TRUE	FALSE	FALSE	0.0300717	66	0	1	65	A	missense_variant	MODERATE	fbxa-215	WBGene00012879	transcript	Y45F10C.3	protein_coding
IV	13666840	T	[G]	{G, T}	0.030303	1	TRUE	FALSE	FALSE	0.0592181	66	0	2	64	G	missense_variant	MODERATE	fbxa-215	WBGene00012879	transcript	Y45F10C.3	protein_coding
IV	13674755	T	[C]	{C, T}	0.0923077	0.984848	TRUE	FALSE	TRUE	0.168873	65	0	6	59	C	missense_variant	MODERATE	oac-48	WBGene00011960	transcript	T23G4.4	protein_coding
IV	13674881	A	[G]	{G, A}	0.153846	0.984848	TRUE	FALSE	TRUE	0.262373	65	0	10	55	G	missense_variant	MODERATE	oac-48	WBGene00011960	transcript	T23G4.4	protein_coding
IV	13674940	T	[A]	{A, T}	0.151515	1	TRUE	FALSE	FALSE	0.259079	66	0	10	56	A	missense_variant	MODERATE	oac-48	WBGene00011960	transcript	T23G4.4	protein_coding
IV	13675139	C	[T]	{C, T}	0.0151515	1	TRUE	FALSE	TRUE	0.0300717	66	0	1	65	T	missense_variant&splice_region_variant	MODERATE	oac-48	WBGene00011960	transcript	T23G4.4	protein_coding
IV	13675160	G	[A]	{G, A}	0.0151515	1	TRUE	FALSE	TRUE	0.0300717	66	0	1	65	A	missense_variant	MODERATE	oac-48	WBGene00011960	transcript	T23G4.4	protein_coding
IV	13675686	C	[T]	{C, T}	0.030303	1	TRUE	FALSE	TRUE	0.0592181	66	0	2	64	T	missense_variant&splice_region_variant	MODERATE	oac-48	WBGene00011960	transcript	T23G4.4	protein_coding
IV	13675716	C	[T]	{C, T}	0.030303	1	TRUE	FALSE	TRUE	0.0592181	66	0	2	64	T	missense_variant	MODERATE	oac-48	WBGene00011960	transcript	T23G4.4	protein_coding
IV	13676533	A	[G]	{G, A}	0.0454545	1	TRUE	FALSE	TRUE	0.0874393	66	0	3	63	G	missense_variant	MODERATE	oac-48	WBGene00011960	transcript	T23G4.4	protein_coding
IV	13677774	G	[A]	{G, A}	0.0151515	1	TRUE	FALSE	TRUE	0.0300717	66	0	1	65	A	missense_variant	MODERATE	oac-48	WBGene00011960	transcript	T23G4.4	protein_coding
IV	13679084	T	[A]	{A, T}	0.0151515	1	TRUE	FALSE	FALSE	0.0300717	66	0	1	65	A	missense_variant	MODERATE	T23G4.5	WBGene00011961	transcript	T23G4.5	protein_coding
IV	13679172	T	[G]	{G, T}	0.0151515	1	TRUE	FALSE	FALSE	0.0300717	66	0	1	65	G	missense_variant	MODERATE	T23G4.5	WBGene00011961	transcript	T23G4.5	protein_coding
IV	13680031	G	[A]	{G, A}	0.078125	0.969697	TRUE	FALSE	TRUE	0.145177	64	0	5	59	A	missense_variant	MODERATE	T23G4.5	WBGene00011961	transcript	T23G4.5	protein_coding
IV	13680054	TGAA	[T]	{TGAA, T}	0.03125	0.969697	FALSE	TRUE	FALSE	0.0610236	64	0	2	62	T	disruptive_inframe_deletion	MODERATE	T23G4.5	WBGene00011961	transcript	T23G4.5	protein_coding
IV	13680178	C	[T]	{C, T}	0.0307692	0.984848	TRUE	FALSE	TRUE	0.0601073	65	0	2	63	T	missense_variant	MODERATE	T23G4.5	WBGene00011961	transcript	T23G4.5	protein_coding
IV	13680235	G	[C]	{C, G}	0.0757576	1	TRUE	FALSE	FALSE	0.141106	66	0	5	61	C	missense_variant	MODERATE	T23G4.5	WBGene00011961	transcript	T23G4.5	protein_coding
IV	13685255	C	[A]	{C, A}	0.0151515	1	TRUE	FALSE	FALSE	0.0300717	66	0	1	65	A	missense_variant	MODERATE	nyn-1	WBGene00011959	transcript	T23G4.3	protein_coding
IV	13686444	C	[T]	{C, T}	0.030303	1	TRUE	FALSE	TRUE	0.0592181	66	0	2	64	T	missense_variant	MODERATE	nyn-1	WBGene00011959	transcript	T23G4.3	protein_coding
IV	13686475	T	[G]	{G, T}	0.0454545	1	TRUE	FALSE	FALSE	0.0874393	66	0	3	63	G	missense_variant	MODERATE	nyn-1	WBGene00011959	transcript	T23G4.3	protein_coding
IV	13686627	A	[G]	{G, A}	0.272727	1	TRUE	FALSE	TRUE	0.399722	66	0	18	48	G	missense_variant	MODERATE	nyn-1	WBGene00011959	transcript	T23G4.3	protein_coding
IV	13686712	C	[A]	{C, A}	0.151515	1	TRUE	FALSE	FALSE	0.259079	66	0	10	56	A	missense_variant	MODERATE	nyn-1	WBGene00011959	transcript	T23G4.3	protein_coding
IV	13686883	C	[T]	{C, T}	0.0909091	1	TRUE	FALSE	TRUE	0.166551	66	0	6	60	T	missense_variant	MODERATE	nyn-1	WBGene00011959	transcript	T23G4.3	protein_coding
IV	13688351	G	[C]	{C, G}	0.0909091	1	TRUE	FALSE	FALSE	0.166551	66	0	6	60	C	missense_variant	MODERATE	T23G4.2	WBGene00011958	transcript	T23G4.2.1	protein_coding
IV	13688513	C	[A]	{C, A}	0.0151515	1	TRUE	FALSE	FALSE	0.0300717	66	0	1	65	A	missense_variant	MODERATE	T23G4.2	WBGene00011958	transcript	T23G4.2.1	protein_coding
IV	13688548	A	[C, G]	{G, A}	0.0454545	1	TRUE	FALSE	FALSE	0.0874393	66	0	3	63	C	missense_variant	MODERATE	T23G4.2	WBGene00011958	transcript	T23G4.2.1	protein_coding
IV	13696142	G	[T]	{G, T}	0.0151515	1	TRUE	FALSE	FALSE	0.0300717	66	0	1	65	T	missense_variant	MODERATE	T23G4.127	WBGene00219243	transcript	T23G4.127	protein_coding
IV	13696144	C	[T]	{C, T}	0.0151515	1	TRUE	FALSE	TRUE	0.0300717	66	0	1	65	T	missense_variant	MODERATE	T23G4.127	WBGene00219243	transcript	T23G4.127	protein_coding
IV	13696201	A	[T]	{A, T}	0.0454545	1	TRUE	FALSE	FALSE	0.0874393	66	0	3	63	T	missense_variant	MODERATE	T23G4.127	WBGene00219243	transcript	T23G4.127	protein_coding
IV	13701881	T	[C]	{C, T}	0.016129	0.939394	TRUE	FALSE	TRUE	0.0319958	62	0	1	61	C	missense_variant	MODERATE	tlp-1	WBGene00006580	transcript	T23G4.1	protein_coding
IV	13701907	C	[G]	{C, G}	0.0483871	0.939394	TRUE	FALSE	FALSE	0.0928403	62	0	3	59	G	missense_variant	MODERATE	tlp-1	WBGene00006580	transcript	T23G4.1	protein_coding
IV	13701934	G	[A]	{G, A}	0.016129	0.939394	TRUE	FALSE	TRUE	0.0319958	62	0	1	61	A	missense_variant	MODERATE	tlp-1	WBGene00006580	transcript	T23G4.1	protein_coding
IV	13701946	C	[T]	{C, T}	0.0483871	0.939394	TRUE	FALSE	TRUE	0.0928403	62	0	3	59	T	missense_variant	MODERATE	tlp-1	WBGene00006580	transcript	T23G4.1	protein_coding
IV	13701959	C	[T]	{C, T}	0.016129	0.939394	TRUE	FALSE	TRUE	0.0319958	62	0	1	61	T	missense_variant	MODERATE	tlp-1	WBGene00006580	transcript	T23G4.1	protein_coding
IV	13702317	T	[G]	{G, T}	0.015873	0.954545	TRUE	FALSE	FALSE	0.0314921	63	0	1	62	G	missense_variant	MODERATE	tlp-1	WBGene00006580	transcript	T23G4.1	protein_coding
IV	13702985	A	[ATTG]	{ATTG, A}	0.015873	0.954545	FALSE	TRUE	FALSE	0.0314921	63	0	1	62	ATTG	conservative_inframe_insertion	MODERATE	tlp-1	WBGene00006580	transcript	T23G4.1	protein_coding
IV	13715973	C	[T]	{C, T}	0.0606061	1	TRUE	FALSE	TRUE	0.114735	66	0	4	62	T	missense_variant	MODERATE	C47A4.1	WBGene00008122	transcript	C47A4.1	protein_coding
IV	13716037	T	[G]	{G, T}	0.318182	1	TRUE	FALSE	FALSE	0.437196	66	0	21	45	G	missense_variant	MODERATE	C47A4.1	WBGene00008122	transcript	C47A4.1	protein_coding
IV	13716063	A	[G]	{G, A}	0.15625	0.969697	TRUE	FALSE	TRUE	0.265748	64	0	10	54	G	missense_variant	MODERATE	C47A4.1	WBGene00008122	transcript	C47A4.1	protein_coding
IV	13716094	G	[C]	{C, G}	0.0153846	0.984848	TRUE	FALSE	FALSE	0.0305307	65	0	1	64	C	missense_variant	MODERATE	C47A4.1	WBGene00008122	transcript	C47A4.1	protein_coding
IV	13716154	C	[A]	{C, A}	0.0151515	1	TRUE	FALSE	FALSE	0.0300717	66	0	1	65	A	missense_variant	MODERATE	C47A4.1	WBGene00008122	transcript	C47A4.1	protein_coding
IV	13716198	G	[C]	{C, G}	0.106061	1	TRUE	FALSE	FALSE	0.191071	66	0	7	59	C	missense_variant	MODERATE	C47A4.1	WBGene00008122	transcript	C47A4.1	protein_coding
IV	13728311	C	[T]	{C, T}	0.151515	1	TRUE	FALSE	TRUE	0.259079	66	0	10	56	T	missense_variant	MODERATE	ent-4	WBGene00008123	transcript	C47A4.2b	protein_coding
IV	13728351	G	[A]	{G, A}	0.0151515	1	TRUE	FALSE	TRUE	0.0300717	66	0	1	65	A	missense_variant	MODERATE	ent-4	WBGene00008123	transcript	C47A4.2b	protein_coding
IV	13728362	G	[A]	{G, A}	0.0151515	1	TRUE	FALSE	TRUE	0.0300717	66	0	1	65	A	missense_variant	MODERATE	ent-4	WBGene00008123	transcript	C47A4.2b	protein_coding
IV	13730840	A	[C]	{C, A}	0.0151515	1	TRUE	FALSE	FALSE	0.0300717	66	0	1	65	C	missense_variant&splice_region_variant	MODERATE	ent-4	WBGene00008123	transcript	C47A4.2b	protein_coding
IV	13741062	G	[T]	{G, T}	0.0151515	1	TRUE	FALSE	FALSE	0.0300717	66	0	1	65	T	missense_variant	MODERATE	C47A4.3	WBGene00008124	transcript	C47A4.3	protein_coding
IV	13745758	A	[G]	{G, A}	0.0454545	1	TRUE	FALSE	TRUE	0.0874393	66	0	3	63	G	missense_variant	MODERATE	C47A4.5	WBGene00008125	transcript	C47A4.5	protein_coding
IV	13745842	C	[T]	{C, T}	0.0151515	1	TRUE	FALSE	TRUE	0.0300717	66	0	1	65	T	missense_variant	MODERATE	C47A4.5	WBGene00008125	transcript	C47A4.5	protein_coding
IV	13750450	G	[A]	{G, A}	0.136364	1	TRUE	FALSE	TRUE	0.237335	66	0	9	57	A	missense_variant	MODERATE	sorb-1	WBGene00012891	transcript	Y45F10D.13a	protein_coding
IV	13750460	T	[A]	{A, T}	0.454545	1	TRUE	FALSE	FALSE	0.499653	66	0	30	36	A	missense_variant	MODERATE	sorb-1	WBGene00012891	transcript	Y45F10D.13a	protein_coding
IV	13750474	G	[A]	{G, A}	0.0454545	1	TRUE	FALSE	TRUE	0.0874393	66	0	3	63	A	missense_variant	MODERATE	sorb-1	WBGene00012891	transcript	Y45F10D.13a	protein_coding
IV	13752920	A	[G]	{G, A}	0.0151515	1	TRUE	FALSE	TRUE	0.0300717	66	0	1	65	G	missense_variant	MODERATE	sorb-1	WBGene00012891	transcript	Y45F10D.13a	protein_coding
IV	13752925	C	[G]	{C, G}	0.030303	1	TRUE	FALSE	FALSE	0.0592181	66	0	2	64	G	missense_variant	MODERATE	sorb-1	WBGene00012891	transcript	Y45F10D.13a	protein_coding
IV	13753004	C	[A]	{C, A}	0.0151515	1	TRUE	FALSE	FALSE	0.0300717	66	0	1	65	A	missense_variant	MODERATE	sorb-1	WBGene00012891	transcript	Y45F10D.13a	protein_coding
IV	13753043	C	[T]	{C, T}	0.0151515	1	TRUE	FALSE	TRUE	0.0300717	66	0	1	65	T	missense_variant	MODERATE	sorb-1	WBGene00012891	transcript	Y45F10D.13a	protein_coding
IV	13753143	C	[A]	{C, A}	0.0454545	1	TRUE	FALSE	FALSE	0.0874393	66	0	3	63	A	missense_variant	MODERATE	sorb-1	WBGene00012891	transcript	Y45F10D.13a	protein_coding
IV	13753157	A	[G]	{G, A}	0.0454545	1	TRUE	FALSE	TRUE	0.0874393	66	0	3	63	G	missense_variant	MODERATE	sorb-1	WBGene00012891	transcript	Y45F10D.13a	protein_coding
IV	13755793	C	[A]	{C, A}	0.0151515	1	TRUE	FALSE	FALSE	0.0300717	66	0	1	65	A	missense_variant	MODERATE	sorb-1	WBGene00012891	transcript	Y45F10D.13a	protein_coding
IV	13764626	A	[G]	{G, A}	0.030303	1	TRUE	FALSE	TRUE	0.0592181	66	0	2	64	G	missense_variant	MODERATE	sorb-1	WBGene00012891	transcript	Y45F10D.13c	protein_coding
IV	13765888	G	[A]	{G, A}	0.0151515	1	TRUE	FALSE	TRUE	0.0300717	66	0	1	65	A	missense_variant	MODERATE	sorb-1	WBGene00012891	transcript	Y45F10D.13a	protein_coding
IV	13766589	G	[A]	{G, A}	0.0151515	1	TRUE	FALSE	TRUE	0.0300717	66	0	1	65	A	missense_variant	MODERATE	sorb-1	WBGene00012891	transcript	Y45F10D.13a	protein_coding
IV	13766655	C	[A]	{C, A}	0.0151515	1	TRUE	FALSE	FALSE	0.0300717	66	0	1	65	A	missense_variant	MODERATE	sorb-1	WBGene00012891	transcript	Y45F10D.13a	protein_coding
IV	13766688	C	[T]	{C, T}	0.0757576	1	TRUE	FALSE	TRUE	0.141106	66	0	5	61	T	missense_variant	MODERATE	sorb-1	WBGene00012891	transcript	Y45F10D.13a	protein_coding
IV	13767114	A	[T]	{A, T}	0.0151515	1	TRUE	FALSE	FALSE	0.0300717	66	0	1	65	T	missense_variant	MODERATE	sorb-1	WBGene00012891	transcript	Y45F10D.13a	protein_coding
IV	13767192	A	[C]	{C, A}	0.0227273	1	TRUE	FALSE	FALSE	0.0447606	66	1	1	64	C	missense_variant	MODERATE	sorb-1	WBGene00012891	transcript	Y45F10D.13a	protein_coding
IV	13768965	C	[T]	{C, T}	0.0151515	1	TRUE	FALSE	TRUE	0.0300717	66	0	1	65	T	missense_variant	MODERATE	sorb-1	WBGene00012891	transcript	Y45F10D.13a	protein_coding
IV	13769065	T	[G]	{G, T}	0.0151515	1	TRUE	FALSE	FALSE	0.0300717	66	0	1	65	G	missense_variant	MODERATE	sorb-1	WBGene00012891	transcript	Y45F10D.13a	protein_coding
IV	13769394	G	[A]	{G, A}	0.030303	1	TRUE	FALSE	TRUE	0.0592181	66	0	2	64	A	missense_variant	MODERATE	sorb-1	WBGene00012891	transcript	Y45F10D.13a	protein_coding
IV	13773864	AGTT	[A]	{AGTT, A}	0.181818	1	FALSE	TRUE	FALSE	0.299792	66	2	11	53	A	disruptive_inframe_deletion	MODERATE	Y45F10D.2	WBGene00012883	transcript	Y45F10D.2	protein_coding
IV	13774585	A	[G]	{G, A}	0.454545	1	TRUE	FALSE	TRUE	0.499653	66	0	30	36	G	missense_variant	MODERATE	Y45F10D.2	WBGene00012883	transcript	Y45F10D.2	protein_coding
IV	13779207	C	[T]	{C, T}	0.030303	1	TRUE	FALSE	TRUE	0.0592181	66	0	2	64	T	missense_variant	MODERATE	gly-10	WBGene00001635	transcript	Y45F10D.3a	protein_coding
IV	13779585	A	[G]	{G, A}	0.0151515	1	TRUE	FALSE	TRUE	0.0300717	66	0	1	65	G	missense_variant	MODERATE	gly-10	WBGene00001635	transcript	Y45F10D.3a	protein_coding
IV	13781063	A	[G]	{G, A}	0.0757576	1	TRUE	FALSE	TRUE	0.141106	66	0	5	61	G	missense_variant	MODERATE	gly-10	WBGene00001635	transcript	Y45F10D.3a	protein_coding
IV	13782496	T	[A]	{A, T}	0.318182	1	TRUE	FALSE	FALSE	0.437196	66	0	21	45	A	missense_variant	MODERATE	lact-9	WBGene00012890	transcript	Y45F10D.11a	protein_coding
IV	13783251	G	[A]	{G, A}	0.0151515	1	TRUE	FALSE	TRUE	0.0300717	66	0	1	65	A	missense_variant	MODERATE	lact-9	WBGene00012890	transcript	Y45F10D.11a	protein_coding
IV	13783273	G	[C]	{C, G}	0.0151515	1	TRUE	FALSE	FALSE	0.0300717	66	0	1	65	C	missense_variant	MODERATE	lact-9	WBGene00012890	transcript	Y45F10D.11a	protein_coding
IV	13783297	T	[C]	{C, T}	0.0454545	1	TRUE	FALSE	TRUE	0.0874393	66	0	3	63	C	missense_variant&splice_region_variant	MODERATE	lact-9	WBGene00012890	transcript	Y45F10D.11a	protein_coding
IV	13785004	T	[A]	{A, T}	0.0151515	1	TRUE	FALSE	FALSE	0.0300717	66	0	1	65	A	missense_variant	MODERATE	lact-9	WBGene00012890	transcript	Y45F10D.11a	protein_coding
IV	13785624	G	[A]	{G, A}	0.0151515	1	TRUE	FALSE	TRUE	0.0300717	66	0	1	65	A	missense_variant	MODERATE	lact-9	WBGene00012890	transcript	Y45F10D.11a	protein_coding
IV	13785925	T	[G]	{G, T}	0.136364	1	TRUE	FALSE	FALSE	0.237335	66	0	9	57	G	missense_variant	MODERATE	Y45F10D.10	WBGene00012889	transcript	Y45F10D.10a	protein_coding
IV	13785941	A	[C]	{C, A}	0.454545	1	TRUE	FALSE	FALSE	0.499653	66	0	30	36	C	missense_variant	MODERATE	Y45F10D.10	WBGene00012889	transcript	Y45F10D.10a	protein_coding
IV	13785994	C	[T]	{C, T}	0.0151515	1	TRUE	FALSE	TRUE	0.0300717	66	0	1	65	T	missense_variant	MODERATE	Y45F10D.10	WBGene00012889	transcript	Y45F10D.10a	protein_coding
IV	13786666	C	[T]	{C, T}	0.030303	1	TRUE	FALSE	TRUE	0.0592181	66	0	2	64	T	missense_variant	MODERATE	Y45F10D.10	WBGene00012889	transcript	Y45F10D.10a	protein_coding
IV	13787121	G	[A]	{G, A}	0.0151515	1	TRUE	FALSE	TRUE	0.0300717	66	0	1	65	A	missense_variant	MODERATE	sas-6	WBGene00012888	transcript	Y45F10D.9	protein_coding
IV	13787480	C	[T]	{C, T}	0.0151515	1	TRUE	FALSE	TRUE	0.0300717	66	0	1	65	T	missense_variant	MODERATE	sas-6	WBGene00012888	transcript	Y45F10D.9	protein_coding
IV	13787522	T	[C]	{C, T}	0.0151515	1	TRUE	FALSE	TRUE	0.0300717	66	0	1	65	C	missense_variant	MODERATE	sas-6	WBGene00012888	transcript	Y45F10D.9	protein_coding
IV	13788331	C	[T]	{C, T}	0.0151515	1	TRUE	FALSE	TRUE	0.0300717	66	0	1	65	T	missense_variant	MODERATE	sas-6	WBGene00012888	transcript	Y45F10D.9	protein_coding
IV	13788678	G	[A]	{G, A}	0.030303	1	TRUE	FALSE	TRUE	0.0592181	66	0	2	64	A	missense_variant	MODERATE	sas-6	WBGene00012888	transcript	Y45F10D.9	protein_coding
IV	13789260	G	[A]	{G, A}	0.0454545	1	TRUE	FALSE	TRUE	0.0874393	66	0	3	63	A	missense_variant	MODERATE	Y45F10D.7	WBGene00012887	transcript	Y45F10D.7.1	protein_coding
IV	13789637	T	[G]	{G, T}	0.0151515	1	TRUE	FALSE	FALSE	0.0300717	66	0	1	65	G	missense_variant	MODERATE	Y45F10D.7	WBGene00012887	transcript	Y45F10D.7.1	protein_coding
IV	13789682	C	[G, T]	{C, G}	0.0454545	1	TRUE	FALSE	FALSE	0.0874393	66	0	3	63	G	missense_variant	MODERATE	Y45F10D.7	WBGene00012887	transcript	Y45F10D.7.1	protein_coding
IV	13789866	A	[G]	{G, A}	0.0151515	1	TRUE	FALSE	TRUE	0.0300717	66	0	1	65	G	missense_variant	MODERATE	Y45F10D.7	WBGene00012887	transcript	Y45F10D.7.1	protein_coding
IV	13790923	G	[A]	{G, A}	0.0757576	1	TRUE	FALSE	TRUE	0.141106	66	0	5	61	A	missense_variant	MODERATE	Y45F10D.7	WBGene00012887	transcript	Y45F10D.7.1	protein_coding
IV	13790980	A	[G]	{G, A}	0.333333	1	TRUE	FALSE	TRUE	0.447837	66	0	22	44	G	missense_variant	MODERATE	Y45F10D.7	WBGene00012887	transcript	Y45F10D.7.1	protein_coding
IV	13791103	A	[T]	{A, T}	0.0757576	1	TRUE	FALSE	FALSE	0.141106	66	0	5	61	T	missense_variant	MODERATE	Y45F10D.7	WBGene00012887	transcript	Y45F10D.7.1	protein_coding
IV	13792849	A	[T]	{A, T}	0.121212	1	TRUE	FALSE	FALSE	0.214666	66	0	8	58	T	missense_variant	MODERATE	Y45F10D.7	WBGene00012887	transcript	Y45F10D.7.1	protein_coding
IV	13792850	G	[T]	{G, T}	0.121212	1	TRUE	FALSE	FALSE	0.214666	66	0	8	58	T	missense_variant	MODERATE	Y45F10D.7	WBGene00012887	transcript	Y45F10D.7.1	protein_coding
IV	13793083	G	[A]	{G, A}	0.0151515	1	TRUE	FALSE	TRUE	0.0300717	66	0	1	65	A	missense_variant	MODERATE	Y45F10D.7	WBGene00012887	transcript	Y45F10D.7.1	protein_coding
IV	13794950	A	[G]	{G, A}	0.0151515	1	TRUE	FALSE	TRUE	0.0300717	66	0	1	65	G	missense_variant	MODERATE	Y45F10D.7	WBGene00012887	transcript	Y45F10D.7.1	protein_coding
IV	13796262	A	[G]	{G, A}	0.136364	1	TRUE	FALSE	TRUE	0.237335	66	0	9	57	G	missense_variant	MODERATE	Y45F10D.6	WBGene00012886	transcript	Y45F10D.6	protein_coding
IV	13797049	C	[T]	{C, T}	0.0151515	1	TRUE	FALSE	TRUE	0.0300717	66	0	1	65	T	missense_variant	MODERATE	Y45F10D.6	WBGene00012886	transcript	Y45F10D.6	protein_coding
IV	13797828	G	[A]	{G, A}	0.0151515	1	TRUE	FALSE	TRUE	0.0300717	66	0	1	65	A	missense_variant	MODERATE	Y45F10D.6	WBGene00012886	transcript	Y45F10D.6	protein_coding
IV	13797874	G	[A, C]	{G, A}	0.0151515	1	TRUE	FALSE	FALSE	0.0300717	66	0	1	65	A	missense_variant	MODERATE	Y45F10D.6	WBGene00012886	transcript	Y45F10D.6	protein_coding
IV	13806243	A	[T]	{A, T}	0.0151515	1	TRUE	FALSE	FALSE	0.0300717	66	0	1	65	T	missense_variant	MODERATE	Y45F10D.14	WBGene00012892	transcript	Y45F10D.14	protein_coding
IV	13806829	G	[A]	{G, A}	0.181818	1	TRUE	FALSE	TRUE	0.299792	66	0	12	54	A	missense_variant	MODERATE	Y45F10D.14	WBGene00012892	transcript	Y45F10D.14	protein_coding
IV	13807572	T	[G]	{G, T}	0.0151515	1	TRUE	FALSE	FALSE	0.0300717	66	0	1	65	G	missense_variant	MODERATE	Y45F10D.14	WBGene00012892	transcript	Y45F10D.14	protein_coding
IV	13818529	T	[A]	{A, T}	0.015873	0.954545	TRUE	FALSE	FALSE	0.0314921	63	0	1	62	A	missense_variant	MODERATE	Y45F10D.15	WBGene00012893	transcript	Y45F10D.15	protein_coding
IV	13818657	A	[G]	{G, A}	0.047619	0.954545	TRUE	FALSE	TRUE	0.0914286	63	0	3	60	G	missense_variant	MODERATE	Y45F10D.15	WBGene00012893	transcript	Y45F10D.15	protein_coding
IV	13820959	T	[C]	{C, T}	0.0151515	1	TRUE	FALSE	TRUE	0.0300717	66	0	1	65	C	missense_variant	MODERATE	Y45F10D.15	WBGene00012893	transcript	Y45F10D.15	protein_coding
IV	13829043	A	[T]	{A, T}	0.030303	1	TRUE	FALSE	FALSE	0.0592181	66	0	2	64	T	missense_variant	MODERATE	rga-5	WBGene00010374	transcript	H08M01.2b	protein_coding
IV	13829788	A	[G]	{G, A}	0.272727	1	TRUE	FALSE	TRUE	0.399722	66	0	18	48	G	missense_variant	MODERATE	rga-5	WBGene00010374	transcript	H08M01.2b	protein_coding
IV	13829898	A	[C]	{C, A}	0.030303	1	TRUE	FALSE	FALSE	0.0592181	66	0	2	64	C	missense_variant	MODERATE	rga-5	WBGene00010374	transcript	H08M01.2b	protein_coding
IV	13829951	A	[G]	{G, A}	0.0151515	1	TRUE	FALSE	TRUE	0.0300717	66	0	1	65	G	missense_variant	MODERATE	rga-5	WBGene00010374	transcript	H08M01.2b	protein_coding
IV	13830016	G	[A]	{G, A}	0.030303	1	TRUE	FALSE	TRUE	0.0592181	66	0	2	64	A	missense_variant	MODERATE	rga-5	WBGene00010374	transcript	H08M01.2b	protein_coding
IV	13830028	G	[A]	{G, A}	0.030303	1	TRUE	FALSE	TRUE	0.0592181	66	0	2	64	A	missense_variant	MODERATE	rga-5	WBGene00010374	transcript	H08M01.2b	protein_coding
IV	13830076	C	[T]	{C, T}	0.0454545	1	TRUE	FALSE	TRUE	0.0874393	66	0	3	63	T	missense_variant	MODERATE	rga-5	WBGene00010374	transcript	H08M01.2b	protein_coding
IV	13830123	G	[T]	{G, T}	0.0151515	1	TRUE	FALSE	FALSE	0.0300717	66	0	1	65	T	missense_variant	MODERATE	rga-5	WBGene00010374	transcript	H08M01.2b	protein_coding
IV	13831777	C	[G]	{C, G}	0.272727	1	TRUE	FALSE	FALSE	0.399722	66	0	18	48	G	missense_variant	MODERATE	rga-5	WBGene00010374	transcript	H08M01.2b	protein_coding
IV	13831983	G	[A]	{G, A}	0.0151515	1	TRUE	FALSE	TRUE	0.0300717	66	0	1	65	A	missense_variant	MODERATE	rga-5	WBGene00010374	transcript	H08M01.2b	protein_coding

## Sheet: Low
CHROM	POS	REF	ALT	allele_set	aaf	call_rate	is_snp	is_indel	is_transition	nucl_diversity	num_called	num_het	num_hom_alt	num_hom_ref	ANN	Mutation type	Impact	Gene name	WBGene ID	Transcript?	Gene ID	Gene Type
IV	12491372	T	[C]	{C, T}	0.030303	1	TRUE	FALSE	TRUE	0.0592181	66	0	2	64	C	synonymous_variant	LOW	him-6	WBGene00001865	transcript	T04A11.6	protein_coding
IV	12491630	A	[G]	{G, A}	0.0151515	1	TRUE	FALSE	TRUE	0.0300717	66	0	1	65	G	synonymous_variant	LOW	him-6	WBGene00001865	transcript	T04A11.6	protein_coding
IV	12491871	T	[C]	{C, T}	0.0151515	1	TRUE	FALSE	TRUE	0.0300717	66	0	1	65	C	splice_region_variant&intron_variant	LOW	him-6	WBGene00001865	transcript	T04A11.6	protein_coding
IV	12492119	C	[T]	{C, T}	0.0151515	1	TRUE	FALSE	TRUE	0.0300717	66	0	1	65	T	synonymous_variant	LOW	him-6	WBGene00001865	transcript	T04A11.6	protein_coding
IV	12492134	T	[G]	{G, T}	0.0454545	1	TRUE	FALSE	FALSE	0.0874393	66	0	3	63	G	synonymous_variant	LOW	him-6	WBGene00001865	transcript	T04A11.6	protein_coding
IV	12492763	C	[T]	{C, T}	0.0151515	1	TRUE	FALSE	TRUE	0.0300717	66	0	1	65	T	synonymous_variant	LOW	him-6	WBGene00001865	transcript	T04A11.6	protein_coding
IV	12492781	C	[A]	{C, A}	0.19697	1	TRUE	FALSE	FALSE	0.31876	66	0	13	53	A	synonymous_variant	LOW	him-6	WBGene00001865	transcript	T04A11.6	protein_coding
IV	12493399	G	[A]	{G, A}	0.0151515	1	TRUE	FALSE	TRUE	0.0300717	66	0	1	65	A	synonymous_variant	LOW	him-6	WBGene00001865	transcript	T04A11.6	protein_coding
IV	12493475	A	[G]	{G, A}	0.030303	1	TRUE	FALSE	TRUE	0.0592181	66	0	2	64	G	synonymous_variant	LOW	him-6	WBGene00001865	transcript	T04A11.6	protein_coding
IV	12495107	C	[A]	{C, A}	0.0151515	1	TRUE	FALSE	FALSE	0.0300717	66	0	1	65	A	synonymous_variant	LOW	him-6	WBGene00001865	transcript	T04A11.6	protein_coding
IV	12496300	A	[C]	{C, A}	0.166667	1	TRUE	FALSE	FALSE	0.279898	66	0	11	55	C	synonymous_variant	LOW	sru-20	WBGene00005683	transcript	T04A11.7a	protein_coding
IV	12496429	T	[C]	{C, T}	0.166667	1	TRUE	FALSE	TRUE	0.279898	66	0	11	55	C	synonymous_variant	LOW	sru-20	WBGene00005683	transcript	T04A11.7a	protein_coding
IV	12496455	G	[T]	{G, T}	0.030303	1	TRUE	FALSE	FALSE	0.0592181	66	0	2	64	T	splice_region_variant&intron_variant	LOW	sru-20	WBGene00005683	transcript	T04A11.7a	protein_coding
IV	12497211	T	[G]	{G, T}	0.0151515	1	TRUE	FALSE	FALSE	0.0300717	66	0	1	65	G	synonymous_variant	LOW	sru-20	WBGene00005683	transcript	T04A11.7a	protein_coding
IV	12497793	G	[A]	{G, A}	0.0151515	1	TRUE	FALSE	TRUE	0.0300717	66	0	1	65	A	synonymous_variant	LOW	sru-20	WBGene00005683	transcript	T04A11.7a	protein_coding
IV	12499290	T	[C]	{C, T}	0.0151515	1	TRUE	FALSE	TRUE	0.0300717	66	0	1	65	C	synonymous_variant	LOW	sru-19	WBGene00005682	transcript	T04A11.8	protein_coding
IV	12499368	C	[T]	{C, T}	0.0151515	1	TRUE	FALSE	TRUE	0.0300717	66	0	1	65	T	synonymous_variant	LOW	sru-19	WBGene00005682	transcript	T04A11.8	protein_coding
IV	12499750	TA	[TAA, T]	{TAA, TA, T}	0.0909091	1	FALSE	TRUE	FALSE	0.166551	66	0	6	60	T	splice_region_variant&intron_variant	LOW	sru-19	WBGene00005682	transcript	T04A11.8	protein_coding
IV	12502332	T	[A]	{A, T}	0.0151515	1	TRUE	FALSE	FALSE	0.0300717	66	0	1	65	A	synonymous_variant	LOW	sru-18	WBGene00005681	transcript	T04A11.9	protein_coding
IV	12503564	T	[G]	{G, T}	0.215385	0.984848	TRUE	FALSE	FALSE	0.340608	65	0	14	51	G	synonymous_variant	LOW	sru-18	WBGene00005681	transcript	T04A11.9	protein_coding
IV	12503827	A	[G]	{G, A}	0.323077	0.984848	TRUE	FALSE	TRUE	0.440787	65	0	21	44	G	synonymous_variant	LOW	sru-18	WBGene00005681	transcript	T04A11.9	protein_coding
IV	12503833	G	[A]	{G, A}	0.0307692	0.984848	TRUE	FALSE	TRUE	0.0601073	65	0	2	63	A	splice_region_variant&synonymous_variant	LOW	sru-18	WBGene00005681	transcript	T04A11.9	protein_coding
IV	12504043	A	[G]	{G, A}	0.138462	0.984848	TRUE	FALSE	TRUE	0.240429	65	0	9	56	G	synonymous_variant	LOW	sru-18	WBGene00005681	transcript	T04A11.9	protein_coding
IV	12505864	G	[A]	{G, A}	0.015625	0.969697	TRUE	FALSE	TRUE	0.0310039	64	0	1	63	A	synonymous_variant	LOW	sru-17	WBGene00005680	transcript	T04A11.10	protein_coding
IV	12506560	T	[C]	{C, T}	0.0461538	0.984848	TRUE	FALSE	TRUE	0.0887299	65	0	3	62	C	splice_region_variant&synonymous_variant	LOW	sru-17	WBGene00005680	transcript	T04A11.10	protein_coding
IV	12507009	A	[G]	{G, A}	0.030303	1	TRUE	FALSE	TRUE	0.0592181	66	0	2	64	G	splice_region_variant&intron_variant	LOW	sru-17	WBGene00005680	transcript	T04A11.10	protein_coding
IV	12507342	G	[A]	{G, A}	0.0151515	1	TRUE	FALSE	TRUE	0.0300717	66	0	1	65	A	synonymous_variant	LOW	sru-17	WBGene00005680	transcript	T04A11.10	protein_coding
IV	12514978	A	[G]	{G, A}	0.136364	1	TRUE	FALSE	TRUE	0.237335	66	0	9	57	G	splice_region_variant&intron_variant	LOW	F53B2.7	WBGene00014769	transcript	F53B2.7	pseudogene
IV	12515406	A	[T]	{A, T}	0.0757576	1	TRUE	FALSE	FALSE	0.141106	66	0	5	61	T	splice_region_variant&intron_variant	LOW	F53B2.7	WBGene00014769	transcript	F53B2.7	pseudogene
IV	12519387	G	[T]	{G, T}	0.136364	1	TRUE	FALSE	FALSE	0.237335	66	0	9	57	T	synonymous_variant	LOW	tsp-4	WBGene00006630	transcript	F53B2.2	protein_coding
IV	12521380	G	[A]	{G, A}	0.0151515	1	TRUE	FALSE	TRUE	0.0300717	66	0	1	65	A	synonymous_variant	LOW	sru-13	WBGene00005676	transcript	F53B2.4	protein_coding
IV	12521705	T	[A]	{A, T}	0.030303	1	TRUE	FALSE	FALSE	0.0592181	66	0	2	64	A	splice_region_variant&intron_variant	LOW	sru-13	WBGene00005676	transcript	F53B2.4	protein_coding
IV	12521739	A	[G]	{G, A}	0.0151515	1	TRUE	FALSE	TRUE	0.0300717	66	0	1	65	G	synonymous_variant	LOW	sru-13	WBGene00005676	transcript	F53B2.4	protein_coding
IV	12522454	A	[C]	{C, A}	0.0151515	1	TRUE	FALSE	FALSE	0.0300717	66	0	1	65	C	synonymous_variant	LOW	sru-13	WBGene00005676	transcript	F53B2.4	protein_coding
IV	12524727	C	[T]	{C, T}	0.0151515	1	TRUE	FALSE	TRUE	0.0300717	66	0	1	65	T	synonymous_variant	LOW	eak-4	WBGene00009955	transcript	F53B2.3	protein_coding
IV	12525200	A	[C]	{C, A}	0.030303	1	TRUE	FALSE	FALSE	0.0592181	66	0	2	64	C	synonymous_variant	LOW	eak-4	WBGene00009955	transcript	F53B2.3	protein_coding
IV	12525339	C	[A]	{C, A}	0.0151515	1	TRUE	FALSE	FALSE	0.0300717	66	0	1	65	A	synonymous_variant	LOW	eak-4	WBGene00009955	transcript	F53B2.3	protein_coding
IV	12525435	C	[T]	{C, T}	0.0757576	1	TRUE	FALSE	TRUE	0.141106	66	0	5	61	T	synonymous_variant	LOW	eak-4	WBGene00009955	transcript	F53B2.3	protein_coding
IV	12526486	G	[A]	{G, A}	0.136364	1	TRUE	FALSE	TRUE	0.237335	66	0	9	57	A	synonymous_variant	LOW	F53B2.8	WBGene00009957	transcript	F53B2.8	protein_coding
IV	12526834	T	[C]	{C, T}	0.0151515	1	TRUE	FALSE	TRUE	0.0300717	66	0	1	65	C	synonymous_variant	LOW	F53B2.8	WBGene00009957	transcript	F53B2.8	protein_coding
IV	12528779	A	[G]	{G, A}	0.0454545	1	TRUE	FALSE	TRUE	0.0874393	66	0	3	63	G	synonymous_variant	LOW	F53B2.5	WBGene00009956	transcript	F53B2.5	protein_coding
IV	12530027	A	[C]	{C, A}	0.0454545	1	TRUE	FALSE	FALSE	0.0874393	66	0	3	63	C	splice_region_variant&intron_variant	LOW	F53B2.5	WBGene00009956	transcript	F53B2.5	protein_coding
IV	12530324	GA	[GAA, G]	{GAA, GA}	0.0454545	1	FALSE	TRUE	FALSE	0.0874393	66	0	3	63	G	splice_region_variant&intron_variant	LOW	F53B2.5	WBGene00009956	transcript	F53B2.5	protein_coding
IV	12530493	T	[TAA, TA, TAAA]	{TAA, TAAA, TA, T}	0.136364	1	FALSE	TRUE	FALSE	0.237335	66	0	9	57	TA	splice_region_variant&intron_variant	LOW	F53B2.5	WBGene00009956	transcript	F53B2.5	protein_coding
IV	12542299	G	[C]	{C, G}	0.0151515	1	TRUE	FALSE	FALSE	0.0300717	66	0	1	65	C	synonymous_variant	LOW	ham-1	WBGene00001820	transcript	F53B2.6	protein_coding
IV	12542314	T	[C]	{C, T}	0.106061	1	TRUE	FALSE	TRUE	0.191071	66	0	7	59	C	splice_region_variant&synonymous_variant	LOW	ham-1	WBGene00001820	transcript	F53B2.6	protein_coding
IV	12543692	A	[G]	{G, A}	0.212121	1	TRUE	FALSE	TRUE	0.336803	66	0	14	52	G	synonymous_variant	LOW	ham-1	WBGene00001820	transcript	F53B2.6	protein_coding
IV	12548240	A	[G]	{G, A}	0.0151515	1	TRUE	FALSE	TRUE	0.0300717	66	0	1	65	G	splice_region_variant&intron_variant	LOW	impk-1	WBGene00014081	transcript	ZK795.1	protein_coding
IV	12548976	C	[T]	{C, T}	0.030303	1	TRUE	FALSE	TRUE	0.0592181	66	0	2	64	T	synonymous_variant	LOW	impk-1	WBGene00014081	transcript	ZK795.1	protein_coding
IV	12553779	A	[G]	{G, A}	0.0151515	1	TRUE	FALSE	TRUE	0.0300717	66	0	1	65	G	synonymous_variant	LOW	impk-1	WBGene00014081	transcript	ZK795.1	protein_coding
IV	12553884	A	[G]	{G, A}	0.0151515	1	TRUE	FALSE	TRUE	0.0300717	66	0	1	65	G	synonymous_variant	LOW	impk-1	WBGene00014081	transcript	ZK795.1	protein_coding
IV	12553964	G	[A]	{G, A}	0.0454545	1	TRUE	FALSE	TRUE	0.0874393	66	0	3	63	A	splice_region_variant&intron_variant	LOW	impk-1	WBGene00014081	transcript	ZK795.1	protein_coding
IV	12555471	G	[A]	{G, A}	0.107692	0.984848	TRUE	FALSE	TRUE	0.193679	65	0	7	58	A	splice_region_variant&intron_variant	LOW	ZK795.6	WBGene00194644	transcript	ZK795.6	pseudogene
IV	12555718	CTT	[C, CTTT, CT, CTTTT]	{CTTTT, CTTT, CTT, C, CT}	0.128788	1	FALSE	TRUE	FALSE	0.226116	66	1	8	57	C	splice_region_variant&non_coding_transcript_exon_variant	LOW	anr-56	WBGene00219640	transcript	ZK795.9	pseudogene
IV	12557072	CA	[C]	{C, CA}	0.19697	1	FALSE	TRUE	FALSE	0.31876	66	0	13	53	C	splice_region_variant	LOW	ZK795.2	WBGene00014082	transcript	ZK795.2	protein_coding
IV	12557739	A	[G]	{G, A}	0.0151515	1	TRUE	FALSE	TRUE	0.0300717	66	0	1	65	G	synonymous_variant	LOW	ZK795.2	WBGene00014082	transcript	ZK795.2	protein_coding
IV	12558082	C	[T]	{C, T}	0.136364	1	TRUE	FALSE	TRUE	0.237335	66	0	9	57	T	splice_region_variant&intron_variant	LOW	ZK795.2	WBGene00014082	transcript	ZK795.2	protein_coding
IV	12559567	C	[T]	{C, T}	0.0151515	1	TRUE	FALSE	TRUE	0.0300717	66	0	1	65	T	synonymous_variant	LOW	ZK795.3	WBGene00014083	transcript	ZK795.3	protein_coding
IV	12559750	C	[T]	{C, T}	0.121212	1	TRUE	FALSE	TRUE	0.214666	66	0	8	58	T	synonymous_variant	LOW	ZK795.3	WBGene00014083	transcript	ZK795.3	protein_coding
IV	12560006	C	[T]	{C, T}	0.0151515	1	TRUE	FALSE	TRUE	0.0300717	66	0	1	65	T	synonymous_variant	LOW	ZK795.3	WBGene00014083	transcript	ZK795.3	protein_coding
IV	12560258	T	[G]	{G, T}	0.0151515	1	TRUE	FALSE	FALSE	0.0300717	66	0	1	65	G	synonymous_variant	LOW	ZK795.3	WBGene00014083	transcript	ZK795.3	protein_coding
IV	12560484	G	[A]	{G, A}	0.0151515	1	TRUE	FALSE	TRUE	0.0300717	66	0	1	65	A	synonymous_variant	LOW	ZK795.3	WBGene00014083	transcript	ZK795.3	protein_coding
IV	12564470	A	[G]	{G, A}	0.181818	1	TRUE	FALSE	TRUE	0.299792	66	0	12	54	G	synonymous_variant	LOW	eak-7	WBGene00010671	transcript	K08E7.1.1	protein_coding
IV	12565535	G	[A]	{G, A}	0.0151515	1	TRUE	FALSE	TRUE	0.0300717	66	0	1	65	A	synonymous_variant	LOW	eak-7	WBGene00010671	transcript	K08E7.1.1	protein_coding
IV	12565578	CAA	[CA, CAAA, C]	{C, CAA, CA, CAAA}	0.227273	1	FALSE	TRUE	FALSE	0.353921	66	0	15	51	C	splice_region_variant&intron_variant	LOW	eak-7	WBGene00010671	transcript	K08E7.1.1	protein_coding
IV	12565684	T	[C]	{C, T}	0.030303	1	TRUE	FALSE	TRUE	0.0592181	66	0	2	64	C	synonymous_variant	LOW	eak-7	WBGene00010671	transcript	K08E7.1.1	protein_coding
IV	12565756	G	[A]	{G, A}	0.0151515	1	TRUE	FALSE	TRUE	0.0300717	66	0	1	65	A	synonymous_variant	LOW	eak-7	WBGene00010671	transcript	K08E7.1.1	protein_coding
IV	12567864	C	[G]	{C, G}	0.0151515	1	TRUE	FALSE	FALSE	0.0300717	66	0	1	65	G	synonymous_variant	LOW	let-99	WBGene00002368	transcript	K08E7.3	protein_coding
IV	12568077	C	[A]	{C, A}	0.0151515	1	TRUE	FALSE	FALSE	0.0300717	66	0	1	65	A	synonymous_variant	LOW	let-99	WBGene00002368	transcript	K08E7.3	protein_coding
IV	12568310	C	[T]	{C, T}	0.212121	1	TRUE	FALSE	TRUE	0.336803	66	0	14	52	T	splice_region_variant&intron_variant	LOW	let-99	WBGene00002368	transcript	K08E7.3	protein_coding
IV	12568771	G	[T]	{G, T}	0.030303	1	TRUE	FALSE	FALSE	0.0592181	66	0	2	64	T	synonymous_variant	LOW	let-99	WBGene00002368	transcript	K08E7.3	protein_coding
IV	12568804	T	[C]	{C, T}	0.121212	1	TRUE	FALSE	TRUE	0.214666	66	0	8	58	C	synonymous_variant	LOW	let-99	WBGene00002368	transcript	K08E7.3	protein_coding
IV	12569684	G	[A]	{G, A}	0.0151515	1	TRUE	FALSE	TRUE	0.0300717	66	0	1	65	A	synonymous_variant	LOW	let-99	WBGene00002368	transcript	K08E7.3	protein_coding
IV	12570432	A	[G]	{G, A}	0.0757576	1	TRUE	FALSE	TRUE	0.141106	66	0	5	61	G	synonymous_variant	LOW	let-99	WBGene00002368	transcript	K08E7.3	protein_coding
IV	12570858	T	[G]	{G, T}	0.0307692	0.984848	TRUE	FALSE	FALSE	0.0601073	65	0	2	63	G	synonymous_variant	LOW	K08E7.4	WBGene00010672	transcript	K08E7.4	protein_coding
IV	12571133	T	[C]	{C, T}	0.0151515	1	TRUE	FALSE	TRUE	0.0300717	66	0	1	65	C	5_prime_UTR_premature_start_codon_gain_variant	LOW	K08E7.4	WBGene00010672	transcript	K08E7.4	protein_coding
IV	12574141	T	[C]	{C, T}	0.030303	1	TRUE	FALSE	TRUE	0.0592181	66	0	2	64	C	synonymous_variant	LOW	K08E7.5	WBGene00010673	transcript	K08E7.5a	protein_coding
IV	12574249	T	[C]	{C, T}	0.0151515	1	TRUE	FALSE	TRUE	0.0300717	66	0	1	65	C	synonymous_variant	LOW	K08E7.5	WBGene00010673	transcript	K08E7.5a	protein_coding
IV	12575293	C	[G]	{C, G}	0.030303	1	TRUE	FALSE	FALSE	0.0592181	66	0	2	64	G	synonymous_variant	LOW	K08E7.5	WBGene00010673	transcript	K08E7.5a	protein_coding
IV	12575392	A	[G]	{G, A}	0.0151515	1	TRUE	FALSE	TRUE	0.0300717	66	0	1	65	G	synonymous_variant	LOW	K08E7.5	WBGene00010673	transcript	K08E7.5a	protein_coding
IV	12575872	C	[T]	{C, T}	0.0151515	1	TRUE	FALSE	TRUE	0.0300717	66	0	1	65	T	synonymous_variant	LOW	K08E7.5	WBGene00010673	transcript	K08E7.5a	protein_coding
IV	12577085	A	[T]	{A, T}	0.424242	1	TRUE	FALSE	FALSE	0.492251	66	0	28	38	T	synonymous_variant	LOW	K08E7.5	WBGene00010673	transcript	K08E7.5a	protein_coding
IV	12577147	A	[T]	{A, T}	0.166667	1	TRUE	FALSE	FALSE	0.279898	66	0	11	55	T	splice_region_variant&intron_variant	LOW	K08E7.5	WBGene00010673	transcript	K08E7.5a	protein_coding
IV	12577926	T	[C]	{C, T}	0.0151515	1	TRUE	FALSE	TRUE	0.0300717	66	0	1	65	C	synonymous_variant	LOW	K08E7.5	WBGene00010673	transcript	K08E7.5a	protein_coding
IV	12578623	T	[C]	{C, T}	0.030303	1	TRUE	FALSE	TRUE	0.0592181	66	0	2	64	C	synonymous_variant	LOW	K08E7.5	WBGene00010673	transcript	K08E7.5a	protein_coding
IV	12580153	C	[T]	{C, T}	0.0151515	1	TRUE	FALSE	TRUE	0.0300717	66	0	1	65	T	synonymous_variant	LOW	K08E7.6	WBGene00010674	transcript	K08E7.6	protein_coding
IV	12580982	A	[G]	{G, A}	0.424242	1	TRUE	FALSE	TRUE	0.492251	66	0	28	38	G	splice_region_variant&intron_variant	LOW	K08E7.6	WBGene00010674	transcript	K08E7.6	protein_coding
IV	12585511	T	[G]	{G, T}	0.0151515	1	TRUE	FALSE	FALSE	0.0300717	66	0	1	65	G	synonymous_variant	LOW	K08E7.8	WBGene00010675	transcript	K08E7.8a	protein_coding
IV	12585612	T	[C]	{C, T}	0.0454545	1	TRUE	FALSE	TRUE	0.0874393	66	0	3	63	C	splice_region_variant&intron_variant	LOW	K08E7.8	WBGene00010675	transcript	K08E7.8a	protein_coding
IV	12585725	T	[A]	{A, T}	0.0151515	1	TRUE	FALSE	FALSE	0.0300717	66	0	1	65	A	splice_region_variant&intron_variant	LOW	K08E7.8	WBGene00010675	transcript	K08E7.8a	protein_coding
IV	12586001	T	[C]	{C, T}	0.0909091	1	TRUE	FALSE	TRUE	0.166551	66	2	5	59	C	synonymous_variant	LOW	K08E7.8	WBGene00010675	transcript	K08E7.8a	protein_coding
IV	12586511	T	[A]	{A, T}	0.0757576	1	TRUE	FALSE	FALSE	0.141106	66	0	5	61	A	splice_region_variant	LOW	cul-6	WBGene00000841	transcript	K08E7.7a	protein_coding
IV	12588182	A	[G]	{G, A}	0.030303	1	TRUE	FALSE	TRUE	0.0592181	66	0	2	64	G	synonymous_variant	LOW	cul-6	WBGene00000841	transcript	K08E7.7a	protein_coding
IV	12588800	A	[G]	{G, A}	0.030303	1	TRUE	FALSE	TRUE	0.0592181	66	0	2	64	G	synonymous_variant	LOW	cul-6	WBGene00000841	transcript	K08E7.7a	protein_coding
IV	12589109	A	[G]	{G, A}	0.227273	1	TRUE	FALSE	TRUE	0.353921	66	0	15	51	G	synonymous_variant	LOW	cul-6	WBGene00000841	transcript	K08E7.7a	protein_coding
IV	12589452	G	[A]	{G, A}	0.128788	1	TRUE	FALSE	TRUE	0.226116	66	1	8	57	A	splice_region_variant&intron_variant	LOW	cul-6	WBGene00000841	transcript	K08E7.7a	protein_coding
IV	12590390	A	[T]	{A, T}	0.181818	1	TRUE	FALSE	FALSE	0.299792	66	0	12	54	T	synonymous_variant	LOW	cul-6	WBGene00000841	transcript	K08E7.7a	protein_coding
IV	12592060	A	[G]	{G, A}	0.0151515	1	TRUE	FALSE	TRUE	0.0300717	66	0	1	65	G	synonymous_variant	LOW	pgp-1	WBGene00003995	transcript	K08E7.9	protein_coding
IV	12592671	C	[T]	{C, T}	0.166667	1	TRUE	FALSE	TRUE	0.279898	66	0	11	55	T	synonymous_variant	LOW	pgp-1	WBGene00003995	transcript	K08E7.9	protein_coding
IV	12592864	G	[A]	{G, A}	0.030303	1	TRUE	FALSE	TRUE	0.0592181	66	0	2	64	A	synonymous_variant	LOW	pgp-1	WBGene00003995	transcript	K08E7.9	protein_coding
IV	12593611	G	[A]	{G, A}	0.0454545	1	TRUE	FALSE	TRUE	0.0874393	66	0	3	63	A	synonymous_variant	LOW	pgp-1	WBGene00003995	transcript	K08E7.9	protein_coding
IV	12595072	T	[C]	{C, T}	0.0151515	1	TRUE	FALSE	TRUE	0.0300717	66	0	1	65	C	synonymous_variant	LOW	pgp-1	WBGene00003995	transcript	K08E7.9	protein_coding
IV	12595171	G	[A]	{G, A}	0.121212	1	TRUE	FALSE	TRUE	0.214666	66	0	8	58	A	synonymous_variant	LOW	pgp-1	WBGene00003995	transcript	K08E7.9	protein_coding
IV	12595240	C	[T]	{C, T}	0.030303	1	TRUE	FALSE	TRUE	0.0592181	66	0	2	64	T	synonymous_variant	LOW	pgp-1	WBGene00003995	transcript	K08E7.9	protein_coding
IV	12596783	A	[T]	{A, T}	0.181818	1	TRUE	FALSE	FALSE	0.299792	66	0	12	54	T	splice_region_variant&intron_variant	LOW	pgp-1	WBGene00003995	transcript	K08E7.9	protein_coding
IV	12596845	T	[C]	{C, T}	0.030303	1	TRUE	FALSE	TRUE	0.0592181	66	0	2	64	C	synonymous_variant	LOW	pgp-1	WBGene00003995	transcript	K08E7.9	protein_coding
IV	12599051	G	[A]	{G, A}	0.030303	1	TRUE	FALSE	TRUE	0.0592181	66	0	2	64	A	splice_region_variant&intron_variant	LOW	pgp-1	WBGene00003995	transcript	K08E7.9	protein_coding
IV	12601957	T	[G]	{G, T}	0.0151515	1	TRUE	FALSE	FALSE	0.0300717	66	0	1	65	G	synonymous_variant	LOW	Y55D9A.2	WBGene00013224	transcript	Y55D9A.2b	protein_coding
IV	12604165	G	[A]	{G, A}	0.151515	1	TRUE	FALSE	TRUE	0.259079	66	0	10	56	A	synonymous_variant	LOW	Y55D9A.2	WBGene00013224	transcript	Y55D9A.2b	protein_coding
IV	12604195	C	[T]	{C, T}	0.0757576	1	TRUE	FALSE	TRUE	0.141106	66	0	5	61	T	synonymous_variant	LOW	Y55D9A.2	WBGene00013224	transcript	Y55D9A.2b	protein_coding
IV	12604365	A	[C]	{C, A}	0.030303	1	TRUE	FALSE	FALSE	0.0592181	66	0	2	64	C	splice_region_variant&intron_variant	LOW	Y55D9A.2	WBGene00013224	transcript	Y55D9A.2b	protein_coding
IV	12606233	T	[C]	{C, T}	0.030303	1	TRUE	FALSE	TRUE	0.0592181	66	0	2	64	C	synonymous_variant	LOW	efa-6	WBGene00013223	transcript	Y55D9A.1b	protein_coding
IV	12609932	T	[A]	{A, T}	0.030303	1	TRUE	FALSE	FALSE	0.0592181	66	0	2	64	A	synonymous_variant	LOW	efa-6	WBGene00013223	transcript	Y55D9A.1b	protein_coding
IV	12610016	C	[T]	{C, T}	0.0151515	1	TRUE	FALSE	TRUE	0.0300717	66	0	1	65	T	synonymous_variant	LOW	efa-6	WBGene00013223	transcript	Y55D9A.1b	protein_coding
IV	12610404	TA	[T]	{TA, T}	0.19697	1	FALSE	TRUE	FALSE	0.31876	66	0	13	53	T	splice_region_variant&intron_variant	LOW	efa-6	WBGene00013223	transcript	Y55D9A.1b	protein_coding
IV	12610459	G	[A]	{G, A}	0.0757576	1	TRUE	FALSE	TRUE	0.141106	66	0	5	61	A	synonymous_variant	LOW	efa-6	WBGene00013223	transcript	Y55D9A.1b	protein_coding
IV	12610627	G	[T]	{G, T}	0.0151515	1	TRUE	FALSE	FALSE	0.0300717	66	0	1	65	T	synonymous_variant	LOW	efa-6	WBGene00013223	transcript	Y55D9A.1b	protein_coding
IV	12610748	T	[C]	{C, T}	0.030303	1	TRUE	FALSE	TRUE	0.0592181	66	0	2	64	C	splice_region_variant&intron_variant	LOW	efa-6	WBGene00013223	transcript	Y55D9A.1b	protein_coding
IV	12610913	T	[C]	{C, T}	0.0151515	1	TRUE	FALSE	TRUE	0.0300717	66	0	1	65	C	synonymous_variant	LOW	efa-6	WBGene00013223	transcript	Y55D9A.1b	protein_coding
IV	12611957	AC	[A]	{AC, A}	0.0151515	1	FALSE	TRUE	FALSE	0.0300717	66	0	1	65	A	splice_region_variant&intron_variant	LOW	efa-6	WBGene00013223	transcript	Y55D9A.1b	protein_coding
IV	12611958	C	[A]	{C, A}	0.107692	0.984848	TRUE	FALSE	FALSE	0.193679	65	0	7	58	A	splice_region_variant&intron_variant	LOW	efa-6	WBGene00013223	transcript	Y55D9A.1b	protein_coding
IV	12613412	A	[T]	{A, T}	0.030303	1	TRUE	FALSE	FALSE	0.0592181	66	0	2	64	T	synonymous_variant	LOW	efa-6	WBGene00013223	transcript	Y55D9A.1b	protein_coding
IV	12613502	T	[A]	{A, T}	0.030303	1	TRUE	FALSE	FALSE	0.0592181	66	0	2	64	A	synonymous_variant	LOW	efa-6	WBGene00013223	transcript	Y55D9A.1b	protein_coding
IV	12614681	C	[T]	{C, T}	0.0757576	1	TRUE	FALSE	TRUE	0.141106	66	0	5	61	T	synonymous_variant	LOW	efa-6	WBGene00013223	transcript	Y55D9A.1b	protein_coding
IV	12623962	T	[A]	{A, T}	0.0151515	1	TRUE	FALSE	FALSE	0.0300717	66	0	1	65	A	synonymous_variant	LOW	ark-1	WBGene00000186	transcript	C01C7.1a	protein_coding
IV	12625125	T	[C]	{C, T}	0.136364	1	TRUE	FALSE	TRUE	0.237335	66	0	9	57	C	synonymous_variant	LOW	ark-1	WBGene00000186	transcript	C01C7.1a	protein_coding
IV	12626349	A	[T]	{A, T}	0.0151515	1	TRUE	FALSE	FALSE	0.0300717	66	0	1	65	T	splice_region_variant&intron_variant	LOW	ark-1	WBGene00000186	transcript	C01C7.1a	protein_coding
IV	12626682	A	[G]	{G, A}	0.0151515	1	TRUE	FALSE	TRUE	0.0300717	66	0	1	65	G	synonymous_variant	LOW	ark-1	WBGene00000186	transcript	C01C7.1a	protein_coding
IV	12627781	T	[A]	{A, T}	0.0151515	1	TRUE	FALSE	FALSE	0.0300717	66	0	1	65	A	synonymous_variant	LOW	ark-1	WBGene00000186	transcript	C01C7.1a	protein_coding
IV	12628413	C	[G]	{C, G}	0.0151515	1	TRUE	FALSE	FALSE	0.0300717	66	0	1	65	G	synonymous_variant	LOW	ark-1	WBGene00000186	transcript	C01C7.1a	protein_coding
IV	12628437	A	[G]	{G, A}	0.0151515	1	TRUE	FALSE	TRUE	0.0300717	66	0	1	65	G	synonymous_variant	LOW	ark-1	WBGene00000186	transcript	C01C7.1a	protein_coding
IV	12628629	C	[T]	{C, T}	0.0151515	1	TRUE	FALSE	TRUE	0.0300717	66	0	1	65	T	synonymous_variant	LOW	ark-1	WBGene00000186	transcript	C01C7.1a	protein_coding
IV	12629478	GA	[G]	{G, GA}	0.030303	1	FALSE	TRUE	FALSE	0.0592181	66	0	2	64	G	splice_region_variant&intron_variant	LOW	ark-1	WBGene00000186	transcript	C01C7.1a	protein_coding
IV	12640491	G	[A]	{G, A}	0.0151515	1	TRUE	FALSE	TRUE	0.0300717	66	0	1	65	A	synonymous_variant	LOW	vha-7	WBGene00006916	transcript	C26H9A.1b	protein_coding
IV	12643868	G	[A]	{G, A}	0.0151515	1	TRUE	FALSE	TRUE	0.0300717	66	0	1	65	A	splice_region_variant&intron_variant	LOW	vha-7	WBGene00006916	transcript	C26H9A.1b	protein_coding
IV	12644720	G	[A]	{G, A}	0.409091	1	TRUE	FALSE	TRUE	0.487162	66	0	27	39	A	synonymous_variant	LOW	vha-7	WBGene00006916	transcript	C26H9A.1b	protein_coding
IV	12644997	T	[C]	{C, T}	0.0757576	1	TRUE	FALSE	TRUE	0.141106	66	0	5	61	C	synonymous_variant	LOW	vha-7	WBGene00006916	transcript	C26H9A.1b	protein_coding
IV	12646005	T	[C]	{C, T}	0.0151515	1	TRUE	FALSE	TRUE	0.0300717	66	0	1	65	C	synonymous_variant	LOW	vha-7	WBGene00006916	transcript	C26H9A.1b	protein_coding
IV	12646510	C	[A]	{C, A}	0.0757576	1	TRUE	FALSE	FALSE	0.141106	66	0	5	61	A	synonymous_variant	LOW	vha-7	WBGene00006916	transcript	C26H9A.1b	protein_coding
IV	12646680	A	[T]	{A, T}	0.030303	1	TRUE	FALSE	FALSE	0.0592181	66	0	2	64	T	splice_region_variant&intron_variant	LOW	vha-7	WBGene00006916	transcript	C26H9A.1b	protein_coding
IV	12646776	T	[C]	{C, T}	0.0454545	1	TRUE	FALSE	TRUE	0.0874393	66	0	3	63	C	synonymous_variant	LOW	vha-7	WBGene00006916	transcript	C26H9A.1b	protein_coding
IV	12654822	G	[T]	{G, T}	0.0151515	1	TRUE	FALSE	FALSE	0.0300717	66	0	1	65	T	synonymous_variant	LOW	wdfy-3	WBGene00007752	transcript	C26H9A.2c	protein_coding
IV	12654840	G	[A, T]	{G, A, T}	0.030303	1	TRUE	FALSE	FALSE	0.0592181	66	0	2	64	A	synonymous_variant	LOW	wdfy-3	WBGene00007752	transcript	C26H9A.2c	protein_coding
IV	12655667	G	[T]	{G, T}	0.0151515	1	TRUE	FALSE	FALSE	0.0300717	66	0	1	65	T	synonymous_variant	LOW	wdfy-3	WBGene00007752	transcript	C26H9A.2c	protein_coding
IV	12657109	T	[C]	{C, T}	0.0151515	1	TRUE	FALSE	TRUE	0.0300717	66	0	1	65	C	synonymous_variant	LOW	wdfy-3	WBGene00007752	transcript	C26H9A.2c	protein_coding
IV	12657181	G	[A]	{G, A}	0.0454545	1	TRUE	FALSE	TRUE	0.0874393	66	0	3	63	A	synonymous_variant	LOW	wdfy-3	WBGene00007752	transcript	C26H9A.2c	protein_coding
IV	12658959	A	[C]	{C, A}	0.0151515	1	TRUE	FALSE	FALSE	0.0300717	66	0	1	65	C	synonymous_variant	LOW	wdfy-3	WBGene00007752	transcript	C26H9A.2c	protein_coding
IV	12661258	A	[C]	{C, A}	0.212121	1	TRUE	FALSE	FALSE	0.336803	66	0	14	52	C	synonymous_variant	LOW	wdfy-3	WBGene00007752	transcript	C26H9A.2c	protein_coding
IV	12661636	C	[A]	{C, A}	0.0769231	0.984848	TRUE	FALSE	FALSE	0.143113	65	0	5	60	A	synonymous_variant	LOW	wdfy-3	WBGene00007752	transcript	C26H9A.2c	protein_coding
IV	12663111	G	[A]	{G, A}	0.0153846	0.984848	TRUE	FALSE	TRUE	0.0305307	65	0	1	64	A	synonymous_variant	LOW	wdfy-3	WBGene00007752	transcript	C26H9A.2c	protein_coding
IV	12664593	C	[T]	{C, T}	0.0153846	0.984848	TRUE	FALSE	TRUE	0.0305307	65	0	1	64	T	synonymous_variant	LOW	wdfy-3	WBGene00007752	transcript	C26H9A.2c	protein_coding
IV	12665530	T	[C]	{C, T}	0.0153846	0.984848	TRUE	FALSE	TRUE	0.0305307	65	0	1	64	C	synonymous_variant	LOW	wdfy-3	WBGene00007752	transcript	C26H9A.2c	protein_coding
IV	12665631	C	[T]	{C, T}	0.0153846	0.984848	TRUE	FALSE	TRUE	0.0305307	65	0	1	64	T	synonymous_variant	LOW	wdfy-3	WBGene00007752	transcript	C26H9A.2c	protein_coding
IV	12668289	C	[T]	{C, T}	0.0769231	0.984848	TRUE	FALSE	TRUE	0.143113	65	0	5	60	T	synonymous_variant	LOW	wdfy-3	WBGene00007752	transcript	C26H9A.2c	protein_coding
IV	12671877	T	[C]	{C, T}	0.0461538	0.984848	TRUE	FALSE	TRUE	0.0887299	65	0	3	62	C	synonymous_variant	LOW	wdfy-3	WBGene00007752	transcript	C26H9A.2c	protein_coding
IV	12673380	C	[T]	{C, T}	0.0307692	0.984848	TRUE	FALSE	TRUE	0.0601073	65	0	2	63	T	synonymous_variant	LOW	wdfy-3	WBGene00007752	transcript	C26H9A.2c	protein_coding
IV	12674306	T	[C]	{C, T}	0.215385	0.984848	TRUE	FALSE	TRUE	0.340608	65	0	14	51	C	synonymous_variant	LOW	wdfy-3	WBGene00007752	transcript	C26H9A.2c	protein_coding
IV	12675404	A	[G]	{G, A}	0.16129	0.939394	TRUE	FALSE	TRUE	0.272751	62	0	10	52	G	synonymous_variant	LOW	T23B5.4	WBGene00011941	transcript	T23B5.4b	protein_coding
IV	12675770	T	[C]	{C, T}	0.016129	0.939394	TRUE	FALSE	TRUE	0.0319958	62	0	1	61	C	synonymous_variant	LOW	T23B5.4	WBGene00011941	transcript	T23B5.4b	protein_coding
IV	12675924	G	[A]	{G, A}	0.0322581	0.939394	TRUE	FALSE	TRUE	0.0629426	62	0	2	60	A	synonymous_variant	LOW	T23B5.4	WBGene00011941	transcript	T23B5.4b	protein_coding
IV	12677945	G	[A]	{G, A}	0.0153846	0.984848	TRUE	FALSE	TRUE	0.0305307	65	0	1	64	A	synonymous_variant	LOW	prmt-9	WBGene00011939	transcript	T23B5.1a	protein_coding
IV	12681006	C	[T]	{C, T}	0.078125	0.969697	TRUE	FALSE	TRUE	0.145177	64	0	5	59	T	splice_region_variant&intron_variant	LOW	prmt-9	WBGene00011939	transcript	T23B5.1a	protein_coding
IV	12681017	G	[C]	{C, G}	0.078125	0.969697	TRUE	FALSE	FALSE	0.145177	64	0	5	59	C	synonymous_variant	LOW	prmt-9	WBGene00011939	transcript	T23B5.1a	protein_coding
IV	12681161	G	[A]	{G, A}	0.0625	0.969697	TRUE	FALSE	TRUE	0.11811	64	0	4	60	A	synonymous_variant	LOW	prmt-9	WBGene00011939	transcript	T23B5.1a	protein_coding
IV	12683872	A	[T]	{A, T}	0.0769231	0.984848	TRUE	FALSE	FALSE	0.143113	65	0	5	60	T	splice_region_variant&intron_variant	LOW	prmt-9	WBGene00011939	transcript	T23B5.1a	protein_coding
IV	12684109	A	[C]	{C, A}	0.0461538	0.984848	TRUE	FALSE	FALSE	0.0887299	65	0	3	62	C	synonymous_variant	LOW	prmt-9	WBGene00011939	transcript	T23B5.1a	protein_coding
IV	12692258	C	[T]	{C, T}	0.0153846	0.984848	TRUE	FALSE	TRUE	0.0305307	65	0	1	64	T	synonymous_variant	LOW	T23B5.3	WBGene00011940	transcript	T23B5.3d	protein_coding
IV	12692333	T	[C]	{C, T}	0.107692	0.984848	TRUE	FALSE	TRUE	0.193679	65	0	7	58	C	synonymous_variant	LOW	T23B5.3	WBGene00011940	transcript	T23B5.3d	protein_coding
IV	12693295	A	[G]	{G, A}	0.107692	0.984848	TRUE	FALSE	TRUE	0.193679	65	0	7	58	G	synonymous_variant	LOW	T23B5.3	WBGene00011940	transcript	T23B5.3d	protein_coding
IV	12693343	G	[A]	{G, A}	0.0461538	0.984848	TRUE	FALSE	TRUE	0.0887299	65	0	3	62	A	synonymous_variant	LOW	T23B5.3	WBGene00011940	transcript	T23B5.3d	protein_coding
IV	12694309	A	[T]	{A, T}	0.0769231	0.984848	TRUE	FALSE	FALSE	0.143113	65	0	5	60	T	synonymous_variant	LOW	T23B5.3	WBGene00011940	transcript	T23B5.3d	protein_coding
IV	12694658	T	[C]	{C, T}	0.0153846	0.984848	TRUE	FALSE	TRUE	0.0305307	65	0	1	64	C	splice_region_variant&intron_variant	LOW	T23B5.3	WBGene00011940	transcript	T23B5.3d	protein_coding
IV	12704280	C	[T]	{C, T}	0.0153846	0.984848	TRUE	FALSE	TRUE	0.0305307	65	0	1	64	T	synonymous_variant	LOW	C27D8.4	WBGene00007780	transcript	C27D8.4	protein_coding
IV	12704427	C	[A]	{C, A}	0.0461538	0.984848	TRUE	FALSE	FALSE	0.0887299	65	0	3	62	A	synonymous_variant	LOW	C27D8.4	WBGene00007780	transcript	C27D8.4	protein_coding
IV	12706706	T	[C]	{C, T}	0.0461538	0.984848	TRUE	FALSE	TRUE	0.0887299	65	0	3	62	C	synonymous_variant	LOW	C27D8.4	WBGene00007780	transcript	C27D8.4	protein_coding
IV	12707727	C	[T]	{C, T}	0.184615	0.984848	TRUE	FALSE	TRUE	0.303399	65	0	12	53	T	synonymous_variant	LOW	C27D8.3	WBGene00007779	transcript	C27D8.3b	protein_coding
IV	12708244	C	[T]	{C, T}	0.0153846	0.984848	TRUE	FALSE	TRUE	0.0305307	65	0	1	64	T	synonymous_variant	LOW	C27D8.3	WBGene00007779	transcript	C27D8.3b	protein_coding
IV	12709787	A	[G]	{G, A}	0.0461538	0.984848	TRUE	FALSE	TRUE	0.0887299	65	0	3	62	G	synonymous_variant	LOW	C27D8.3	WBGene00007779	transcript	C27D8.3b	protein_coding
IV	12709919	C	[G]	{C, G}	0.0461538	0.984848	TRUE	FALSE	FALSE	0.0887299	65	0	3	62	G	synonymous_variant	LOW	C27D8.3	WBGene00007779	transcript	C27D8.3b	protein_coding
IV	12712946	G	[A]	{G, A}	0.0153846	0.984848	TRUE	FALSE	TRUE	0.0305307	65	0	1	64	A	synonymous_variant	LOW	C27D8.2	WBGene00007778	transcript	C27D8.2	protein_coding
IV	12713443	T	[A]	{A, T}	0.0153846	0.984848	TRUE	FALSE	FALSE	0.0305307	65	0	1	64	A	splice_region_variant&intron_variant	LOW	C27D8.2	WBGene00007778	transcript	C27D8.2	protein_coding
IV	12713689	A	[C]	{C, A}	0.215385	0.984848	TRUE	FALSE	FALSE	0.340608	65	0	14	51	C	synonymous_variant	LOW	C27D8.2	WBGene00007778	transcript	C27D8.2	protein_coding
IV	12713903	G	[A]	{G, A}	0.0307692	0.984848	TRUE	FALSE	TRUE	0.0601073	65	0	2	63	A	synonymous_variant	LOW	C27D8.2	WBGene00007778	transcript	C27D8.2	protein_coding
IV	12714143	G	[A]	{G, A}	0.0307692	0.984848	TRUE	FALSE	TRUE	0.0601073	65	0	2	63	A	splice_region_variant&intron_variant	LOW	C27D8.2	WBGene00007778	transcript	C27D8.2	protein_coding
IV	12714623	A	[G]	{G, A}	0.215385	0.984848	TRUE	FALSE	TRUE	0.340608	65	0	14	51	G	synonymous_variant	LOW	C27D8.2	WBGene00007778	transcript	C27D8.2	protein_coding
IV	12720022	T	[C]	{C, T}	0.215385	0.984848	TRUE	FALSE	TRUE	0.340608	65	0	14	51	C	synonymous_variant	LOW	T23F6.1	WBGene00011949	transcript	T23F6.1	protein_coding
IV	12721926	G	[C]	{C, G}	0.0153846	0.984848	TRUE	FALSE	FALSE	0.0305307	65	0	1	64	C	synonymous_variant	LOW	T23F6.2	WBGene00011950	transcript	T23F6.2	protein_coding
IV	12725327	T	[C]	{C, T}	0.0153846	0.984848	TRUE	FALSE	TRUE	0.0305307	65	0	1	64	C	synonymous_variant	LOW	rbd-1	WBGene00004315	transcript	T23F6.4a.1	protein_coding
IV	12725351	T	[C]	{C, T}	0.0153846	0.984848	TRUE	FALSE	TRUE	0.0305307	65	0	1	64	C	synonymous_variant	LOW	rbd-1	WBGene00004315	transcript	T23F6.4a.1	protein_coding
IV	12725667	A	[G]	{G, A}	0.0153846	0.984848	TRUE	FALSE	TRUE	0.0305307	65	0	1	64	G	synonymous_variant	LOW	rbd-1	WBGene00004315	transcript	T23F6.4a.1	protein_coding
IV	12725739	G	[T]	{G, T}	0.0153846	0.984848	TRUE	FALSE	FALSE	0.0305307	65	0	1	64	T	synonymous_variant	LOW	rbd-1	WBGene00004315	transcript	T23F6.4a.1	protein_coding
IV	12726063	T	[C]	{C, T}	0.0153846	0.984848	TRUE	FALSE	TRUE	0.0305307	65	0	1	64	C	synonymous_variant	LOW	rbd-1	WBGene00004315	transcript	T23F6.4a.1	protein_coding
IV	12726111	A	[T]	{A, T}	0.0153846	0.984848	TRUE	FALSE	FALSE	0.0305307	65	0	1	64	T	synonymous_variant	LOW	rbd-1	WBGene00004315	transcript	T23F6.4a.1	protein_coding
IV	12726222	A	[T]	{A, T}	0.0769231	0.984848	TRUE	FALSE	FALSE	0.143113	65	0	5	60	T	synonymous_variant	LOW	rbd-1	WBGene00004315	transcript	T23F6.4a.1	protein_coding
IV	12728277	G	[A]	{G, A}	0.0153846	0.984848	TRUE	FALSE	TRUE	0.0305307	65	0	1	64	A	synonymous_variant	LOW	rbd-1	WBGene00004315	transcript	T23F6.4a.1	protein_coding
IV	12728463	G	[A]	{G, A}	0.0461538	0.984848	TRUE	FALSE	TRUE	0.0887299	65	0	3	62	A	synonymous_variant	LOW	rbd-1	WBGene00004315	transcript	T23F6.4a.1	protein_coding
IV	12728478	A	[G]	{G, A}	0.0153846	0.984848	TRUE	FALSE	TRUE	0.0305307	65	0	1	64	G	synonymous_variant	LOW	rbd-1	WBGene00004315	transcript	T23F6.4a.1	protein_coding
IV	12729457	T	[A]	{A, T}	0.0153846	0.984848	TRUE	FALSE	FALSE	0.0305307	65	0	1	64	A	synonymous_variant	LOW	rbd-1	WBGene00004315	transcript	T23F6.4a.1	protein_coding
IV	12736143	T	[C]	{C, T}	0.19697	1	TRUE	FALSE	TRUE	0.31876	66	0	13	53	C	synonymous_variant	LOW	T23F6.5	WBGene00011952	transcript	T23F6.5	protein_coding
IV	12736188	A	[G]	{G, A}	0.030303	1	TRUE	FALSE	TRUE	0.0592181	66	0	2	64	G	synonymous_variant	LOW	T23F6.5	WBGene00011952	transcript	T23F6.5	protein_coding
IV	12736233	G	[A]	{G, A}	0.121212	1	TRUE	FALSE	TRUE	0.214666	66	0	8	58	A	synonymous_variant	LOW	T23F6.5	WBGene00011952	transcript	T23F6.5	protein_coding
IV	12737105	T	[A]	{A, T}	0.166667	1	TRUE	FALSE	FALSE	0.279898	66	0	11	55	A	synonymous_variant	LOW	T23F6.5	WBGene00011952	transcript	T23F6.5	protein_coding
IV	12737739	C	[G]	{C, G}	0.0151515	1	TRUE	FALSE	FALSE	0.0300717	66	0	1	65	G	synonymous_variant	LOW	T23F6.5	WBGene00011952	transcript	T23F6.5	protein_coding
IV	12737977	C	[T]	{C, T}	0.0757576	1	TRUE	FALSE	TRUE	0.141106	66	0	5	61	T	synonymous_variant	LOW	T23F6.5	WBGene00011952	transcript	T23F6.5	protein_coding
IV	12738384	G	[A]	{G, A}	0.0151515	1	TRUE	FALSE	TRUE	0.0300717	66	0	1	65	A	synonymous_variant	LOW	T23F6.5	WBGene00011952	transcript	T23F6.5	protein_coding
IV	12740451	T	[A]	{A, T}	0.0151515	1	TRUE	FALSE	FALSE	0.0300717	66	0	1	65	A	splice_region_variant&non_coding_transcript_exon_variant	LOW	Transcript:T23F6.6	Transcript:T23F6.6	transcript	T23F6.6b	miRNA
IV	12743442	C	[T]	{C, T}	0.0454545	1	TRUE	FALSE	TRUE	0.0874393	66	0	3	63	T	synonymous_variant	LOW	C36H8.1	WBGene00007987	transcript	C36H8.1	protein_coding
IV	12743724	T	[G]	{G, T}	0.0151515	1	TRUE	FALSE	FALSE	0.0300717	66	0	1	65	G	synonymous_variant	LOW	C36H8.1	WBGene00007987	transcript	C36H8.1	protein_coding
IV	12743748	C	[T]	{C, T}	0.030303	1	TRUE	FALSE	TRUE	0.0592181	66	0	2	64	T	synonymous_variant	LOW	C36H8.1	WBGene00007987	transcript	C36H8.1	protein_coding
IV	12743946	T	[C]	{C, T}	0.212121	1	TRUE	FALSE	TRUE	0.336803	66	0	14	52	C	synonymous_variant	LOW	C36H8.1	WBGene00007987	transcript	C36H8.1	protein_coding
IV	12747872	G	[T]	{G, T}	0.0151515	1	TRUE	FALSE	FALSE	0.0300717	66	0	1	65	T	splice_region_variant&intron_variant	LOW	inx-6	WBGene00002128	transcript	C36H8.2	protein_coding
IV	12765711	T	[C]	{C, T}	0.0151515	1	TRUE	FALSE	TRUE	0.0300717	66	0	1	65	C	synonymous_variant	LOW	ZK897.10	WBGene00206520	transcript	ZK897.10b	protein_coding
IV	12776263	A	[G]	{G, A}	0.242424	1	TRUE	FALSE	TRUE	0.370113	66	0	16	50	G	synonymous_variant	LOW	unc-31	WBGene00006767	transcript	ZK897.1j	protein_coding
IV	12776403	A	[G]	{G, A}	0.030303	1	TRUE	FALSE	TRUE	0.0592181	66	0	2	64	G	splice_region_variant&synonymous_variant	LOW	unc-31	WBGene00006767	transcript	ZK897.1j	protein_coding
IV	12776857	GC	[G]	{G, GC}	0.0151515	1	FALSE	TRUE	FALSE	0.0300717	66	0	1	65	G	splice_region_variant&intron_variant	LOW	unc-31	WBGene00006767	transcript	ZK897.1j	protein_coding
IV	12776858	C	[T]	{C, T}	0.0208333	0.727273	TRUE	FALSE	TRUE	0.0412281	48	0	1	47	T	splice_region_variant&intron_variant	LOW	unc-31	WBGene00006767	transcript	ZK897.1j	protein_coding
IV	12776858	CTT	[CT, C]	{CTT, C, CT}	0.28125	0.969697	FALSE	TRUE	FALSE	0.40748	64	0	18	46	C	splice_region_variant&intron_variant	LOW	unc-31	WBGene00006767	transcript	ZK897.1j	protein_coding
IV	12777556	G	[C]	{C, G}	0.136364	1	TRUE	FALSE	FALSE	0.237335	66	0	9	57	C	synonymous_variant	LOW	unc-31	WBGene00006767	transcript	ZK897.1j	protein_coding
IV	12781550	GT	[G, GTT]	{GTT, GT}	0.0151515	1	FALSE	TRUE	FALSE	0.0300717	66	0	1	65	G	splice_region_variant&intron_variant	LOW	unc-31	WBGene00006767	transcript	ZK897.1j	protein_coding
IV	12781805	G	[A]	{G, A}	0.0151515	1	TRUE	FALSE	TRUE	0.0300717	66	0	1	65	A	synonymous_variant	LOW	unc-31	WBGene00006767	transcript	ZK897.1j	protein_coding
IV	12782502	T	[C]	{C, T}	0.242424	1	TRUE	FALSE	TRUE	0.370113	66	0	16	50	C	synonymous_variant	LOW	unc-31	WBGene00006767	transcript	ZK897.1j	protein_coding
IV	12783742	T	[C]	{C, T}	0.0151515	1	TRUE	FALSE	TRUE	0.0300717	66	0	1	65	C	synonymous_variant	LOW	unc-31	WBGene00006767	transcript	ZK897.1j	protein_coding
IV	12783831	G	[T]	{G, T}	0.030303	1	TRUE	FALSE	FALSE	0.0592181	66	0	2	64	T	splice_region_variant&intron_variant	LOW	unc-31	WBGene00006767	transcript	ZK897.1j	protein_coding
IV	12787430	T	[C]	{C, T}	0.0151515	1	TRUE	FALSE	TRUE	0.0300717	66	0	1	65	C	synonymous_variant	LOW	unc-31	WBGene00006767	transcript	ZK897.1j	protein_coding
IV	12794749	A	[G]	{G, A}	0.0454545	1	TRUE	FALSE	TRUE	0.0874393	66	0	3	63	G	synonymous_variant	LOW	pin-2	WBGene00004030	transcript	F07C6.1a	protein_coding
IV	12795008	C	[T]	{C, T}	0.030303	1	TRUE	FALSE	TRUE	0.0592181	66	0	2	64	T	synonymous_variant	LOW	pin-2	WBGene00004030	transcript	F07C6.1a	protein_coding
IV	12795745	G	[T]	{G, T}	0.0151515	1	TRUE	FALSE	FALSE	0.0300717	66	0	1	65	T	splice_region_variant&intron_variant	LOW	pin-2	WBGene00004030	transcript	F07C6.1b	protein_coding
IV	12806055	A	[G]	{G, A}	0.0151515	1	TRUE	FALSE	TRUE	0.0300717	66	0	1	65	G	splice_region_variant&intron_variant	LOW	F07C6.4	WBGene00008555	transcript	F07C6.4d	protein_coding
IV	12806290	A	[T]	{A, T}	0.0151515	1	TRUE	FALSE	FALSE	0.0300717	66	0	1	65	T	synonymous_variant	LOW	F07C6.4	WBGene00008555	transcript	F07C6.4d	protein_coding
IV	12806482	C	[T]	{C, T}	0.0151515	1	TRUE	FALSE	TRUE	0.0300717	66	0	1	65	T	synonymous_variant	LOW	F07C6.4	WBGene00008555	transcript	F07C6.4d	protein_coding
IV	12806503	A	[G]	{G, A}	0.257576	1	TRUE	FALSE	TRUE	0.385381	66	0	17	49	G	splice_region_variant&synonymous_variant	LOW	F07C6.4	WBGene00008555	transcript	F07C6.4d	protein_coding
IV	12810322	T	[C]	{C, T}	0.0153846	0.984848	TRUE	FALSE	TRUE	0.0305307	65	0	1	64	C	splice_region_variant&intron_variant	LOW	F07C6.4	WBGene00008555	transcript	F07C6.4d	protein_coding
IV	12823719	C	[G]	{C, G}	0.0151515	1	TRUE	FALSE	FALSE	0.0300717	66	0	1	65	G	synonymous_variant	LOW	F07C6.4	WBGene00008555	transcript	F07C6.4d	protein_coding
IV	12823827	C	[A]	{C, A}	0.030303	1	TRUE	FALSE	FALSE	0.0592181	66	0	2	64	A	splice_region_variant&intron_variant	LOW	F07C6.4	WBGene00008555	transcript	F07C6.4d	protein_coding
IV	12823990	G	[A]	{G, A}	0.030303	1	TRUE	FALSE	TRUE	0.0592181	66	0	2	64	A	synonymous_variant	LOW	M02B1.4	WBGene00010829	transcript	M02B1.4	protein_coding
IV	12824047	A	[T]	{A, T}	0.0151515	1	TRUE	FALSE	FALSE	0.0300717	66	0	1	65	T	synonymous_variant	LOW	M02B1.4	WBGene00010829	transcript	M02B1.4	protein_coding
IV	12824178	T	[A]	{A, T}	0.242424	1	TRUE	FALSE	FALSE	0.370113	66	0	16	50	A	splice_region_variant&intron_variant	LOW	M02B1.4	WBGene00010829	transcript	M02B1.4	protein_coding
IV	12824587	C	[T]	{C, T}	0.0454545	1	TRUE	FALSE	TRUE	0.0874393	66	0	3	63	T	synonymous_variant	LOW	M02B1.4	WBGene00010829	transcript	M02B1.4	protein_coding
IV	12824719	C	[G]	{C, G}	0.0151515	1	TRUE	FALSE	FALSE	0.0300717	66	0	1	65	G	synonymous_variant	LOW	M02B1.4	WBGene00010829	transcript	M02B1.4	protein_coding
IV	12824749	G	[A]	{G, A}	0.0151515	1	TRUE	FALSE	TRUE	0.0300717	66	0	1	65	A	synonymous_variant	LOW	M02B1.4	WBGene00010829	transcript	M02B1.4	protein_coding
IV	12824812	C	[T]	{C, T}	0.0151515	1	TRUE	FALSE	TRUE	0.0300717	66	0	1	65	T	synonymous_variant	LOW	M02B1.4	WBGene00010829	transcript	M02B1.4	protein_coding
IV	12824832	T	[A]	{A, T}	0.030303	1	TRUE	FALSE	FALSE	0.0592181	66	0	2	64	A	splice_region_variant&intron_variant	LOW	M02B1.4	WBGene00010829	transcript	M02B1.4	protein_coding
IV	12825502	G	[A]	{G, A}	0.0151515	1	TRUE	FALSE	TRUE	0.0300717	66	0	1	65	A	synonymous_variant	LOW	F07C6.4	WBGene00008555	transcript	F07C6.4d	protein_coding
IV	12825757	G	[A]	{G, A}	0.030303	1	TRUE	FALSE	TRUE	0.0592181	66	0	2	64	A	synonymous_variant	LOW	F07C6.4	WBGene00008555	transcript	F07C6.4d	protein_coding
IV	12826796	C	[T]	{C, T}	0.0151515	1	TRUE	FALSE	TRUE	0.0300717	66	0	1	65	T	synonymous_variant	LOW	F07C6.4	WBGene00008555	transcript	F07C6.4e	protein_coding
IV	12827548	C	[T]	{C, T}	0.0151515	1	TRUE	FALSE	TRUE	0.0300717	66	0	1	65	T	splice_region_variant&synonymous_variant	LOW	F07C6.4	WBGene00008555	transcript	F07C6.4d	protein_coding
IV	12827590	T	[C]	{C, T}	0.0151515	1	TRUE	FALSE	TRUE	0.0300717	66	0	1	65	C	synonymous_variant	LOW	F07C6.4	WBGene00008555	transcript	F07C6.4d	protein_coding
IV	12827596	G	[A]	{G, A}	0.0151515	1	TRUE	FALSE	TRUE	0.0300717	66	0	1	65	A	synonymous_variant	LOW	F07C6.4	WBGene00008555	transcript	F07C6.4d	protein_coding
IV	12828176	T	[A]	{A, T}	0.0153846	0.984848	TRUE	FALSE	FALSE	0.0305307	65	0	1	64	A	synonymous_variant	LOW	F07C6.4	WBGene00008555	transcript	F07C6.4d	protein_coding
IV	12828290	T	[C]	{C, T}	0.0151515	1	TRUE	FALSE	TRUE	0.0300717	66	0	1	65	C	synonymous_variant	LOW	F07C6.4	WBGene00008555	transcript	F07C6.4d	protein_coding
IV	12828293	T	[A]	{A, T}	0.0151515	1	TRUE	FALSE	FALSE	0.0300717	66	0	1	65	A	synonymous_variant	LOW	F07C6.4	WBGene00008555	transcript	F07C6.4d	protein_coding
IV	12828341	A	[G]	{G, A}	0.0151515	1	TRUE	FALSE	TRUE	0.0300717	66	0	1	65	G	synonymous_variant	LOW	F07C6.4	WBGene00008555	transcript	F07C6.4d	protein_coding
IV	12828344	A	[G]	{G, A}	0.0151515	1	TRUE	FALSE	TRUE	0.0300717	66	0	1	65	G	synonymous_variant	LOW	F07C6.4	WBGene00008555	transcript	F07C6.4d	protein_coding
IV	12828494	C	[G]	{C, G}	0.0151515	1	TRUE	FALSE	FALSE	0.0300717	66	0	1	65	G	synonymous_variant	LOW	F07C6.4	WBGene00008555	transcript	F07C6.4d	protein_coding
IV	12828500	G	[A]	{G, A}	0.0151515	1	TRUE	FALSE	TRUE	0.0300717	66	0	1	65	A	synonymous_variant	LOW	F07C6.4	WBGene00008555	transcript	F07C6.4d	protein_coding
IV	12828506	G	[A]	{G, A}	0.0151515	1	TRUE	FALSE	TRUE	0.0300717	66	0	1	65	A	synonymous_variant	LOW	F07C6.4	WBGene00008555	transcript	F07C6.4d	protein_coding
IV	12829335	A	[G]	{G, A}	0.348485	1	TRUE	FALSE	TRUE	0.457553	66	0	23	43	G	splice_region_variant&intron_variant	LOW	F07C6.4	WBGene00008555	transcript	F07C6.4d	protein_coding
IV	12829339	T	[C]	{C, T}	0.469697	1	TRUE	FALSE	TRUE	0.501966	66	0	31	35	C	splice_region_variant&intron_variant	LOW	F07C6.4	WBGene00008555	transcript	F07C6.4d	protein_coding
IV	12829348	T	[C]	{C, T}	0.348485	1	TRUE	FALSE	TRUE	0.457553	66	0	23	43	C	synonymous_variant	LOW	F07C6.4	WBGene00008555	transcript	F07C6.4d	protein_coding
IV	12829375	T	[C]	{C, T}	0.348485	1	TRUE	FALSE	TRUE	0.457553	66	0	23	43	C	synonymous_variant	LOW	F07C6.4	WBGene00008555	transcript	F07C6.4d	protein_coding
IV	12829396	C	[T]	{C, T}	0.348485	1	TRUE	FALSE	TRUE	0.457553	66	0	23	43	T	synonymous_variant	LOW	F07C6.4	WBGene00008555	transcript	F07C6.4d	protein_coding
IV	12829441	C	[A]	{C, A}	0.348485	1	TRUE	FALSE	FALSE	0.457553	66	0	23	43	A	synonymous_variant	LOW	F07C6.4	WBGene00008555	transcript	F07C6.4d	protein_coding
IV	12829447	A	[G]	{G, A}	0.348485	1	TRUE	FALSE	TRUE	0.457553	66	0	23	43	G	synonymous_variant	LOW	F07C6.4	WBGene00008555	transcript	F07C6.4d	protein_coding
IV	12829516	T	[G]	{G, T}	0.348485	1	TRUE	FALSE	FALSE	0.457553	66	0	23	43	G	synonymous_variant	LOW	F07C6.4	WBGene00008555	transcript	F07C6.4d	protein_coding
IV	12829573	G	[A]	{G, A}	0.30303	1	TRUE	FALSE	TRUE	0.42563	66	0	20	46	A	synonymous_variant	LOW	F07C6.4	WBGene00008555	transcript	F07C6.4d	protein_coding
IV	12829597	G	[T]	{G, T}	0.0151515	1	TRUE	FALSE	FALSE	0.0300717	66	0	1	65	T	synonymous_variant	LOW	F07C6.4	WBGene00008555	transcript	F07C6.4d	protein_coding
IV	12830110	C	[T]	{C, T}	0.333333	1	TRUE	FALSE	TRUE	0.447837	66	0	22	44	T	splice_region_variant	LOW	F07C6.4	WBGene00008555	transcript	F07C6.4d	protein_coding
IV	12836609	T	[C]	{C, T}	0.0151515	1	TRUE	FALSE	TRUE	0.0300717	66	0	1	65	C	synonymous_variant	LOW	M02B1.3	WBGene00010828	transcript	M02B1.3b.1	protein_coding
IV	12837322	C	[T]	{C, T}	0.0508475	0.893939	TRUE	FALSE	TRUE	0.097349	59	0	3	56	T	synonymous_variant	LOW	M02B1.3	WBGene00010828	transcript	M02B1.3b.1	protein_coding
IV	12837418	A	[G]	{G, A}	0.101695	0.893939	TRUE	FALSE	TRUE	0.184268	59	0	6	53	G	synonymous_variant	LOW	M02B1.3	WBGene00010828	transcript	M02B1.3b.1	protein_coding
IV	12838704	T	[G]	{G, T}	0.0909091	1	TRUE	FALSE	FALSE	0.166551	66	0	6	60	G	synonymous_variant	LOW	M02B1.3	WBGene00010828	transcript	M02B1.3b.1	protein_coding
IV	12838737	C	[T]	{C, T}	0.030303	1	TRUE	FALSE	TRUE	0.0592181	66	0	2	64	T	synonymous_variant	LOW	M02B1.3	WBGene00010828	transcript	M02B1.3b.1	protein_coding
IV	12838785	G	[A]	{G, A}	0.0151515	1	TRUE	FALSE	TRUE	0.0300717	66	0	1	65	A	synonymous_variant	LOW	M02B1.3	WBGene00010828	transcript	M02B1.3b.1	protein_coding
IV	12838824	G	[A]	{G, A}	0.0151515	1	TRUE	FALSE	TRUE	0.0300717	66	0	1	65	A	synonymous_variant	LOW	M02B1.3	WBGene00010828	transcript	M02B1.3b.1	protein_coding
IV	12838911	A	[C]	{C, A}	0.0909091	1	TRUE	FALSE	FALSE	0.166551	66	0	6	60	C	synonymous_variant	LOW	M02B1.3	WBGene00010828	transcript	M02B1.3b.1	protein_coding
IV	12838935	C	[T]	{C, T}	0.0909091	1	TRUE	FALSE	TRUE	0.166551	66	0	6	60	T	synonymous_variant	LOW	M02B1.3	WBGene00010828	transcript	M02B1.3b.1	protein_coding
IV	12838962	A	[T]	{A, T}	0.0151515	1	TRUE	FALSE	FALSE	0.0300717	66	0	1	65	T	synonymous_variant	LOW	M02B1.3	WBGene00010828	transcript	M02B1.3b.1	protein_coding
IV	12838968	C	[T]	{C, T}	0.0151515	1	TRUE	FALSE	TRUE	0.0300717	66	0	1	65	T	synonymous_variant	LOW	M02B1.3	WBGene00010828	transcript	M02B1.3b.1	protein_coding
IV	12839084	T	[A]	{A, T}	0.0909091	1	TRUE	FALSE	FALSE	0.166551	66	0	6	60	A	synonymous_variant	LOW	M02B1.3	WBGene00010828	transcript	M02B1.3b.1	protein_coding
IV	12839099	T	[C]	{C, T}	0.0909091	1	TRUE	FALSE	TRUE	0.166551	66	0	6	60	C	synonymous_variant	LOW	M02B1.3	WBGene00010828	transcript	M02B1.3b.1	protein_coding
IV	12839174	A	[G]	{G, A}	0.0909091	1	TRUE	FALSE	TRUE	0.166551	66	0	6	60	G	splice_region_variant&synonymous_variant	LOW	M02B1.3	WBGene00010828	transcript	M02B1.3b.1	protein_coding
IV	12839183	T	[A]	{A, T}	0.0909091	1	TRUE	FALSE	FALSE	0.166551	66	0	6	60	A	splice_region_variant&intron_variant	LOW	M02B1.3	WBGene00010828	transcript	M02B1.3b.1	protein_coding
IV	12845984	T	[G]	{G, T}	0.106061	1	TRUE	FALSE	FALSE	0.191071	66	0	7	59	G	synonymous_variant	LOW	M02B1.2	WBGene00010827	transcript	M02B1.2.1	protein_coding
IV	12846014	T	[G]	{G, T}	0.0909091	1	TRUE	FALSE	FALSE	0.166551	66	0	6	60	G	synonymous_variant	LOW	M02B1.2	WBGene00010827	transcript	M02B1.2.1	protein_coding
IV	12846653	A	[T]	{A, T}	0.151515	1	TRUE	FALSE	FALSE	0.259079	66	0	10	56	T	splice_region_variant&intron_variant	LOW	M02B1.2	WBGene00010827	transcript	M02B1.2.1	protein_coding
IV	12846662	C	[T]	{C, T}	0.0151515	1	TRUE	FALSE	TRUE	0.0300717	66	0	1	65	T	splice_region_variant&synonymous_variant	LOW	M02B1.2	WBGene00010827	transcript	M02B1.2.1	protein_coding
IV	12846665	A	[G]	{G, A}	0.151515	1	TRUE	FALSE	TRUE	0.259079	66	0	10	56	G	synonymous_variant	LOW	M02B1.2	WBGene00010827	transcript	M02B1.2.1	protein_coding
IV	12847252	T	[C]	{C, T}	0.151515	1	TRUE	FALSE	TRUE	0.259079	66	0	10	56	C	synonymous_variant	LOW	M02B1.2	WBGene00010827	transcript	M02B1.2.1	protein_coding
IV	12847258	G	[C]	{C, G}	0.151515	1	TRUE	FALSE	FALSE	0.259079	66	0	10	56	C	synonymous_variant	LOW	M02B1.2	WBGene00010827	transcript	M02B1.2.1	protein_coding
IV	12847376	T	[G]	{G, T}	0.151515	1	TRUE	FALSE	FALSE	0.259079	66	0	10	56	G	synonymous_variant	LOW	M02B1.2	WBGene00010827	transcript	M02B1.2.1	protein_coding
IV	12847427	A	[G]	{G, A}	0.151515	1	TRUE	FALSE	TRUE	0.259079	66	0	10	56	G	synonymous_variant	LOW	M02B1.2	WBGene00010827	transcript	M02B1.2.1	protein_coding
IV	12847448	T	[C]	{C, T}	0.151515	1	TRUE	FALSE	TRUE	0.259079	66	0	10	56	C	synonymous_variant	LOW	M02B1.2	WBGene00010827	transcript	M02B1.2.1	protein_coding
IV	12847922	C	[T]	{C, T}	0.151515	1	TRUE	FALSE	TRUE	0.259079	66	0	10	56	T	synonymous_variant	LOW	M02B1.2	WBGene00010827	transcript	M02B1.2.1	protein_coding
IV	12849551	T	[C]	{C, T}	0.151515	1	TRUE	FALSE	TRUE	0.259079	66	0	10	56	C	synonymous_variant	LOW	srf-3	WBGene00005153	transcript	M02B1.1a	protein_coding
IV	12849557	G	[T]	{G, T}	0.151515	1	TRUE	FALSE	FALSE	0.259079	66	0	10	56	T	synonymous_variant	LOW	srf-3	WBGene00005153	transcript	M02B1.1a	protein_coding
IV	12849563	C	[T]	{C, T}	0.151515	1	TRUE	FALSE	TRUE	0.259079	66	0	10	56	T	synonymous_variant	LOW	srf-3	WBGene00005153	transcript	M02B1.1a	protein_coding
IV	12849601	C	[T]	{C, T}	0.151515	1	TRUE	FALSE	TRUE	0.259079	66	0	10	56	T	splice_region_variant&intron_variant	LOW	srf-3	WBGene00005153	transcript	M02B1.1a	protein_coding
IV	12850683	G	[C]	{C, G}	0.151515	1	TRUE	FALSE	FALSE	0.259079	66	0	10	56	C	synonymous_variant	LOW	srf-3	WBGene00005153	transcript	M02B1.1a	protein_coding
IV	12850799	T	[C]	{C, T}	0.151515	1	TRUE	FALSE	TRUE	0.259079	66	0	10	56	C	synonymous_variant	LOW	srf-3	WBGene00005153	transcript	M02B1.1a	protein_coding
IV	12850808	C	[T]	{C, T}	0.030303	1	TRUE	FALSE	TRUE	0.0592181	66	0	2	64	T	synonymous_variant	LOW	srf-3	WBGene00005153	transcript	M02B1.1a	protein_coding
IV	12850835	T	[C]	{C, T}	0.181818	1	TRUE	FALSE	TRUE	0.299792	66	0	12	54	C	synonymous_variant	LOW	srf-3	WBGene00005153	transcript	M02B1.1a	protein_coding
IV	12850895	A	[G]	{G, A}	0.181818	1	TRUE	FALSE	TRUE	0.299792	66	0	12	54	G	synonymous_variant	LOW	srf-3	WBGene00005153	transcript	M02B1.1a	protein_coding
IV	12850907	A	[T]	{A, T}	0.0806452	0.939394	TRUE	FALSE	FALSE	0.149489	62	0	5	57	T	splice_region_variant&intron_variant	LOW	srf-3	WBGene00005153	transcript	M02B1.1a	protein_coding
IV	12851603	T	[C]	{C, T}	0.181818	1	TRUE	FALSE	TRUE	0.299792	66	0	12	54	C	synonymous_variant	LOW	srf-3	WBGene00005153	transcript	M02B1.1a	protein_coding
IV	12851606	C	[T]	{C, T}	0.181818	1	TRUE	FALSE	TRUE	0.299792	66	0	12	54	T	synonymous_variant	LOW	srf-3	WBGene00005153	transcript	M02B1.1a	protein_coding
IV	12852341	T	[A]	{A, T}	0.181818	1	TRUE	FALSE	FALSE	0.299792	66	0	12	54	A	synonymous_variant	LOW	srf-3	WBGene00005153	transcript	M02B1.1a	protein_coding
IV	12852425	C	[T]	{C, T}	0.030303	1	TRUE	FALSE	TRUE	0.0592181	66	0	2	64	T	synonymous_variant	LOW	srf-3	WBGene00005153	transcript	M02B1.1a	protein_coding
IV	12852431	T	[C]	{C, T}	0.181818	1	TRUE	FALSE	TRUE	0.299792	66	0	12	54	C	synonymous_variant	LOW	srf-3	WBGene00005153	transcript	M02B1.1a	protein_coding
IV	12852503	T	[C]	{C, T}	0.181818	1	TRUE	FALSE	TRUE	0.299792	66	0	12	54	C	synonymous_variant	LOW	srf-3	WBGene00005153	transcript	M02B1.1a	protein_coding
IV	12852647	T	[C]	{C, T}	0.0454545	1	TRUE	FALSE	TRUE	0.0874393	66	0	3	63	C	splice_region_variant&intron_variant	LOW	srf-3	WBGene00005153	transcript	M02B1.1a	protein_coding
IV	12856460	A	[G]	{G, A}	0.030303	1	TRUE	FALSE	TRUE	0.0592181	66	0	2	64	G	synonymous_variant	LOW	nstp-5	WBGene00014139	transcript	ZK896.9a	protein_coding
IV	12856580	G	[T]	{G, T}	0.0757576	1	TRUE	FALSE	FALSE	0.141106	66	0	5	61	T	synonymous_variant	LOW	nstp-5	WBGene00014139	transcript	ZK896.9a	protein_coding
IV	12856586	A	[G]	{G, A}	0.0757576	1	TRUE	FALSE	TRUE	0.141106	66	0	5	61	G	synonymous_variant	LOW	nstp-5	WBGene00014139	transcript	ZK896.9a	protein_coding
IV	12856589	T	[C]	{C, T}	0.0757576	1	TRUE	FALSE	TRUE	0.141106	66	0	5	61	C	synonymous_variant	LOW	nstp-5	WBGene00014139	transcript	ZK896.9a	protein_coding
IV	12856601	A	[G]	{G, A}	0.0757576	1	TRUE	FALSE	TRUE	0.141106	66	0	5	61	G	synonymous_variant	LOW	nstp-5	WBGene00014139	transcript	ZK896.9a	protein_coding
IV	12856679	G	[A]	{G, A}	0.0757576	1	TRUE	FALSE	TRUE	0.141106	66	0	5	61	A	splice_region_variant&intron_variant	LOW	nstp-5	WBGene00014139	transcript	ZK896.9a	protein_coding
IV	12856681	G	[A]	{G, A}	0.0757576	1	TRUE	FALSE	TRUE	0.141106	66	0	5	61	A	splice_region_variant&intron_variant	LOW	nstp-5	WBGene00014139	transcript	ZK896.9a	protein_coding
IV	12857864	G	[C]	{C, G}	0.0454545	1	TRUE	FALSE	FALSE	0.0874393	66	0	3	63	C	synonymous_variant	LOW	nstp-5	WBGene00014139	transcript	ZK896.9a	protein_coding
IV	12857993	A	[C]	{C, A}	0.0757576	1	TRUE	FALSE	FALSE	0.141106	66	0	5	61	C	synonymous_variant	LOW	nstp-5	WBGene00014139	transcript	ZK896.9a	protein_coding
IV	12858087	C	[T]	{C, T}	0.0757576	1	TRUE	FALSE	TRUE	0.141106	66	0	5	61	T	synonymous_variant	LOW	nstp-5	WBGene00014139	transcript	ZK896.9a	protein_coding
IV	12858107	C	[T]	{C, T}	0.0757576	1	TRUE	FALSE	TRUE	0.141106	66	0	5	61	T	synonymous_variant	LOW	nstp-5	WBGene00014139	transcript	ZK896.9a	protein_coding
IV	12859029	C	[T]	{C, T}	0.0454545	1	TRUE	FALSE	TRUE	0.0874393	66	0	3	63	T	synonymous_variant	LOW	nstp-5	WBGene00014139	transcript	ZK896.9a	protein_coding
IV	12859149	T	[C]	{C, T}	0.0757576	1	TRUE	FALSE	TRUE	0.141106	66	0	5	61	C	synonymous_variant	LOW	nstp-5	WBGene00014139	transcript	ZK896.9a	protein_coding
IV	12859152	T	[G]	{G, T}	0.0757576	1	TRUE	FALSE	FALSE	0.141106	66	0	5	61	G	synonymous_variant	LOW	nstp-5	WBGene00014139	transcript	ZK896.9a	protein_coding
IV	12859155	C	[T]	{C, T}	0.0757576	1	TRUE	FALSE	TRUE	0.141106	66	0	5	61	T	synonymous_variant	LOW	nstp-5	WBGene00014139	transcript	ZK896.9a	protein_coding
IV	12859312	C	[T]	{C, T}	0.0757576	1	TRUE	FALSE	TRUE	0.141106	66	0	5	61	T	synonymous_variant	LOW	nstp-5	WBGene00014139	transcript	ZK896.9a	protein_coding
IV	12860148	G	[T]	{G, T}	0.0757576	1	TRUE	FALSE	FALSE	0.141106	66	0	5	61	T	synonymous_variant	LOW	gcy-18	WBGene00001543	transcript	ZK896.8	protein_coding
IV	12860217	A	[G]	{G, A}	0.0757576	1	TRUE	FALSE	TRUE	0.141106	66	0	5	61	G	synonymous_variant	LOW	gcy-18	WBGene00001543	transcript	ZK896.8	protein_coding
IV	12860250	C	[T]	{C, T}	0.0757576	1	TRUE	FALSE	TRUE	0.141106	66	0	5	61	T	synonymous_variant	LOW	gcy-18	WBGene00001543	transcript	ZK896.8	protein_coding
IV	12860263	C	[T]	{C, T}	0.0757576	1	TRUE	FALSE	TRUE	0.141106	66	0	5	61	T	synonymous_variant	LOW	gcy-18	WBGene00001543	transcript	ZK896.8	protein_coding
IV	12860268	G	[A]	{G, A}	0.0454545	1	TRUE	FALSE	TRUE	0.0874393	66	0	3	63	A	synonymous_variant	LOW	gcy-18	WBGene00001543	transcript	ZK896.8	protein_coding
IV	12860334	T	[C]	{C, T}	0.0153846	0.984848	TRUE	FALSE	TRUE	0.0305307	65	0	1	64	C	synonymous_variant	LOW	gcy-18	WBGene00001543	transcript	ZK896.8	protein_coding
IV	12860352	T	[C]	{C, T}	0.0307692	0.984848	TRUE	FALSE	TRUE	0.0601073	65	0	2	63	C	synonymous_variant	LOW	gcy-18	WBGene00001543	transcript	ZK896.8	protein_coding
IV	12860663	G	[T]	{G, T}	0.0615385	0.984848	TRUE	FALSE	FALSE	0.116398	65	0	4	61	T	synonymous_variant	LOW	gcy-18	WBGene00001543	transcript	ZK896.8	protein_coding
IV	12860666	A	[G]	{G, A}	0.0769231	0.984848	TRUE	FALSE	TRUE	0.143113	65	0	5	60	G	synonymous_variant	LOW	gcy-18	WBGene00001543	transcript	ZK896.8	protein_coding
IV	12860696	T	[C]	{C, T}	0.0615385	0.984848	TRUE	FALSE	TRUE	0.116398	65	0	4	61	C	synonymous_variant	LOW	gcy-18	WBGene00001543	transcript	ZK896.8	protein_coding
IV	12860711	T	[C]	{C, T}	0.0153846	0.984848	TRUE	FALSE	TRUE	0.0305307	65	0	1	64	C	synonymous_variant	LOW	gcy-18	WBGene00001543	transcript	ZK896.8	protein_coding
IV	12860714	T	[A]	{A, T}	0.0769231	0.984848	TRUE	FALSE	FALSE	0.143113	65	0	5	60	A	synonymous_variant	LOW	gcy-18	WBGene00001543	transcript	ZK896.8	protein_coding
IV	12860717	A	[G]	{G, A}	0.0769231	0.984848	TRUE	FALSE	TRUE	0.143113	65	0	5	60	G	synonymous_variant	LOW	gcy-18	WBGene00001543	transcript	ZK896.8	protein_coding
IV	12860720	T	[C]	{C, T}	0.0769231	0.984848	TRUE	FALSE	TRUE	0.143113	65	0	5	60	C	synonymous_variant	LOW	gcy-18	WBGene00001543	transcript	ZK896.8	protein_coding
IV	12861461	C	[A]	{C, A}	0.0151515	1	TRUE	FALSE	FALSE	0.0300717	66	0	1	65	A	splice_region_variant&intron_variant	LOW	gcy-18	WBGene00001543	transcript	ZK896.8	protein_coding
IV	12861462	A	[T]	{A, T}	0.0757576	1	TRUE	FALSE	FALSE	0.141106	66	0	5	61	T	splice_region_variant&intron_variant	LOW	gcy-18	WBGene00001543	transcript	ZK896.8	protein_coding
IV	12861482	C	[T]	{C, T}	0.0757576	1	TRUE	FALSE	TRUE	0.141106	66	0	5	61	T	synonymous_variant	LOW	gcy-18	WBGene00001543	transcript	ZK896.8	protein_coding
IV	12861506	G	[A]	{G, A}	0.0151515	1	TRUE	FALSE	TRUE	0.0300717	66	0	1	65	A	synonymous_variant	LOW	gcy-18	WBGene00001543	transcript	ZK896.8	protein_coding
IV	12861515	A	[G]	{G, A}	0.0151515	1	TRUE	FALSE	TRUE	0.0300717	66	0	1	65	G	synonymous_variant	LOW	gcy-18	WBGene00001543	transcript	ZK896.8	protein_coding
IV	12861527	A	[C]	{C, A}	0.0151515	1	TRUE	FALSE	FALSE	0.0300717	66	0	1	65	C	synonymous_variant	LOW	gcy-18	WBGene00001543	transcript	ZK896.8	protein_coding
IV	12861539	C	[T]	{C, T}	0.0757576	1	TRUE	FALSE	TRUE	0.141106	66	0	5	61	T	synonymous_variant	LOW	gcy-18	WBGene00001543	transcript	ZK896.8	protein_coding
IV	12861542	C	[A]	{C, A}	0.0151515	1	TRUE	FALSE	FALSE	0.0300717	66	0	1	65	A	synonymous_variant	LOW	gcy-18	WBGene00001543	transcript	ZK896.8	protein_coding
IV	12861554	C	[T]	{C, T}	0.0757576	1	TRUE	FALSE	TRUE	0.141106	66	0	5	61	T	synonymous_variant	LOW	gcy-18	WBGene00001543	transcript	ZK896.8	protein_coding
IV	12861573	T	[C, A]	{C, A, T}	0.0606061	1	TRUE	FALSE	FALSE	0.114735	66	0	4	62	A	splice_region_variant&intron_variant	LOW	gcy-18	WBGene00001543	transcript	ZK896.8	protein_coding
IV	12861850	G	[C]	{C, G}	0.0606061	1	TRUE	FALSE	FALSE	0.114735	66	0	4	62	C	splice_region_variant&intron_variant	LOW	gcy-18	WBGene00001543	transcript	ZK896.8	protein_coding
IV	12861859	T	[A]	{A, T}	0.106061	1	TRUE	FALSE	FALSE	0.191071	66	0	7	59	A	synonymous_variant	LOW	gcy-18	WBGene00001543	transcript	ZK896.8	protein_coding
IV	12861868	A	[G]	{G, A}	0.0606061	1	TRUE	FALSE	TRUE	0.114735	66	0	4	62	G	synonymous_variant	LOW	gcy-18	WBGene00001543	transcript	ZK896.8	protein_coding
IV	12861871	C	[T]	{C, T}	0.0151515	1	TRUE	FALSE	TRUE	0.0300717	66	0	1	65	T	synonymous_variant	LOW	gcy-18	WBGene00001543	transcript	ZK896.8	protein_coding
IV	12861886	T	[A]	{A, T}	0.0606061	1	TRUE	FALSE	FALSE	0.114735	66	0	4	62	A	synonymous_variant	LOW	gcy-18	WBGene00001543	transcript	ZK896.8	protein_coding
IV	12861901	A	[T]	{A, T}	0.0606061	1	TRUE	FALSE	FALSE	0.114735	66	0	4	62	T	synonymous_variant	LOW	gcy-18	WBGene00001543	transcript	ZK896.8	protein_coding
IV	12861907	C	[T]	{C, T}	0.0606061	1	TRUE	FALSE	TRUE	0.114735	66	0	4	62	T	synonymous_variant	LOW	gcy-18	WBGene00001543	transcript	ZK896.8	protein_coding
IV	12861925	G	[A]	{G, A}	0.212121	1	TRUE	FALSE	TRUE	0.336803	66	0	14	52	A	synonymous_variant	LOW	gcy-18	WBGene00001543	transcript	ZK896.8	protein_coding
IV	12861964	G	[A]	{G, A}	0.0151515	1	TRUE	FALSE	TRUE	0.0300717	66	0	1	65	A	synonymous_variant	LOW	gcy-18	WBGene00001543	transcript	ZK896.8	protein_coding
IV	12861967	C	[T]	{C, T}	0.0151515	1	TRUE	FALSE	TRUE	0.0300717	66	0	1	65	T	synonymous_variant	LOW	gcy-18	WBGene00001543	transcript	ZK896.8	protein_coding
IV	12861976	A	[G]	{G, A}	0.0606061	1	TRUE	FALSE	TRUE	0.114735	66	0	4	62	G	synonymous_variant	LOW	gcy-18	WBGene00001543	transcript	ZK896.8	protein_coding
IV	12861979	C	[T]	{C, T}	0.0606061	1	TRUE	FALSE	TRUE	0.114735	66	0	4	62	T	synonymous_variant	LOW	gcy-18	WBGene00001543	transcript	ZK896.8	protein_coding
IV	12861994	C	[T]	{C, T}	0.0606061	1	TRUE	FALSE	TRUE	0.114735	66	0	4	62	T	synonymous_variant	LOW	gcy-18	WBGene00001543	transcript	ZK896.8	protein_coding
IV	12861997	G	[A]	{G, A}	0.0606061	1	TRUE	FALSE	TRUE	0.114735	66	0	4	62	A	synonymous_variant	LOW	gcy-18	WBGene00001543	transcript	ZK896.8	protein_coding
IV	12862031	T	[C]	{C, T}	0.0606061	1	TRUE	FALSE	TRUE	0.114735	66	0	4	62	C	splice_region_variant&intron_variant	LOW	gcy-18	WBGene00001543	transcript	ZK896.8	protein_coding
IV	12862088	C	[A]	{C, A}	0.0606061	1	TRUE	FALSE	FALSE	0.114735	66	0	4	62	A	synonymous_variant	LOW	gcy-18	WBGene00001543	transcript	ZK896.8	protein_coding
IV	12862172	A	[T]	{A, T}	0.0606061	1	TRUE	FALSE	FALSE	0.114735	66	0	4	62	T	synonymous_variant	LOW	gcy-18	WBGene00001543	transcript	ZK896.8	protein_coding
IV	12862205	G	[A]	{G, A}	0.0606061	1	TRUE	FALSE	TRUE	0.114735	66	0	4	62	A	synonymous_variant	LOW	gcy-18	WBGene00001543	transcript	ZK896.8	protein_coding
IV	12862208	G	[T]	{G, T}	0.0606061	1	TRUE	FALSE	FALSE	0.114735	66	0	4	62	T	synonymous_variant	LOW	gcy-18	WBGene00001543	transcript	ZK896.8	protein_coding
IV	12862229	G	[A]	{G, A}	0.0757576	1	TRUE	FALSE	TRUE	0.141106	66	0	5	61	A	synonymous_variant	LOW	gcy-18	WBGene00001543	transcript	ZK896.8	protein_coding
IV	12862283	C	[T]	{C, T}	0.0606061	1	TRUE	FALSE	TRUE	0.114735	66	0	4	62	T	synonymous_variant	LOW	gcy-18	WBGene00001543	transcript	ZK896.8	protein_coding
IV	12862286	C	[T]	{C, T}	0.0606061	1	TRUE	FALSE	TRUE	0.114735	66	0	4	62	T	synonymous_variant	LOW	gcy-18	WBGene00001543	transcript	ZK896.8	protein_coding
IV	12862310	T	[C]	{C, T}	0.0606061	1	TRUE	FALSE	TRUE	0.114735	66	0	4	62	C	synonymous_variant	LOW	gcy-18	WBGene00001543	transcript	ZK896.8	protein_coding
IV	12862464	A	[G]	{G, A}	0.0151515	1	TRUE	FALSE	TRUE	0.0300717	66	0	1	65	G	synonymous_variant	LOW	gcy-18	WBGene00001543	transcript	ZK896.8	protein_coding
IV	12862491	T	[C]	{C, T}	0.0606061	1	TRUE	FALSE	TRUE	0.114735	66	0	4	62	C	synonymous_variant	LOW	gcy-18	WBGene00001543	transcript	ZK896.8	protein_coding
IV	12862506	G	[A]	{G, A}	0.0151515	1	TRUE	FALSE	TRUE	0.0300717	66	0	1	65	A	synonymous_variant	LOW	gcy-18	WBGene00001543	transcript	ZK896.8	protein_coding
IV	12862512	T	[C]	{C, T}	0.0606061	1	TRUE	FALSE	TRUE	0.114735	66	0	4	62	C	synonymous_variant	LOW	gcy-18	WBGene00001543	transcript	ZK896.8	protein_coding
IV	12862515	A	[G]	{G, A}	0.0606061	1	TRUE	FALSE	TRUE	0.114735	66	0	4	62	G	synonymous_variant	LOW	gcy-18	WBGene00001543	transcript	ZK896.8	protein_coding
IV	12862896	G	[A]	{G, A}	0.0757576	1	TRUE	FALSE	TRUE	0.141106	66	0	5	61	A	synonymous_variant	LOW	gcy-18	WBGene00001543	transcript	ZK896.8	protein_coding
IV	12862899	A	[T]	{A, T}	0.0757576	1	TRUE	FALSE	FALSE	0.141106	66	0	5	61	T	synonymous_variant	LOW	gcy-18	WBGene00001543	transcript	ZK896.8	protein_coding
IV	12862917	C	[T]	{C, T}	0.0757576	1	TRUE	FALSE	TRUE	0.141106	66	0	5	61	T	synonymous_variant	LOW	gcy-18	WBGene00001543	transcript	ZK896.8	protein_coding
IV	12862944	C	[G]	{C, G}	0.0606061	1	TRUE	FALSE	FALSE	0.114735	66	0	4	62	G	synonymous_variant	LOW	gcy-18	WBGene00001543	transcript	ZK896.8	protein_coding
IV	12862971	G	[A]	{G, A}	0.0606061	1	TRUE	FALSE	TRUE	0.114735	66	0	4	62	A	synonymous_variant	LOW	gcy-18	WBGene00001543	transcript	ZK896.8	protein_coding
IV	12862974	A	[G]	{G, A}	0.0606061	1	TRUE	FALSE	TRUE	0.114735	66	0	4	62	G	synonymous_variant	LOW	gcy-18	WBGene00001543	transcript	ZK896.8	protein_coding
IV	12862992	A	[T]	{A, T}	0.0606061	1	TRUE	FALSE	FALSE	0.114735	66	0	4	62	T	synonymous_variant	LOW	gcy-18	WBGene00001543	transcript	ZK896.8	protein_coding
IV	12863086	A	[G]	{G, A}	0.0606061	1	TRUE	FALSE	TRUE	0.114735	66	0	4	62	G	synonymous_variant	LOW	gcy-18	WBGene00001543	transcript	ZK896.8	protein_coding
IV	12863104	C	[T]	{C, T}	0.0606061	1	TRUE	FALSE	TRUE	0.114735	66	0	4	62	T	synonymous_variant	LOW	gcy-18	WBGene00001543	transcript	ZK896.8	protein_coding
IV	12863125	T	[C]	{C, T}	0.0606061	1	TRUE	FALSE	TRUE	0.114735	66	0	4	62	C	synonymous_variant	LOW	gcy-18	WBGene00001543	transcript	ZK896.8	protein_coding
IV	12863277	T	[C]	{C, T}	0.0606061	1	TRUE	FALSE	TRUE	0.114735	66	0	4	62	C	synonymous_variant	LOW	gcy-18	WBGene00001543	transcript	ZK896.8	protein_coding
IV	12863280	C	[T]	{C, T}	0.0606061	1	TRUE	FALSE	TRUE	0.114735	66	0	4	62	T	synonymous_variant	LOW	gcy-18	WBGene00001543	transcript	ZK896.8	protein_coding
IV	12863305	T	[C]	{C, T}	0.0151515	1	TRUE	FALSE	TRUE	0.0300717	66	0	1	65	C	splice_region_variant&intron_variant	LOW	gcy-18	WBGene00001543	transcript	ZK896.8	protein_coding
IV	12863536	A	[C]	{C, A}	0.0606061	1	TRUE	FALSE	FALSE	0.114735	66	0	4	62	C	splice_region_variant&intron_variant	LOW	gcy-18	WBGene00001543	transcript	ZK896.8	protein_coding
IV	12863548	G	[A]	{G, A}	0.0606061	1	TRUE	FALSE	TRUE	0.114735	66	0	4	62	A	synonymous_variant	LOW	gcy-18	WBGene00001543	transcript	ZK896.8	protein_coding
IV	12863560	G	[A]	{G, A}	0.0606061	1	TRUE	FALSE	TRUE	0.114735	66	0	4	62	A	synonymous_variant	LOW	gcy-18	WBGene00001543	transcript	ZK896.8	protein_coding
IV	12863575	T	[C]	{C, T}	0.0606061	1	TRUE	FALSE	TRUE	0.114735	66	0	4	62	C	synonymous_variant	LOW	gcy-18	WBGene00001543	transcript	ZK896.8	protein_coding
IV	12863588	C	[T]	{C, T}	0.0606061	1	TRUE	FALSE	TRUE	0.114735	66	0	4	62	T	synonymous_variant	LOW	gcy-18	WBGene00001543	transcript	ZK896.8	protein_coding
IV	12863593	G	[A]	{G, A}	0.0757576	1	TRUE	FALSE	TRUE	0.141106	66	0	5	61	A	synonymous_variant	LOW	gcy-18	WBGene00001543	transcript	ZK896.8	protein_coding
IV	12863596	C	[T]	{C, T}	0.0606061	1	TRUE	FALSE	TRUE	0.114735	66	0	4	62	T	synonymous_variant	LOW	gcy-18	WBGene00001543	transcript	ZK896.8	protein_coding
IV	12863617	A	[G]	{G, A}	0.0606061	1	TRUE	FALSE	TRUE	0.114735	66	0	4	62	G	synonymous_variant	LOW	gcy-18	WBGene00001543	transcript	ZK896.8	protein_coding
IV	12863671	T	[G, C]	{C, G, T}	0.0757576	1	TRUE	FALSE	FALSE	0.141106	66	0	5	61	C	synonymous_variant	LOW	gcy-18	WBGene00001543	transcript	ZK896.8	protein_coding
IV	12863689	A	[T]	{A, T}	0.0606061	1	TRUE	FALSE	FALSE	0.114735	66	0	4	62	T	synonymous_variant	LOW	gcy-18	WBGene00001543	transcript	ZK896.8	protein_coding
IV	12863701	C	[T]	{C, T}	0.0606061	1	TRUE	FALSE	TRUE	0.114735	66	0	4	62	T	synonymous_variant	LOW	gcy-18	WBGene00001543	transcript	ZK896.8	protein_coding
IV	12863704	C	[G]	{C, G}	0.0151515	1	TRUE	FALSE	FALSE	0.0300717	66	0	1	65	G	synonymous_variant	LOW	gcy-18	WBGene00001543	transcript	ZK896.8	protein_coding
IV	12863707	C	[T]	{C, T}	0.0606061	1	TRUE	FALSE	TRUE	0.114735	66	0	4	62	T	synonymous_variant	LOW	gcy-18	WBGene00001543	transcript	ZK896.8	protein_coding
IV	12863713	C	[A]	{C, A}	0.0606061	1	TRUE	FALSE	FALSE	0.114735	66	0	4	62	A	synonymous_variant	LOW	gcy-18	WBGene00001543	transcript	ZK896.8	protein_coding
IV	12863716	T	[C]	{C, T}	0.0606061	1	TRUE	FALSE	TRUE	0.114735	66	0	4	62	C	synonymous_variant	LOW	gcy-18	WBGene00001543	transcript	ZK896.8	protein_coding
IV	12863722	T	[C]	{C, T}	0.0606061	1	TRUE	FALSE	TRUE	0.114735	66	0	4	62	C	synonymous_variant	LOW	gcy-18	WBGene00001543	transcript	ZK896.8	protein_coding
IV	12863749	T	[C]	{C, T}	0.0606061	1	TRUE	FALSE	TRUE	0.114735	66	0	4	62	C	synonymous_variant	LOW	gcy-18	WBGene00001543	transcript	ZK896.8	protein_coding
IV	12863752	A	[C]	{C, A}	0.0606061	1	TRUE	FALSE	FALSE	0.114735	66	0	4	62	C	synonymous_variant	LOW	gcy-18	WBGene00001543	transcript	ZK896.8	protein_coding
IV	12863767	G	[A]	{G, A}	0.0606061	1	TRUE	FALSE	TRUE	0.114735	66	0	4	62	A	synonymous_variant	LOW	gcy-18	WBGene00001543	transcript	ZK896.8	protein_coding
IV	12863771	C	[T]	{C, T}	0.0606061	1	TRUE	FALSE	TRUE	0.114735	66	0	4	62	T	synonymous_variant	LOW	gcy-18	WBGene00001543	transcript	ZK896.8	protein_coding
IV	12863809	T	[C]	{C, T}	0.0606061	1	TRUE	FALSE	TRUE	0.114735	66	0	4	62	C	synonymous_variant	LOW	gcy-18	WBGene00001543	transcript	ZK896.8	protein_coding
IV	12863812	A	[G]	{G, A}	0.0606061	1	TRUE	FALSE	TRUE	0.114735	66	0	4	62	G	synonymous_variant	LOW	gcy-18	WBGene00001543	transcript	ZK896.8	protein_coding
IV	12864157	C	[G, T]	{C, G, T}	0.0757576	1	TRUE	FALSE	FALSE	0.141106	66	0	5	61	G	synonymous_variant	LOW	gcy-18	WBGene00001543	transcript	ZK896.8	protein_coding
IV	12864166	A	[T]	{A, T}	0.0606061	1	TRUE	FALSE	FALSE	0.114735	66	0	4	62	T	synonymous_variant	LOW	gcy-18	WBGene00001543	transcript	ZK896.8	protein_coding
IV	12864185	C	[A]	{C, A}	0.0606061	1	TRUE	FALSE	FALSE	0.114735	66	0	4	62	A	synonymous_variant	LOW	gcy-18	WBGene00001543	transcript	ZK896.8	protein_coding
IV	12864223	T	[C]	{C, T}	0.0606061	1	TRUE	FALSE	TRUE	0.114735	66	0	4	62	C	synonymous_variant	LOW	gcy-18	WBGene00001543	transcript	ZK896.8	protein_coding
IV	12864256	T	[C]	{C, T}	0.0606061	1	TRUE	FALSE	TRUE	0.114735	66	0	4	62	C	synonymous_variant	LOW	gcy-18	WBGene00001543	transcript	ZK896.8	protein_coding
IV	12864259	T	[C]	{C, T}	0.0606061	1	TRUE	FALSE	TRUE	0.114735	66	0	4	62	C	synonymous_variant	LOW	gcy-18	WBGene00001543	transcript	ZK896.8	protein_coding
IV	12864265	T	[C]	{C, T}	0.0606061	1	TRUE	FALSE	TRUE	0.114735	66	0	4	62	C	synonymous_variant	LOW	gcy-18	WBGene00001543	transcript	ZK896.8	protein_coding
IV	12864268	T	[A]	{A, T}	0.0606061	1	TRUE	FALSE	FALSE	0.114735	66	0	4	62	A	synonymous_variant	LOW	gcy-18	WBGene00001543	transcript	ZK896.8	protein_coding
IV	12864271	T	[G]	{G, T}	0.0606061	1	TRUE	FALSE	FALSE	0.114735	66	0	4	62	G	synonymous_variant	LOW	gcy-18	WBGene00001543	transcript	ZK896.8	protein_coding
IV	12864318	A	[G]	{G, A}	0.0606061	1	TRUE	FALSE	TRUE	0.114735	66	0	4	62	G	splice_region_variant&intron_variant	LOW	gcy-18	WBGene00001543	transcript	ZK896.8	protein_coding
IV	12864354	T	[A]	{A, T}	0.0606061	1	TRUE	FALSE	FALSE	0.114735	66	0	4	62	A	splice_region_variant&intron_variant	LOW	gcy-18	WBGene00001543	transcript	ZK896.8	protein_coding
IV	12864371	T	[C]	{C, T}	0.0606061	1	TRUE	FALSE	TRUE	0.114735	66	0	4	62	C	synonymous_variant	LOW	gcy-18	WBGene00001543	transcript	ZK896.8	protein_coding
IV	12864387	C	[T]	{C, T}	0.0606061	1	TRUE	FALSE	TRUE	0.114735	66	0	4	62	T	synonymous_variant	LOW	gcy-18	WBGene00001543	transcript	ZK896.8	protein_coding
IV	12864401	A	[G]	{G, A}	0.0606061	1	TRUE	FALSE	TRUE	0.114735	66	0	4	62	G	synonymous_variant	LOW	gcy-18	WBGene00001543	transcript	ZK896.8	protein_coding
IV	12864440	G	[A]	{G, A}	0.0757576	1	TRUE	FALSE	TRUE	0.141106	66	0	5	61	A	synonymous_variant	LOW	gcy-18	WBGene00001543	transcript	ZK896.8	protein_coding
IV	12864443	A	[G]	{G, A}	0.0757576	1	TRUE	FALSE	TRUE	0.141106	66	0	5	61	G	synonymous_variant	LOW	gcy-18	WBGene00001543	transcript	ZK896.8	protein_coding
IV	12864446	A	[G]	{G, A}	0.0606061	1	TRUE	FALSE	TRUE	0.114735	66	0	4	62	G	synonymous_variant	LOW	gcy-18	WBGene00001543	transcript	ZK896.8	protein_coding
IV	12864470	T	[C]	{C, T}	0.0606061	1	TRUE	FALSE	TRUE	0.114735	66	0	4	62	C	synonymous_variant	LOW	gcy-18	WBGene00001543	transcript	ZK896.8	protein_coding
IV	12864476	T	[C]	{C, T}	0.0606061	1	TRUE	FALSE	TRUE	0.114735	66	0	4	62	C	synonymous_variant	LOW	gcy-18	WBGene00001543	transcript	ZK896.8	protein_coding
IV	12864479	G	[A]	{G, A}	0.0606061	1	TRUE	FALSE	TRUE	0.114735	66	0	4	62	A	synonymous_variant	LOW	gcy-18	WBGene00001543	transcript	ZK896.8	protein_coding
IV	12864482	C	[T]	{C, T}	0.0606061	1	TRUE	FALSE	TRUE	0.114735	66	0	4	62	T	synonymous_variant	LOW	gcy-18	WBGene00001543	transcript	ZK896.8	protein_coding
IV	12864485	G	[A]	{G, A}	0.0606061	1	TRUE	FALSE	TRUE	0.114735	66	0	4	62	A	synonymous_variant	LOW	gcy-18	WBGene00001543	transcript	ZK896.8	protein_coding
IV	12864504	C	[T]	{C, T}	0.0606061	1	TRUE	FALSE	TRUE	0.114735	66	0	4	62	T	synonymous_variant	LOW	gcy-18	WBGene00001543	transcript	ZK896.8	protein_coding
IV	12864552	G	[A]	{G, A}	0.0681818	1	TRUE	FALSE	TRUE	0.128036	66	1	4	61	A	splice_region_variant&intron_variant	LOW	gcy-18	WBGene00001543	transcript	ZK896.8	protein_coding
IV	12864614	A	[G]	{G, A}	0.0757576	1	TRUE	FALSE	TRUE	0.141106	66	0	5	61	G	synonymous_variant	LOW	gcy-18	WBGene00001543	transcript	ZK896.8	protein_coding
IV	12864641	G	[A]	{G, A}	0.0151515	1	TRUE	FALSE	TRUE	0.0300717	66	0	1	65	A	synonymous_variant	LOW	gcy-18	WBGene00001543	transcript	ZK896.8	protein_coding
IV	12864680	C	[T]	{C, T}	0.0151515	1	TRUE	FALSE	TRUE	0.0300717	66	0	1	65	T	synonymous_variant	LOW	gcy-18	WBGene00001543	transcript	ZK896.8	protein_coding
IV	12864687	C	[T]	{C, T}	0.0151515	1	TRUE	FALSE	TRUE	0.0300717	66	0	1	65	T	synonymous_variant	LOW	gcy-18	WBGene00001543	transcript	ZK896.8	protein_coding
IV	12864689	G	[A]	{G, A}	0.0151515	1	TRUE	FALSE	TRUE	0.0300717	66	0	1	65	A	synonymous_variant	LOW	gcy-18	WBGene00001543	transcript	ZK896.8	protein_coding
IV	12864707	G	[A]	{G, A}	0.0606061	1	TRUE	FALSE	TRUE	0.114735	66	0	4	62	A	synonymous_variant	LOW	gcy-18	WBGene00001543	transcript	ZK896.8	protein_coding
IV	12864722	G	[A]	{G, A}	0.0606061	1	TRUE	FALSE	TRUE	0.114735	66	0	4	62	A	synonymous_variant	LOW	gcy-18	WBGene00001543	transcript	ZK896.8	protein_coding
IV	12864728	G	[A]	{G, A}	0.0606061	1	TRUE	FALSE	TRUE	0.114735	66	0	4	62	A	synonymous_variant	LOW	gcy-18	WBGene00001543	transcript	ZK896.8	protein_coding
IV	12864731	T	[C]	{C, T}	0.0151515	1	TRUE	FALSE	TRUE	0.0300717	66	0	1	65	C	synonymous_variant	LOW	gcy-18	WBGene00001543	transcript	ZK896.8	protein_coding
IV	12864764	G	[A]	{G, A}	0.0151515	1	TRUE	FALSE	TRUE	0.0300717	66	0	1	65	A	synonymous_variant	LOW	gcy-18	WBGene00001543	transcript	ZK896.8	protein_coding
IV	12864831	C	[G]	{C, G}	0.0606061	1	TRUE	FALSE	FALSE	0.114735	66	0	4	62	G	synonymous_variant	LOW	gcy-18	WBGene00001543	transcript	ZK896.8	protein_coding
IV	12864834	T	[A]	{A, T}	0.0606061	1	TRUE	FALSE	FALSE	0.114735	66	0	4	62	A	synonymous_variant	LOW	gcy-18	WBGene00001543	transcript	ZK896.8	protein_coding
IV	12864837	T	[C]	{C, T}	0.0151515	1	TRUE	FALSE	TRUE	0.0300717	66	0	1	65	C	synonymous_variant	LOW	gcy-18	WBGene00001543	transcript	ZK896.8	protein_coding
IV	12864891	T	[G]	{G, T}	0.0606061	1	TRUE	FALSE	FALSE	0.114735	66	0	4	62	G	synonymous_variant	LOW	gcy-18	WBGene00001543	transcript	ZK896.8	protein_coding
IV	12864918	C	[T]	{C, T}	0.0606061	1	TRUE	FALSE	TRUE	0.114735	66	0	4	62	T	synonymous_variant	LOW	gcy-18	WBGene00001543	transcript	ZK896.8	protein_coding
IV	12864927	T	[A]	{A, T}	0.0606061	1	TRUE	FALSE	FALSE	0.114735	66	0	4	62	A	synonymous_variant	LOW	gcy-18	WBGene00001543	transcript	ZK896.8	protein_coding
IV	12864936	A	[G]	{G, A}	0.0151515	1	TRUE	FALSE	TRUE	0.0300717	66	0	1	65	G	synonymous_variant	LOW	gcy-18	WBGene00001543	transcript	ZK896.8	protein_coding
IV	12864945	C	[T]	{C, T}	0.0606061	1	TRUE	FALSE	TRUE	0.114735	66	0	4	62	T	synonymous_variant	LOW	gcy-18	WBGene00001543	transcript	ZK896.8	protein_coding
IV	12864957	A	[C]	{C, A}	0.0606061	1	TRUE	FALSE	FALSE	0.114735	66	0	4	62	C	synonymous_variant	LOW	gcy-18	WBGene00001543	transcript	ZK896.8	protein_coding
IV	12865011	T	[C]	{C, T}	0.0606061	1	TRUE	FALSE	TRUE	0.114735	66	0	4	62	C	synonymous_variant	LOW	gcy-18	WBGene00001543	transcript	ZK896.8	protein_coding
IV	12865029	A	[C]	{C, A}	0.0606061	1	TRUE	FALSE	FALSE	0.114735	66	0	4	62	C	synonymous_variant	LOW	gcy-18	WBGene00001543	transcript	ZK896.8	protein_coding
IV	12865032	C	[T]	{C, T}	0.0606061	1	TRUE	FALSE	TRUE	0.114735	66	0	4	62	T	synonymous_variant	LOW	gcy-18	WBGene00001543	transcript	ZK896.8	protein_coding
IV	12865035	A	[G]	{G, A}	0.0606061	1	TRUE	FALSE	TRUE	0.114735	66	0	4	62	G	synonymous_variant	LOW	gcy-18	WBGene00001543	transcript	ZK896.8	protein_coding
IV	12865071	A	[T]	{A, T}	0.0606061	1	TRUE	FALSE	FALSE	0.114735	66	0	4	62	T	synonymous_variant	LOW	gcy-18	WBGene00001543	transcript	ZK896.8	protein_coding
IV	12865098	T	[C]	{C, T}	0.0757576	1	TRUE	FALSE	TRUE	0.141106	66	0	5	61	C	synonymous_variant	LOW	gcy-18	WBGene00001543	transcript	ZK896.8	protein_coding
IV	12865105	C	[T]	{C, T}	0.0757576	1	TRUE	FALSE	TRUE	0.141106	66	0	5	61	T	synonymous_variant	LOW	gcy-18	WBGene00001543	transcript	ZK896.8	protein_coding
IV	12865131	A	[C]	{C, A}	0.0151515	1	TRUE	FALSE	FALSE	0.0300717	66	0	1	65	C	synonymous_variant	LOW	gcy-18	WBGene00001543	transcript	ZK896.8	protein_coding
IV	12865137	G	[A]	{G, A}	0.0151515	1	TRUE	FALSE	TRUE	0.0300717	66	0	1	65	A	synonymous_variant	LOW	gcy-18	WBGene00001543	transcript	ZK896.8	protein_coding
IV	12865140	T	[C]	{C, T}	0.0757576	1	TRUE	FALSE	TRUE	0.141106	66	0	5	61	C	synonymous_variant	LOW	gcy-18	WBGene00001543	transcript	ZK896.8	protein_coding
IV	12865155	G	[T]	{G, T}	0.0151515	1	TRUE	FALSE	FALSE	0.0300717	66	0	1	65	T	synonymous_variant	LOW	gcy-18	WBGene00001543	transcript	ZK896.8	protein_coding
IV	12865188	T	[C]	{C, T}	0.0757576	1	TRUE	FALSE	TRUE	0.141106	66	0	5	61	C	synonymous_variant	LOW	gcy-18	WBGene00001543	transcript	ZK896.8	protein_coding
IV	12865242	A	[C]	{C, A}	0.0757576	1	TRUE	FALSE	FALSE	0.141106	66	0	5	61	C	synonymous_variant	LOW	gcy-18	WBGene00001543	transcript	ZK896.8	protein_coding
IV	12865272	T	[C]	{C, T}	0.0606061	1	TRUE	FALSE	TRUE	0.114735	66	0	4	62	C	synonymous_variant	LOW	gcy-18	WBGene00001543	transcript	ZK896.8	protein_coding
IV	12865293	C	[T]	{C, T}	0.0757576	1	TRUE	FALSE	TRUE	0.141106	66	0	5	61	T	synonymous_variant	LOW	gcy-18	WBGene00001543	transcript	ZK896.8	protein_coding
IV	12865305	T	[C]	{C, T}	0.0606061	1	TRUE	FALSE	TRUE	0.114735	66	0	4	62	C	synonymous_variant	LOW	gcy-18	WBGene00001543	transcript	ZK896.8	protein_coding
IV	12865347	C	[T]	{C, T}	0.0757576	1	TRUE	FALSE	TRUE	0.141106	66	0	5	61	T	synonymous_variant	LOW	gcy-18	WBGene00001543	transcript	ZK896.8	protein_coding
IV	12865371	T	[C]	{C, T}	0.0606061	1	TRUE	FALSE	TRUE	0.114735	66	0	4	62	C	synonymous_variant	LOW	gcy-18	WBGene00001543	transcript	ZK896.8	protein_coding
IV	12865374	T	[C]	{C, T}	0.0606061	1	TRUE	FALSE	TRUE	0.114735	66	0	4	62	C	synonymous_variant	LOW	gcy-18	WBGene00001543	transcript	ZK896.8	protein_coding
IV	12865401	G	[A]	{G, A}	0.0606061	1	TRUE	FALSE	TRUE	0.114735	66	0	4	62	A	synonymous_variant	LOW	gcy-18	WBGene00001543	transcript	ZK896.8	protein_coding
IV	12865404	A	[G]	{G, A}	0.0757576	1	TRUE	FALSE	TRUE	0.141106	66	0	5	61	G	synonymous_variant	LOW	gcy-18	WBGene00001543	transcript	ZK896.8	protein_coding
IV	12865428	T	[C]	{C, T}	0.0606061	1	TRUE	FALSE	TRUE	0.114735	66	0	4	62	C	synonymous_variant	LOW	gcy-18	WBGene00001543	transcript	ZK896.8	protein_coding
IV	12865446	T	[C]	{C, T}	0.0606061	1	TRUE	FALSE	TRUE	0.114735	66	0	4	62	C	synonymous_variant	LOW	gcy-18	WBGene00001543	transcript	ZK896.8	protein_coding
IV	12865485	G	[T]	{G, T}	0.121212	1	TRUE	FALSE	FALSE	0.214666	66	0	8	58	T	synonymous_variant	LOW	gcy-18	WBGene00001543	transcript	ZK896.8	protein_coding
IV	12865488	T	[C]	{C, T}	0.0151515	1	TRUE	FALSE	TRUE	0.0300717	66	0	1	65	C	synonymous_variant	LOW	gcy-18	WBGene00001543	transcript	ZK896.8	protein_coding
IV	12865509	G	[A]	{G, A}	0.0606061	1	TRUE	FALSE	TRUE	0.114735	66	0	4	62	A	synonymous_variant	LOW	gcy-18	WBGene00001543	transcript	ZK896.8	protein_coding
IV	12865518	G	[A]	{G, A}	0.0606061	1	TRUE	FALSE	TRUE	0.114735	66	0	4	62	A	synonymous_variant	LOW	gcy-18	WBGene00001543	transcript	ZK896.8	protein_coding
IV	12865530	C	[T]	{C, T}	0.0606061	1	TRUE	FALSE	TRUE	0.114735	66	0	4	62	T	synonymous_variant	LOW	gcy-18	WBGene00001543	transcript	ZK896.8	protein_coding
IV	12865545	C	[T]	{C, T}	0.0606061	1	TRUE	FALSE	TRUE	0.114735	66	0	4	62	T	synonymous_variant	LOW	gcy-18	WBGene00001543	transcript	ZK896.8	protein_coding
IV	12865554	G	[A]	{G, A}	0.0606061	1	TRUE	FALSE	TRUE	0.114735	66	0	4	62	A	synonymous_variant	LOW	gcy-18	WBGene00001543	transcript	ZK896.8	protein_coding
IV	12865593	G	[A]	{G, A}	0.0606061	1	TRUE	FALSE	TRUE	0.114735	66	0	4	62	A	synonymous_variant	LOW	gcy-18	WBGene00001543	transcript	ZK896.8	protein_coding
IV	12866202	G	[A, C]	{C, G, A}	0.0757576	1	TRUE	FALSE	FALSE	0.141106	66	0	5	61	A	synonymous_variant	LOW	clec-186	WBGene00014138	transcript	ZK896.7	protein_coding
IV	12866217	G	[C]	{C, G}	0.0757576	1	TRUE	FALSE	FALSE	0.141106	66	0	5	61	C	synonymous_variant	LOW	clec-186	WBGene00014138	transcript	ZK896.7	protein_coding
IV	12866223	C	[T]	{C, T}	0.0606061	1	TRUE	FALSE	TRUE	0.114735	66	0	4	62	T	synonymous_variant	LOW	clec-186	WBGene00014138	transcript	ZK896.7	protein_coding
IV	12866260	A	[G]	{G, A}	0.0757576	1	TRUE	FALSE	TRUE	0.141106	66	0	5	61	G	splice_region_variant&intron_variant	LOW	clec-186	WBGene00014138	transcript	ZK896.7	protein_coding
IV	12866787	T	[A]	{A, T}	0.0606061	1	TRUE	FALSE	FALSE	0.114735	66	0	4	62	A	splice_region_variant&intron_variant	LOW	clec-186	WBGene00014138	transcript	ZK896.7	protein_coding
IV	12867115	C	[T]	{C, T}	0.0606061	1	TRUE	FALSE	TRUE	0.114735	66	0	4	62	T	synonymous_variant	LOW	clec-186	WBGene00014138	transcript	ZK896.7	protein_coding
IV	12867196	G	[A]	{G, A}	0.0606061	1	TRUE	FALSE	TRUE	0.114735	66	0	4	62	A	synonymous_variant	LOW	clec-186	WBGene00014138	transcript	ZK896.7	protein_coding
IV	12867220	C	[T]	{C, T}	0.0606061	1	TRUE	FALSE	TRUE	0.114735	66	0	4	62	T	synonymous_variant	LOW	clec-186	WBGene00014138	transcript	ZK896.7	protein_coding
IV	12867241	A	[G]	{G, A}	0.0606061	1	TRUE	FALSE	TRUE	0.114735	66	0	4	62	G	synonymous_variant	LOW	clec-186	WBGene00014138	transcript	ZK896.7	protein_coding
IV	12867262	C	[T]	{C, T}	0.0606061	1	TRUE	FALSE	TRUE	0.114735	66	0	4	62	T	synonymous_variant	LOW	clec-186	WBGene00014138	transcript	ZK896.7	protein_coding
IV	12867385	T	[C]	{C, T}	0.212121	1	TRUE	FALSE	TRUE	0.336803	66	0	14	52	C	synonymous_variant	LOW	clec-186	WBGene00014138	transcript	ZK896.7	protein_coding
IV	12867391	T	[A]	{A, T}	0.0606061	1	TRUE	FALSE	FALSE	0.114735	66	0	4	62	A	synonymous_variant	LOW	clec-186	WBGene00014138	transcript	ZK896.7	protein_coding
IV	12867406	G	[T]	{G, T}	0.0606061	1	TRUE	FALSE	FALSE	0.114735	66	0	4	62	T	synonymous_variant	LOW	clec-186	WBGene00014138	transcript	ZK896.7	protein_coding
IV	12867410	A	[C]	{C, A}	0.0606061	1	TRUE	FALSE	FALSE	0.114735	66	0	4	62	C	synonymous_variant	LOW	clec-186	WBGene00014138	transcript	ZK896.7	protein_coding
IV	12867412	G	[A]	{G, A}	0.0606061	1	TRUE	FALSE	TRUE	0.114735	66	0	4	62	A	synonymous_variant	LOW	clec-186	WBGene00014138	transcript	ZK896.7	protein_coding
IV	12867451	A	[G]	{G, A}	0.0606061	1	TRUE	FALSE	TRUE	0.114735	66	0	4	62	G	synonymous_variant	LOW	clec-186	WBGene00014138	transcript	ZK896.7	protein_coding
IV	12867463	T	[C]	{C, T}	0.0151515	1	TRUE	FALSE	TRUE	0.0300717	66	0	1	65	C	synonymous_variant	LOW	clec-186	WBGene00014138	transcript	ZK896.7	protein_coding
IV	12867469	T	[A]	{A, T}	0.0606061	1	TRUE	FALSE	FALSE	0.114735	66	0	4	62	A	synonymous_variant	LOW	clec-186	WBGene00014138	transcript	ZK896.7	protein_coding
IV	12867502	A	[G]	{G, A}	0.0606061	1	TRUE	FALSE	TRUE	0.114735	66	0	4	62	G	synonymous_variant	LOW	clec-186	WBGene00014138	transcript	ZK896.7	protein_coding
IV	12867532	C	[T]	{C, T}	0.0606061	1	TRUE	FALSE	TRUE	0.114735	66	0	4	62	T	synonymous_variant	LOW	clec-186	WBGene00014138	transcript	ZK896.7	protein_coding
IV	12867547	T	[G]	{G, T}	0.0606061	1	TRUE	FALSE	FALSE	0.114735	66	0	4	62	G	synonymous_variant	LOW	clec-186	WBGene00014138	transcript	ZK896.7	protein_coding
IV	12867568	T	[G]	{G, T}	0.0606061	1	TRUE	FALSE	FALSE	0.114735	66	0	4	62	G	splice_region_variant&synonymous_variant	LOW	clec-186	WBGene00014138	transcript	ZK896.7	protein_coding
IV	12867693	C	[T]	{C, T}	0.0606061	1	TRUE	FALSE	TRUE	0.114735	66	0	4	62	T	synonymous_variant	LOW	clec-186	WBGene00014138	transcript	ZK896.7	protein_coding
IV	12867711	T	[C]	{C, T}	0.0606061	1	TRUE	FALSE	TRUE	0.114735	66	0	4	62	C	synonymous_variant	LOW	clec-186	WBGene00014138	transcript	ZK896.7	protein_coding
IV	12867790	A	[C]	{C, A}	0.0606061	1	TRUE	FALSE	FALSE	0.114735	66	0	4	62	C	synonymous_variant	LOW	clec-186	WBGene00014138	transcript	ZK896.7	protein_coding
IV	12867796	G	[A]	{G, A}	0.0606061	1	TRUE	FALSE	TRUE	0.114735	66	0	4	62	A	synonymous_variant	LOW	clec-186	WBGene00014138	transcript	ZK896.7	protein_coding
IV	12867853	C	[T]	{C, T}	0.0606061	1	TRUE	FALSE	TRUE	0.114735	66	0	4	62	T	synonymous_variant	LOW	clec-186	WBGene00014138	transcript	ZK896.7	protein_coding
IV	12868707	C	[T]	{C, T}	0.0909091	1	TRUE	FALSE	TRUE	0.166551	66	0	6	60	T	splice_region_variant&intron_variant	LOW	clec-186	WBGene00014138	transcript	ZK896.7	protein_coding
IV	12868732	T	[C]	{C, T}	0.151515	1	TRUE	FALSE	TRUE	0.259079	66	0	10	56	C	synonymous_variant	LOW	clec-186	WBGene00014138	transcript	ZK896.7	protein_coding
IV	12868738	A	[T]	{A, T}	0.0909091	1	TRUE	FALSE	FALSE	0.166551	66	0	6	60	T	synonymous_variant	LOW	clec-186	WBGene00014138	transcript	ZK896.7	protein_coding
IV	12868878	G	[T]	{G, T}	0.0909091	1	TRUE	FALSE	FALSE	0.166551	66	0	6	60	T	splice_region_variant&intron_variant	LOW	clec-186	WBGene00014138	transcript	ZK896.7	protein_coding
IV	12868915	T	[A]	{A, T}	0.0909091	1	TRUE	FALSE	FALSE	0.166551	66	0	6	60	A	splice_region_variant&intron_variant	LOW	clec-186	WBGene00014138	transcript	ZK896.7	protein_coding
IV	12868917	C	[T]	{C, T}	0.0909091	1	TRUE	FALSE	TRUE	0.166551	66	0	6	60	T	splice_region_variant&intron_variant	LOW	clec-186	WBGene00014138	transcript	ZK896.7	protein_coding
IV	12868929	G	[C]	{C, G}	0.0909091	1	TRUE	FALSE	FALSE	0.166551	66	0	6	60	C	synonymous_variant	LOW	clec-186	WBGene00014138	transcript	ZK896.7	protein_coding
IV	12868956	T	[C]	{C, T}	0.0757576	1	TRUE	FALSE	TRUE	0.141106	66	0	5	61	C	synonymous_variant	LOW	clec-186	WBGene00014138	transcript	ZK896.7	protein_coding
IV	12868968	C	[T]	{C, T}	0.0909091	1	TRUE	FALSE	TRUE	0.166551	66	0	6	60	T	synonymous_variant	LOW	clec-186	WBGene00014138	transcript	ZK896.7	protein_coding
IV	12868974	A	[G]	{G, A}	0.0151515	1	TRUE	FALSE	TRUE	0.0300717	66	0	1	65	G	synonymous_variant	LOW	clec-186	WBGene00014138	transcript	ZK896.7	protein_coding
IV	12868980	T	[C]	{C, T}	0.0151515	1	TRUE	FALSE	TRUE	0.0300717	66	0	1	65	C	synonymous_variant	LOW	clec-186	WBGene00014138	transcript	ZK896.7	protein_coding
IV	12869425	T	[C]	{C, T}	0.0909091	1	TRUE	FALSE	TRUE	0.166551	66	0	6	60	C	synonymous_variant	LOW	clec-187	WBGene00014137	transcript	ZK896.6	protein_coding
IV	12869539	C	[G]	{C, G}	0.0909091	1	TRUE	FALSE	FALSE	0.166551	66	0	6	60	G	synonymous_variant	LOW	clec-187	WBGene00014137	transcript	ZK896.6	protein_coding
IV	12869671	G	[A]	{G, A}	0.0909091	1	TRUE	FALSE	TRUE	0.166551	66	0	6	60	A	synonymous_variant	LOW	clec-187	WBGene00014137	transcript	ZK896.6	protein_coding
IV	12869674	A	[G]	{G, A}	0.0909091	1	TRUE	FALSE	TRUE	0.166551	66	0	6	60	G	synonymous_variant	LOW	clec-187	WBGene00014137	transcript	ZK896.6	protein_coding
IV	12869685	A	[G]	{G, A}	0.0909091	1	TRUE	FALSE	TRUE	0.166551	66	0	6	60	G	synonymous_variant	LOW	clec-187	WBGene00014137	transcript	ZK896.6	protein_coding
IV	12869740	C	[A]	{C, A}	0.0909091	1	TRUE	FALSE	FALSE	0.166551	66	0	6	60	A	synonymous_variant	LOW	clec-187	WBGene00014137	transcript	ZK896.6	protein_coding
IV	12869838	T	[A]	{A, T}	0.0909091	1	TRUE	FALSE	FALSE	0.166551	66	0	6	60	A	synonymous_variant	LOW	clec-187	WBGene00014137	transcript	ZK896.6	protein_coding
IV	12869841	T	[A]	{A, T}	0.0909091	1	TRUE	FALSE	FALSE	0.166551	66	0	6	60	A	synonymous_variant	LOW	clec-187	WBGene00014137	transcript	ZK896.6	protein_coding
IV	12870158	T	[C]	{C, T}	0.0909091	1	TRUE	FALSE	TRUE	0.166551	66	0	6	60	C	synonymous_variant	LOW	clec-187	WBGene00014137	transcript	ZK896.6	protein_coding
IV	12870185	C	[T]	{C, T}	0.0909091	1	TRUE	FALSE	TRUE	0.166551	66	0	6	60	T	synonymous_variant	LOW	clec-187	WBGene00014137	transcript	ZK896.6	protein_coding
IV	12870188	T	[C]	{C, T}	0.0909091	1	TRUE	FALSE	TRUE	0.166551	66	0	6	60	C	synonymous_variant	LOW	clec-187	WBGene00014137	transcript	ZK896.6	protein_coding
IV	12870209	C	[T]	{C, T}	0.0909091	1	TRUE	FALSE	TRUE	0.166551	66	0	6	60	T	synonymous_variant	LOW	clec-187	WBGene00014137	transcript	ZK896.6	protein_coding
IV	12870257	T	[C]	{C, T}	0.0909091	1	TRUE	FALSE	TRUE	0.166551	66	0	6	60	C	synonymous_variant	LOW	clec-187	WBGene00014137	transcript	ZK896.6	protein_coding
IV	12870269	G	[A]	{G, A}	0.0909091	1	TRUE	FALSE	TRUE	0.166551	66	0	6	60	A	synonymous_variant	LOW	clec-187	WBGene00014137	transcript	ZK896.6	protein_coding
IV	12870404	G	[A]	{G, A}	0.0909091	1	TRUE	FALSE	TRUE	0.166551	66	0	6	60	A	synonymous_variant	LOW	clec-187	WBGene00014137	transcript	ZK896.6	protein_coding
IV	12871209	C	[A]	{C, A}	0.0909091	1	TRUE	FALSE	FALSE	0.166551	66	0	6	60	A	splice_region_variant&intron_variant	LOW	clec-187	WBGene00014137	transcript	ZK896.6	protein_coding
IV	12871241	G	[T]	{G, T}	0.0909091	1	TRUE	FALSE	FALSE	0.166551	66	0	6	60	T	synonymous_variant	LOW	clec-187	WBGene00014137	transcript	ZK896.6	protein_coding
IV	12871286	C	[T]	{C, T}	0.0151515	1	TRUE	FALSE	TRUE	0.0300717	66	0	1	65	T	synonymous_variant	LOW	clec-187	WBGene00014137	transcript	ZK896.6	protein_coding
IV	12871301	T	[C]	{C, T}	0.0909091	1	TRUE	FALSE	TRUE	0.166551	66	0	6	60	C	synonymous_variant	LOW	clec-187	WBGene00014137	transcript	ZK896.6	protein_coding
IV	12871316	G	[A]	{G, A}	0.0909091	1	TRUE	FALSE	TRUE	0.166551	66	0	6	60	A	synonymous_variant	LOW	clec-187	WBGene00014137	transcript	ZK896.6	protein_coding
IV	12871322	T	[C]	{C, T}	0.0909091	1	TRUE	FALSE	TRUE	0.166551	66	0	6	60	C	synonymous_variant	LOW	clec-187	WBGene00014137	transcript	ZK896.6	protein_coding
IV	12872850	G	[A]	{G, A}	0.0909091	1	TRUE	FALSE	TRUE	0.166551	66	0	6	60	A	synonymous_variant	LOW	ZK896.1	WBGene00014132	transcript	ZK896.1	protein_coding
IV	12872859	A	[G]	{G, A}	0.0909091	1	TRUE	FALSE	TRUE	0.166551	66	0	6	60	G	synonymous_variant	LOW	ZK896.1	WBGene00014132	transcript	ZK896.1	protein_coding
IV	12872865	C	[T]	{C, T}	0.0151515	1	TRUE	FALSE	TRUE	0.0300717	66	0	1	65	T	synonymous_variant	LOW	ZK896.1	WBGene00014132	transcript	ZK896.1	protein_coding
IV	12873118	C	[T]	{C, T}	0.0909091	1	TRUE	FALSE	TRUE	0.166551	66	0	6	60	T	splice_region_variant&intron_variant	LOW	ZK896.1	WBGene00014132	transcript	ZK896.1	protein_coding
IV	12873159	A	[T]	{A, T}	0.0909091	1	TRUE	FALSE	FALSE	0.166551	66	0	6	60	T	synonymous_variant	LOW	ZK896.1	WBGene00014132	transcript	ZK896.1	protein_coding
IV	12873201	C	[T]	{C, T}	0.0909091	1	TRUE	FALSE	TRUE	0.166551	66	0	6	60	T	synonymous_variant	LOW	ZK896.1	WBGene00014132	transcript	ZK896.1	protein_coding
IV	12873270	A	[T]	{A, T}	0.0909091	1	TRUE	FALSE	FALSE	0.166551	66	0	6	60	T	synonymous_variant	LOW	ZK896.1	WBGene00014132	transcript	ZK896.1	protein_coding
IV	12873309	A	[G]	{G, A}	0.0909091	1	TRUE	FALSE	TRUE	0.166551	66	0	6	60	G	synonymous_variant	LOW	ZK896.1	WBGene00014132	transcript	ZK896.1	protein_coding
IV	12874126	A	[G]	{G, A}	0.0757576	1	TRUE	FALSE	TRUE	0.141106	66	0	5	61	G	synonymous_variant	LOW	ZK896.1	WBGene00014132	transcript	ZK896.1	protein_coding
IV	12874202	G	[C]	{C, G}	0.0909091	1	TRUE	FALSE	FALSE	0.166551	66	0	6	60	C	synonymous_variant	LOW	ZK896.1	WBGene00014132	transcript	ZK896.1	protein_coding
IV	12874493	A	[G]	{G, A}	0.0909091	1	TRUE	FALSE	TRUE	0.166551	66	0	6	60	G	synonymous_variant	LOW	ZK896.1	WBGene00014132	transcript	ZK896.1	protein_coding
IV	12874550	A	[G]	{G, A}	0.0909091	1	TRUE	FALSE	TRUE	0.166551	66	0	6	60	G	synonymous_variant	LOW	ZK896.1	WBGene00014132	transcript	ZK896.1	protein_coding
IV	12874566	G	[GA, GAA]	{G, GAA, GA}	0.257576	1	FALSE	TRUE	FALSE	0.385381	66	2	16	48	GA	splice_region_variant&intron_variant	LOW	ZK896.1	WBGene00014132	transcript	ZK896.1	protein_coding
IV	12874692	G	[A]	{G, A}	0.0909091	1	TRUE	FALSE	TRUE	0.166551	66	0	6	60	A	synonymous_variant	LOW	ZK896.1	WBGene00014132	transcript	ZK896.1	protein_coding
IV	12874698	G	[A]	{G, A}	0.0909091	1	TRUE	FALSE	TRUE	0.166551	66	0	6	60	A	synonymous_variant	LOW	ZK896.1	WBGene00014132	transcript	ZK896.1	protein_coding
IV	12874836	T	[A]	{A, T}	0.0151515	1	TRUE	FALSE	FALSE	0.0300717	66	0	1	65	A	splice_region_variant&intron_variant	LOW	ZK896.1	WBGene00014132	transcript	ZK896.1	protein_coding
IV	12874884	A	[G]	{G, A}	0.0909091	1	TRUE	FALSE	TRUE	0.166551	66	0	6	60	G	synonymous_variant	LOW	ZK896.1	WBGene00014132	transcript	ZK896.1	protein_coding
IV	12874938	G	[A]	{G, A}	0.0909091	1	TRUE	FALSE	TRUE	0.166551	66	0	6	60	A	splice_region_variant&synonymous_variant	LOW	ZK896.1	WBGene00014132	transcript	ZK896.1	protein_coding
IV	12875033	T	[C]	{C, T}	0.0909091	1	TRUE	FALSE	TRUE	0.166551	66	0	6	60	C	splice_region_variant&intron_variant	LOW	ZK896.1	WBGene00014132	transcript	ZK896.1	protein_coding
IV	12875044	G	[A]	{G, A}	0.0909091	1	TRUE	FALSE	TRUE	0.166551	66	0	6	60	A	synonymous_variant	LOW	ZK896.1	WBGene00014132	transcript	ZK896.1	protein_coding
IV	12875047	A	[T]	{A, T}	0.0909091	1	TRUE	FALSE	FALSE	0.166551	66	0	6	60	T	synonymous_variant	LOW	ZK896.1	WBGene00014132	transcript	ZK896.1	protein_coding
IV	12875134	C	[A]	{C, A}	0.0909091	1	TRUE	FALSE	FALSE	0.166551	66	0	6	60	A	synonymous_variant	LOW	ZK896.1	WBGene00014132	transcript	ZK896.1	protein_coding
IV	12877097	C	[T]	{C, T}	0.0833333	1	TRUE	FALSE	TRUE	0.153944	66	1	5	60	T	splice_region_variant&intron_variant	LOW	ZK896.5	WBGene00014136	transcript	ZK896.5.1	protein_coding
IV	12877132	C	[T]	{C, T}	0.0833333	1	TRUE	FALSE	TRUE	0.153944	66	1	5	60	T	synonymous_variant	LOW	ZK896.5	WBGene00014136	transcript	ZK896.5.1	protein_coding
IV	12877171	C	[T]	{C, T}	0.128788	1	TRUE	FALSE	TRUE	0.226116	66	5	6	55	T	synonymous_variant	LOW	ZK896.5	WBGene00014136	transcript	ZK896.5.1	protein_coding
IV	12877470	A	[C, T]	{C, A, T}	0.0454545	1	TRUE	FALSE	FALSE	0.0874393	66	6	0	60	C	synonymous_variant	LOW	ZK896.5	WBGene00014136	transcript	ZK896.5.1	protein_coding
IV	12877640	A	[G]	{G, A}	0.0909091	1	TRUE	FALSE	TRUE	0.166551	66	0	6	60	G	synonymous_variant	LOW	ZK896.5	WBGene00014136	transcript	ZK896.5.1	protein_coding
IV	12877961	C	[A]	{C, A}	0.0151515	1	TRUE	FALSE	FALSE	0.0300717	66	0	1	65	A	synonymous_variant	LOW	ZK896.5	WBGene00014136	transcript	ZK896.5.1	protein_coding
IV	12878269	A	[G]	{G, A}	0.0151515	1	TRUE	FALSE	TRUE	0.0300717	66	0	1	65	G	synonymous_variant	LOW	ZK896.5	WBGene00014136	transcript	ZK896.5.1	protein_coding
IV	12878332	A	[G]	{G, A}	0.0757576	1	TRUE	FALSE	TRUE	0.141106	66	0	5	61	G	splice_region_variant&intron_variant	LOW	ZK896.5	WBGene00014136	transcript	ZK896.5.1	protein_coding
IV	12878350	T	[C]	{C, T}	0.401515	1	TRUE	FALSE	TRUE	0.48427	66	5	24	37	C	synonymous_variant	LOW	ZK896.5	WBGene00014136	transcript	ZK896.5.1	protein_coding
IV	12878362	T	[G]	{G, T}	0.325758	1	TRUE	FALSE	FALSE	0.442632	66	5	19	42	G	synonymous_variant	LOW	ZK896.5	WBGene00014136	transcript	ZK896.5.1	protein_coding
IV	12878365	G	[T]	{G, T}	0.439394	1	TRUE	FALSE	FALSE	0.496415	66	10	24	32	T	synonymous_variant	LOW	ZK896.5	WBGene00014136	transcript	ZK896.5.1	protein_coding
IV	12878368	A	[G]	{G, A}	0.454545	1	TRUE	FALSE	TRUE	0.499653	66	12	24	30	G	synonymous_variant	LOW	ZK896.5	WBGene00014136	transcript	ZK896.5.1	protein_coding
IV	12878515	C	[T]	{C, T}	0.0909091	1	TRUE	FALSE	TRUE	0.166551	66	0	6	60	T	synonymous_variant	LOW	ZK896.5	WBGene00014136	transcript	ZK896.5.1	protein_coding
IV	12878524	A	[G]	{G, A}	0.0909091	1	TRUE	FALSE	TRUE	0.166551	66	0	6	60	G	synonymous_variant	LOW	ZK896.5	WBGene00014136	transcript	ZK896.5.1	protein_coding
IV	12878678	T	[A]	{A, T}	0.121212	1	TRUE	FALSE	FALSE	0.214666	66	0	8	58	A	splice_region_variant&intron_variant	LOW	ZK896.5	WBGene00014136	transcript	ZK896.5.1	protein_coding
IV	12878701	T	[G]	{G, T}	0.121212	1	TRUE	FALSE	FALSE	0.214666	66	0	8	58	G	synonymous_variant	LOW	ZK896.5	WBGene00014136	transcript	ZK896.5.1	protein_coding
IV	12878725	C	[T]	{C, T}	0.121212	1	TRUE	FALSE	TRUE	0.214666	66	0	8	58	T	synonymous_variant	LOW	ZK896.5	WBGene00014136	transcript	ZK896.5.1	protein_coding
IV	12878795	T	[A]	{A, T}	0.121212	1	TRUE	FALSE	FALSE	0.214666	66	0	8	58	A	splice_region_variant&intron_variant	LOW	ZK896.5	WBGene00014136	transcript	ZK896.5.1	protein_coding
IV	12878851	A	[C]	{C, A}	0.212121	1	TRUE	FALSE	FALSE	0.336803	66	0	14	52	C	synonymous_variant	LOW	ZK896.5	WBGene00014136	transcript	ZK896.5.1	protein_coding
IV	12878871	G	[A]	{G, A}	0.121212	1	TRUE	FALSE	TRUE	0.214666	66	0	8	58	A	synonymous_variant	LOW	ZK896.5	WBGene00014136	transcript	ZK896.5.1	protein_coding
IV	12878872	A	[G]	{G, A}	0.121212	1	TRUE	FALSE	TRUE	0.214666	66	0	8	58	G	synonymous_variant	LOW	ZK896.5	WBGene00014136	transcript	ZK896.5.1	protein_coding
IV	12879118	A	[G]	{G, A}	0.0606061	1	TRUE	FALSE	TRUE	0.114735	66	0	4	62	G	synonymous_variant	LOW	ZK896.5	WBGene00014136	transcript	ZK896.5.1	protein_coding
IV	12879142	A	[G]	{G, A}	0.0606061	1	TRUE	FALSE	TRUE	0.114735	66	0	4	62	G	synonymous_variant	LOW	ZK896.5	WBGene00014136	transcript	ZK896.5.1	protein_coding
IV	12879145	A	[G]	{G, A}	0.0606061	1	TRUE	FALSE	TRUE	0.114735	66	0	4	62	G	synonymous_variant	LOW	ZK896.5	WBGene00014136	transcript	ZK896.5.1	protein_coding
IV	12879190	G	[C]	{C, G}	0.0606061	1	TRUE	FALSE	FALSE	0.114735	66	0	4	62	C	synonymous_variant	LOW	ZK896.5	WBGene00014136	transcript	ZK896.5.1	protein_coding
IV	12879202	G	[A]	{G, A}	0.0606061	1	TRUE	FALSE	TRUE	0.114735	66	0	4	62	A	synonymous_variant	LOW	ZK896.5	WBGene00014136	transcript	ZK896.5.1	protein_coding
IV	12879205	A	[C]	{C, A}	0.0606061	1	TRUE	FALSE	FALSE	0.114735	66	0	4	62	C	synonymous_variant	LOW	ZK896.5	WBGene00014136	transcript	ZK896.5.1	protein_coding
IV	12879553	C	[A]	{C, A}	0.0606061	1	TRUE	FALSE	FALSE	0.114735	66	0	4	62	A	splice_region_variant&intron_variant	LOW	ZK896.5	WBGene00014136	transcript	ZK896.5.1	protein_coding
IV	12879646	C	[T]	{C, T}	0.0909091	1	TRUE	FALSE	TRUE	0.166551	66	0	6	60	T	5_prime_UTR_premature_start_codon_gain_variant	LOW	ZK896.5	WBGene00014136	transcript	ZK896.5.1	protein_coding
IV	12880636	C	[A]	{C, A}	0.0153846	0.984848	TRUE	FALSE	FALSE	0.0305307	65	0	1	64	A	splice_region_variant	LOW	ZK896.4	WBGene00014135	transcript	ZK896.4	protein_coding
IV	12880691	C	[T]	{C, T}	0.0606061	1	TRUE	FALSE	TRUE	0.114735	66	0	4	62	T	synonymous_variant	LOW	ZK896.4	WBGene00014135	transcript	ZK896.4	protein_coding
IV	12880709	G	[A]	{G, A}	0.0606061	1	TRUE	FALSE	TRUE	0.114735	66	0	4	62	A	synonymous_variant	LOW	ZK896.4	WBGene00014135	transcript	ZK896.4	protein_coding
IV	12880862	G	[T]	{G, T}	0.0606061	1	TRUE	FALSE	FALSE	0.114735	66	0	4	62	T	synonymous_variant	LOW	ZK896.4	WBGene00014135	transcript	ZK896.4	protein_coding
IV	12880883	A	[G]	{G, A}	0.0606061	1	TRUE	FALSE	TRUE	0.114735	66	0	4	62	G	synonymous_variant	LOW	ZK896.4	WBGene00014135	transcript	ZK896.4	protein_coding
IV	12880886	G	[A]	{G, A}	0.0606061	1	TRUE	FALSE	TRUE	0.114735	66	0	4	62	A	synonymous_variant	LOW	ZK896.4	WBGene00014135	transcript	ZK896.4	protein_coding
IV	12880895	C	[G]	{C, G}	0.0606061	1	TRUE	FALSE	FALSE	0.114735	66	0	4	62	G	synonymous_variant	LOW	ZK896.4	WBGene00014135	transcript	ZK896.4	protein_coding
IV	12880953	C	[T]	{C, T}	0.0606061	1	TRUE	FALSE	TRUE	0.114735	66	0	4	62	T	splice_region_variant&intron_variant	LOW	ZK896.4	WBGene00014135	transcript	ZK896.4	protein_coding
IV	12880958	G	[A]	{G, A}	0.0606061	1	TRUE	FALSE	TRUE	0.114735	66	0	4	62	A	splice_region_variant&synonymous_variant	LOW	ZK896.4	WBGene00014135	transcript	ZK896.4	protein_coding
IV	12881021	T	[G]	{G, T}	0.0151515	1	TRUE	FALSE	FALSE	0.0300717	66	0	1	65	G	synonymous_variant	LOW	ZK896.4	WBGene00014135	transcript	ZK896.4	protein_coding
IV	12881057	C	[T]	{C, T}	0.0606061	1	TRUE	FALSE	TRUE	0.114735	66	0	4	62	T	synonymous_variant	LOW	ZK896.4	WBGene00014135	transcript	ZK896.4	protein_coding
IV	12881069	T	[G]	{G, T}	0.0606061	1	TRUE	FALSE	FALSE	0.114735	66	0	4	62	G	synonymous_variant	LOW	ZK896.4	WBGene00014135	transcript	ZK896.4	protein_coding
IV	12881114	A	[G]	{G, A}	0.0606061	1	TRUE	FALSE	TRUE	0.114735	66	0	4	62	G	synonymous_variant	LOW	ZK896.4	WBGene00014135	transcript	ZK896.4	protein_coding
IV	12881132	A	[T]	{A, T}	0.0606061	1	TRUE	FALSE	FALSE	0.114735	66	0	4	62	T	synonymous_variant	LOW	ZK896.4	WBGene00014135	transcript	ZK896.4	protein_coding
IV	12881144	A	[T]	{A, T}	0.0606061	1	TRUE	FALSE	FALSE	0.114735	66	0	4	62	T	synonymous_variant	LOW	ZK896.4	WBGene00014135	transcript	ZK896.4	protein_coding
IV	12881159	G	[A]	{G, A}	0.0606061	1	TRUE	FALSE	TRUE	0.114735	66	0	4	62	A	synonymous_variant	LOW	ZK896.4	WBGene00014135	transcript	ZK896.4	protein_coding
IV	12881166	A	[G]	{G, A}	0.0606061	1	TRUE	FALSE	TRUE	0.114735	66	0	4	62	G	splice_region_variant&intron_variant	LOW	ZK896.4	WBGene00014135	transcript	ZK896.4	protein_coding
IV	12881167	A	[T]	{A, T}	0.0606061	1	TRUE	FALSE	FALSE	0.114735	66	0	4	62	T	splice_region_variant&intron_variant	LOW	ZK896.4	WBGene00014135	transcript	ZK896.4	protein_coding
IV	12881382	C	[G]	{C, G}	0.0454545	1	TRUE	FALSE	FALSE	0.0874393	66	0	3	63	G	synonymous_variant	LOW	ZK896.4	WBGene00014135	transcript	ZK896.4	protein_coding
IV	12881447	TTTA	[T]	{TTTA, T}	0.0151515	1	FALSE	TRUE	FALSE	0.0300717	66	0	1	65	T	splice_region_variant&intron_variant	LOW	ZK896.4	WBGene00014135	transcript	ZK896.4	protein_coding
IV	12881448	TTAA	[T, TA]	{TTAA, T}	0.0606061	1	FALSE	TRUE	FALSE	0.114735	66	0	4	62	TA	splice_region_variant&intron_variant	LOW	ZK896.4	WBGene00014135	transcript	ZK896.4	protein_coding
IV	12881449	TAA	[T, TAAA]	{TAA, TAAA}	0.015873	0.954545	FALSE	TRUE	FALSE	0.0314921	63	0	1	62	T	splice_region_variant&intron_variant	LOW	ZK896.4	WBGene00014135	transcript	ZK896.4	protein_coding
IV	12881781	C	[A]	{C, A}	0.0606061	1	TRUE	FALSE	FALSE	0.114735	66	0	4	62	A	synonymous_variant	LOW	ZK896.4	WBGene00014135	transcript	ZK896.4	protein_coding
IV	12881784	G	[A]	{G, A}	0.0606061	1	TRUE	FALSE	TRUE	0.114735	66	0	4	62	A	synonymous_variant	LOW	ZK896.4	WBGene00014135	transcript	ZK896.4	protein_coding
IV	12881805	A	[G]	{G, A}	0.0606061	1	TRUE	FALSE	TRUE	0.114735	66	0	4	62	G	synonymous_variant	LOW	ZK896.4	WBGene00014135	transcript	ZK896.4	protein_coding
IV	12881943	A	[G]	{G, A}	0.0606061	1	TRUE	FALSE	TRUE	0.114735	66	0	4	62	G	splice_region_variant&intron_variant	LOW	ZK896.4	WBGene00014135	transcript	ZK896.4	protein_coding
IV	12881992	T	[C]	{C, T}	0.0151515	1	TRUE	FALSE	TRUE	0.0300717	66	0	1	65	C	synonymous_variant	LOW	ZK896.4	WBGene00014135	transcript	ZK896.4	protein_coding
IV	12882040	A	[G, C]	{C, A}	0.0606061	1	TRUE	FALSE	FALSE	0.114735	66	0	4	62	C	synonymous_variant	LOW	ZK896.4	WBGene00014135	transcript	ZK896.4	protein_coding
IV	12882049	G	[A]	{G, A}	0.0606061	1	TRUE	FALSE	TRUE	0.114735	66	0	4	62	A	synonymous_variant	LOW	ZK896.4	WBGene00014135	transcript	ZK896.4	protein_coding
IV	12882061	T	[C]	{C, T}	0.0606061	1	TRUE	FALSE	TRUE	0.114735	66	0	4	62	C	synonymous_variant	LOW	ZK896.4	WBGene00014135	transcript	ZK896.4	protein_coding
IV	12882130	A	[G]	{G, A}	0.0606061	1	TRUE	FALSE	TRUE	0.114735	66	0	4	62	G	synonymous_variant	LOW	ZK896.4	WBGene00014135	transcript	ZK896.4	protein_coding
IV	12882133	A	[C]	{C, A}	0.0606061	1	TRUE	FALSE	FALSE	0.114735	66	0	4	62	C	synonymous_variant	LOW	ZK896.4	WBGene00014135	transcript	ZK896.4	protein_coding
IV	12882136	A	[G]	{G, A}	0.0606061	1	TRUE	FALSE	TRUE	0.114735	66	0	4	62	G	synonymous_variant	LOW	ZK896.4	WBGene00014135	transcript	ZK896.4	protein_coding
IV	12882500	C	[T]	{C, T}	0.0606061	1	TRUE	FALSE	TRUE	0.114735	66	0	4	62	T	synonymous_variant	LOW	ZK896.4	WBGene00014135	transcript	ZK896.4	protein_coding
IV	12882513	A	[G]	{G, A}	0.0606061	1	TRUE	FALSE	TRUE	0.114735	66	0	4	62	G	splice_region_variant&intron_variant	LOW	ZK896.4	WBGene00014135	transcript	ZK896.4	protein_coding
IV	12882574	A	[G]	{G, A}	0.0454545	1	TRUE	FALSE	TRUE	0.0874393	66	0	3	63	G	synonymous_variant	LOW	ZK896.4	WBGene00014135	transcript	ZK896.4	protein_coding
IV	12882577	T	[A]	{A, T}	0.0606061	1	TRUE	FALSE	FALSE	0.114735	66	0	4	62	A	synonymous_variant	LOW	ZK896.4	WBGene00014135	transcript	ZK896.4	protein_coding
IV	12882607	T	[A]	{A, T}	0.0606061	1	TRUE	FALSE	FALSE	0.114735	66	0	4	62	A	synonymous_variant	LOW	ZK896.4	WBGene00014135	transcript	ZK896.4	protein_coding
IV	12882613	C	[T]	{C, T}	0.0606061	1	TRUE	FALSE	TRUE	0.114735	66	0	4	62	T	synonymous_variant	LOW	ZK896.4	WBGene00014135	transcript	ZK896.4	protein_coding
IV	12882619	T	[G]	{G, T}	0.0606061	1	TRUE	FALSE	FALSE	0.114735	66	0	4	62	G	synonymous_variant	LOW	ZK896.4	WBGene00014135	transcript	ZK896.4	protein_coding
IV	12882634	C	[T]	{C, T}	0.0606061	1	TRUE	FALSE	TRUE	0.114735	66	0	4	62	T	synonymous_variant	LOW	ZK896.4	WBGene00014135	transcript	ZK896.4	protein_coding
IV	12882790	T	[C]	{C, T}	0.0151515	1	TRUE	FALSE	TRUE	0.0300717	66	0	1	65	C	synonymous_variant	LOW	ZK896.4	WBGene00014135	transcript	ZK896.4	protein_coding
IV	12882888	AT	[A]	{AT, A}	0.0606061	1	FALSE	TRUE	FALSE	0.114735	66	0	4	62	A	splice_region_variant&intron_variant	LOW	ZK896.4	WBGene00014135	transcript	ZK896.4	protein_coding
IV	12883550	C	[T]	{C, T}	0.257576	1	TRUE	FALSE	TRUE	0.385381	66	0	17	49	T	splice_region_variant&non_coding_transcript_exon_variant	LOW	ZK896.3	WBGene00014134	transcript	ZK896.3	pseudogene
IV	12883591	T	[C]	{C, T}	0.0151515	1	TRUE	FALSE	TRUE	0.0300717	66	0	1	65	C	splice_region_variant&intron_variant	LOW	ZK896.3	WBGene00014134	transcript	ZK896.3	pseudogene
IV	12884091	T	[A]	{A, T}	0.0151515	1	TRUE	FALSE	FALSE	0.0300717	66	0	1	65	A	splice_region_variant&intron_variant	LOW	ZK896.3	WBGene00014134	transcript	ZK896.3	pseudogene
IV	12885050	G	[T, A]	{G, T}	0.0151515	1	TRUE	FALSE	FALSE	0.0300717	66	0	1	65	A	splice_region_variant&intron_variant	LOW	ZK896.3	WBGene00014134	transcript	ZK896.3	pseudogene
IV	12885051	A	[G]	{G, A}	0.0151515	1	TRUE	FALSE	TRUE	0.0300717	66	0	1	65	G	splice_region_variant&intron_variant	LOW	ZK896.3	WBGene00014134	transcript	ZK896.3	pseudogene
IV	12885211	A	[G]	{G, A}	0.0151515	1	TRUE	FALSE	TRUE	0.0300717	66	0	1	65	G	splice_region_variant&intron_variant	LOW	ZK896.3	WBGene00014134	transcript	ZK896.3	pseudogene
IV	12885216	C	[A]	{C, A}	0.0151515	1	TRUE	FALSE	FALSE	0.0300717	66	0	1	65	A	splice_region_variant&intron_variant	LOW	ZK896.3	WBGene00014134	transcript	ZK896.3	pseudogene
IV	12885250	C	[T]	{C, T}	0.0151515	1	TRUE	FALSE	TRUE	0.0300717	66	0	1	65	T	splice_region_variant&intron_variant	LOW	ZK896.3	WBGene00014134	transcript	ZK896.3	pseudogene
IV	12885731	A	[AT]	{AT, A}	0.0151515	1	FALSE	TRUE	FALSE	0.0300717	66	0	1	65	AT	splice_region_variant&intron_variant	LOW	ZK896.3	WBGene00014134	transcript	ZK896.3	pseudogene
IV	12887293	C	[T]	{C, T}	0.424242	1	TRUE	FALSE	TRUE	0.492251	66	0	28	38	T	stop_retained_variant	LOW	K08D8.6	WBGene00010660	transcript	K08D8.6a	protein_coding
IV	12887295	C	[T]	{C, T}	0.0151515	1	TRUE	FALSE	TRUE	0.0300717	66	0	1	65	T	synonymous_variant	LOW	K08D8.6	WBGene00010660	transcript	K08D8.6a	protein_coding
IV	12887297	G	[A]	{G, A}	0.0151515	1	TRUE	FALSE	TRUE	0.0300717	66	0	1	65	A	synonymous_variant	LOW	K08D8.6	WBGene00010660	transcript	K08D8.6a	protein_coding
IV	12887411	C	[T]	{C, T}	0.121212	1	TRUE	FALSE	TRUE	0.214666	66	0	8	58	T	synonymous_variant	LOW	K08D8.6	WBGene00010660	transcript	K08D8.6a	protein_coding
IV	12887459	G	[A]	{G, A}	0.0151515	1	TRUE	FALSE	TRUE	0.0300717	66	0	1	65	A	synonymous_variant	LOW	K08D8.6	WBGene00010660	transcript	K08D8.6a	protein_coding
IV	12887471	C	[G]	{C, G}	0.0151515	1	TRUE	FALSE	FALSE	0.0300717	66	0	1	65	G	synonymous_variant	LOW	K08D8.6	WBGene00010660	transcript	K08D8.6a	protein_coding
IV	12887498	T	[A]	{A, T}	0.212121	1	TRUE	FALSE	FALSE	0.336803	66	0	14	52	A	synonymous_variant	LOW	K08D8.6	WBGene00010660	transcript	K08D8.6a	protein_coding
IV	12887516	G	[A]	{G, A}	0.0151515	1	TRUE	FALSE	TRUE	0.0300717	66	0	1	65	A	synonymous_variant	LOW	K08D8.6	WBGene00010660	transcript	K08D8.6a	protein_coding
IV	12887525	A	[G]	{G, A}	0.0151515	1	TRUE	FALSE	TRUE	0.0300717	66	0	1	65	G	synonymous_variant	LOW	K08D8.6	WBGene00010660	transcript	K08D8.6a	protein_coding
IV	12887806	A	[T]	{A, T}	0.0151515	1	TRUE	FALSE	FALSE	0.0300717	66	0	1	65	T	synonymous_variant	LOW	K08D8.6	WBGene00010660	transcript	K08D8.6a	protein_coding
IV	12887818	A	[G]	{G, A}	0.0151515	1	TRUE	FALSE	TRUE	0.0300717	66	0	1	65	G	synonymous_variant	LOW	K08D8.6	WBGene00010660	transcript	K08D8.6a	protein_coding
IV	12887821	T	[C]	{C, T}	0.0151515	1	TRUE	FALSE	TRUE	0.0300717	66	0	1	65	C	synonymous_variant	LOW	K08D8.6	WBGene00010660	transcript	K08D8.6a	protein_coding
IV	12887833	A	[G]	{G, A}	0.121212	1	TRUE	FALSE	TRUE	0.214666	66	0	8	58	G	synonymous_variant	LOW	K08D8.6	WBGene00010660	transcript	K08D8.6a	protein_coding
IV	12887836	T	[A]	{A, T}	0.0151515	1	TRUE	FALSE	FALSE	0.0300717	66	0	1	65	A	synonymous_variant	LOW	K08D8.6	WBGene00010660	transcript	K08D8.6a	protein_coding
IV	12887845	T	[C]	{C, T}	0.0151515	1	TRUE	FALSE	TRUE	0.0300717	66	0	1	65	C	synonymous_variant	LOW	K08D8.6	WBGene00010660	transcript	K08D8.6a	protein_coding
IV	12887863	A	[G]	{G, A}	0.0151515	1	TRUE	FALSE	TRUE	0.0300717	66	0	1	65	G	synonymous_variant	LOW	K08D8.6	WBGene00010660	transcript	K08D8.6a	protein_coding
IV	12887875	C	[T]	{C, T}	0.030303	1	TRUE	FALSE	TRUE	0.0592181	66	0	2	64	T	synonymous_variant	LOW	K08D8.6	WBGene00010660	transcript	K08D8.6a	protein_coding
IV	12887878	C	[T]	{C, T}	0.0151515	1	TRUE	FALSE	TRUE	0.0300717	66	0	1	65	T	synonymous_variant	LOW	K08D8.6	WBGene00010660	transcript	K08D8.6a	protein_coding
IV	12887989	TA	[T]	{TA, T}	0.0151515	1	FALSE	TRUE	FALSE	0.0300717	66	0	1	65	T	splice_region_variant&intron_variant	LOW	K08D8.6	WBGene00010660	transcript	K08D8.6a	protein_coding
IV	12888333	T	[A]	{A, T}	0.0151515	1	TRUE	FALSE	FALSE	0.0300717	66	0	1	65	A	synonymous_variant	LOW	K08D8.6	WBGene00010660	transcript	K08D8.6a	protein_coding
IV	12888541	A	[G]	{G, A}	0.0151515	1	TRUE	FALSE	TRUE	0.0300717	66	0	1	65	G	synonymous_variant	LOW	K08D8.6	WBGene00010660	transcript	K08D8.6a	protein_coding
IV	12888544	G	[A]	{G, A}	0.0151515	1	TRUE	FALSE	TRUE	0.0300717	66	0	1	65	A	synonymous_variant	LOW	K08D8.6	WBGene00010660	transcript	K08D8.6a	protein_coding
IV	12888601	C	[T]	{C, T}	0.0151515	1	TRUE	FALSE	TRUE	0.0300717	66	0	1	65	T	synonymous_variant	LOW	K08D8.6	WBGene00010660	transcript	K08D8.6a	protein_coding
IV	12888617	G	[A]	{G, A}	0.0151515	1	TRUE	FALSE	TRUE	0.0300717	66	0	1	65	A	splice_region_variant&intron_variant	LOW	K08D8.6	WBGene00010660	transcript	K08D8.6a	protein_coding
IV	12888664	C	[T]	{C, T}	0.0151515	1	TRUE	FALSE	TRUE	0.0300717	66	0	1	65	T	splice_region_variant&intron_variant	LOW	K08D8.6	WBGene00010660	transcript	K08D8.6a	protein_coding
IV	12888811	A	[G]	{G, A}	0.0151515	1	TRUE	FALSE	TRUE	0.0300717	66	0	1	65	G	synonymous_variant	LOW	K08D8.6	WBGene00010660	transcript	K08D8.6a	protein_coding
IV	12888823	A	[G]	{G, A}	0.0151515	1	TRUE	FALSE	TRUE	0.0300717	66	0	1	65	G	synonymous_variant	LOW	K08D8.6	WBGene00010660	transcript	K08D8.6a	protein_coding
IV	12888850	G	[A]	{G, A}	0.0151515	1	TRUE	FALSE	TRUE	0.0300717	66	0	1	65	A	synonymous_variant	LOW	K08D8.6	WBGene00010660	transcript	K08D8.6a	protein_coding
IV	12888877	G	[T]	{G, T}	0.0151515	1	TRUE	FALSE	FALSE	0.0300717	66	0	1	65	T	synonymous_variant	LOW	K08D8.6	WBGene00010660	transcript	K08D8.6a	protein_coding
IV	12889511	C	[A]	{C, A}	0.0151515	1	TRUE	FALSE	FALSE	0.0300717	66	0	1	65	A	splice_region_variant&synonymous_variant	LOW	K08D8.6	WBGene00010660	transcript	K08D8.6a	protein_coding
IV	12889523	G	[A]	{G, A}	0.0151515	1	TRUE	FALSE	TRUE	0.0300717	66	0	1	65	A	synonymous_variant	LOW	K08D8.6	WBGene00010660	transcript	K08D8.6a	protein_coding
IV	12889538	G	[A]	{G, A}	0.454545	1	TRUE	FALSE	TRUE	0.499653	66	0	30	36	A	synonymous_variant	LOW	K08D8.6	WBGene00010660	transcript	K08D8.6a	protein_coding
IV	12889607	A	[G]	{G, A}	0.0153846	0.984848	TRUE	FALSE	TRUE	0.0305307	65	0	1	64	G	synonymous_variant	LOW	K08D8.6	WBGene00010660	transcript	K08D8.6a	protein_coding
IV	12889623	T	[C]	{C, T}	0.0153846	0.984848	TRUE	FALSE	TRUE	0.0305307	65	0	1	64	C	splice_region_variant&intron_variant	LOW	K08D8.6	WBGene00010660	transcript	K08D8.6a	protein_coding
IV	12889676	G	[T]	{G, T}	0.0153846	0.984848	TRUE	FALSE	FALSE	0.0305307	65	0	1	64	T	splice_region_variant&intron_variant	LOW	K08D8.6	WBGene00010660	transcript	K08D8.6a	protein_coding
IV	12889742	A	[T]	{A, T}	0.0151515	1	TRUE	FALSE	FALSE	0.0300717	66	0	1	65	T	synonymous_variant	LOW	K08D8.6	WBGene00010660	transcript	K08D8.6a	protein_coding
IV	12889748	G	[A]	{G, A}	0.0151515	1	TRUE	FALSE	TRUE	0.0300717	66	0	1	65	A	synonymous_variant	LOW	K08D8.6	WBGene00010660	transcript	K08D8.6a	protein_coding
IV	12889757	G	[A]	{G, A}	0.0151515	1	TRUE	FALSE	TRUE	0.0300717	66	0	1	65	A	synonymous_variant	LOW	K08D8.6	WBGene00010660	transcript	K08D8.6a	protein_coding
IV	12889775	A	[G]	{G, A}	0.0151515	1	TRUE	FALSE	TRUE	0.0300717	66	0	1	65	G	synonymous_variant	LOW	K08D8.6	WBGene00010660	transcript	K08D8.6a	protein_coding
IV	12889845	C	[G]	{C, G}	0.0151515	1	TRUE	FALSE	FALSE	0.0300717	66	0	1	65	G	synonymous_variant	LOW	K08D8.6	WBGene00010660	transcript	K08D8.6a	protein_coding
IV	12889854	C	[T]	{C, T}	0.0151515	1	TRUE	FALSE	TRUE	0.0300717	66	0	1	65	T	synonymous_variant	LOW	K08D8.6	WBGene00010660	transcript	K08D8.6a	protein_coding
IV	12889890	G	[A]	{G, A}	0.0151515	1	TRUE	FALSE	TRUE	0.0300717	66	0	1	65	A	synonymous_variant	LOW	K08D8.6	WBGene00010660	transcript	K08D8.6a	protein_coding
IV	12889941	A	[G]	{G, A}	0.0151515	1	TRUE	FALSE	TRUE	0.0300717	66	0	1	65	G	synonymous_variant	LOW	K08D8.6	WBGene00010660	transcript	K08D8.6a	protein_coding
IV	12889952	A	[G]	{G, A}	0.0151515	1	TRUE	FALSE	TRUE	0.0300717	66	0	1	65	G	splice_region_variant&intron_variant	LOW	K08D8.6	WBGene00010660	transcript	K08D8.6a	protein_coding
IV	12890438	G	[T]	{G, T}	0.0151515	1	TRUE	FALSE	FALSE	0.0300717	66	0	1	65	T	synonymous_variant	LOW	K08D8.6	WBGene00010660	transcript	K08D8.6a	protein_coding
IV	12892575	C	[T]	{C, T}	0.0153846	0.984848	TRUE	FALSE	TRUE	0.0305307	65	0	1	64	T	synonymous_variant	LOW	K08D8.1	WBGene00010655	transcript	K08D8.1	protein_coding
IV	12893220	G	[A]	{G, A}	0.0153846	0.984848	TRUE	FALSE	TRUE	0.0305307	65	0	1	64	A	synonymous_variant	LOW	K08D8.1	WBGene00010655	transcript	K08D8.1	protein_coding
IV	12894253	T	[C]	{C, T}	0.0151515	1	TRUE	FALSE	TRUE	0.0300717	66	0	1	65	C	splice_region_variant&intron_variant	LOW	K08D8.12	WBGene00194926	transcript	K08D8.12a	protein_coding
IV	12894267	C	[T]	{C, T}	0.0151515	1	TRUE	FALSE	TRUE	0.0300717	66	0	1	65	T	synonymous_variant	LOW	K08D8.12	WBGene00194926	transcript	K08D8.12a	protein_coding
IV	12894621	C	[G]	{C, G}	0.0151515	1	TRUE	FALSE	FALSE	0.0300717	66	0	1	65	G	splice_region_variant&intron_variant	LOW	K08D8.12	WBGene00194926	transcript	K08D8.12b	protein_coding
IV	12894679	A	[C]	{C, A}	0.0151515	1	TRUE	FALSE	FALSE	0.0300717	66	0	1	65	C	synonymous_variant	LOW	K08D8.12	WBGene00194926	transcript	K08D8.12b	protein_coding
IV	12894682	C	[T]	{C, T}	0.0151515	1	TRUE	FALSE	TRUE	0.0300717	66	0	1	65	T	synonymous_variant	LOW	K08D8.12	WBGene00194926	transcript	K08D8.12b	protein_coding
IV	12894721	C	[T]	{C, T}	0.0151515	1	TRUE	FALSE	TRUE	0.0300717	66	0	1	65	T	synonymous_variant	LOW	K08D8.12	WBGene00194926	transcript	K08D8.12b	protein_coding
IV	12896142	A	[G]	{G, A}	0.454545	1	TRUE	FALSE	TRUE	0.499653	66	0	30	36	G	splice_region_variant&intron_variant	LOW	K08D8.11	WBGene00194925	transcript	K08D8.11	protein_coding
IV	12896737	A	[T]	{A, T}	0.0151515	1	TRUE	FALSE	FALSE	0.0300717	66	0	1	65	T	5_prime_UTR_premature_start_codon_gain_variant	LOW	K08D8.7	WBGene00185092	transcript	K08D8.7a	protein_coding
IV	12897105	G	[A]	{G, A}	0.242424	1	TRUE	FALSE	TRUE	0.370113	66	2	15	49	A	splice_region_variant&intron_variant	LOW	K08D8.7	WBGene00185092	transcript	K08D8.7a	protein_coding
IV	12897956	G	[A]	{G, A}	0.0151515	1	TRUE	FALSE	TRUE	0.0300717	66	0	1	65	A	synonymous_variant	LOW	K08D8.7	WBGene00185092	transcript	K08D8.7a	protein_coding
IV	12898327	C	[T]	{C, T}	0.257576	1	TRUE	FALSE	TRUE	0.385381	66	6	14	46	T	synonymous_variant	LOW	K08D8.7	WBGene00185092	transcript	K08D8.7a	protein_coding
[truncated: 1,225 more rows]

## Sheet: Modified
CHROM	POS	REF	ALT	allele_set	aaf	call_rate	is_snp	is_indel	is_transition	nucl_diversity	num_called	num_het	num_hom_alt	num_hom_ref	ANN	Mutation type	Impact	Gene name	WBGene ID	Transcript?	Gene ID	Gene Type
[truncated: 12,009 more rows]
[truncated: 10 more columns]

[truncated: 1 more sheets: Other]
